# Supplementary material for: Chemical proteomics reveal CD147 as a functional target of pseudolaric acid B in human cancer cells
Source: Royal Society of Chemistry journal article supplement (doi:10.1039/c7cc04345g), 2017-01-01
Supplement: c7cc04345g1.pdf [file c7cc04345g1.pdf]

**Electronic Supplementary Material (ESI) for**

**Chemical proteomics reveal CD147 as a functional target of  
pseudolaric acid B in human cancer cells**

Yiqing Zhou,<sup>a</sup> Zhengao Di,<sup>a</sup> Xiaoming Li,<sup>bc</sup> Yuanhong Shan,<sup>d</sup> Weichao Li,<sup>a</sup> Haibing Zhang,<sup>b</sup>  
and Youli Xiao<sup>\*acd</sup>

<sup>a</sup>CAS Key Laboratory of Synthetic Biology, CAS Center for Excellence in Molecular  
Plant Sciences, Institute of Plant Physiology and Ecology, Shanghai Institutes for  
Biological Sciences, Chinese Academy of Sciences, Shanghai 200032, China

<sup>b</sup>Institute for Nutritional Sciences, Shanghai Institutes for Biological Sciences,  
Chinese Academy of Sciences, Shanghai 200032, China

<sup>c</sup>University of Chinese Academy of Sciences, Beijing, 100039, China

<sup>d</sup>Core Facility Centre of the Institute of Plant Physiology and Ecology, Shanghai  
Institutes for Biological Sciences, Chinese Academy of Sciences, Shanghai 200032,  
China

# Table of Contents

|                                                                                                                                        |             |
|----------------------------------------------------------------------------------------------------------------------------------------|-------------|
| <b>1. Chemistry</b>                                                                                                                    | Pages 3-5   |
| 1.1 Synthesis of PAB-Dayne                                                                                                             | Page 3      |
| <b>Fig. S1</b> <sup>1</sup> H-NMR and <sup>13</sup> C-NMR data of PAB-Dayne                                                            | Page 3      |
| 1.2 Synthesis of Dead-Dayne                                                                                                            | Page 4      |
| <b>Fig. S2</b> <sup>1</sup> H-NMR and <sup>13</sup> C-NMR data of Dead-Dayne                                                           | Page 5      |
| <b>2. Biological experiments</b>                                                                                                       | Pages 6-15  |
| 2.1 Labeling of purified porcine brain tubulin                                                                                         | Page 6      |
| <b>Fig. S3</b> Dose-dependent labeling of tubulin by PAB-Dayne.                                                                        | Page 6      |
| 2.2 Cell proliferation assay                                                                                                           | Page 6      |
| <b>Table S1</b> IC <sub>50</sub> values of PAB and probes towards HeLa cells.                                                          | Page 7      |
| 2.3 Gel-based A/BPP in HeLa cells                                                                                                      | Page 7      |
| <b>Fig. S4</b> Full imaging of gels in Figure 2A.                                                                                      | Page 7      |
| 2.4 Microscopy                                                                                                                         | Page 7      |
| 2.5 Mass spectrometry-based A/BPP in HeLa cells                                                                                        | Page 8      |
| 2.6 Target validation by pull-down and western blot                                                                                    | Page 9      |
| 2.7 Labeling of recombinant CD147/CD98 proteins                                                                                        | Page 9      |
| 2.8 Disruption of CD147 oligomerization by PAB                                                                                         | Page 10     |
| 2.9 Binding site identification                                                                                                        | Page 10     |
| <b>Fig. S5</b> Amino acid sequence of human CD147 isoform 2                                                                            | Page 11     |
| 2.10 Western blot analysis of expression level of MMPs upon PAB treatment                                                              | Page 11     |
| 2.11 siRNA transfection                                                                                                                | Page 11     |
| 2.12 Molecular modeling                                                                                                                | Page 11     |
| <b>Fig. S6</b> Ligand interactions and secondary structure of docking                                                                  | Page 12     |
| 2.13 Global proteomic profiling of PAB-treated HeLa cells                                                                              | Page 12     |
| <b>Fig. S7</b> Gene Ontology (GO) biological processes analysis of over- and under-expressed proteins of HeLa cells upon PAB treatment | Page 13     |
| <b>Table S2</b> Top over- and under-expressed proteins upon PAB treatment                                                              | Page 14     |
| <b>3. Quantitative data of proteomic studies</b>                                                                                       | Pages 16-22 |
| <b>Table S3</b> Proteins identified from the pull-down/LC-MS experiments.                                                              | Page 16     |
| <b>Table S4</b> Global proteomic profiling of PAB-treated HeLa cells.                                                                  | Page 22     |
| <b>4. References</b>                                                                                                                   | Page 23     |



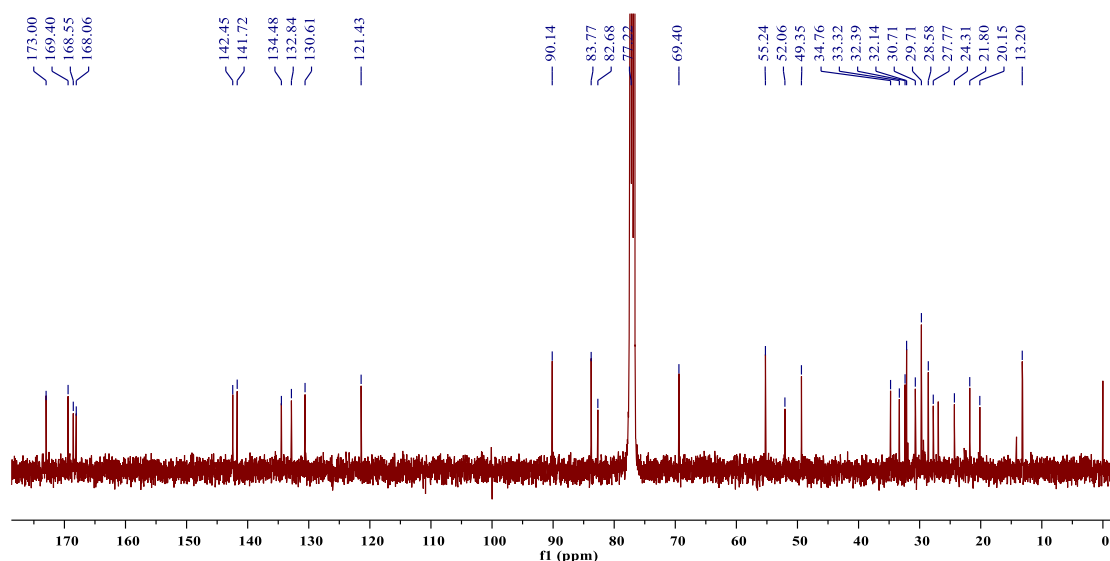

**Fig. S1**  $^1\text{H}$ -NMR and  $^{13}\text{C}$ -NMR data of PAB-Dayne.

## 1.2 Dead-Dayne

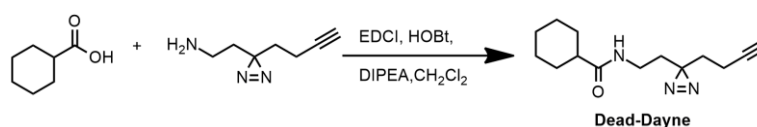

**Scheme S2** Synthesis of Dead-Dayne.

To a solution of cyclohexane carboxylic acid (13 mg, 1.2 eq) dissolved in DCM (3.0 mL) in ice bath was added 1-(3-dimethyl -aminopropyl)-3-ethylcarbodiimide hydrochloride (EDCI) (20 mg, 1.2 eq), hydroxyl -benzotriazole (HOBt) (14 mg, 1.2 eq), and *N,N*-diisopropyl-ethylamine (DIPEA) (18  $\mu\text{L}$ , 1.2 eq). After stirring for 5 min, 2-(2-azidoethyl)-2-(but-3-ynyl)-1,3-dioxolane (10 mg, 1 eq) was added to the reaction mixture. The resulting solution was warmed to room temperature slowly and stirred for overnight. The reaction mixture was diluted with EtOAc (30 mL), washed with 1 N HCl, saturated  $\text{NaHCO}_3$ , brine, and dried over anhydrous  $\text{Na}_2\text{SO}_4$ , filtered and concentrated. Purification by flash chromatography column afforded the product Dead-Dayne (16 mg, 90% yield).

$^1\text{H}$  NMR (500 MHz,  $\text{CDCl}_3$ )  $\delta$  5.55 (s, 1H), 3.11 (q,  $J$  = 6.4, 5.8 Hz, 2H), 2.11-1.99 (m, 4H), 1.91-1.77 (m, 4H), 1.72-1.65 (m, 4H), 1.48-1.37 (m, 2H), 1.34-1.27 (m, 4H).  $^{13}\text{C}$  NMR (125 MHz,  $\text{CDCl}_3$ )  $\delta$  176.08, 82.69, 69.35, 45.52, 34.17, 32.52, 32.19, 29.70, 29.63, 26.91, 25.74, 13.22. HRMS-ESI calcd. for  $\text{C}_{14}\text{H}_{22}\text{N}_3\text{O}$   $[\text{M}+\text{H}]^+$ : 248.1685; Found: 248.1608.

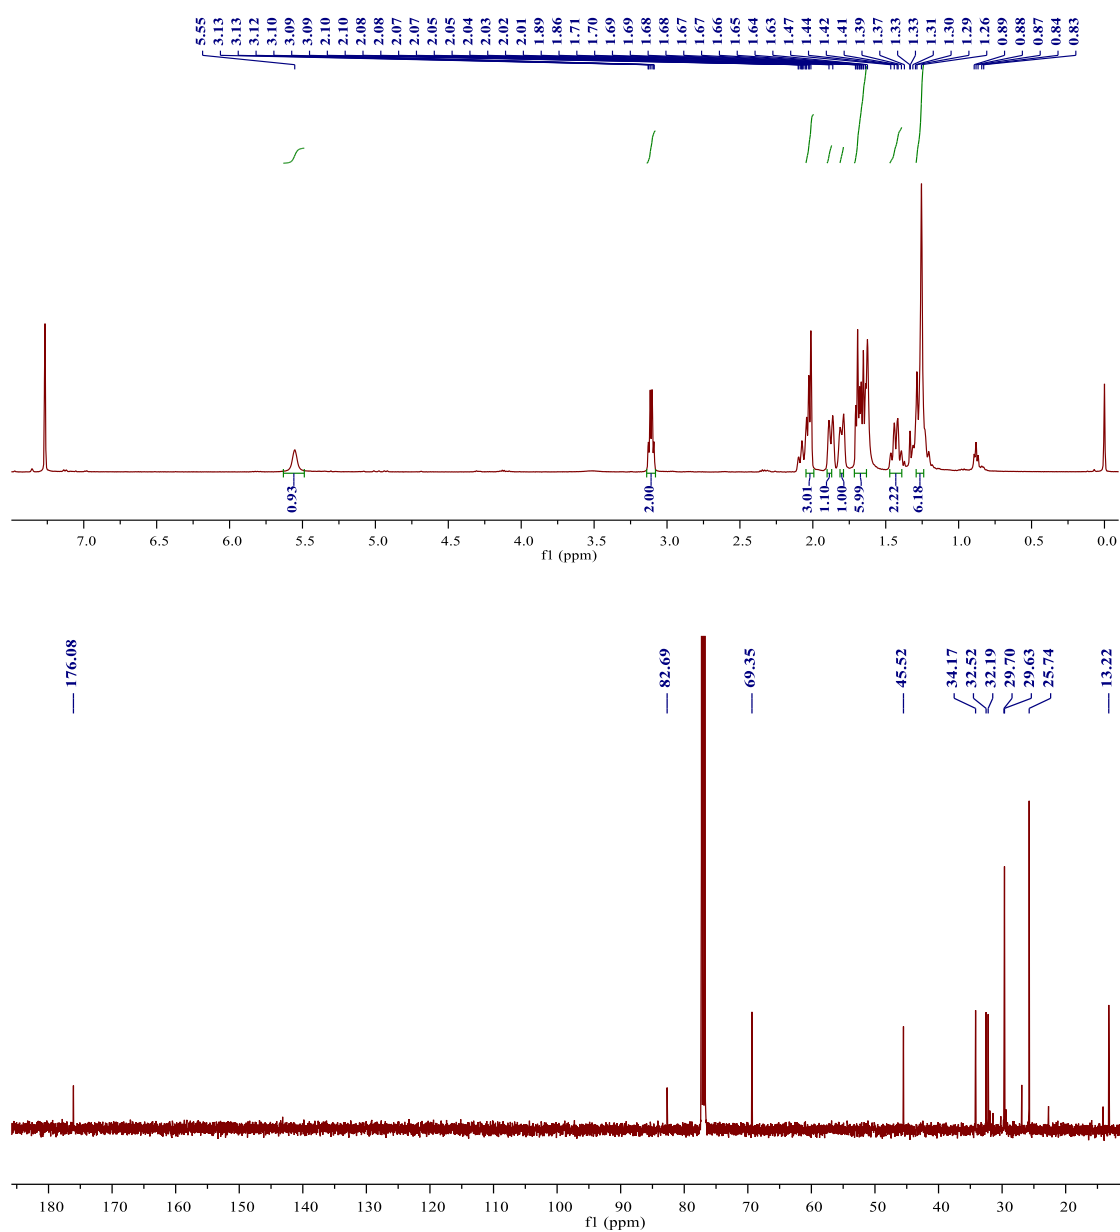

**Fig. S2**  $^1\text{H}$ -NMR and  $^{13}\text{C}$ -NMR data of Dead-Dayne.

## 2. Biological experiments

### 2.1 Labeling of purified porcine brain tubulin

Purified porcine brain tubulin (Cytoskeleton, Inc.) was diluted to a final concentration of 0.1 mg/mL in PBS and incubated with probes as indicated for 30 minutes at room temperature. Samples were transferred to 96-well plate in a same line and irradiated with UV (365 nm, 8 Watt) on ice for 20 minutes. Each of 20  $\mu$ L protein samples were transferred to 0.6 mL tube and added with 1% SDS and fresh prepared 0.25  $\mu$ L each of TAMRA- $N_3$  (10 mM stock in DMSO, Lumiprobe),  $CuSO_4$  (100 mM stock in  $H_2O$ , Sigma), THPTA (Tris(3-hydroxypropyltriazolylmethyl)amine, 10 mM stock in  $H_2O$ , Sigma) and sodium ascorbate (100 mM stock in  $H_2O$ ). The samples were incubated at room temperature for 1 h and the reaction was quenched by boiling in 5  $\mu$ L of SDS-PAGE loading buffer. 20  $\mu$ L of each sample was applied to SDS-PAGE and detected by FUJIFILM FLA 9000 plus DAGE fluorescence scanner. Finally the gel was visualized by coomassie blue staining.

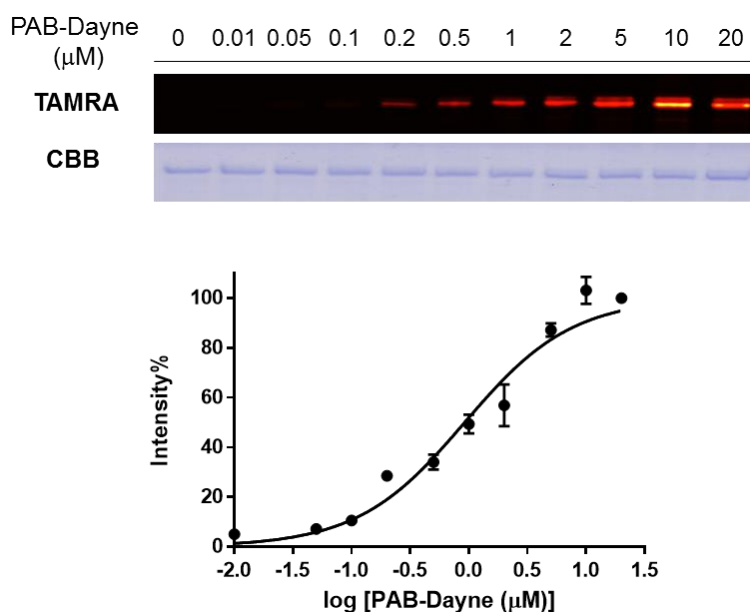

**Fig. S3** Dose-dependent labeling of tubulin by PAB-Dayne.

### 2.2 Cell proliferation assay

Human cervical carcinoma HeLa cell line was grown in DMEM (Dulbecco's Modified Eagle Medium, Gibco) supplemented with 1% L-Glutamine, 1% Penicillin-Streptomycin and 10% Fetal Bovine Serum (FBS, Gibco). The culture incubator set is 37  $^{\circ}C$  with 5%  $CO_2$ . HeLa cells cultured for three passages were diluted in respective culture medium to 8000 cells/mL. 100  $\mu$ L of cell suspension were seeded to each well of 96-well plate and incubated at 37  $^{\circ}C$  overnight. Various concentrations of compounds (PAB, PAB-Dayne, and Dead-Dayne) were dissolved in culture medium containing 0.5% DMSO. Cells in 96-well plate were treated with 100  $\mu$ L of various concentrations of compounds and DMSO (negative control) for 48 hours in a 37  $^{\circ}C$  incubator. Cell viability was assessed by CellTiter-Glo $^{\circ}$  Luminescent Kit (Promega).

**Table S1.** IC<sub>50</sub> values of PAB and probes towards HeLa cells.

| Compound   | IC <sub>50</sub> (μM) |
|------------|-----------------------|
| PAB        | 0.35 ± 0.03           |
| PAB-Dayne  | 1.17 ± 0.06           |
| Dead-Dayne | > 100                 |

### 2.3 Gel-based affinity-based protein profiling in HeLa cells

HeLa cells were grown in culture medium until 90% confluence. The medium was removed and cells were incubated respectively with Dead-Dayne (10 μM), PAB-Dayne (10 μM), and PAB-Dayne (10 μM) with excess PAB (50 μM) for 3 hours. The medium was aspirated, and cells were washed three times with ice-cold PBS to remove the excessive probe followed by UV irradiation (365 nm, 8 watt) for 20 min on ice. The cells were harvested by scraping the cells in ice-cold lysis buffer (50 mM HEPES pH 8.0, 150 mM NaCl, 0.1 mM EDTA, 0.1% Triton X-100 and complete protease inhibitors). The lysed cells were centrifuged at 14000 g for 5 minutes and the soluble fractions were diluted to 2 mg/mL with lysis buffer. 1% SDS (w/v) was added to each sample and click reaction was performed as below: for each reaction, 20 μL of protein samples were added to freshly prepared 0.25 μL each of TAMRA-N<sub>3</sub> (10 mM), CuSO<sub>4</sub> (100 mM), THPTA (10 mM) and NaVc (100 mM). The samples were incubated at room temperature for 1 hour, added with sample loading buffer, applied to SDS-PAGE and imaged by FUJIFILM FLA 9000 plus DAGE fluorescence scanner.

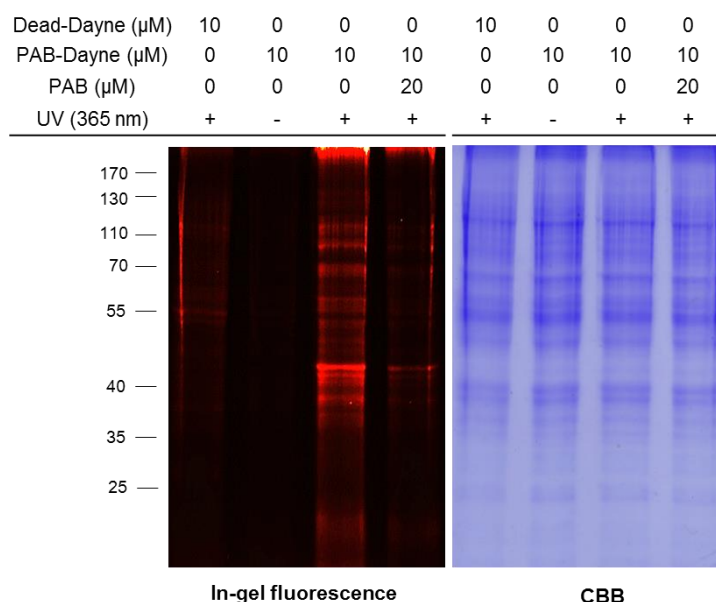**Fig. S5** Full imaging of gels in Fig. 2A.

### 2.4 Microscopy

HeLa cells were seeded on coverslips in a 6-well plate (Corning) and grown until 70% confluence. Cells were incubated with 10  $\mu$ M of PAB-Dayne/Dead-Dayne in 2.0 mL of fresh DMEM growth medium for 3 hours. The medium was aspirated, and cells were washed with ice-cold PBS three times to remove the excessive probe, followed by UV irradiation (365 nm, 8 watt) for 20 min on ice. Next, the cells were fixed with 3.7% paraformaldehyde in PBS for 30 min at room temperature. After washing with PBS twice, the cells were permeabilized with 0.1% Triton X-100 in PBS for 10 min at room temperature. Cells were then washed twice with PBS again and blocked with 3% BSA in PBS (with 0.05% Tween-20) for 30 min at room temperature, and washed twice with PBS. The cells were then treated with a freshly prepared click chemistry reaction cocktail containing of TAMRA-N<sub>3</sub> (100  $\mu$ M final concentration), THPTA (100  $\mu$ M final concentration), NaVc (1.0 mM final concentration), and CuSO<sub>4</sub> (1.0 mM final concentration), in 1.0 mL PBS for 2 h at room temperature. The cells were then washed with PBS (0.05% Tween-20 and 0.5 mM of EDTA) for 3 times, and with PBS twice with gentle agitation. Cells were washed twice with PBS and treated with 10  $\mu$ g/mL of 4',6-diamidino-2-phenylindole dihydrochloride (DAPI, Invitrogen) dissolved in PBS for 15 min at room temperature, followed by imaging with Leica TSC SP8 STED 3X fluorescence microscope.

## 2.5 Mass spectrometry-based ABPP in HeLa cells

The probe incubation and proteome preparation procedures were same as that of labeling studies mentioned above in section 2.3. The proteomics experiment was carried out in biological duplicates. Each of 500  $\mu$ L of proteome sample was subjected to click reaction with Biotin-N<sub>3</sub> (500  $\mu$ M, Biomatrix Inc.), CuSO<sub>4</sub> (1.0 mM), THPTA (100  $\mu$ M) and NaVc (1.0 mM). The samples were precipitated with CH<sub>3</sub>OH (600  $\mu$ L) / CHCl<sub>3</sub> (150  $\mu$ L) / H<sub>2</sub>O (300  $\mu$ L) sequentially and vortexed for a while. After centrifuge at 14,000 g for 3 minutes, the protein disk was washed twice with CH<sub>3</sub>OH (500  $\mu$ L), air-dried and re-dissolved in 200  $\mu$ L of click buffer (50 mM HEPES pH 8.0, 1% SDS) by sonication. 50  $\mu$ L of streptavidin-sepharose (GE Healthcare) beads were added to each sample and incubated at room temperature with continuous rotation for 1 hour. The beads were washed with PBS with 1% SDS (w/v) three times, PBS with 0.5 M NaCl three times, 4.0 M Urea in 100 mM triethylammonium bicarbonate (TEAB) twice, and 100 mM TEAB five times. Each wash was performed on a rotator for 15 minutes. The bounded proteins were subjected to on-beads reductive alkylation with 200  $\mu$ L of 10 mM of tris(2-carboxyethyl)phosphine (TCEP) at 56 °C for 30 minutes and 200  $\mu$ L of 55 mM iodoacetamide at 37 °C in dark for another 30 minutes, followed by wash with 100 mM TEAB three times. Bounded proteins on beads were digested with 0.25  $\mu$ g of sequencing grade modified trypsin (Promega) reconstituted in 50  $\mu$ L of 100 mM TEAB overnight at 37 °C. The digests of both Dead-Dayne and PAB-Dayne treated-samples were labeled with TMT<sup>2</sup>-126 and TMT<sup>2</sup>-127 Isobaric Label Reagent (Thermo Scientific) respectively, according to the manufacturer's procedures. The labeled peptides were desalted by Pierce C18 spin columns and evaporated to dryness on a SpeedVac. Dried peptides were resuspended in 10  $\mu$ L of ddH<sub>2</sub>O containing 0.1% formic acid with sonication. A volume of 1.0  $\mu$ L of each sample was desalted by loading on a Thermo C18 PepMap100 precolumn (300  $\mu$ M  $\times$  5 mm) and eluted on a Thermo Acclaim PepMap RSLC analytical column (75  $\mu$ M  $\times$  15 cm). Mobile phase A (0.1% formic acid in H<sub>2</sub>O) and mobile phase B (0.1% formic acid in acetonitrile) were used to establish the 80 min gradient comprised of



55 min of 4–30% B, 7 min of 30–50% B, and 5 min of 50–90% B, followed by re-equilibrating at 4% B for 8 min. The flow rate was 0.3  $\mu$ L/min. Peptides were then analyzed on Thermo Orbitrap Fusion Lumos proteomic mass spectrometer (Thermo Scientific) in a data-dependent manner, with automatic switching between MS and MS/MS scans using a cycle time 3 s. MS spectra were acquired at a resolution of 120,000 with AGC target value of  $4 \times 10^5$  ions or a maximum integration time of 50 ms. The scan range was limited from 375 to 1500 m/z. Peptide fragmentation was performed via high energy collision dissociation (HCD) with the energy set at 38 NCE. The MS/MS spectra were acquired at a resolution of 50,000 with AGC target value of  $1 \times 10^5$  ions or a maximum integration time of  $10^5$  ms. The fixed first m/z was 120, and the isolation window was 0.7 m/z.

Protein identification and quantification were performed using Proteome Discoverer 2.1 software (Thermo Scientific). Peptide sequences (and hence protein identity) were determined by matching Uniprot protein databases with the acquired fragmentation pattern by SEQUEST HT algorithm. The precursor mass tolerance was set to 10 ppm and fragment ion mass tolerance to 0.02 Da. One missed cleavage site of trypsin was allowed. Carbamidomethyl (C) and TMT-duplex (K and N-terminal) were used as a fixed modification. Oxidation (M) was used as variable modifications. All spectra were searched against protein database using a target false discovery rate (FDR) of 1%. The proteins identified in positive group (PAB-Dayne-treated samples) were additionally filtered by at least two spectral counts and one unique peptides in each experimental replicate. Protein ratios were calculated as the median of all peptide hits belonging to a protein. Statistical analysis was performed with Perseus 1.5.1.6. TMT ratios obtained from Proteome Discoverer 2.1 were transformed with  $\log_2(x)$  and then normalized using Z-score and  $-\log_{10}(p\text{-value})$  were obtained by a two sided one sample t-test over three biological replicates. Only proteins identified have ratios higher than 4.0 and  $p$ -values less than 0.05 were considered statistical significant targets. The raw data and database search results were deposited to the ProteomeXchange Consortium *via* the PRIDE partner repository with the dataset identifier PXD006423.

## 2.6 Target validation by pull-down and western blot

Primary antibodies of human CD147 was ordered from Abcam. Primary antibodies of human CD98 was purchased from Sangon Biotech. Bound proteins on streptavidin beads from pull-down experiments as described in 2.5 were eluted by boiling in SDS-PAGE sample loading buffer for 15 minutes and separated by SDS-PAGE. Then the proteins were transferred onto nitrocellulose membrane (Millipore) and the membrane was blocked with 3% (w/v) BSA in tris-buffered saline (TBS) for 2 hours at room temperature. After blocking, membranes were incubated with respective primary antibodies (*anti*-CD147 or *anti*-CD98) at room temperature for one hour. After washing with TBST (TBS containing 0.1% Tween-20) three times, blots were further incubated with the HRP-conjugated anti-rabbit (Sangon Biotech) secondary antibody for 1 hour at room temperature. After incubation, the blot was washed again with TBST three times and developed by enhanced ECL chemiluminescent substrate kit (Pierce).

## 2.7 Labeling of recombinant CD147/CD98 proteins

Recombinant GST-tagged CD147 (ProteinTech) and His-tagged CD98 (Sinobiological, Inc.)

proteins, either along or mixed together, were diluted to a final concentration of 0.1 mg/mL in PBS and incubated with probes as indicated for 30 minutes at room temperature. Samples were transferred to 96-well plate in a same line and irradiated with UV (365 nm, 8 Watt) on ice for 20 minutes. The subsequent click reaction and in-gel fluorescence scan were performed same as above.

## *2.8 Disruption of CD147 oligomerization by PAB*

Each of 100 ng of recombinant GST-tagged CD147 proteins (ProteinTech) reconstituted in PBS was incubated with DMSO or increasing concentrations of PAB (0.1  $\mu$ M, 1  $\mu$ M, 5  $\mu$ M, and 10  $\mu$ M) at room temperature for 1 hour. Then all samples were mixed with 4 $\times$  Laemmli sample buffer lacking SDS and followed by resolution by 4-12% gradient SDS-PAGE without boiling. Western blot with anti-CD147 antibody was performed to examine the oligomerization of CD147 proteins.

## *2.9 Binding site identification*

5  $\mu$ g of recombinant GST-tagged CD147 protein (ProteinTech) in PBS (20  $\mu$ L) were incubated with 10  $\mu$ M of PAB-Dayne at room temperature for 1 hour, followed by UV irradiation (365 nm, 8 watt) for 20 min on ice. Buffer exchange (to 50 mM of  $\text{NH}_4\text{HCO}_3$ ), chemical modification (reduction with 20 mM DTT and alkylation with 50 mM iodoacetamide) were performed according to filter-aided sample preparation (FASP) protocol in the upper chamber of 10-kDa ultrafiltration device. Then, 0.25  $\mu$ g of trypsin (Thermo Scientific) was add to the sample and incubated at 37  $^\circ\text{C}$  overnight. The digests were desalted by Ziptip desalting column (Pierce) and evaporated to dryness on a SpeedVac. The dried peptides were resuspended in 8  $\mu$ L ddH<sub>2</sub>O containing 0.1% formic acid with sonication and analyzed by Thermo Orbitrap Fusion Lumos proteomic mass spectrometer as mentioned above. Data processing was performed using Proteome Discoverer 2.1 software (Thermo Scientific) and peptide sequences were determined by matching protein database with the acquired fragmentation pattern by SEQUEST HT algorithm. The precursor mass tolerance was set to 10 ppm and fragment ion mass tolerance to 0.02 Da. One missed cleavage site of trypsin was allowed. PAB-Dayne (any amino acids), Carbamidomethyl (C), Oxidation (M), were used as variable modifications. All spectra were searched against protein sequence of human CD147 isoform 2 (UniprotKB ID: P35613-2) using a target false discovery rate (FDR) of 1%. Manual verification was performed to ensure confident peptide identification. The raw data and database search results were deposited to the ProteomeXchange Consortium *via* the PRIDE partner repository with the dataset identifier PXD006423.

|             |            |            |            |            |
|-------------|------------|------------|------------|------------|
| 10          | 20         | 30         | 40         | 50         |
| MAAALFVLLG  | FALLGTHGAS | GAAGTVFTTV | EDLGSKILLT | CSLNDSATEV |
| 60          | 70         | 80         | 90         | 100        |
| TGHRWLKGGV  | VLKEDALPGQ | KTEFKVDSDD | QWGEYSCVFL | PEPMGTANIQ |
| 110         | 120        | 130        | 140        | 150        |
| LHGPPRVKAV  | KSSEHINEGE | TAMLVCKSES | VPPVTDWAWY | KITDSEDKAL |
| 160         | 170        | 180        | 190        | 200        |
| MNGSESRRFFV | SSSQGRSELH | IENLNMEADP | GQYRCNGTSS | KGSDQAIITL |
| 210         | 220        | 230        | 240        | 250        |
| RVRSHLAALW  | PFLGIVAEVL | VLVTIIFTYE | KRRKPEDVLD | DDDAGSAPLK |
| 260         | 270        |            |            |            |
| SSGQHQNCKG  | KNVRQRNSS  |            |            |            |

■ Extracellular Ig-C2 domain  
■ Extracellular Ig-V domain  
■ Transmembrane domain  
■ Cytosolic domain

**Fig. S5** Amino acid sequence of human CD147 isoform-2 (UniprotKB ID: P35613-2). V76 and D77 are possible probe-labeled residues.

## 2.10 Western blot analysis of expression level of MMPs upon PAB treatment

Primary antibodies of human MMP-2 was ordered from Abcam. Primary antibodies of human MMP-7, MMP-9 and GAPDH were purchased from Sangon Biotech. HeLa cells were incubated with DMSO or PAB (1  $\mu$ M and 5  $\mu$ M) for 24 h. The cells were washed with PBS, harvested and lysed with SDT lysis buffer (100 mM Tris-HCl pH 7.6, 4% SDS, 0.1 M DTT) at 95 °C for 3 min. The lysates were centrifuged at 14000 g for 5 minutes and the soluble fractions were diluted to 2 mg/mL with lysis buffer. Equal amount of protein samples were separated by SDS-PAGE, transferred onto nitrocellulose membrane (Millipore), and blotted with primary antibodies of *anti-MMP-2*, *anti-MMP-7*, *anti-MMP-9* and *anti-GAPDH* as described in 2.6.

## 2.11 siRNA transfection

HeLa cells were transfected in OPTI-MEM with lipofectamin2000 (Invitrogen) with 100 nM of siRNA of CD147 (5'-GGU UCU UCG UGA GUU CCU CTT-3') or negative control RNA (5'-UUC UCC GAA CGU GUC ACG UTT-3') for 24 hours according to the manufacturer's protocols. The medium was removed and replaced for DMEM containing 10% FBS. Cells were then treated with various concentrations of compounds and DMSO for 24 hours in a 37 °C incubator. Cell viability was assessed by CellTiter-Glo® Luminescent Kit (Promega).

## 2.12 Molecular modeling

Probable binding conformations were carried out using Molecular Operating Environment (MOE 2015.10) software. The CD147 structure was obtained from the Protein Data Bank (PDB ID: 3I85).<sup>[2]</sup> Molecular docking of pseudolaric acid B into the three dimensional X-ray structure of human CD147 protein were carried out using Molecular Operating Environment (MOE) version 2015.10 (Chemical Computing Group Inc., Montreal, QC, Canada). PAB was built using the

builder interface of the MOE program, docked into the Ig-C2 domain of CD147 and subjected to energy minimization using the included Force-field MMFF94x calculations. The macromolecule molecular surface (Figure 3B), ligand interactions and secondary structure (Supporting Information Figure S5) were displayed by MOE.

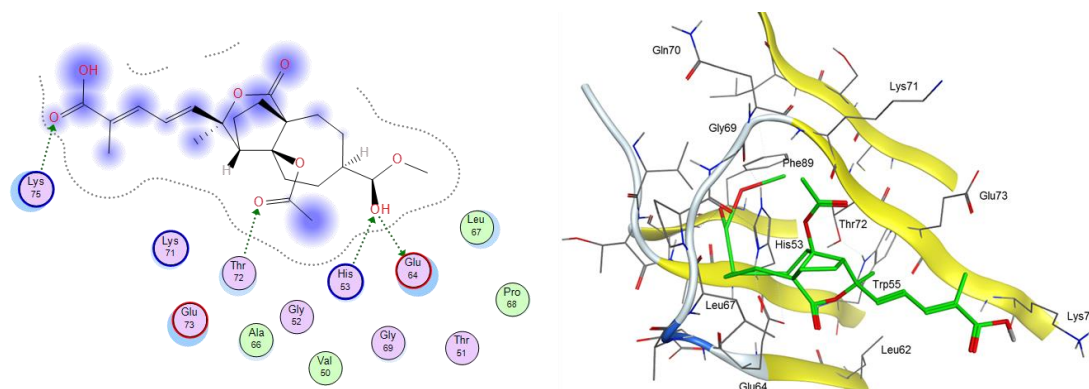

**Fig. S6** Ligand interactions (left) and secondary structure (right) of PAB docked into N-terminal IgC2 domain of CD147 protein.

### 2.13 Global proteomic profiling of PAB-treated HeLa cells

HeLa cells were incubated with DMSO or 1  $\mu$ M of PAB for 24 h. The proteomics experiment was carried out in biological duplicates. Then the cells were washed with PBS, harvested and lysed with SDT lysis buffer (100 mM Tris-HCl pH 7.6, 4% SDS, 0.1 M DTT) at 95  $^{\circ}$ C for 3 min. The cell lysates were centrifuged at 14,000 g for 15 min and the supernatants were collected. Each of 300  $\mu$ g of protein was alkylated with 55 mM of iodoacetamide and subjected to in-solution tryptic digestion utilizing the FASP (filter aided sample preparation) protocol.<sup>[3]</sup> The digests were labeled with respective isobaric label reagents (ITRAQ<sup>8</sup>-119 for DMSO and ITRAQ<sup>8</sup>-121 for PAB). The labeled peptides were combined and fractionated by high-pH reversed-phase chromatography on a 1-mm Xbridge column (Waters), and 10 fractions were collected. Each fraction was evaporated to dryness on a SpeedVac and dried peptides were resuspended in 15  $\mu$ L of ddH<sub>2</sub>O containing 0.1% formic acid with sonication for subsequent MS analysis. A volume of 1  $\mu$ L of each sample was desalted by loading on a Thermo C18 PepMap100 precolumn (300  $\mu$ m  $\times$  5 mm) and eluted on a Thermo Acclaim PepMap RSLC analytical column (75  $\mu$ m  $\times$  15 cm). Mobile phase A (0.1% formic acid in H<sub>2</sub>O) and mobile phase B (0.1% formic acid in acetonitrile) were used to establish the 120 min gradient comprised of 85 min of 4–30% B, 15 min of 30–50% B, and 5 min of 90% B, followed by re-equilibrating at 4% B for 15 min. The flow rate was 0.3  $\mu$ L/min. Peptides were then analyzed on Thermo Orbitrap Fusion Lumos proteomic mass spectrometer (Thermo Scientific) in a data-dependent manner, with automatic switching between MS and MS/MS scans using a cycle time 3 s. MS spectra were acquired at a resolution of 120,000 with AGC target value of  $4 \times 10^5$  ions or a maximum integration time of 50 ms. The scan range was limited from 375 to 1500 m/z. Peptide fragmentation was performed via high energy collision dissociation (HCD) with the energy set at 38 NCE. The MS/MS spectra were acquired at a resolution of 50,000 with AGC target value of  $1 \times 10^5$  ions or a maximum integration time of 105 ms. The fixed first m/z was 120, and the isolation window was 0.7 m/z.

Protein identification and quantification were performed using Proteome Discoverer 2.1 software

(Thermo Scientific). Peptide sequences (and hence protein identity) were determined by matching Uniprot protein databases with the acquired fragmentation pattern by SEQUEST HT algorithm. The precursor mass tolerance was set to 10 ppm and fragment ion mass tolerance to 0.02 Da. One missed cleavage site of trypsin was allowed. Carbamidomethyl (C) and ITRAQ-8plex (K, Y and N-terminal) were used as a fixed modification. Oxidation (M) was used as variable modifications. All spectra were searched against protein database using a target false discovery rate (FDR) of 1%. The proteins identified in both channels were additionally filtered by at least two spectral counts and one unique peptides in each experimental replicate. Protein ratios were calculated as the median of peptide with S/N ratio higher than 10 of a protein. Statistical analysis was performed with Perseus 1.5.1.6. Isobaric ratios obtained from Proteome Discoverer 2.1 were transformed with  $\log_2(x)$  and then normalized using Z-score and  $-\log_{10}(p\text{-value})$  were obtained by a two sided one sample t-test over biological duplicates. Only proteins identified have normalized ratios higher than 3.0 and  $p$ -values less than 0.05 were considered statistical significant hits.

**Fig. S7** Gene Ontology (GO) biological processes analysis of over- and under-expressed proteins of HeLa cells upon PAB treatment

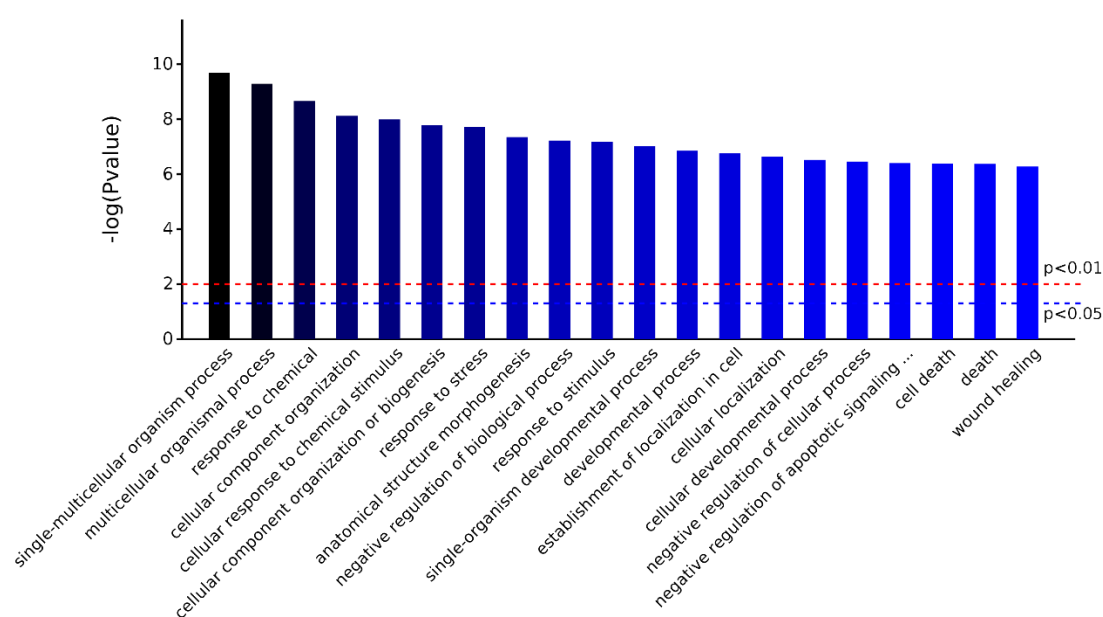

**Table S2** Significantly up- (red) and down-regulated (blue) proteins by PAB treatment.

| <i>ID</i> | <i>Protein</i>  | <i>Ratio</i> | <i>p-value</i> | <i>Go Molecular Function</i>                                                                                                                                                                                  | <i>GO Biological Process</i>                                                                                                                                                                                                                                           |
|-----------|-----------------|--------------|----------------|---------------------------------------------------------------------------------------------------------------------------------------------------------------------------------------------------------------|------------------------------------------------------------------------------------------------------------------------------------------------------------------------------------------------------------------------------------------------------------------------|
| O00622    | <b>CYR61</b>    | <b>11.86</b> | 0.046          | receptor-binding, growth factor                                                                                                                                                                               | cell adhesion, cell death, cell-cell signaling, regulation of biological process, response to stimulus, signal transduction                                                                                                                                            |
| P05121    | <b>SERPINE1</b> | <b>6.11</b>  | 0.008          | serine-type endopeptidase inhibitor activity, serine-type peptidase activity                                                                                                                                  | regulation of biological process                                                                                                                                                                                                                                       |
| P08195    | <b>OSMR</b>     | <b>6.11</b>  | 0.001          | cytokine activity, defense/immunity protein                                                                                                                                                                   | B cell mediated immunity, hemopoiesis, nervous system development                                                                                                                                                                                                      |
| P31431    | <b>SDC4</b>     | <b>4.89</b>  | 0.025          | cell adhesion molecule, cytoskeletal protein, defense/immunity protein, extracellular matrix glycoprotein, membrane-bound signaling molecule                                                                  | cellular component movement, localization, locomotion                                                                                                                                                                                                                  |
| Q9BZH6    | <b>WDR11</b>    | <b>3.93</b>  | 0.034          | N/A                                                                                                                                                                                                           | N/A                                                                                                                                                                                                                                                                    |
| Q9Y696    | <b>CLIC4</b>    | <b>3.76</b>  | 0.003          | anion channel activity, transferase activity, cytoskeletal protein, epimerase/racemase, reductase, signaling molecule, transferase, translation elongation factor                                             | anion transport, cellular amino acid metabolic process, cellular process, nitrogen compound metabolic process, sulfur compound metabolic process                                                                                                                       |
| P04179    | <b>SOD2</b>     | <b>3.83</b>  | 0.036          | oxidoreductase                                                                                                                                                                                                | N/A                                                                                                                                                                                                                                                                    |
| P53814    | <b>SMTN</b>     | <b>3.24</b>  | 0.022          | actin binding, structural constituent of muscle                                                                                                                                                               | muscle organ development, smooth muscle contraction                                                                                                                                                                                                                    |
| P09884    | <b>POLA1</b>    | <b>2.86</b>  | 0.029          | 3'-5' exonuclease activity, 4 Fe-4 S cluster binding, chromatin binding, DNA binding, DNA-directed DNA polymerase activity, metal ion binding, nucleoside binding, nucleotide binding, protein kinase binding | cell proliferation, DNA replication, G1/S transition of mitotic cell cycle, lagging strand elongation, leading strand elongation, regulation of transcription involved in G1/S transition of mitotic cell cycle, telomere maintenance via recombination, viral process |
| Q9BY77    | <b>POLDIP3</b>  | <b>2.81</b>  | 0.031          | RNA binding                                                                                                                                                                                                   | mRNA 3'-end processing, mRNA export from nucleus, positive regulation of translation, RNA export from nucleus, termination of RNA polymerase II transcription                                                                                                          |

| <i>ID</i> | <i>Protein</i> | <i>Ratio</i> | <i>p-value</i> | <i>Go Molecular Function</i>                                                                                                                                                                                                                                   | <i>GO Biological Process</i>                                                                                                                                                                                                        |
|-----------|----------------|--------------|----------------|----------------------------------------------------------------------------------------------------------------------------------------------------------------------------------------------------------------------------------------------------------------|-------------------------------------------------------------------------------------------------------------------------------------------------------------------------------------------------------------------------------------|
| P17676    | <b>CEBPB</b>   | <b>-2.21</b> | 0.047          | chromatin binding, DNA binding, protein binding, protein hetero-dimerization activity, transcriptional activator activity                                                                                                                                      | cellular response to chemicals, immune response, inflammatory response, regulation of transcription, response to endoplasmic reticulum stress                                                                                       |
| Q9BRA2    | <b>TXNDC17</b> | <b>-2.36</b> | 0.020          | peroxidase activity, protein-disulfide reductase activity                                                                                                                                                                                                      | tumor necrosis factor-mediated signaling pathway                                                                                                                                                                                    |
| P68366    | <b>TUBA4A</b>  | <b>-2.92</b> | 0.013          | enzyme binding, GTPase activity, GTP binding, structural constituent of cytoskeleton                                                                                                                                                                           | ciliary basal body docking, G2/M transition of mitotic cell cycle, microtubule-based process, platelet degranulation                                                                                                                |
| Q9NQC3    | <b>RTN4</b>    | <b>-3.12</b> | 0.014          | membrane traffic protein                                                                                                                                                                                                                                       | cell differentiation, cell recognition, cellular component morphogenesis, nervous system development                                                                                                                                |
| P47914    | <b>RPL29</b>   | <b>-3.08</b> | 0.004          | structural constituent of ribosome                                                                                                                                                                                                                             | biosynthetic process, cellular process, translation                                                                                                                                                                                 |
| P07437    | <b>TUBB</b>    | <b>-3.28</b> | 0.023          | GTPase activating protein binding, GTPase activity, GTP binding, MHC class I protein binding, protein complex binding, protein domain specific binding, structural constituent of cytoskeleton, structural molecule activity, ubiquitin protein ligase binding | cell division, cellular process, G2/M transition of mitotic cell cycle, microtubule-based process, movement of cell or subcellular component, natural killer cell mediated cytotoxicity, neutrophil degranulation, spindle assembly |
| Q9BQE3    | <b>TUBA1C</b>  | <b>-3.01</b> | 0.038          | GTP binding, structural constituent of cytoskeleton, structural molecule activity                                                                                                                                                                              | cell division, cytoskeleton-dependent intracellular transport, microtubule-based process                                                                                                                                            |
| O95197    | <b>RTN3</b>    | <b>-3.15</b> | 0.017          | membrane traffic protein                                                                                                                                                                                                                                       | endoplasmic reticulum tubular network formation, apoptotic process, vesicle-mediated transport                                                                                                                                      |
| P55039    | <b>DRG2</b>    | <b>-3.36</b> | 0.011          | GTP binding                                                                                                                                                                                                                                                    | signal transduction                                                                                                                                                                                                                 |
| Q9BV73    | <b>CEP250</b>  | <b>-4.71</b> | 0.035          | kinase modulator, protein binding                                                                                                                                                                                                                              | G2/M transition of mitotic cell cycle, protein localization                                                                                                                                                                         |

### 3. Quantitative data of proteomic studies

**Table S3** Proteins identified from the pull-down/LC-MS experiments.

| Accession | Description                                                                                  | Log <sub>2</sub> (PAB-Dayne/Dead-Dayne) |      |      |      | -Log <sub>10</sub> (p-value) | Significance |
|-----------|----------------------------------------------------------------------------------------------|-----------------------------------------|------|------|------|------------------------------|--------------|
|           |                                                                                              | 1#                                      | 2#   | 3#   | Avg. |                              |              |
| P35613    | Basigin OS=Homo sapiens GN=BSG PE=1 SV=2                                                     | 2.28                                    | 3.35 | 2.67 | 2.77 | 1.90                         | +            |
| P21796    | Voltage-dependent anion-selective channel protein 1 OS=Homo sapiens GN=VDAC1 PE=1 SV=2       | 2.88                                    | 2.77 | 2.55 | 2.73 | 2.92                         | +            |
| P08195    | 4F2 cell-surface antigen heavy chain OS=Homo sapiens GN=SLC3A2 PE=1 SV=3                     | 3.19                                    | 1.92 | 2.73 | 2.61 | 1.70                         | +            |
| P45880    | Voltage-dependent anion-selective channel protein 2 OS=Homo sapiens GN=VDAC2 PE=1 SV=2       | 2.48                                    | 2.49 | 2.76 | 2.58 | 2.91                         | +            |
| P07437    | Tubulin beta chain OS=Homo sapiens GN=TUBB PE=1 SV=2                                         | 1.83                                    | 1.45 | 1.86 | 1.71 | 2.23                         | +            |
| P55060    | Exportin-2 OS=Homo sapiens GN=CSE1L PE=1 SV=3                                                | 1.54                                    | 1.48 | 1.83 | 1.62 | 2.35                         | +            |
| Q92973    | Transportin-1 OS=Homo sapiens GN=TNPO1 PE=1 SV=2                                             | 1.56                                    | 1.65 | 1.48 | 1.57 | 3.00                         | +            |
| P08238    | Heat shock protein HSP 90-beta OS=Homo sapiens GN=HSP90AB1 PE=1 SV=4                         | 1.24                                    | 1.29 | 1.85 | 1.46 | 1.77                         | +            |
| P68371    | Tubulin beta-4B chain OS=Homo sapiens GN=TUBB4B PE=1 SV=1                                    | 1.29                                    | 1.34 | 1.72 | 1.45 | 2.07                         | +            |
| O95373    | Importin-7 OS=Homo sapiens GN=IPO7 PE=1 SV=1                                                 | 1.02                                    | 1.54 | 1.64 | 1.40 | 1.74                         | +            |
| O14980    | Exportin-1 OS=Homo sapiens GN=XPO1 PE=1 SV=1                                                 | 1.30                                    | 1.36 | 1.48 | 1.38 | 2.85                         | +            |
| P78527    | DNA-dependent protein kinase catalytic subunit OS=Homo sapiens GN=PRKDC PE=1 SV=3            | 1.13                                    | 1.49 | 1.51 | 1.38 | 2.11                         | +            |
| O60313    | Dynamin-like 120 kDa protein, mitochondrial OS=Homo sapiens GN=OPA1 PE=1 SV=3                | 1.56                                    | 1.53 | 0.97 | 1.35 | 1.72                         | +            |
| Q7L1Q6    | Basic leucine zipper and W2 domain-containing protein 1 OS=Homo sapiens GN=BZW1 PE=1 SV=1    | 0.76                                    | 2.58 | 0.66 | 1.34 | 0.78                         |              |
| Q71U36    | Tubulin alpha-1A chain OS=Homo sapiens GN=TUBA1A PE=1 SV=1                                   | -0.27                                   | 1.98 | 2.29 | 1.33 | 0.62                         |              |
| P05141    | ADP/ATP translocase 2 OS=Homo sapiens GN=SLC25A5 PE=1 SV=7                                   | 1.37                                    | 1.61 | 0.91 | 1.30 | 1.62                         | +            |
| Q9Y6E2    | Basic leucine zipper and W2 domain-containing protein 2 OS=Homo sapiens GN=BZW2 PE=1 SV=1    | 1.06                                    | 1.54 | 1.16 | 1.25 | 1.86                         | +            |
| Q8NFJ5    | Retinoic acid-induced protein 3 OS=Homo sapiens GN=GPRC5A PE=1 SV=2                          | 0.96                                    | 0.21 | 2.58 | 1.25 | 0.67                         |              |
| P68104    | Elongation factor 1-alpha 1 OS=Homo sapiens GN=EEF1A1 PE=1 SV=1                              | 1.19                                    | 1.21 | 1.24 | 1.21 | 3.80                         | +            |
| P42704    | Leucine-rich PPR motif-containing protein, mitochondrial OS=Homo sapiens GN=LRPPRC PE=1 SV=3 | 1.02                                    | 1.40 | 1.20 | 1.20 | 2.09                         | +            |
| P27635    | 60S ribosomal protein L10 OS=Homo sapiens GN=RPL10 PE=1 SV=4                                 | 0.69                                    | 1.70 | 1.15 | 1.18 | 1.25                         |              |
| P05023    | Sodium/potassium-transporting ATPase subunit alpha-1 OS=Homo sapiens GN=ATP1A1 PE=1 SV=1     | 1.11                                    | 1.29 | 1.02 | 1.14 | 2.30                         | +            |
| P27348    | 14-3-3 protein theta OS=Homo sapiens GN=YWHAQ PE=1 SV=1                                      | 1.35                                    | 1.36 | 0.56 | 1.09 | 1.27                         |              |



|        |                                                                                           |      |       |       |      |      |   |
|--------|-------------------------------------------------------------------------------------------|------|-------|-------|------|------|---|
| P68366 | Tubulin alpha-4A chain OS=Homo sapiens GN=TUBA4A PE=1 SV=1                                | 1.08 | 2.01  | 0.17  | 1.09 | 0.75 |   |
| P53618 | Coatomer subunit beta OS=Homo sapiens GN=COPB1 PE=1 SV=3                                  | 0.90 | 1.21  | 1.05  | 1.06 | 2.16 | + |
| O00410 | Importin-5 OS=Homo sapiens GN=IPO5 PE=1 SV=4                                              | 1.12 | 1.02  | 0.91  | 1.02 | 2.47 | + |
| P31943 | Heterogeneous nuclear ribonucleoprotein H OS=Homo sapiens GN=HNRNPH1 PE=1 SV=4            | 1.49 | 0.96  | 0.51  | 0.99 | 1.13 |   |
| P60709 | Actin, cytoplasmic 1 OS=Homo sapiens GN=ACTB PE=1 SV=1                                    | 0.71 | 1.30  | 0.94  | 0.98 | 1.54 | + |
| O75533 | Splicing factor 3B subunit 1 OS=Homo sapiens GN=SF3B1 PE=1 SV=3                           | 0.86 | 0.81  | 0.93  | 0.86 | 2.78 | + |
| Q9HAV4 | Exportin-5 OS=Homo sapiens GN=XPO5 PE=1 SV=1                                              | 0.86 | 1.01  | 0.53  | 0.80 | 1.52 | + |
| P41252 | Isoleucine--tRNA ligase, cytoplasmic OS=Homo sapiens GN=IARS PE=1 SV=2                    | 0.96 | 0.62  | 0.78  | 0.79 | 1.82 | + |
| Q9BQE3 | Tubulin alpha-1C chain OS=Homo sapiens GN=TUBA1C PE=1 SV=1                                | 2.37 | 0.43  | -0.48 | 0.77 | 0.34 |   |
| P12956 | X-ray repair cross-complementing protein 6 OS=Homo sapiens GN=XRCC6 PE=1 SV=2             | 0.95 | 0.24  | 1.07  | 0.75 | 0.99 |   |
| P53621 | Coatomer subunit alpha OS=Homo sapiens GN=COPA PE=1 SV=2                                  | 1.03 | 0.33  | 0.87  | 0.74 | 1.13 |   |
| P62979 | Ubiquitin-40S ribosomal protein S27a OS=Homo sapiens GN=RPS27A PE=1 SV=2                  | 0.80 | 0.56  | 0.76  | 0.71 | 1.96 | + |
| P16615 | Sarcoplasmic/endoplasmic reticulum calcium ATPase 2 OS=Homo sapiens GN=ATP2A2 PE=1 SV=1   | 0.63 | 0.89  | 0.60  | 0.71 | 1.79 | + |
| P07814 | Bifunctional glutamate/proline--tRNA ligase OS=Homo sapiens GN=EPRS PE=1 SV=5             | 0.56 | 1.08  | 0.47  | 0.70 | 1.18 |   |
| Q9Y3U8 | 60S ribosomal protein L36 OS=Homo sapiens GN=RPL36 PE=1 SV=3                              | 1.30 | -0.31 | 1.09  | 0.69 | 0.52 |   |
| P00966 | Argininosuccinate synthase OS=Homo sapiens GN=ASS1 PE=1 SV=2                              | 0.86 | 0.72  | 0.48  | 0.69 | 1.60 | + |
| P25705 | ATP synthase subunit alpha, mitochondrial OS=Homo sapiens GN=ATP5A1 PE=1 SV=1             | 0.14 | 1.02  | 0.88  | 0.68 | 0.89 |   |
| P17987 | T-complex protein 1 subunit alpha OS=Homo sapiens GN=TCP1 PE=1 SV=1                       | 0.46 | 0.70  | 0.85  | 0.67 | 1.55 | + |
| Q14204 | Cytoplasmic dynein 1 heavy chain 1 OS=Homo sapiens GN=DYNC1H1 PE=1 SV=5                   | 0.77 | 0.58  | 0.54  | 0.63 | 1.91 | + |
| P10809 | 60 kDa heat shock protein, mitochondrial OS=Homo sapiens GN=HSPD1 PE=1 SV=2               | 0.56 | 0.64  | 0.66  | 0.62 | 2.64 | + |
| Q01650 | Large neutral amino acids transporter small subunit 1 OS=Homo sapiens GN=SLC7A5 PE=1 SV=2 | 0.96 | 0.58  | 0.32  | 0.62 | 1.09 |   |
| Q93008 | Probable ubiquitin carboxyl-terminal hydrolase FAF-X OS=Homo sapiens GN=USP9X PE=1 SV=3   | 0.70 | 0.25  | 0.86  | 0.60 | 1.09 |   |
| Q14974 | Importin subunit beta-1 OS=Homo sapiens GN=KPMB1 PE=1 SV=2                                | 0.46 | 0.64  | 0.68  | 0.59 | 1.91 | + |
| Q8N1F7 | Nuclear pore complex protein Nup93 OS=Homo sapiens GN=NUP93 PE=1 SV=2                     | 0.53 | 1.01  | 0.22  | 0.59 | 0.90 |   |
| P57678 | Gem-associated protein 4 OS=Homo sapiens GN=GEMIN4 PE=1 SV=2                              | 0.48 | 0.95  | 0.32  | 0.58 | 1.04 |   |
| Q86VP6 | Cullin-associated NEDD8-dissociated protein 1 OS=Homo sapiens GN=CAND1 PE=1 SV=2          | 0.32 | 1.04  | 0.38  | 0.58 | 0.89 |   |
| Q92616 | eIF-2-alpha kinase activator GCN1 OS=Homo sapiens GN=GCN1 PE=1 SV=6                       | 0.68 | 0.60  | 0.39  | 0.56 | 1.63 | + |
| P52292 | Importin subunit alpha-1 OS=Homo sapiens GN=KPNA2 PE=1 SV=1                               | 0.67 | 1.08  | -0.08 | 0.56 | 0.62 |   |

|        |                                                                                        |       |       |       |      |      |   |
|--------|----------------------------------------------------------------------------------------|-------|-------|-------|------|------|---|
| Q5T4S7 | E3 ubiquitin-protein ligase UBR4 OS=Homo sapiens GN=UBR4 PE=1 SV=1                     | 0.43  | 0.77  | 0.39  | 0.53 | 1.32 | + |
| P54136 | Arginine--tRNA ligase, cytoplasmic OS=Homo sapiens GN=RARS PE=1 SV=2                   | 0.56  | 0.61  | 0.33  | 0.50 | 1.54 | + |
| P13639 | Elongation factor 2 OS=Homo sapiens GN=EEF2 PE=1 SV=4                                  | 0.36  | 0.31  | 0.81  | 0.50 | 1.05 |   |
| P00338 | L-lactate dehydrogenase A chain OS=Homo sapiens GN=LDHA PE=1 SV=2                      | 0.18  | 0.71  | 0.56  | 0.48 | 1.03 |   |
| P62829 | 60S ribosomal protein L23 OS=Homo sapiens GN=RPL23 PE=1 SV=1                           | 1.20  | 0.00  | 0.14  | 0.45 | 0.44 |   |
| P04406 | Glyceraldehyde-3-phosphate dehydrogenase OS=Homo sapiens GN=GAPDH PE=1 SV=3            | 0.39  | 0.54  | 0.32  | 0.41 | 1.61 | + |
| Q04637 | Eukaryotic translation initiation factor 4 gamma 1 OS=Homo sapiens GN=EIF4G1 PE=1 SV=4 | 0.98  | 0.25  | 0.01  | 0.41 | 0.53 |   |
| P62258 | 14-3-3 protein epsilon OS=Homo sapiens GN=YWHAE PE=1 SV=1                              | 0.49  | 0.00  | 0.70  | 0.40 | 0.71 |   |
| Q01813 | ATP-dependent 6-phosphofructokinase, platelet type OS=Homo sapiens GN=PFKP PE=1 SV=2   | 0.56  | 0.28  | 0.31  | 0.38 | 1.29 |   |
| Q06830 | Peroxiredoxin-1 OS=Homo sapiens GN=PRDX1 PE=1 SV=1                                     | 0.42  | 0.31  | 0.41  | 0.38 | 2.10 | + |
| P48643 | T-complex protein 1 subunit epsilon OS=Homo sapiens GN=CCT5 PE=1 SV=1                  | 0.13  | 0.73  | 0.20  | 0.35 | 0.69 |   |
| P17655 | Calpain-2 catalytic subunit OS=Homo sapiens GN=CAPN2 PE=1 SV=6                         | -0.16 | 0.27  | 0.88  | 0.33 | 0.41 |   |
| Q96P70 | Importin-9 OS=Homo sapiens GN=IPO9 PE=1 SV=3                                           | 0.01  | 0.30  | 0.57  | 0.29 | 0.67 |   |
| P14625 | Endoplasmic reticulum protein OS=Homo sapiens GN=HSP90B1 PE=1 SV=1                     | 0.41  | -0.02 | 0.49  | 0.29 | 0.69 |   |
| Q07065 | Cytoskeleton-associated protein 4 OS=Homo sapiens GN=CKAP4 PE=1 SV=2                   | 0.39  | -0.01 | 0.49  | 0.29 | 0.71 |   |
| Q99832 | T-complex protein 1 subunit eta OS=Homo sapiens GN=CCT7 PE=1 SV=2                      | 0.53  | 0.33  | -0.04 | 0.27 | 0.61 |   |
| P52701 | DNA mismatch repair protein Msh6 OS=Homo sapiens GN=MSH6 PE=1 SV=2                     | 0.45  | 0.15  | 0.15  | 0.25 | 0.88 |   |
| P11142 | Heat shock cognate 71 kDa protein OS=Homo sapiens GN=HSPA8 PE=1 SV=1                   | 0.06  | 0.30  | 0.29  | 0.22 | 0.97 |   |
| Q16576 | Histone-binding protein RBBP7 OS=Homo sapiens GN=RBBP7 PE=1 SV=1                       | 0.22  | -0.07 | 0.45  | 0.20 | 0.50 |   |
| P62937 | Peptidyl-prolyl cis-trans isomerase A OS=Homo sapiens GN=PPIA PE=1 SV=2                | 0.13  | 0.29  | 0.05  | 0.15 | 0.79 |   |
| P50991 | T-complex protein 1 subunit delta OS=Homo sapiens GN=CCT4 PE=1 SV=4                    | -0.16 | 0.67  | -0.08 | 0.14 | 0.19 |   |
| Q9Y6G9 | Cytoplasmic dynein 1 light intermediate chain 1 OS=Homo sapiens GN=DYNC1LI1 PE=1 SV=3  | -0.05 | 0.13  | 0.26  | 0.11 | 0.47 |   |
| O43175 | D-3-phosphoglycerate dehydrogenase OS=Homo sapiens GN=PHGDH PE=1 SV=4                  | 0.26  | 0.23  | -0.25 | 0.08 | 0.18 |   |
| P50416 | Carnitine O-palmitoyltransferase 1, liver isoform OS=Homo sapiens GN=CPT1A PE=1 SV=2   | -0.30 | 0.24  | 0.28  | 0.08 | 0.14 |   |
| Q9Y678 | Coatamer subunit gamma-1 OS=Homo sapiens GN=COPG1 PE=1 SV=1                            | 0.14  | 0.42  | -0.35 | 0.07 | 0.11 |   |
| Q5VYK3 | Proteasome-associated protein ECM29 homolog OS=Homo sapiens GN=ECM29 PE=1 SV=2         | 0.27  | 0.01  | -0.08 | 0.07 | 0.23 |   |
| P06576 | ATP synthase subunit beta, mitochondrial OS=Homo sapiens GN=ATP5B PE=1 SV=3            | 0.23  | 0.13  | -0.17 | 0.06 | 0.19 |   |
| P26639 | Threonine--tRNA ligase, cytoplasmic OS=Homo sapiens GN=TARS PE=1 SV=3                  | -0.35 | 0.74  | -0.24 | 0.05 | 0.04 |   |

|        |                                                                                                              |       |       |       |       |      |   |
|--------|--------------------------------------------------------------------------------------------------------------|-------|-------|-------|-------|------|---|
| P17858 | ATP-dependent 6-phosphofructokinase, liver type OS=Homo sapiens GN=PFKL PE=1 SV=6                            | 0.05  | -0.25 | 0.33  | 0.04  | 0.09 |   |
| P08237 | ATP-dependent 6-phosphofructokinase, muscle type OS=Homo sapiens GN=PFKM PE=1 SV=2                           | 0.21  | 0.10  | -0.22 | 0.03  | 0.08 |   |
| P50990 | T-complex protein 1 subunit theta OS=Homo sapiens GN=CCT8 PE=1 SV=4                                          | 0.29  | -0.02 | -0.18 | 0.03  | 0.07 |   |
| Q00610 | Clathrin heavy chain 1 OS=Homo sapiens GN=CLTC PE=1 SV=5                                                     | -0.11 | 0.00  | 0.19  | 0.03  | 0.11 |   |
| Q92538 | Golgi-specific brefeldin A-resistance guanine nucleotide exchange factor 1 OS=Homo sapiens GN=GBF1 PE=1 SV=2 | -0.03 | 0.19  | -0.12 | 0.01  | 0.05 |   |
| Q9BUF5 | Tubulin beta-6 chain OS=Homo sapiens GN=TUBB6 PE=1 SV=1                                                      | -0.32 | -0.18 | 0.52  | 0.01  | 0.01 |   |
| P07900 | Heat shock protein HSP 90-alpha OS=Homo sapiens GN=HSP90AA1 PE=1 SV=5                                        | 0.21  | -0.24 | 0.05  | 0.01  | 0.02 |   |
| P36578 | 60S ribosomal protein L4 OS=Homo sapiens GN=RPL4 PE=1 SV=5                                                   | -0.19 | 0.08  | 0.10  | 0.00  | 0.01 |   |
| Q8TEX9 | Importin-4 OS=Homo sapiens GN=IPO4 PE=1 SV=2                                                                 | 0.08  | 0.06  | -0.22 | -0.02 | 0.08 |   |
| P07737 | Profilin-1 OS=Homo sapiens GN=PFN1 PE=1 SV=2                                                                 | 0.14  | 0.34  | -0.56 | -0.03 | 0.03 |   |
| P08758 | Annexin A5 OS=Homo sapiens GN=ANXA5 PE=1 SV=2                                                                | -0.43 | -0.08 | 0.42  | -0.03 | 0.04 |   |
| P04792 | Heat shock protein beta-1 OS=Homo sapiens GN=HSPB1 PE=1 SV=2                                                 | 0.17  | -0.35 | 0.06  | -0.04 | 0.09 |   |
| P0CW18 | Serine protease 56 OS=Homo sapiens GN=PRSS56 PE=1 SV=1                                                       | -0.23 | 0.29  | -0.21 | -0.05 | 0.10 |   |
| P18124 | 60S ribosomal protein L7 OS=Homo sapiens GN=RPL7 PE=1 SV=1                                                   | -0.13 | 0.28  | -0.38 | -0.07 | 0.14 |   |
| P62826 | GTP-binding nuclear protein Ran OS=Homo sapiens GN=RAN PE=1 SV=3                                             | 0.15  | -0.31 | -0.10 | -0.09 | 0.24 |   |
| Q9UBB4 | Ataxin-10 OS=Homo sapiens GN=ATXN10 PE=1 SV=1                                                                | -0.01 | -0.37 | 0.08  | -0.10 | 0.26 |   |
| P56192 | Methionine--tRNA ligase, cytoplasmic OS=Homo sapiens GN=MARS PE=1 SV=2                                       | 0.20  | -0.23 | -0.29 | -0.11 | 0.25 |   |
| P39023 | 60S ribosomal protein L3 OS=Homo sapiens GN=RPL3 PE=1 SV=2                                                   | -0.01 | -0.18 | -0.15 | -0.11 | 0.78 |   |
| P62753 | 40S ribosomal protein S6 OS=Homo sapiens GN=RPS6 PE=1 SV=1                                                   | -0.24 | -0.26 | 0.10  | -0.13 | 0.42 |   |
| P38606 | V-type proton ATPase catalytic subunit A OS=Homo sapiens GN=ATP6V1A PE=1 SV=2                                | -0.56 | 0.10  | 0.02  | -0.15 | 0.26 |   |
| P40429 | 60S ribosomal protein L13a OS=Homo sapiens GN=RPL13A PE=1 SV=2                                               | -0.52 | 0.05  | 0.00  | -0.16 | 0.32 |   |
| P49368 | T-complex protein 1 subunit gamma OS=Homo sapiens GN=CCT3 PE=1 SV=4                                          | -0.29 | -0.19 | -0.01 | -0.16 | 0.74 |   |
| P46940 | Ras GTPase-activating-like protein IQGAP1 OS=Homo sapiens GN=IQGAP1 PE=1 SV=1                                | -0.18 | -0.07 | -0.30 | -0.19 | 0.97 |   |
| O60610 | Protein diaphanous homolog 1 OS=Homo sapiens GN=DIAPH1 PE=1 SV=2                                             | -0.23 | -0.21 | -0.13 | -0.19 | 1.65 | + |
| Q02543 | 60S ribosomal protein L18a OS=Homo sapiens GN=RPL18A PE=1 SV=2                                               | -0.30 | -0.36 | 0.06  | -0.20 | 0.58 |   |
| P26641 | Elongation factor 1-gamma OS=Homo sapiens GN=EEF1G PE=1 SV=3                                                 | -0.40 | -0.23 | 0.00  | -0.21 | 0.68 |   |
| P38646 | Stress-70 protein, mitochondrial OS=Homo sapiens GN=HSPA9 PE=1 SV=2                                          | -0.15 | -0.22 | -0.29 | -0.22 | 1.47 | + |

|        |                                                                                                                           |       |       |       |       |      |   |
|--------|---------------------------------------------------------------------------------------------------------------------------|-------|-------|-------|-------|------|---|
| P49411 | Elongation factor Tu, mitochondrial OS=Homo sapiens GN=TUFM PE=1 SV=2                                                     | -0.80 | -0.46 | 0.54  | -0.24 | 0.22 |   |
| O43592 | Exportin-T OS=Homo sapiens GN=XPOT PE=1 SV=2                                                                              | -0.36 | -0.37 | -0.13 | -0.29 | 1.17 |   |
| P46779 | 60S ribosomal protein L28 OS=Homo sapiens GN=RPL28 PE=1 SV=3                                                              | -0.12 | -0.30 | -0.45 | -0.29 | 1.03 |   |
| P62917 | 60S ribosomal protein L8 OS=Homo sapiens GN=RPL8 PE=1 SV=2                                                                | -0.22 | -0.39 | -0.28 | -0.29 | 1.58 | + |
| P49327 | Fatty acid synthase OS=Homo sapiens GN=FASN PE=1 SV=3                                                                     | -0.55 | -0.03 | -0.31 | -0.30 | 0.73 |   |
| Q9UHG3 | Prenylcysteine oxidase 1 OS=Homo sapiens GN=PCYOX1 PE=1 SV=3                                                              | 0.81  | -0.76 | -0.97 | -0.31 | 0.19 |   |
| P63244 | Receptor of activated protein C kinase 1 OS=Homo sapiens GN=RACK1 PE=1 SV=3                                               | -0.34 | -0.28 | -0.38 | -0.33 | 2.15 | + |
| Q16637 | Survival motor neuron protein OS=Homo sapiens GN=SMN1 PE=1 SV=1                                                           | -0.36 | -0.37 | -0.27 | -0.33 | 2.08 | + |
| O00159 | Unconventional myosin-Ic OS=Homo sapiens GN=MYO1C PE=1 SV=4                                                               | -0.26 | -0.22 | -0.53 | -0.34 | 1.12 |   |
| P08621 | U1 small nuclear ribonucleoprotein 70 kDa OS=Homo sapiens GN=SNRNP70 PE=1 SV=2                                            | -0.32 | -0.31 | -0.43 | -0.35 | 1.95 | + |
| P19338 | Nucleolin OS=Homo sapiens GN=NCL PE=1 SV=3                                                                                | -0.44 | -0.35 | -0.30 | -0.36 | 1.89 | + |
| P30153 | Serine/threonine-protein phosphatase 2A 65 kDa regulatory subunit A alpha isoform OS=Homo sapiens<br>GN=PPP2R1A PE=1 SV=4 | -0.71 | 0.00  | -0.39 | -0.36 | 0.66 |   |
| P46781 | 40S ribosomal protein S9 OS=Homo sapiens GN=RPS9 PE=1 SV=3                                                                | -0.40 | -0.45 | -0.25 | -0.37 | 1.59 | + |
| P40227 | T-complex protein 1 subunit zeta OS=Homo sapiens GN=CCT6A PE=1 SV=3                                                       | -0.58 | -0.21 | -0.34 | -0.38 | 1.13 |   |
| P02786 | Transferrin receptor protein 1 OS=Homo sapiens GN=TFRC PE=1 SV=2                                                          | 0.70  | -0.74 | -1.15 | -0.40 | 0.26 |   |
| P15924 | Desmoplakin OS=Homo sapiens GN=DSP PE=1 SV=3                                                                              | -0.43 | -0.51 | -0.28 | -0.41 | 1.57 | + |
| P31327 | Carbamoyl-phosphate synthase [ammonia], mitochondrial OS=Homo sapiens GN=CPS1 PE=1 SV=2                                   | -0.92 | -0.24 | -0.13 | -0.43 | 0.65 |   |
| P29401 | Transketolase OS=Homo sapiens GN=TKT PE=1 SV=3                                                                            | -0.69 | -0.44 | -0.26 | -0.46 | 1.18 |   |
| P43246 | DNA mismatch repair protein Msh2 OS=Homo sapiens GN=MSH2 PE=1 SV=1                                                        | -0.64 | -0.55 | -0.22 | -0.47 | 1.18 |   |
| Q63HN8 | E3 ubiquitin-protein ligase RNF213 OS=Homo sapiens GN=RNF213 PE=1 SV=3                                                    | -0.66 | -0.30 | -0.46 | -0.47 | 1.34 | + |
| P34932 | Heat shock 70 kDa protein 4 OS=Homo sapiens GN=HSPA4 PE=1 SV=4                                                            | -0.59 | -0.49 | -0.35 | -0.48 | 1.69 | + |
| P27708 | CAD protein OS=Homo sapiens GN=CAD PE=1 SV=3                                                                              | -0.74 | -0.37 | -0.44 | -0.52 | 1.36 | + |
| P0DMV9 | Heat shock 70 kDa protein 1B OS=Homo sapiens GN=HSPA1B PE=1 SV=1                                                          | -0.95 | -0.13 | -0.47 | -0.52 | 0.79 |   |
| Q12931 | Heat shock protein 75 kDa, mitochondrial OS=Homo sapiens GN=TRAP1 PE=1 SV=3                                               | -0.40 | -0.25 | -0.91 | -0.52 | 0.92 |   |
| Q15021 | Condensin complex subunit 1 OS=Homo sapiens GN=NCAPD2 PE=1 SV=3                                                           | -0.81 | -0.09 | -0.74 | -0.55 | 0.85 |   |
| P60174 | Triosephosphate isomerase OS=Homo sapiens GN=TPI1 PE=1 SV=3                                                               | 0.33  | -1.25 | -0.77 | -0.56 | 0.45 |   |
| P14618 | Pyruvate kinase PKM OS=Homo sapiens GN=PKM PE=1 SV=4                                                                      | -0.65 | -0.20 | -0.90 | -0.58 | 0.98 |   |

|        |                                                                                                 |       |       |       |       |      |   |
|--------|-------------------------------------------------------------------------------------------------|-------|-------|-------|-------|------|---|
| Q96RQ3 | Methylcrotonoyl-CoA carboxylase subunit alpha, mitochondrial OS=Homo sapiens GN=MCCC1 PE=1 SV=3 | -0.48 | -0.72 | -0.55 | -0.58 | 1.82 | + |
| P62263 | 40S ribosomal protein S14 OS=Homo sapiens GN=RPS14 PE=1 SV=3                                    | -0.52 | -0.79 | -0.50 | -0.60 | 1.63 | + |
| P55786 | Puromycin-sensitive aminopeptidase OS=Homo sapiens GN=NPEPPS PE=1 SV=2                          | -0.28 | -0.59 | -0.93 | -0.60 | 1.07 |   |
| O95347 | Structural maintenance of chromosomes protein 2 OS=Homo sapiens GN=SMC2 PE=1 SV=2               | -0.58 | -0.48 | -0.75 | -0.60 | 1.78 | + |
| Q9P2J5 | Leucine--tRNA ligase, cytoplasmic OS=Homo sapiens GN=LARS PE=1 SV=2                             | -1.28 | -0.73 | 0.12  | -0.63 | 0.58 |   |
| P55072 | Transitional endoplasmic reticulum ATPase OS=Homo sapiens GN=VCP PE=1 SV=4                      | -0.40 | -1.04 | -0.48 | -0.64 | 1.07 |   |
| P07195 | L-lactate dehydrogenase B chain OS=Homo sapiens GN=LDHB PE=1 SV=2                               | -0.42 | -1.79 | 0.21  | -0.67 | 0.42 |   |
| P53396 | ATP-citrate synthase OS=Homo sapiens GN=ACLY PE=1 SV=3                                          | -1.05 | -0.55 | -0.54 | -0.71 | 1.28 |   |
| P22314 | Ubiquitin-like modifier-activating enzyme 1 OS=Homo sapiens GN=UBA1 PE=1 SV=3                   | -0.33 | -0.87 | -0.95 | -0.71 | 1.18 |   |
| Q9NTJ3 | Structural maintenance of chromosomes protein 4 OS=Homo sapiens GN=SMC4 PE=1 SV=2               | -1.22 | 0.03  | -1.00 | -0.73 | 0.70 |   |
| P06733 | Alpha-enolase OS=Homo sapiens GN=ENO1 PE=1 SV=2                                                 | -0.47 | -0.83 | -0.94 | -0.75 | 1.46 | + |
| P55209 | Nucleosome assembly protein 1-like 1 OS=Homo sapiens GN=NAP1L1 PE=1 SV=1                        | -1.20 | -0.33 | -0.76 | -0.76 | 1.03 |   |
| P21333 | Filamin-A OS=Homo sapiens GN=FLNA PE=1 SV=4                                                     | -0.92 | -0.71 | -0.77 | -0.80 | 2.20 | + |
| P15880 | 40S ribosomal protein S2 OS=Homo sapiens GN=RPS2 PE=1 SV=2                                      | -0.95 | -0.93 | -0.61 | -0.83 | 1.76 | + |
| P11021 | 78 kDa glucose-regulated protein OS=Homo sapiens GN=HSPA5 PE=1 SV=2                             | -0.74 | -1.15 | -0.66 | -0.85 | 1.51 | + |
| P35579 | Myosin-9 OS=Homo sapiens GN=MYH9 PE=1 SV=4                                                      | -1.19 | -0.81 | -0.71 | -0.90 | 1.62 | + |
| Q15365 | Poly(rC)-binding protein 1 OS=Homo sapiens GN=PCBP1 PE=1 SV=2                                   | -0.85 | -1.05 | -0.83 | -0.91 | 2.24 | + |
| P61313 | 60S ribosomal protein L15 OS=Homo sapiens GN=RPL15 PE=1 SV=2                                    | -0.82 | -0.96 | -1.15 | -0.98 | 2.03 | + |
| P62899 | 60S ribosomal protein L31 OS=Homo sapiens GN=RPL31 PE=1 SV=1                                    | -0.61 | -1.11 | -1.35 | -1.02 | 1.37 | + |
| Q8WUM4 | Programmed cell death 6-interacting protein OS=Homo sapiens GN=PDCD6IP PE=1 SV=1                | -0.94 | -1.23 | -0.97 | -1.05 | 2.11 | + |
| P22102 | Trifunctional purine biosynthetic protein adenosine-3 OS=Homo sapiens GN=GART PE=1 SV=1         | -1.31 | -0.98 | -0.97 | -1.09 | 1.98 | + |
| P07355 | Annexin A2 OS=Homo sapiens GN=ANXA2 PE=1 SV=2                                                   | -1.16 | -1.16 | -0.95 | -1.09 | 2.39 | + |
| P62241 | 40S ribosomal protein S8 OS=Homo sapiens GN=RPS8 PE=1 SV=2                                      | -1.82 | -0.72 | -0.92 | -1.15 | 1.12 |   |
| P05165 | Propionyl-CoA carboxylase alpha chain, mitochondrial OS=Homo sapiens GN=PCCA PE=1 SV=4          | -0.97 | -1.10 | -1.40 | -1.15 | 1.92 | + |
| P63104 | 14-3-3 protein zeta/delta OS=Homo sapiens GN=YWHAZ PE=1 SV=1                                    | -0.71 | -1.31 | -1.55 | -1.19 | 1.39 | + |
| Q07020 | 60S ribosomal protein L18 OS=Homo sapiens GN=RPL18 PE=1 SV=2                                    | -1.40 | -1.10 | -1.18 | -1.23 | 2.28 | + |
| Q9Y490 | Talin-1 OS=Homo sapiens GN=TLN1 PE=1 SV=3                                                       | -1.43 | -1.04 | -1.43 | -1.30 | 2.00 | + |
| P26373 | 60S ribosomal protein L13 OS=Homo sapiens GN=RPL13 PE=1 SV=4                                    | -1.23 | -1.48 | -1.28 | -1.33 | 2.51 | + |

|        |                                                                                                            |       |       |       |       |      |   |
|--------|------------------------------------------------------------------------------------------------------------|-------|-------|-------|-------|------|---|
| Q02878 | 60S ribosomal protein L6 OS=Homo sapiens GN=RPL6 PE=1 SV=3                                                 | -1.61 | -1.35 | -1.32 | -1.43 | 2.38 | + |
| P49207 | 60S ribosomal protein L34 OS=Homo sapiens GN=RPL34 PE=1 SV=3                                               | -1.70 | -1.31 | -1.45 | -1.49 | 2.24 | + |
| P11498 | Pyruvate carboxylase, mitochondrial OS=Homo sapiens GN=PC PE=1 SV=2                                        | -1.73 | -1.49 | -1.56 | -1.60 | 2.69 | + |
| Q9UQ35 | Serine/arginine repetitive matrix protein 2 OS=Homo sapiens GN=SRRM2 PE=1 SV=2                             | -1.75 | -1.54 | -1.67 | -1.65 | 2.86 | + |
| P78371 | T-complex protein 1 subunit beta OS=Homo sapiens GN=CCT2 PE=1 SV=4                                         | -2.04 | -2.03 | -1.23 | -1.77 | 1.66 | + |
| P04843 | Dolichyl-diphosphooligosaccharide--protein glycosyltransferase subunit 1 OS=Homo sapiens GN=RPN1 PE=1 SV=1 | -0.31 | -1.94 | -3.09 | -1.78 | 0.80 |   |
| Q13085 | Acetyl-CoA carboxylase 1 OS=Homo sapiens GN=ACACA PE=1 SV=2                                                | -1.94 | -1.67 | -1.80 | -1.81 | 2.73 | + |
| Q9H4B7 | Tubulin beta-1 chain OS=Homo sapiens GN=TUBB1 PE=1 SV=1                                                    | -2.14 | -1.52 | -2.15 | -1.94 | 1.95 | + |
| Q13011 | Delta(3,5)-Delta(2,4)-dienoyl-CoA isomerase, mitochondrial OS=Homo sapiens GN=ECH1 PE=1 SV=2               | -4.38 | -3.81 | -4.06 | -4.08 | 2.78 | + |

**Table S4** Global proteomic profiling of PAB-treated HeLa cells.

*(Please see accompanying EXCEL file)*

## 4. References

- [1] Z. Li, P. Hao, L. Li, C. Y. J. Tan, X. Cheng, G. Y. J. Chen, S. K. Sze, H.-M. Shen, S. Q. Yao, *Angew. Chem. Int. Edit.* **2013**, 52, 8551–8556.
- [2] A) X. Yu, T. Hu, J. Du, J. Ding, X. Yang, J. Zhang, B. Yang, X. Shen, Z. Zhang, W. D. Zhong, N. Wen, H. Jiang, P. Zhu, Z. Chen, *J. Biol. Chem.* **2008**, 283, 18056–18065; B) <http://www.ebi.ac.uk/pdbe/entry/pdb/3i85>
- [3] J. R. Wisniewski, A. Zougman, N. Nagaraj, M. Mann, *Nat. Methods* **2009**, 6, 359–362.
