# Supplementary material for: Chemical proteomics reveal CD147 as a functional target of pseudolaric acid B in human cancer cells
Source: Royal Society of Chemistry journal article supplement (doi:10.1039/c7cc04345g), 2017-01-01
Supplement: c7cc04345g2.xlsx [file c7cc04345g2.xlsx]

## Sheet: Processed Data
Table S4 Global proteomic profiling of PAB-treated HeLa cells.
Accession	Description	Replicate 1			Replicate 2			Log2-(PAB/DMSO)	-Log T-test p-value	T-test Significant
		Ratio	Log2-Ratio	Normalized	Ratio	Log2-Ratio	Normalized
O00622	Protein CYR61 OS=Homo sapiens GN=CYR61 PE=1 SV=1	3.036	1.60217	11	3.689	1.88323	12.7296	11.8648	1.33423	+
P05121	Plasminogen activator inhibitor 1 OS=Homo sapiens GN=SERPINE1 PE=1 SV=1	1.83	0.871844	6.03523	1.878	0.909197	6.19597	6.1156	2.07749	+
Q99650	Oncostatin-M-specific receptor subunit beta OS=Homo sapiens GN=OSMR PE=1 SV=1	1.847	0.885184	6.12592	1.861	0.896078	6.10797	6.11694	3.02969	+
P31431	Syndecan-4 OS=Homo sapiens GN=SDC4 PE=1 SV=2	1.661	0.732052	5.08494	1.609	0.686164	4.69991	4.89242	1.60141	+
Q9BZH6	WD repeat-containing protein 11 OS=Homo sapiens GN=WDR11 PE=1 SV=1	1.445	0.531069	3.71866	1.519	0.603122	4.14288	3.93077	1.46446	+
Q9Y696	Chloride intracellular channel protein 4 OS=Homo sapiens GN=CLIC4 PE=1 SV=4	1.449	0.535058	3.74578	1.463	0.54893	3.77937	3.76257	2.54636	+
P04179	Superoxide dismutase [Mn], mitochondrial OS=Homo sapiens GN=SOD2 PE=1 SV=2	1.495	0.580145	4.05228	1.439	0.525067	3.6193	3.83579	1.445	+
P53814	Smoothelin OS=Homo sapiens GN=SMTN PE=1 SV=7	1.392	0.477159	3.35218	1.367	0.451013	3.12257	3.23738	1.64652	+
P09884	DNA polymerase alpha catalytic subunit OS=Homo sapiens GN=POLA1 PE=1 SV=2	1.307	0.386259	2.73425	1.349	0.43189	2.99429	2.86427	1.53942	+
Q9BY77	Polymerase delta-interacting protein 3 OS=Homo sapiens GN=POLDIP3 PE=1 SV=2	1.299	0.377401	2.67404	1.343	0.425459	2.95116	2.8126	1.50394	+
Q13637	Ras-related protein Rab-32 OS=Homo sapiens GN=RAB32 PE=1 SV=3	1.29	0.367371	2.60585	1.319	0.399445	2.77665	2.69125	1.69475	+
Q9HC52	Chromobox protein homolog 8 OS=Homo sapiens GN=CBX8 PE=1 SV=3	1.297	0.375178	2.65893	1.318	0.39835	2.76931	2.71412	1.88791	+
P21291	Cysteine and glycine-rich protein 1 OS=Homo sapiens GN=CSRP1 PE=1 SV=3	1.335	0.41684	2.94214	1.294	0.371838	2.59147	2.7668	1.39482	+
P50402	Emerin OS=Homo sapiens GN=EMD PE=1 SV=1	1.322	0.402722	2.84617	1.285	0.361768	2.52393	2.68505	1.41845	+
P10599	Thioredoxin OS=Homo sapiens GN=TXN PE=1 SV=3	1.294	0.371838	2.63621	1.282	0.358396	2.50131	2.56876	1.77695	+
Q9H993	Protein-glutamate O-methyltransferase OS=Homo sapiens GN=ARMT1 PE=1 SV=1	1.263	0.336855	2.3984	1.281	0.35727	2.49376	2.44608	1.90632	+
Q86VU5	Catechol O-methyltransferase domain-containing protein 1 OS=Homo sapiens GN=COMTD1 PE=1 SV=1	1.296	0.374066	2.65136	1.276	0.351628	2.45591	2.55364	1.61349	+
O95263	High affinity cAMP-specific and IBMX-insensitive 3',5'-cyclic phosphodiesterase 8B OS=Homo sapiens GN=PDE8B PE=1 SV=2	1.257	0.329985	2.3517	1.271	0.345964	2.41792	2.38481	2.05365	+
Q15599	Na(+)/H(+) exchange regulatory cofactor NHE-RF2 OS=Homo sapiens GN=SLC9A3R2 PE=1 SV=2	1.219	0.285698	2.05064	1.267	0.341417	2.38741	2.21903	1.31681	+
Q8TAA5	GrpE protein homolog 2, mitochondrial OS=Homo sapiens GN=GRPEL2 PE=1 SV=1	1.269	0.343692	2.44488	1.266	0.340277	2.37977	2.41233	2.06597	+
Q07021	Complement component 1 Q subcomponent-binding protein, mitochondrial OS=Homo sapiens GN=C1QBP PE=1 SV=1	1.251	0.323082	2.30477	1.26	0.333424	2.3338	2.31929	2.39974	+
P0DMV9	Heat shock 70 kDa protein 1B OS=Homo sapiens GN=HSPA1B PE=1 SV=1	1.239	0.309176	2.21024	1.256	0.328836	2.30303	2.25664	1.88319	+
P36897	TGF-beta receptor type-1 OS=Homo sapiens GN=TGFBR1 PE=1 SV=1	1.271	0.345964	2.46033	1.254	0.326537	2.28761	2.37397	1.63547	+
P49454	Centromere protein F OS=Homo sapiens GN=CENPF PE=1 SV=2	1.278	0.353888	2.51419	1.249	0.320773	2.24894	2.38157	1.45081	+
Q99747	Gamma-soluble NSF attachment protein OS=Homo sapiens GN=NAPG PE=1 SV=1	1.253	0.325386	2.32044	1.245	0.316146	2.2179	2.26917	1.8422	+
Q9Y248	DNA replication complex GINS protein PSF2 OS=Homo sapiens GN=GINS2 PE=1 SV=1	1.205	0.269033	1.93735	1.242	0.312665	2.19456	2.06595	1.40256	+
Q32P44	Echinoderm microtubule-associated protein-like 3 OS=Homo sapiens GN=EML3 PE=1 SV=1	1.204	0.267835	1.92921	1.241	0.311503	2.18676	2.05799	1.4003	+
P19784	Casein kinase II subunit alpha' OS=Homo sapiens GN=CSNK2A2 PE=1 SV=1	1.204	0.267835	1.92921	1.237	0.306846	2.15552	2.04236	1.45303	+
O00458	Interferon-related developmental regulator 1 OS=Homo sapiens GN=IFRD1 PE=1 SV=4	1.202	0.265437	1.91291	1.237	0.306846	2.15552	2.03421	1.42115	+
Q9BYX2	TBC1 domain family member 2A OS=Homo sapiens GN=TBC1D2 PE=1 SV=3	1.264	0.337996	2.40616	1.236	0.305679	2.14769	2.27693	1.44255	+
O14908	PDZ domain-containing protein GIPC1 OS=Homo sapiens GN=GIPC1 PE=1 SV=2	1.212	0.27739	1.99416	1.236	0.305679	2.14769	2.07093	1.62732	+
P05362	Intercellular adhesion molecule 1 OS=Homo sapiens GN=ICAM1 PE=1 SV=2	1.237	0.306846	2.1944	1.232	0.301002	2.11632	2.15536	1.93819	+
Q86TM6	E3 ubiquitin-protein ligase synoviolin OS=Homo sapiens GN=SYVN1 PE=1 SV=2	1.24	0.31034	2.21816	1.229	0.297485	2.09273	2.15544	1.73241	+
Q14192	Four and a half LIM domains protein 2 OS=Homo sapiens GN=FHL2 PE=1 SV=3	1.246	0.317304	2.2655	1.228	0.296311	2.08485	2.17517	1.57807	+
Q99715	Collagen alpha-1(XII) chain OS=Homo sapiens GN=COL12A1 PE=1 SV=2	1.219	0.285698	2.05064	1.228	0.296311	2.08485	2.06775	2.2785	+
Q96G74	OTU domain-containing protein 5 OS=Homo sapiens GN=OTUD5 PE=1 SV=1	1.21	0.275007	1.97796	1.228	0.296311	2.08485	2.03141	1.77612	+
P13640	Metallothionein-1G OS=Homo sapiens GN=MT1G PE=1 SV=2	1.242	0.312665	2.23396	1.223	0.290424	2.04537	2.13967	1.55225	+
P35579	Myosin-9 OS=Homo sapiens GN=MYH9 PE=1 SV=4	1.226	0.293959	2.1068	1.219	0.285698	2.01367	2.06023	1.84204	+
Q6UVK1	Chondroitin sulfate proteoglycan 4 OS=Homo sapiens GN=CSPG4 PE=1 SV=2	1.242	0.312665	2.23396	1.216	0.282143	1.98982	2.11189	1.43466	+
Q96T88	E3 ubiquitin-protein ligase UHRF1 OS=Homo sapiens GN=UHRF1 PE=1 SV=1	1.208	0.27262	1.96174	1.211	0.276199	1.94995	1.95584	2.71686	+
O14950	Myosin regulatory light chain 12B OS=Homo sapiens GN=MYL12B PE=1 SV=2	1.213	0.27858	2.00225	1.2	0.263034	1.86164	1.93195	1.63533	+
P32119	Peroxiredoxin-2 OS=Homo sapiens GN=PRDX2 PE=1 SV=5	1.18	0.238787	1.73174	1.199	0.261832	1.85357	1.79266	1.66505	+
O60447	Ecotropic viral integration site 5 protein homolog OS=Homo sapiens GN=EVI5 PE=1 SV=3	1.174	0.231432	1.68175	1.198	0.260628	1.8455	1.76362	1.52968	+
O14530	Thioredoxin domain-containing protein 9 OS=Homo sapiens GN=TXNDC9 PE=1 SV=2	1.221	0.288063	2.06672	1.195	0.257011	1.82124	1.94398	1.3964	+
O15439	Multidrug resistance-associated protein 4 OS=Homo sapiens GN=ABCC4 PE=1 SV=3	1.21	0.275007	1.97796	1.194	0.255803	1.81313	1.89555	1.55812	+
Q9NPH3	Interleukin-1 receptor accessory protein OS=Homo sapiens GN=IL1RAP PE=1 SV=2	1.174	0.231432	1.68175	1.192	0.253384	1.79691	1.73933	1.67637	+
P19404	NADH dehydrogenase [ubiquinone] flavoprotein 2, mitochondrial OS=Homo sapiens GN=NDUFV2 PE=1 SV=2	1.194	0.255803	1.84741	1.188	0.248535	1.76438	1.8059	1.83467	+
Q9ULC3	Ras-related protein Rab-23 OS=Homo sapiens GN=RAB23 PE=1 SV=1	1.169	0.225275	1.63989	1.185	0.244887	1.73991	1.6899	1.72503	+
Q9NQW6	Actin-binding protein anillin OS=Homo sapiens GN=ANLN PE=1 SV=2	1.186	0.246104	1.78148	1.182	0.24123	1.71538	1.74843	1.91965	+
O75496	Geminin OS=Homo sapiens GN=GMNN PE=1 SV=1	1.173	0.230203	1.67339	1.18	0.238787	1.69899	1.68619	2.31572	+
P06753	Tropomyosin alpha-3 chain OS=Homo sapiens GN=TPM3 PE=1 SV=2	1.203	0.266637	1.92106	1.179	0.237564	1.69079	1.80593	1.3922	+
Q9NUQ6	SPATS2-like protein OS=Homo sapiens GN=SPATS2L PE=1 SV=2	1.201	0.264236	1.90474	1.177	0.235114	1.67436	1.78955	1.38804	+
Q9HCN8	Stromal cell-derived factor 2-like protein 1 OS=Homo sapiens GN=SDF2L1 PE=1 SV=2	1.145	0.195348	1.43644	1.174	0.231432	1.64966	1.54305	1.35739	+
P10809	60 kDa heat shock protein, mitochondrial OS=Homo sapiens GN=HSPD1 PE=1 SV=2	1.174	0.231432	1.68175	1.172	0.228973	1.63316	1.65745	2.03014	+
Q96JJ7	Protein disulfide-isomerase TMX3 OS=Homo sapiens GN=TMX3 PE=1 SV=2	1.167	0.222805	1.62309	1.17	0.226509	1.61663	1.61986	2.89634	+
Q6UX04	Peptidyl-prolyl cis-trans isomerase CWC27 homolog OS=Homo sapiens GN=CWC27 PE=1 SV=1	1.186	0.246104	1.78148	1.165	0.22033	1.57519	1.67834	1.40809	+
Q8NBQ5	Estradiol 17-beta-dehydrogenase 11 OS=Homo sapiens GN=HSD17B11 PE=1 SV=3	1.181	0.240009	1.74005	1.161	0.215368	1.54191	1.64098	1.4158	+
Q9Y3B8	Oligoribonuclease, mitochondrial OS=Homo sapiens GN=REXO2 PE=1 SV=3	1.134	0.181421	1.34177	1.161	0.215368	1.54191	1.44184	1.35543	+
Q9Y305	Acyl-coenzyme A thioesterase 9, mitochondrial OS=Homo sapiens GN=ACOT9 PE=1 SV=2	1.143	0.192825	1.4193	1.159	0.212881	1.52522	1.47226	1.64033	+
P67936	Tropomyosin alpha-4 chain OS=Homo sapiens GN=TPM4 PE=1 SV=3	1.181	0.240009	1.74005	1.157	0.210389	1.50851	1.62428	1.34391	+
P78330	Phosphoserine phosphatase OS=Homo sapiens GN=PSPH PE=1 SV=2	1.145	0.195348	1.43644	1.152	0.204141	1.46659	1.45152	2.17967	+
Q15293	Reticulocalbin-1 OS=Homo sapiens GN=RCN1 PE=1 SV=1	1.14	0.189034	1.39352	1.146	0.196607	1.41606	1.40479	2.29184	+
Q8TEU7	Rap guanine nucleotide exchange factor 6 OS=Homo sapiens GN=RAPGEF6 PE=1 SV=2	1.122	0.166073	1.23743	1.145	0.195348	1.40761	1.32252	1.38824	+
Q9UKD1	Glucocorticoid modulatory element-binding protein 2 OS=Homo sapiens GN=GMEB2 PE=1 SV=1	1.15	0.201634	1.47918	1.142	0.191563	1.38222	1.4307	1.6663	+
P83916	Chromobox protein homolog 1 OS=Homo sapiens GN=CBX1 PE=1 SV=1	1.157	0.210389	1.53869	1.14	0.189034	1.36526	1.45198	1.4205	+
P00367	Glutamate dehydrogenase 1, mitochondrial OS=Homo sapiens GN=GLUD1 PE=1 SV=2	1.156	0.209141	1.53021	1.139	0.187768	1.35677	1.44349	1.41793	+
Q9Y5K8	V-type proton ATPase subunit D OS=Homo sapiens GN=ATP6V1D PE=1 SV=1	1.144	0.194087	1.42787	1.139	0.187768	1.35677	1.39232	1.78908	+
P11142	Heat shock cognate 71 kDa protein OS=Homo sapiens GN=HSPA8 PE=1 SV=1	1.129	0.175045	1.29843	1.138	0.186501	1.34827	1.32335	1.92131	+
Q9ULR0	Pre-mRNA-splicing factor ISY1 homolog OS=Homo sapiens GN=ISY1 PE=1 SV=3	1.132	0.178874	1.32446	1.136	0.183963	1.33125	1.32785	2.78839	+
O43852	Calumenin OS=Homo sapiens GN=CALU PE=1 SV=2	1.139	0.187768	1.38492	1.135	0.182692	1.32272	1.35382	1.83505	+
Q03001	Dystonin OS=Homo sapiens GN=DST PE=1 SV=4	1.133	0.180148	1.33312	1.135	0.182692	1.32272	1.32792	2.6036	+
P18621	60S ribosomal protein L17 OS=Homo sapiens GN=RPL17 PE=1 SV=3	1.138	0.186501	1.3763	1.133	0.180148	1.30566	1.34098	1.77559	+
O75369	Filamin-B OS=Homo sapiens GN=FLNB PE=1 SV=2	1.137	0.185232	1.36768	1.133	0.180148	1.30566	1.33667	1.8307	+
O15118	Niemann-Pick C1 protein OS=Homo sapiens GN=NPC1 PE=1 SV=2	1.117	0.159629	1.19363	1.131	0.177599	1.28856	1.24109	1.61377	+
Q86V48	Leucine zipper protein 1 OS=Homo sapiens GN=LUZP1 PE=1 SV=2	1.108	0.147958	1.11429	1.131	0.177599	1.28856	1.20142	1.33639	+
Q9UHB6	LIM domain and actin-binding protein 1 OS=Homo sapiens GN=LIMA1 PE=1 SV=1	1.125	0.169925	1.26362	1.129	0.175045	1.27143	1.26753	2.70754	+
Q8IVT2	Mitotic interactor and substrate of PLK1 OS=Homo sapiens GN=MISP PE=1 SV=1	1.115	0.157044	1.17605	1.128	0.173767	1.26285	1.21945	1.64498	+
Q16881	Thioredoxin reductase 1, cytoplasmic OS=Homo sapiens GN=TXNRD1 PE=1 SV=3	1.112	0.153157	1.14963	1.127	0.172488	1.25427	1.20195	1.55761	+
O43426	Synaptojanin-1 OS=Homo sapiens GN=SYNJ1 PE=1 SV=2	1.105	0.144046	1.0877	1.126	0.171207	1.24568	1.16669	1.36616	+
Q16222	UDP-N-acetylhexosamine pyrophosphorylase OS=Homo sapiens GN=UAP1 PE=1 SV=3	1.129	0.175045	1.29843	1.125	0.169925	1.23708	1.26776	1.81248	+
Q9NR31	GTP-binding protein SAR1a OS=Homo sapiens GN=SAR1A PE=1 SV=1	1.116	0.158337	1.18485	1.12	0.163499	1.19398	1.18941	2.61202	+
Q9H8G2	Caspase activity and apoptosis inhibitor 1 OS=Homo sapiens GN=CAAP1 PE=1 SV=2	1.104	0.14274	1.07882	1.12	0.163499	1.19398	1.1364	1.49176	+
O75150	E3 ubiquitin-protein ligase BRE1B OS=Homo sapiens GN=RNF40 PE=1 SV=4	1.114	0.155749	1.16725	1.118	0.16092	1.17668	1.17197	2.59173	+
Q9GZS3	WD repeat-containing protein 61 OS=Homo sapiens GN=WDR61 PE=1 SV=1	1.123	0.167358	1.24617	1.117	0.159629	1.16802	1.2071	1.68611	+
Q9Y6A5	Transforming acidic coiled-coil-containing protein 3 OS=Homo sapiens GN=TACC3 PE=1 SV=1	1.135	0.182692	1.35041	1.116	0.158337	1.15935	1.25488	1.31542	+
P30048	Thioredoxin-dependent peroxide reductase, mitochondrial OS=Homo sapiens GN=PRDX3 PE=1 SV=3	1.114	0.155749	1.16725	1.116	0.158337	1.15935	1.1633	2.66517	+
Q9BR61	Acyl-CoA-binding domain-containing protein 6 OS=Homo sapiens GN=ACBD6 PE=1 SV=1	1.11	0.15056	1.13198	1.115	0.157044	1.15068	1.14133	2.2827	+
P52565	Rho GDP-dissociation inhibitor 1 OS=Homo sapiens GN=ARHGDIA PE=1 SV=3	1.131	0.177599	1.31579	1.114	0.155749	1.14199	1.22889	1.34735	+
P51858	Hepatoma-derived growth factor OS=Homo sapiens GN=HDGF PE=1 SV=1	1.103	0.141433	1.06993	1.112	0.153157	1.1246	1.09727	1.79979	+
P61604	10 kDa heat shock protein, mitochondrial OS=Homo sapiens GN=HSPE1 PE=1 SV=2	1.125	0.169925	1.26362	1.108	0.147958	1.08973	1.17668	1.32832	+
Q9UNK0	Syntaxin-8 OS=Homo sapiens GN=STX8 PE=1 SV=2	1.093	0.128293	0.980612	1.108	0.147958	1.08973	1.03517	1.47466	+
Q92785	Zinc finger protein ubi-d4 OS=Homo sapiens GN=DPF2 PE=1 SV=2	1.118	0.16092	1.20241	1.107	0.146655	1.08099	1.1417	1.47084	+
O95801	Tetratricopeptide repeat protein 4 OS=Homo sapiens GN=TTC4 PE=1 SV=3	1.089	0.123004	0.944654	1.107	0.146655	1.08099	1.01282	1.36871	+
P17844	Probable ATP-dependent RNA helicase DDX5 OS=Homo sapiens GN=DDX5 PE=1 SV=1	1.116	0.158337	1.18485	1.106	0.145351	1.07225	1.12855	1.49849	+
P23458	Tyrosine-protein kinase JAK1 OS=Homo sapiens GN=JAK1 PE=1 SV=2	1.118	0.16092	1.20241	1.105	0.144046	1.06349	1.13295	1.40916	+
P26373	60S ribosomal protein L13 OS=Homo sapiens GN=RPL13 PE=1 SV=4	1.117	0.159629	1.19363	1.105	0.144046	1.06349	1.12856	1.43576	+
Q04917	14-3-3 protein eta OS=Homo sapiens GN=YWHAH PE=1 SV=4	1.099	0.136191	1.0343	1.105	0.144046	1.06349	1.0489	2.05263	+
Q71RC2	La-related protein 4 OS=Homo sapiens GN=LARP4 PE=1 SV=3	1.108	0.147958	1.11429	1.104	0.14274	1.05473	1.08451	1.75755	+
P37802	Transgelin-2 OS=Homo sapiens GN=TAGLN2 PE=1 SV=3	1.1	0.137504	1.04322	1.103	0.141433	1.04596	1.04459	3.07808	+
P21333	Filamin-A OS=Homo sapiens GN=FLNA PE=1 SV=4	1.089	0.123004	0.944654	1.101	0.138814	1.0284	0.986526	1.56856	+
P52292	Importin subunit alpha-1 OS=Homo sapiens GN=KPNA2 PE=1 SV=1	1.096	0.132248	1.00749	1.099	0.136191	1.0108	1.00915	2.98106	+
Q05D32	CTD small phosphatase-like protein 2 OS=Homo sapiens GN=CTDSPL2 PE=1 SV=2	1.085	0.117695	0.908564	1.099	0.136191	1.0108	0.959684	1.47007	+
A3KMH1	von Willebrand factor A domain-containing protein 8 OS=Homo sapiens GN=VWA8 PE=1 SV=2	1.103	0.141433	1.06993	1.095	0.130931	0.975518	1.02273	1.53218	+
P49023	Paxillin OS=Homo sapiens GN=PXN PE=1 SV=3	1.085	0.117695	0.908564	1.094	0.129613	0.966676	0.93762	1.70505	+
P52815	39S ribosomal protein L12, mitochondrial OS=Homo sapiens GN=MRPL12 PE=1 SV=2	1.079	0.109695	0.854179	1.093	0.128293	0.957827	0.906003	1.43919	+
Q15274	Nicotinate-nucleotide pyrophosphorylase [carboxylating] OS=Homo sapiens GN=QPRT PE=1 SV=3	1.077	0.107018	0.835984	1.092	0.126973	0.948969	0.892476	1.39531	+
O00139	Kinesin-like protein KIF2A OS=Homo sapiens GN=KIF2A PE=1 SV=3	1.09	0.124328	0.953656	1.091	0.125651	0.940102	0.946879	2.34139	+
O95239	Chromosome-associated kinesin KIF4A OS=Homo sapiens GN=KIF4A PE=1 SV=3	1.083	0.115033	0.890469	1.09	0.124328	0.931228	0.910849	1.84644	+
P52732	Kinesin-like protein KIF11 OS=Homo sapiens GN=KIF11 PE=1 SV=2	1.092	0.126973	0.971634	1.085	0.117695	0.886735	0.929185	1.53665	+
P12004	Proliferating cell nuclear antigen OS=Homo sapiens GN=PCNA PE=1 SV=1	1.081	0.112367	0.872341	1.083	0.115033	0.868879	0.87061	2.89773	+
Q15084	Protein disulfide-isomerase A6 OS=Homo sapiens GN=PDIA6 PE=1 SV=1	1.094	0.129613	0.98958	1.082	0.1137	0.85994	0.92476	1.35115	+
Q9UPQ0	LIM and calponin homology domains-containing protein 1 OS=Homo sapiens GN=LIMCH1 PE=1 SV=4	1.094	0.129613	0.98958	1.081	0.112367	0.850992	0.920286	1.32017	+
Q5TDH0	Protein DDI1 homolog 2 OS=Homo sapiens GN=DDI2 PE=1 SV=1	1.081	0.112367	0.872341	1.08	0.111031	0.842036	0.857188	1.94876	+
Q01844	RNA-binding protein EWS OS=Homo sapiens GN=EWSR1 PE=1 SV=1	1.069	0.0962619	0.762862	1.08	0.111031	0.842036	0.802449	1.50334	+
Q09666	Neuroblast differentiation-associated protein AHNAK OS=Homo sapiens GN=AHNAK PE=1 SV=2	1.087	0.120352	0.926626	1.077	0.107018	0.815117	0.870871	1.39039	+
P15291	Beta-1,4-galactosyltransferase 1 OS=Homo sapiens GN=B4GALT1 PE=1 SV=5	1.075	0.104337	0.817755	1.077	0.107018	0.815117	0.816436	2.98784	+
P00533	Epidermal growth factor receptor OS=Homo sapiens GN=EGFR PE=1 SV=2	1.085	0.117695	0.908564	1.076	0.105678	0.806127	0.857346	1.42036	+
Q9Y320	Thioredoxin-related transmembrane protein 2 OS=Homo sapiens GN=TMX2 PE=1 SV=1	1.063	0.0881416	0.707661	1.076	0.105678	0.806127	0.756894	1.38351	+
P08195	4F2 cell-surface antigen heavy chain OS=Homo sapiens GN=SLC3A2 PE=1 SV=3	1.083	0.115033	0.890469	1.075	0.104337	0.79713	0.843799	1.45377	+
P35580	Myosin-10 OS=Homo sapiens GN=MYH10 PE=1 SV=3	1.063	0.0881416	0.707661	1.075	0.104337	0.79713	0.752395	1.42243	+
Q13492	Phosphatidylinositol-binding clathrin assembly protein OS=Homo sapiens GN=PICALM PE=1 SV=2	1.083	0.115033	0.890469	1.074	0.102994	0.788123	0.839296	1.41153	+
P51798	H(+)/Cl(-) exchange transporter 7 OS=Homo sapiens GN=CLCN7 PE=1 SV=2	1.078	0.108357	0.845085	1.074	0.102994	0.788123	0.816604	1.65375	+
Q13418	Integrin-linked protein kinase OS=Homo sapiens GN=ILK PE=1 SV=2	1.07	0.0976108	0.772033	1.073	0.10165	0.779108	0.77557	2.53704	+
P48634	Protein PRRC2A OS=Homo sapiens GN=PRRC2A PE=1 SV=3	1.064	0.0894982	0.716883	1.073	0.10165	0.779108	0.747995	1.57733	+
Q9UJU6	Drebrin-like protein OS=Homo sapiens GN=DBNL PE=1 SV=1	1.076	0.105678	0.826873	1.072	0.100305	0.770085	0.798479	1.64534	+
Q9BTU6	Phosphatidylinositol 4-kinase type 2-alpha OS=Homo sapiens GN=PI4K2A PE=1 SV=1	1.069	0.0962619	0.762862	1.072	0.100305	0.770085	0.766474	2.52293	+
Q15637	Splicing factor 1 OS=Homo sapiens GN=SF1 PE=1 SV=4	1.064	0.0894982	0.716883	1.072	0.100305	0.770085	0.743484	1.64268	+
P47756	F-actin-capping protein subunit beta OS=Homo sapiens GN=CAPZB PE=1 SV=4	1.074	0.102994	0.808627	1.071	0.0989585	0.761054	0.78484	1.7147	+
Q13287	N-myc-interactor OS=Homo sapiens GN=NMI PE=1 SV=2	1.065	0.0908534	0.726097	1.071	0.0989585	0.761054	0.743575	1.82502	+
P62244	40S ribosomal protein S15a OS=Homo sapiens GN=RPS15A PE=1 SV=2	1.071	0.0989585	0.781194	1.07	0.0976108	0.752014	0.766604	1.9167	+
Q2M389	WASH complex subunit 7 OS=Homo sapiens GN=KIAA1033 PE=1 SV=2	1.069	0.0962619	0.762862	1.068	0.0949116	0.733908	0.748385	1.90961	+
Q03405	Urokinase plasminogen activator surface receptor OS=Homo sapiens GN=PLAUR PE=1 SV=1	1.068	0.0949116	0.753683	1.067	0.0935602	0.724843	0.739263	1.90601	+
Q16543	Hsp90 co-chaperone Cdc37 OS=Homo sapiens GN=CDC37 PE=1 SV=1	1.07	0.0976108	0.772033	1.066	0.0922074	0.715769	0.743901	1.61864	+
Q9NQE9	Histidine triad nucleotide-binding protein 3 OS=Homo sapiens GN=HINT3 PE=1 SV=1	1.059	0.0827026	0.670687	1.065	0.0908534	0.706687	0.688687	1.77897	+
Q12846	Syntaxin-4 OS=Homo sapiens GN=STX4 PE=1 SV=2	1.056	0.0786098	0.642865	1.064	0.0894982	0.697596	0.67023	1.58538	+
Q3ZCQ8	Mitochondrial import inner membrane translocase subunit TIM50 OS=Homo sapiens GN=TIMM50 PE=1 SV=2	1.053	0.0745054	0.614963	1.064	0.0894982	0.697596	0.656279	1.39766	+
P62241	40S ribosomal protein S8 OS=Homo sapiens GN=RPS8 PE=1 SV=2	1.073	0.10165	0.799491	1.063	0.0881416	0.688496	0.743993	1.32422	+
P32929	Cystathionine gamma-lyase OS=Homo sapiens GN=CTH PE=1 SV=3	1.063	0.0881416	0.707661	1.061	0.0854247	0.670271	0.688966	1.76271	+
Q99598	Translin-associated protein X OS=Homo sapiens GN=TSNAX PE=1 SV=1	1.051	0.0717627	0.596318	1.06	0.0840643	0.661146	0.628732	1.48424	+
Q13309	S-phase kinase-associated protein 2 OS=Homo sapiens GN=SKP2 PE=1 SV=2	1.051	0.0717627	0.596318	1.059	0.0827026	0.652013	0.624165	1.54692	+
P00441	Superoxide dismutase [Cu-Zn] OS=Homo sapiens GN=SOD1 PE=1 SV=2	1.065	0.0908534	0.726097	1.056	0.0786098	0.624559	0.675328	1.32085	+
Q9UQ90	Paraplegin OS=Homo sapiens GN=SPG7 PE=1 SV=2	1.06	0.0840643	0.679943	1.056	0.0786098	0.624559	0.652251	1.56844	+
P18206	Vinculin OS=Homo sapiens GN=VCL PE=1 SV=4	1.053	0.0745054	0.614963	1.055	0.077243	0.61539	0.615176	3.65553	+
Q96GX9	Methylthioribulose-1-phosphate dehydratase OS=Homo sapiens GN=APIP PE=1 SV=1	1.053	0.0745054	0.614963	1.055	0.077243	0.61539	0.615176	3.65553	+
O60566	Mitotic checkpoint serine/threonine-protein kinase BUB1 beta OS=Homo sapiens GN=BUB1B PE=1 SV=3	1.048	0.0676387	0.568283	1.055	0.077243	0.61539	0.591837	1.5965	+
P30154	Serine/threonine-protein phosphatase 2A 65 kDa regulatory subunit A beta isoform OS=Homo sapiens GN=PPP2R1B PE=1 SV=3	1.045	0.0635029	0.540168	1.055	0.077243	0.61539	0.577779	1.38318	+
P0CG08	Golgi pH regulator B OS=Homo sapiens GN=GPR89B PE=1 SV=1	1.062	0.0867838	0.698431	1.054	0.0758749	0.606214	0.652322	1.34752	+
Q8IYI6	Exocyst complex component 8 OS=Homo sapiens GN=EXOC8 PE=1 SV=2	1.055	0.077243	0.633572	1.054	0.0758749	0.606214	0.619893	1.85244	+
P11177	Pyruvate dehydrogenase E1 component subunit beta, mitochondrial OS=Homo sapiens GN=PDHB PE=1 SV=3	1.057	0.0799754	0.652148	1.052	0.0731347	0.587833	0.619991	1.48161	+
P08238	Heat shock protein HSP 90-beta OS=Homo sapiens GN=HSP90AB1 PE=1 SV=4	1.045	0.0635029	0.540168	1.052	0.0731347	0.587833	0.564001	1.57049	+
O43823	A-kinase anchor protein 8 OS=Homo sapiens GN=AKAP8 PE=1 SV=1	1.057	0.0799754	0.652148	1.051	0.0717627	0.57863	0.615389	1.42042	+
O75792	Ribonuclease H2 subunit A OS=Homo sapiens GN=RNASEH2A PE=1 SV=2	1.053	0.0745054	0.614963	1.051	0.0717627	0.57863	0.596796	1.71281	+
P62937	Peptidyl-prolyl cis-trans isomerase A OS=Homo sapiens GN=PPIA PE=1 SV=2	1.052	0.0731347	0.605645	1.051	0.0717627	0.57863	0.592138	1.83803	+
Q5MNZ6	WD repeat domain phosphoinositide-interacting protein 3 OS=Homo sapiens GN=WDR45B PE=2 SV=2	1.042	0.0593553	0.511974	1.051	0.0717627	0.57863	0.545302	1.41049	+
P23246	Splicing factor, proline- and glutamine-rich OS=Homo sapiens GN=SFPQ PE=1 SV=2	1.042	0.0593553	0.511974	1.05	0.0703893	0.569417	0.540695	1.47127	+
O96019	Actin-like protein 6A OS=Homo sapiens GN=ACTL6A PE=1 SV=1	1.057	0.0799754	0.652148	1.049	0.0690147	0.560197	0.606172	1.31702	+
Q8N0W3	L-fucose kinase OS=Homo sapiens GN=FUK PE=2 SV=2	1.055	0.077243	0.633572	1.048	0.0676387	0.550967	0.59227	1.35336	+
Q9Y3D9	28S ribosomal protein S23, mitochondrial OS=Homo sapiens GN=MRPS23 PE=1 SV=2	1.055	0.077243	0.633572	1.047	0.0662614	0.541729	0.587651	1.3041	+
Q9UI26	Importin-11 OS=Homo sapiens GN=IPO11 PE=1 SV=1	1.048	0.0676387	0.568283	1.046	0.0648829	0.532481	0.550382	1.68406	+
P55081	Microfibrillar-associated protein 1 OS=Homo sapiens GN=MFAP1 PE=1 SV=2	1.049	0.0690147	0.577637	1.045	0.0635029	0.523225	0.550431	1.5025	+
Q96P48	Arf-GAP with Rho-GAP domain, ANK repeat and PH domain-containing protein 1 OS=Homo sapiens GN=ARAP1 PE=1 SV=3	1.046	0.0648829	0.549549	1.045	0.0635029	0.523225	0.536387	1.80635	+
Q15404	Ras suppressor protein 1 OS=Homo sapiens GN=RSU1 PE=1 SV=3	1.051	0.0717627	0.596318	1.044	0.0621217	0.51396	0.555139	1.32664	+
P49756	RNA-binding protein 25 OS=Homo sapiens GN=RBM25 PE=1 SV=3	1.047	0.0662614	0.558921	1.044	0.0621217	0.51396	0.536441	1.57409	+
Q9UI08	Ena/VASP-like protein OS=Homo sapiens GN=EVL PE=1 SV=2	1.045	0.0635029	0.540168	1.044	0.0621217	0.51396	0.527064	1.80067	+
Q9H7Z7	Prostaglandin E synthase 2 OS=Homo sapiens GN=PTGES2 PE=1 SV=1	1.036	0.051024	0.455338	1.044	0.0621217	0.51396	0.484649	1.41504	+
P21796	Voltage-dependent anion-selective channel protein 1 OS=Homo sapiens GN=VDAC1 PE=1 SV=2	1.038	0.0538064	0.474252	1.043	0.0607392	0.504686	0.489469	1.70366	+
P08621	U1 small nuclear ribonucleoprotein 70 kDa OS=Homo sapiens GN=SNRNP70 PE=1 SV=2	1.034	0.0482362	0.436386	1.043	0.0607392	0.504686	0.470536	1.33609	+
Q8WUF5	RelA-associated inhibitor OS=Homo sapiens GN=PPP1R13L PE=1 SV=4	1.043	0.0607392	0.52138	1.042	0.0593553	0.495404	0.508392	1.78886	+
Q6ZRP7	Sulfhydryl oxidase 2 OS=Homo sapiens GN=QSOX2 PE=1 SV=3	1.041	0.0579701	0.502557	1.042	0.0593553	0.495404	0.49898	2.34077	+
Q6QNY0	Biogenesis of lysosome-related organelles complex 1 subunit 3 OS=Homo sapiens GN=BLOC1S3 PE=1 SV=1	1.039	0.0551957	0.483696	1.042	0.0593553	0.495404	0.48955	2.11851	+
P17812	CTP synthase 1 OS=Homo sapiens GN=CTPS1 PE=1 SV=2	1.038	0.0538064	0.474252	1.042	0.0593553	0.495404	0.484828	1.85746	+
P50213	Isocitrate dehydrogenase [NAD] subunit alpha, mitochondrial OS=Homo sapiens GN=IDH3A PE=1 SV=1	1.033	0.0468403	0.426896	1.042	0.0593553	0.495404	0.46115	1.32605	+
Q7Z569	BRCA1-associated protein OS=Homo sapiens GN=BRAP PE=1 SV=2	1.046	0.0648829	0.549549	1.041	0.0579701	0.486112	0.517831	1.40953	+
Q07812	Apoptosis regulator BAX OS=Homo sapiens GN=BAX PE=1 SV=1	1.041	0.0579701	0.502557	1.041	0.0579701	0.486112	0.494334	1.97518	+
P52597	Heterogeneous nuclear ribonucleoprotein F OS=Homo sapiens GN=HNRNPF PE=1 SV=3	1.034	0.0482362	0.436386	1.037	0.0524159	0.448855	0.442621	2.0474	+
P28065	Proteasome subunit beta type-9 OS=Homo sapiens GN=PSMB9 PE=1 SV=2	1.034	0.0482362	0.436386	1.036	0.051024	0.439519	0.437953	2.64268	+
P55084	Trifunctional enzyme subunit beta, mitochondrial OS=Homo sapiens GN=HADHB PE=1 SV=3	1.035	0.0496308	0.445866	1.035	0.0496308	0.430173	0.438019	1.94298	+
Q99584	Protein S100-A13 OS=Homo sapiens GN=S100A13 PE=1 SV=1	1.031	0.0440443	0.40789	1.035	0.0496308	0.430173	0.419032	1.77153	+
Q99614	Tetratricopeptide repeat protein 1 OS=Homo sapiens GN=TTC1 PE=1 SV=1	1.037	0.0524159	0.464799	1.034	0.0482362	0.420819	0.442809	1.50047	+
O60671	Cell cycle checkpoint protein RAD1 OS=Homo sapiens GN=RAD1 PE=1 SV=1	1.029	0.041243	0.388847	1.033	0.0468403	0.411455	0.400151	1.74523	+
Q9Y2U8	Inner nuclear membrane protein Man1 OS=Homo sapiens GN=LEMD3 PE=1 SV=2	1.036	0.051024	0.455338	1.032	0.045443	0.402082	0.42871	1.4035	+
O00330	Pyruvate dehydrogenase protein X component, mitochondrial OS=Homo sapiens GN=PDHX PE=1 SV=3	1.033	0.0468403	0.426896	1.03	0.0426443	0.383309	0.405103	1.46578	+
Q9UBB4	Ataxin-10 OS=Homo sapiens GN=ATXN10 PE=1 SV=1	1.027	0.0384362	0.369766	1.03	0.0426443	0.383309	0.376538	1.94126	+
Q86YV9	Hermansky-Pudlak syndrome 6 protein OS=Homo sapiens GN=HPS6 PE=1 SV=1	1.025	0.0356239	0.350648	1.03	0.0426443	0.383309	0.366979	1.54804	+
P98175	RNA-binding protein 10 OS=Homo sapiens GN=RBM10 PE=1 SV=3	1.023	0.0328061	0.331493	1.03	0.0426443	0.383309	0.357401	1.3366	+
Q9NVI7	ATPase family AAA domain-containing protein 3A OS=Homo sapiens GN=ATAD3A PE=1 SV=2	1.028	0.0398403	0.379311	1.029	0.041243	0.37391	0.376611	2.3406	+
O60506	Heterogeneous nuclear ribonucleoprotein Q OS=Homo sapiens GN=SYNCRIP PE=1 SV=2	1.031	0.0440443	0.40789	1.028	0.0398403	0.364501	0.386195	1.44703	+
Q13813	Spectrin alpha chain, non-erythrocytic 1 OS=Homo sapiens GN=SPTAN1 PE=1 SV=3	1.025	0.0356239	0.350648	1.028	0.0398403	0.364501	0.357574	1.90904	+
O15027	Protein transport protein Sec16A OS=Homo sapiens GN=SEC16A PE=1 SV=3	1.024	0.0342157	0.341076	1.028	0.0398403	0.364501	0.352788	1.67515	+
Q96MW1	Coiled-coil domain-containing protein 43 OS=Homo sapiens GN=CCDC43 PE=1 SV=2	1.024	0.0342157	0.341076	1.027	0.0384362	0.355082	0.348079	1.89258	+
Q16537	Serine/threonine-protein phosphatase 2A 56 kDa regulatory subunit epsilon isoform OS=Homo sapiens GN=PPP2R5E PE=1 SV=1	1.022	0.0313952	0.321901	1.026	0.0370307	0.345655	0.333778	1.64506	+
Q9ULV4	Coronin-1C OS=Homo sapiens GN=CORO1C PE=1 SV=1	1.019	0.0271541	0.293071	1.025	0.0356239	0.336218	0.314645	1.3607	+
P84085	ADP-ribosylation factor 5 OS=Homo sapiens GN=ARF5 PE=1 SV=2	1.025	0.0356239	0.350648	1.023	0.0328061	0.317317	0.333983	1.49839	+
P07900	Heat shock protein HSP 90-alpha OS=Homo sapiens GN=HSP90AA1 PE=1 SV=5	1.02	0.0285692	0.30269	1.023	0.0328061	0.317317	0.310004	1.82345	+
P23588	Eukaryotic translation initiation factor 4B OS=Homo sapiens GN=EIF4B PE=1 SV=2	1.023	0.0328061	0.331493	1.022	0.0313952	0.307852	0.319673	1.62839	+
Q7L7X3	Serine/threonine-protein kinase TAO1 OS=Homo sapiens GN=TAOK1 PE=1 SV=1	1.021	0.0299829	0.312301	1.02	0.0285692	0.288896	0.300599	1.60605	+
Q8NBJ4	Golgi membrane protein 1 OS=Homo sapiens GN=GOLM1 PE=1 SV=1	1.02	0.0285692	0.30269	1.02	0.0285692	0.288896	0.295793	1.82852	+
Q9Y6H1	Coiled-coil-helix-coiled-coil-helix domain-containing protein 2 OS=Homo sapiens GN=CHCHD2 PE=1 SV=1	1.02	0.0285692	0.30269	1.019	0.0271541	0.279405	0.291047	1.59426	+
Q14151	Scaffold attachment factor B2 OS=Homo sapiens GN=SAFB2 PE=1 SV=1	1.019	0.0271541	0.293071	1.019	0.0271541	0.279405	0.286238	1.8183	+
P16949	Stathmin OS=Homo sapiens GN=STMN1 PE=1 SV=3	1.018	0.0257376	0.283441	1.019	0.0271541	0.279405	0.281423	2.34047	+
P31327	Carbamoyl-phosphate synthase [ammonia], mitochondrial OS=Homo sapiens GN=CPS1 PE=1 SV=2	1.015	0.0214797	0.254497	1.019	0.0271541	0.279405	0.266951	1.52756	+
P12270	Nucleoprotein TPR OS=Homo sapiens GN=TPR PE=1 SV=3	1.021	0.0299829	0.312301	1.018	0.0257376	0.269903	0.291102	1.33461	+
P43246	DNA mismatch repair protein Msh2 OS=Homo sapiens GN=MSH2 PE=1 SV=1	1.018	0.0257376	0.283441	1.018	0.0257376	0.269903	0.276672	1.80762	+
Q9UBQ7	Glyoxylate reductase/hydroxypyruvate reductase OS=Homo sapiens GN=GRHPR PE=1 SV=1	1.016	0.0229004	0.264155	1.018	0.0257376	0.269903	0.267029	2.16423	+
Q9H2J4	Phosducin-like protein 3 OS=Homo sapiens GN=PDCL3 PE=1 SV=1	1.014	0.0200577	0.24483	1.016	0.0229004	0.250872	0.247851	2.11022	+
O60313	Dynamin-like 120 kDa protein, mitochondrial OS=Homo sapiens GN=OPA1 PE=1 SV=3	1.012	0.0172093	0.225466	1.016	0.0229004	0.250872	0.238169	1.46952	+
O95747	Serine/threonine-protein kinase OSR1 OS=Homo sapiens GN=OXSR1 PE=1 SV=1	1.016	0.0229004	0.264155	1.015	0.0214797	0.241342	0.252748	1.54195	+
Q16576	Histone-binding protein RBBP7 OS=Homo sapiens GN=RBBP7 PE=1 SV=1	1.015	0.0214797	0.254497	1.015	0.0214797	0.241342	0.247919	1.77247	+
P50452	Serpin B8 OS=Homo sapiens GN=SERPINB8 PE=1 SV=2	1.014	0.0200577	0.24483	1.015	0.0214797	0.241342	0.243086	2.34027	+
P61978	Heterogeneous nuclear ribonucleoprotein K OS=Homo sapiens GN=HNRNPK PE=1 SV=1	1.013	0.0186342	0.235153	1.015	0.0214797	0.241342	0.238247	2.08261	+
O60763	General vesicular transport factor p115 OS=Homo sapiens GN=USO1 PE=1 SV=2	1.01	0.0143553	0.206065	1.013	0.0186342	0.222254	0.21416	1.61887	+
Q12913	Receptor-type tyrosine-protein phosphatase eta OS=Homo sapiens GN=PTPRJ PE=1 SV=3	1.009	0.0129262	0.19635	1.013	0.0186342	0.222254	0.209302	1.4051	+
Q13561	Dynactin subunit 2 OS=Homo sapiens GN=DCTN2 PE=1 SV=4	1.009	0.0129262	0.19635	1.013	0.0186342	0.222254	0.209302	1.4051	+
P14618	Pyruvate kinase PKM OS=Homo sapiens GN=PKM PE=1 SV=4	1.011	0.015783	0.215771	1.01	0.0143553	0.193552	0.204662	1.46189	+
O94906	Pre-mRNA-processing factor 6 OS=Homo sapiens GN=PRPF6 PE=1 SV=1	1.004	0.00575927	0.147629	1.007	0.0100637	0.164765	0.156197	1.45736	+
Q9NZ08	Endoplasmic reticulum aminopeptidase 1 OS=Homo sapiens GN=ERAP1 PE=1 SV=3	1.003	0.00432161	0.137857	1.006	0.00863031	0.155151	0.146504	1.42561	+
Q14204	Cytoplasmic dynein 1 heavy chain 1 OS=Homo sapiens GN=DYNC1H1 PE=1 SV=5	1.005	0.0071955	0.157393	1.005	0.0071955	0.145526	0.15146	1.60332	+
P09651	Heterogeneous nuclear ribonucleoprotein A1 OS=Homo sapiens GN=HNRNPA1 PE=1 SV=5	1.004	0.00575927	0.147629	1.004	0.00575927	0.135892	0.14176	1.57937	+
Q92538	Golgi-specific brefeldin A-resistance guanine nucleotide exchange factor 1 OS=Homo sapiens GN=GBF1 PE=1 SV=2	0.998	-0.00288828	0.0888445	1	0	0.0972601	0.0930523	1.54109	+
Q14554	Protein disulfide-isomerase A5 OS=Homo sapiens GN=PDIA5 PE=1 SV=1	0.999	-0.00144342	0.0986665	0.999	-0.00144342	0.0875781	0.0931223	1.42185	+
Q68CQ4	Digestive organ expansion factor homolog OS=Homo sapiens GN=DIEXF PE=1 SV=2	0.997	-0.00433459	0.0790121	0.999	-0.00144342	0.0875781	0.0832951	1.48537	+
Q00610	Clathrin heavy chain 1 OS=Homo sapiens GN=CLTC PE=1 SV=5	0.993	-0.0101344	0.0395853	0.994	-0.00868224	0.0390215	0.0393034	2.34047	+
Q9NXV6	CDKN2A-interacting protein OS=Homo sapiens GN=CDKN2AIP PE=1 SV=3	0.992	-0.011588	0.029704	0.993	-0.0101344	0.0292805	0.0294922	2.34001	+
P08240	Signal recognition particle receptor subunit alpha OS=Homo sapiens GN=SRPRA PE=1 SV=2	0.978	-0.0320936	-0.109693	0.978	-0.0320936	-0.118018	-0.113855	1.63331	+
Q9H6R4	Nucleolar protein 6 OS=Homo sapiens GN=NOL6 PE=1 SV=2	0.976	-0.0350469	-0.129769	0.978	-0.0320936	-0.118018	-0.123893	1.52044	+
P53794	Sodium/myo-inositol cotransporter OS=Homo sapiens GN=SLC5A3 PE=3 SV=2	0.975	-0.0365259	-0.139822	0.976	-0.0350469	-0.137828	-0.138825	2.33975	+
O43719	HIV Tat-specific factor 1 OS=Homo sapiens GN=HTATSF1 PE=1 SV=1	0.976	-0.0350469	-0.129769	0.975	-0.0365259	-0.147748	-0.138758	1.38525	+
P33991	DNA replication licensing factor MCM4 OS=Homo sapiens GN=MCM4 PE=1 SV=5	0.969	-0.0454314	-0.200362	0.972	-0.0409718	-0.17757	-0.188966	1.41628	+
Q8N3U4	Cohesin subunit SA-2 OS=Homo sapiens GN=STAG2 PE=1 SV=3	0.971	-0.0424568	-0.180141	0.971	-0.0424568	-0.187531	-0.183836	1.89295	+
P12081	Histidine--tRNA ligase, cytoplasmic OS=Homo sapiens GN=HARS PE=1 SV=2	0.972	-0.0409718	-0.170046	0.97	-0.0439433	-0.197503	-0.183774	1.32359	+
Q9H900	Protein zwilch homolog OS=Homo sapiens GN=ZWILCH PE=1 SV=2	0.97	-0.0439433	-0.190246	0.969	-0.0454314	-0.207485	-0.198865	1.55947	+
Q9P2E9	Ribosome-binding protein 1 OS=Homo sapiens GN=RRBP1 PE=1 SV=4	0.969	-0.0454314	-0.200362	0.969	-0.0454314	-0.207485	-0.203924	1.95402	+
P63167	Dynein light chain 1, cytoplasmic OS=Homo sapiens GN=DYNLL1 PE=1 SV=1	0.965	-0.0513992	-0.240931	0.969	-0.0454314	-0.207485	-0.224208	1.32426	+
Q15286	Ras-related protein Rab-35 OS=Homo sapiens GN=RAB35 PE=1 SV=1	0.97	-0.0439433	-0.190246	0.968	-0.046921	-0.217477	-0.203861	1.37207	+
Q9Y3B9	RRP15-like protein OS=Homo sapiens GN=RRP15 PE=1 SV=2	0.969	-0.0454314	-0.200362	0.968	-0.046921	-0.217477	-0.20892	1.58401	+
Q13428	Treacle protein OS=Homo sapiens GN=TCOF1 PE=1 SV=3	0.969	-0.0454314	-0.200362	0.967	-0.0484122	-0.227479	-0.213921	1.39474	+
Q9NWV8	BRISC and BRCA1-A complex member 1 OS=Homo sapiens GN=BABAM1 PE=1 SV=1	0.967	-0.0484122	-0.220625	0.966	-0.0499049	-0.237492	-0.229058	1.63027	+
Q9Y5K5	Ubiquitin carboxyl-terminal hydrolase isozyme L5 OS=Homo sapiens GN=UCHL5 PE=1 SV=3	0.965	-0.0513992	-0.240931	0.965	-0.0513992	-0.247515	-0.244223	2.06643	+
O15226	NF-kappa-B-repressing factor OS=Homo sapiens GN=NKRF PE=1 SV=2	0.963	-0.0543923	-0.261278	0.965	-0.0513992	-0.247515	-0.254397	1.76407	+
P20700	Lamin-B1 OS=Homo sapiens GN=LMNB1 PE=1 SV=2	0.967	-0.0484122	-0.220625	0.964	-0.0528949	-0.257549	-0.239087	1.30926	+
O95391	Pre-mRNA-splicing factor SLU7 OS=Homo sapiens GN=SLU7 PE=1 SV=2	0.962	-0.0558912	-0.271467	0.964	-0.0528949	-0.257549	-0.264508	1.7761	+
P52701	DNA mismatch repair protein Msh6 OS=Homo sapiens GN=MSH6 PE=1 SV=2	0.964	-0.0528949	-0.251099	0.963	-0.0543923	-0.267592	-0.259346	1.69386	+
P53582	Methionine aminopeptidase 1 OS=Homo sapiens GN=METAP1 PE=1 SV=2	0.963	-0.0543923	-0.261278	0.963	-0.0543923	-0.267592	-0.264435	2.11913	+
Q9UIA9	Exportin-7 OS=Homo sapiens GN=XPO7 PE=1 SV=3	0.961	-0.0573917	-0.281667	0.96	-0.0588937	-0.297787	-0.289727	1.75188	+
Q13243	Serine/arginine-rich splicing factor 5 OS=Homo sapiens GN=SRSF5 PE=1 SV=1	0.959	-0.0603973	-0.302099	0.96	-0.0588937	-0.297787	-0.299943	2.33949	+
Q96BD0	Solute carrier organic anion transporter family member 4A1 OS=Homo sapiens GN=SLCO4A1 PE=1 SV=2	0.958	-0.0619024	-0.312331	0.959	-0.0603973	-0.307873	-0.310102	2.33947	+
Q9H9A6	Leucine-rich repeat-containing protein 40 OS=Homo sapiens GN=LRRC40 PE=1 SV=1	0.955	-0.0664274	-0.343092	0.959	-0.0603973	-0.307873	-0.325482	1.46332	+
P15531	Nucleoside diphosphate kinase A OS=Homo sapiens GN=NME1 PE=1 SV=1	0.96	-0.0588937	-0.291878	0.958	-0.0619024	-0.317969	-0.304924	1.56512	+
O14980	Exportin-1 OS=Homo sapiens GN=XPO1 PE=1 SV=1	0.955	-0.0664274	-0.343092	0.958	-0.0619024	-0.317969	-0.33053	1.6165	+
Q99805	Transmembrane 9 superfamily member 2 OS=Homo sapiens GN=TM9SF2 PE=1 SV=1	0.961	-0.0573917	-0.281667	0.957	-0.0634092	-0.328076	-0.304871	1.3155	+
P10644	cAMP-dependent protein kinase type I-alpha regulatory subunit OS=Homo sapiens GN=PRKAR1A PE=1 SV=1	0.954	-0.0679388	-0.353366	0.957	-0.0634092	-0.328076	-0.340721	1.62679	+
Q9UHD9	Ubiquilin-2 OS=Homo sapiens GN=UBQLN2 PE=1 SV=2	0.956	-0.0649175	-0.332828	0.956	-0.0649175	-0.338194	-0.335511	2.29323	+
Q9UBU9	Nuclear RNA export factor 1 OS=Homo sapiens GN=NXF1 PE=1 SV=1	0.959	-0.0603973	-0.302099	0.955	-0.0664274	-0.348321	-0.32521	1.34519	+
P49753	Acyl-coenzyme A thioesterase 2, mitochondrial OS=Homo sapiens GN=ACOT2 PE=1 SV=6	0.958	-0.0619024	-0.312331	0.955	-0.0664274	-0.348321	-0.330326	1.46034	+
P57764	Gasdermin-D OS=Homo sapiens GN=GSDMD PE=1 SV=1	0.954	-0.0679388	-0.353366	0.955	-0.0664274	-0.348321	-0.350844	2.33941	+
P06737	Glycogen phosphorylase, liver form OS=Homo sapiens GN=PYGL PE=1 SV=4	0.95	-0.0740006	-0.394574	0.955	-0.0664274	-0.348321	-0.371448	1.40247	+
Q8WWK9	Cytoskeleton-associated protein 2 OS=Homo sapiens GN=CKAP2 PE=1 SV=1	0.956	-0.0649175	-0.332828	0.954	-0.0679388	-0.35846	-0.345644	1.62719	+
P35520	Cystathionine beta-synthase OS=Homo sapiens GN=CBS PE=1 SV=2	0.955	-0.0664274	-0.343092	0.954	-0.0679388	-0.35846	-0.350776	1.85563	+
Q9NV96	Cell cycle control protein 50A OS=Homo sapiens GN=TMEM30A PE=1 SV=1	0.955	-0.0664274	-0.343092	0.954	-0.0679388	-0.35846	-0.350776	1.85563	+
Q9UBQ0	Vacuolar protein sorting-associated protein 29 OS=Homo sapiens GN=VPS29 PE=1 SV=1	0.954	-0.0679388	-0.353366	0.954	-0.0679388	-0.35846	-0.355913	2.34149	+
Q9BSJ2	Gamma-tubulin complex component 2 OS=Homo sapiens GN=TUBGCP2 PE=1 SV=2	0.948	-0.077041	-0.415243	0.953	-0.0694519	-0.368609	-0.391926	1.42217	+
Q12874	Splicing factor 3A subunit 3 OS=Homo sapiens GN=SF3A3 PE=1 SV=1	0.947	-0.0785637	-0.425593	0.953	-0.0694519	-0.368609	-0.397101	1.34104	+
P35244	Replication protein A 14 kDa subunit OS=Homo sapiens GN=RPA3 PE=1 SV=1	0.956	-0.0649175	-0.332828	0.952	-0.0709665	-0.378769	-0.355798	1.38675	+
Q92616	eIF-2-alpha kinase activator GCN1 OS=Homo sapiens GN=GCN1 PE=1 SV=6	0.947	-0.0785637	-0.425593	0.952	-0.0709665	-0.378769	-0.402181	1.43159	+
Q9BT78	COP9 signalosome complex subunit 4 OS=Homo sapiens GN=COPS4 PE=1 SV=1	0.953	-0.0694519	-0.363652	0.951	-0.0724828	-0.38894	-0.376296	1.66993	+
Q8ND56	Protein LSM14 homolog A OS=Homo sapiens GN=LSM14A PE=1 SV=3	0.946	-0.0800879	-0.435956	0.951	-0.0724828	-0.38894	-0.412448	1.44075	+
P41252	Isoleucine--tRNA ligase, cytoplasmic OS=Homo sapiens GN=IARS PE=1 SV=2	0.948	-0.077041	-0.415243	0.949	-0.07552	-0.409313	-0.412278	2.33931	+
Q9BUL8	Programmed cell death protein 10 OS=Homo sapiens GN=PDCD10 PE=1 SV=1	0.943	-0.0846703	-0.467106	0.949	-0.07552	-0.409313	-0.43821	1.37758	+
Q96RS6	NudC domain-containing protein 1 OS=Homo sapiens GN=NUDCD1 PE=1 SV=2	0.948	-0.077041	-0.415243	0.948	-0.077041	-0.419516	-0.417379	2.48696	+
Q9HBH1	Peptide deformylase, mitochondrial OS=Homo sapiens GN=PDF PE=1 SV=1	0.942	-0.086201	-0.477512	0.948	-0.077041	-0.419516	-0.448514	1.38613	+
Q7RTV0	PHD finger-like domain-containing protein 5A OS=Homo sapiens GN=PHF5A PE=1 SV=1	0.941	-0.0877334	-0.487929	0.948	-0.077041	-0.419516	-0.453722	1.31962	+
O15047	Histone-lysine N-methyltransferase SETD1A OS=Homo sapiens GN=SETD1A PE=1 SV=3	0.948	-0.077041	-0.415243	0.947	-0.0785637	-0.429729	-0.422486	1.96205	+
Q8N5C6	S1 RNA-binding domain-containing protein 1 OS=Homo sapiens GN=SRBD1 PE=1 SV=2	0.946	-0.0800879	-0.435956	0.946	-0.0800879	-0.439954	-0.437955	2.53672	+
Q9H936	Mitochondrial glutamate carrier 1 OS=Homo sapiens GN=SLC25A22 PE=1 SV=1	0.939	-0.0908029	-0.508795	0.946	-0.0800879	-0.439954	-0.474375	1.33618	+
Q9NTJ5	Phosphatidylinositide phosphatase SAC1 OS=Homo sapiens GN=SACM1L PE=1 SV=2	0.945	-0.0816138	-0.446328	0.945	-0.0816138	-0.450189	-0.448258	2.56202	+
O60832	H/ACA ribonucleoprotein complex subunit 4 OS=Homo sapiens GN=DKC1 PE=1 SV=3	0.944	-0.0831412	-0.456712	0.945	-0.0816138	-0.450189	-0.45345	2.33924	+
Q9BTV4	Transmembrane protein 43 OS=Homo sapiens GN=TMEM43 PE=1 SV=1	0.946	-0.0800879	-0.435956	0.944	-0.0831412	-0.460435	-0.448195	1.75993	+
Q2NL82	Pre-rRNA-processing protein TSR1 homolog OS=Homo sapiens GN=TSR1 PE=1 SV=1	0.946	-0.0800879	-0.435956	0.944	-0.0831412	-0.460435	-0.448195	1.75993	+
O00231	26S proteasome non-ATPase regulatory subunit 11 OS=Homo sapiens GN=PSMD11 PE=1 SV=3	0.945	-0.0816138	-0.446328	0.944	-0.0831412	-0.460435	-0.453381	2.00423	+
O00469	Procollagen-lysine,2-oxoglutarate 5-dioxygenase 2 OS=Homo sapiens GN=PLOD2 PE=1 SV=2	0.94	-0.0892673	-0.498357	0.944	-0.0831412	-0.460435	-0.479396	1.59918	+
Q5JTH9	RRP12-like protein OS=Homo sapiens GN=RRP12 PE=1 SV=2	0.94	-0.0892673	-0.498357	0.942	-0.086201	-0.480959	-0.489658	1.94661	+
O75027	ATP-binding cassette sub-family B member 7, mitochondrial OS=Homo sapiens GN=ABCB7 PE=1 SV=2	0.934	-0.0985055	-0.561157	0.942	-0.086201	-0.480959	-0.521058	1.31073	+
P57772	Selenocysteine-specific elongation factor OS=Homo sapiens GN=EEFSEC PE=1 SV=4	0.936	-0.0954196	-0.540179	0.941	-0.0877334	-0.491238	-0.515709	1.5202	+
P52272	Heterogeneous nuclear ribonucleoprotein M OS=Homo sapiens GN=HNRNPM PE=1 SV=3	0.936	-0.0954196	-0.540179	0.94	-0.0892673	-0.501527	-0.520853	1.62689	+
Q14847	LIM and SH3 domain protein 1 OS=Homo sapiens GN=LASP1 PE=1 SV=2	0.933	-0.100051	-0.571663	0.94	-0.0892673	-0.501527	-0.536595	1.38147	+
Q92945	Far upstream element-binding protein 2 OS=Homo sapiens GN=KHSRP PE=1 SV=4	0.935	-0.0969617	-0.550663	0.939	-0.0908029	-0.511828	-0.531245	1.63341	+
Q14244	Ensconsin OS=Homo sapiens GN=MAP7 PE=1 SV=1	0.933	-0.100051	-0.571663	0.939	-0.0908029	-0.511828	-0.541745	1.45443	+
P36871	Phosphoglucomutase-1 OS=Homo sapiens GN=PGM1 PE=1 SV=3	0.943	-0.0846703	-0.467106	0.938	-0.0923402	-0.522139	-0.494623	1.45125	+
P22102	Trifunctional purine biosynthetic protein adenosine-3 OS=Homo sapiens GN=GART PE=1 SV=1	0.931	-0.103147	-0.592709	0.938	-0.0923402	-0.522139	-0.557424	1.39529	+
P30085	UMP-CMP kinase OS=Homo sapiens GN=CMPK1 PE=1 SV=3	0.943	-0.0846703	-0.467106	0.936	-0.0954196	-0.542795	-0.504951	1.32218	+
Q86UP2	Kinectin OS=Homo sapiens GN=KTN1 PE=1 SV=1	0.942	-0.086201	-0.477512	0.936	-0.0954196	-0.542795	-0.510154	1.39064	+
Q13435	Splicing factor 3B subunit 2 OS=Homo sapiens GN=SF3B2 PE=1 SV=2	0.94	-0.0892673	-0.498357	0.936	-0.0954196	-0.542795	-0.520576	1.56614	+
Q9Y314	Nitric oxide synthase-interacting protein OS=Homo sapiens GN=NOSIP PE=1 SV=1	0.934	-0.0985055	-0.561157	0.936	-0.0954196	-0.542795	-0.551976	1.97519	+
Q9NUQ9	Protein FAM49B OS=Homo sapiens GN=FAM49B PE=1 SV=1	0.939	-0.0908029	-0.508795	0.935	-0.0969617	-0.55314	-0.530968	1.57563	+
P30740	Leukocyte elastase inhibitor OS=Homo sapiens GN=SERPINB1 PE=1 SV=1	0.936	-0.0954196	-0.540179	0.935	-0.0969617	-0.55314	-0.546659	2.12227	+
Q9BVJ7	Dual specificity protein phosphatase 23 OS=Homo sapiens GN=DUSP23 PE=1 SV=1	0.934	-0.0985055	-0.561157	0.935	-0.0969617	-0.55314	-0.557148	2.33908	+
Q9BV20	Methylthioribose-1-phosphate isomerase OS=Homo sapiens GN=MRI1 PE=1 SV=1	0.939	-0.0908029	-0.508795	0.933	-0.100051	-0.573862	-0.541329	1.41778	+
Q9NRF9	DNA polymerase epsilon subunit 3 OS=Homo sapiens GN=POLE3 PE=1 SV=1	0.932	-0.101598	-0.582181	0.933	-0.100051	-0.573862	-0.578021	2.33901	+
P42696	RNA-binding protein 34 OS=Homo sapiens GN=RBM34 PE=1 SV=2	0.931	-0.103147	-0.592709	0.933	-0.100051	-0.573862	-0.583286	1.98781	+
P23526	Adenosylhomocysteinase OS=Homo sapiens GN=AHCY PE=1 SV=4	0.936	-0.0954196	-0.540179	0.932	-0.101598	-0.58424	-0.56221	1.60322	+
Q9Y5X2	Sorting nexin-8 OS=Homo sapiens GN=SNX8 PE=1 SV=1	0.931	-0.103147	-0.592709	0.932	-0.101598	-0.58424	-0.588475	2.33903	+
P53396	ATP-citrate synthase OS=Homo sapiens GN=ACLY PE=1 SV=3	0.926	-0.110916	-0.645523	0.932	-0.101598	-0.58424	-0.614881	1.49896	+
P49327	Fatty acid synthase OS=Homo sapiens GN=FASN PE=1 SV=3	0.938	-0.0923402	-0.519245	0.931	-0.103147	-0.594629	-0.556937	1.36634	+
P78347	General transcription factor II-I OS=Homo sapiens GN=GTF2I PE=1 SV=2	0.935	-0.0969617	-0.550663	0.931	-0.103147	-0.594629	-0.572646	1.61213	+
Q15021	Condensin complex subunit 1 OS=Homo sapiens GN=NCAPD2 PE=1 SV=3	0.931	-0.103147	-0.592709	0.931	-0.103147	-0.594629	-0.593669	2.98756	+
Q15428	Splicing factor 3A subunit 2 OS=Homo sapiens GN=SF3A2 PE=1 SV=2	0.927	-0.109359	-0.634937	0.931	-0.103147	-0.594629	-0.614783	1.68063	+
Q9Y4E8	Ubiquitin carboxyl-terminal hydrolase 15 OS=Homo sapiens GN=USP15 PE=1 SV=3	0.937	-0.093879	-0.529707	0.93	-0.104697	-0.605029	-0.567368	1.37473	+
Q9HC35	Echinoderm microtubule-associated protein-like 4 OS=Homo sapiens GN=EML4 PE=1 SV=3	0.937	-0.093879	-0.529707	0.93	-0.104697	-0.605029	-0.567368	1.37473	+
O75153	Clustered mitochondria protein homolog OS=Homo sapiens GN=CLUH PE=1 SV=2	0.925	-0.112475	-0.656119	0.93	-0.104697	-0.605029	-0.630574	1.58878	+
P39656	Dolichyl-diphosphooligosaccharide--protein glycosyltransferase 48 kDa subunit OS=Homo sapiens GN=DDOST PE=1 SV=4	0.922	-0.117161	-0.687979	0.93	-0.104697	-0.605029	-0.646504	1.3895	+
Q9BW83	Intraflagellar transport protein 27 homolog OS=Homo sapiens GN=IFT27 PE=1 SV=1	0.93	-0.104697	-0.603249	0.929	-0.106249	-0.61544	-0.609345	2.196	+
P11766	Alcohol dehydrogenase class-3 OS=Homo sapiens GN=ADH5 PE=1 SV=4	0.922	-0.117161	-0.687979	0.929	-0.106249	-0.61544	-0.651709	1.45108	+
Q9BR76	Coronin-1B OS=Homo sapiens GN=CORO1B PE=1 SV=1	0.934	-0.0985055	-0.561157	0.928	-0.107803	-0.625863	-0.59351	1.46007	+
Q92499	ATP-dependent RNA helicase DDX1 OS=Homo sapiens GN=DDX1 PE=1 SV=2	0.925	-0.112475	-0.656119	0.928	-0.107803	-0.625863	-0.640991	1.82327	+
Q15382	GTP-binding protein Rheb OS=Homo sapiens GN=RHEB PE=1 SV=1	0.92	-0.120294	-0.709276	0.928	-0.107803	-0.625863	-0.667569	1.40098	+
Q99933	BAG family molecular chaperone regulator 1 OS=Homo sapiens GN=BAG1 PE=1 SV=4	0.935	-0.0969617	-0.550663	0.927	-0.109359	-0.636297	-0.59348	1.33866	+
P39023	60S ribosomal protein L3 OS=Homo sapiens GN=RPL3 PE=1 SV=2	0.921	-0.118727	-0.698622	0.927	-0.109359	-0.636297	-0.667459	1.52723	+
Q9NRG4	N-lysine methyltransferase SMYD2 OS=Homo sapiens GN=SMYD2 PE=1 SV=2	0.931	-0.103147	-0.592709	0.926	-0.110916	-0.646741	-0.619725	1.55697	+
Q8NEF9	Serum response factor-binding protein 1 OS=Homo sapiens GN=SRFBP1 PE=1 SV=1	0.933	-0.100051	-0.571663	0.925	-0.112475	-0.657198	-0.61443	1.35418	+
Q07065	Cytoskeleton-associated protein 4 OS=Homo sapiens GN=CKAP4 PE=1 SV=2	0.927	-0.109359	-0.634937	0.925	-0.112475	-0.657198	-0.646067	1.95994	+
P21266	Glutathione S-transferase Mu 3 OS=Homo sapiens GN=GSTM3 PE=1 SV=3	0.921	-0.118727	-0.698622	0.925	-0.112475	-0.657198	-0.67791	1.7112	+
Q9Y3L5	Ras-related protein Rap-2c OS=Homo sapiens GN=RAP2C PE=1 SV=1	0.933	-0.100051	-0.571663	0.924	-0.114035	-0.667665	-0.619664	1.30789	+
Q9NP58	ATP-binding cassette sub-family B member 6, mitochondrial OS=Homo sapiens GN=ABCB6 PE=1 SV=1	0.933	-0.100051	-0.571663	0.924	-0.114035	-0.667665	-0.619664	1.30789	+
Q9Y224	UPF0568 protein C14orf166 OS=Homo sapiens GN=C14orf166 PE=1 SV=1	0.93	-0.104697	-0.603249	0.924	-0.114035	-0.667665	-0.635457	1.49162	+
O43752	Syntaxin-6 OS=Homo sapiens GN=STX6 PE=1 SV=1	0.925	-0.112475	-0.656119	0.924	-0.114035	-0.667665	-0.661892	2.25552	+
Q9H9Q2	COP9 signalosome complex subunit 7b OS=Homo sapiens GN=COPS7B PE=1 SV=1	0.915	-0.128156	-0.762722	0.924	-0.114035	-0.667665	-0.715194	1.37423	+
Q8IZL8	Proline-, glutamic acid- and leucine-rich protein 1 OS=Homo sapiens GN=PELP1 PE=1 SV=2	0.929	-0.106249	-0.6138	0.922	-0.117161	-0.688635	-0.651218	1.43725	+
P51659	Peroxisomal multifunctional enzyme type 2 OS=Homo sapiens GN=HSD17B4 PE=1 SV=3	0.917	-0.125006	-0.741309	0.921	-0.118727	-0.699136	-0.720223	1.72971	+
Q9H4I3	TraB domain-containing protein OS=Homo sapiens GN=TRABD PE=1 SV=1	0.929	-0.106249	-0.6138	0.92	-0.120294	-0.709649	-0.661725	1.337	+
P50995	Annexin A11 OS=Homo sapiens GN=ANXA11 PE=1 SV=1	0.925	-0.112475	-0.656119	0.92	-0.120294	-0.709649	-0.682884	1.60312	+
Q14152	Eukaryotic translation initiation factor 3 subunit A OS=Homo sapiens GN=EIF3A PE=1 SV=1	0.917	-0.125006	-0.741309	0.92	-0.120294	-0.709649	-0.725479	1.85734	+
Q16658	Fascin OS=Homo sapiens GN=FSCN1 PE=1 SV=3	0.914	-0.129734	-0.773447	0.92	-0.120294	-0.709649	-0.741548	1.56275	+
P15927	Replication protein A 32 kDa subunit OS=Homo sapiens GN=RPA2 PE=1 SV=1	0.912	-0.132894	-0.79493	0.92	-0.120294	-0.709649	-0.75229	1.44315	+
P13489	Ribonuclease inhibitor OS=Homo sapiens GN=RNH1 PE=1 SV=2	0.925	-0.112475	-0.656119	0.919	-0.121863	-0.720174	-0.688146	1.5286	+
Q96AQ6	Pre-B-cell leukemia transcription factor-interacting protein 1 OS=Homo sapiens GN=PBXIP1 PE=1 SV=1	0.923	-0.115597	-0.677348	0.918	-0.123434	-0.73071	-0.704029	1.61771	+
Q9Y6E2	Basic leucine zipper and W2 domain-containing protein 2 OS=Homo sapiens GN=BZW2 PE=1 SV=1	0.919	-0.121863	-0.719942	0.918	-0.123434	-0.73071	-0.725326	2.32554	+
P18858	DNA ligase 1 OS=Homo sapiens GN=LIG1 PE=1 SV=1	0.915	-0.128156	-0.762722	0.918	-0.123434	-0.73071	-0.746716	1.86506	+
P00387	NADH-cytochrome b5 reductase 3 OS=Homo sapiens GN=CYB5R3 PE=1 SV=3	0.912	-0.132894	-0.79493	0.918	-0.123434	-0.73071	-0.76282	1.57216	+
P15880	40S ribosomal protein S2 OS=Homo sapiens GN=RPS2 PE=1 SV=2	0.912	-0.132894	-0.79493	0.917	-0.125006	-0.741257	-0.768094	1.65298	+
Q13620	Cullin-4B OS=Homo sapiens GN=CUL4B PE=1 SV=4	0.921	-0.118727	-0.698622	0.916	-0.12658	-0.751816	-0.725219	1.63195	+
P28074	Proteasome subunit beta type-5 OS=Homo sapiens GN=PSMB5 PE=1 SV=3	0.919	-0.121863	-0.719942	0.916	-0.12658	-0.751816	-0.735879	1.86058	+
Q16851	UTP--glucose-1-phosphate uridylyltransferase OS=Homo sapiens GN=UGP2 PE=1 SV=5	0.917	-0.125006	-0.741309	0.915	-0.128156	-0.762387	-0.751848	2.04948	+
P20585	DNA mismatch repair protein Msh3 OS=Homo sapiens GN=MSH3 PE=1 SV=4	0.923	-0.115597	-0.677348	0.914	-0.129734	-0.772969	-0.725158	1.37766	+
P49257	Protein ERGIC-53 OS=Homo sapiens GN=LMAN1 PE=1 SV=2	0.917	-0.125006	-0.741309	0.914	-0.129734	-0.772969	-0.757139	1.87587	+
P62495	Eukaryotic peptide chain release factor subunit 1 OS=Homo sapiens GN=ETF1 PE=1 SV=3	0.916	-0.12658	-0.75201	0.914	-0.129734	-0.772969	-0.762489	2.05803	+
Q9NZ45	CDGSH iron-sulfur domain-containing protein 1 OS=Homo sapiens GN=CISD1 PE=1 SV=1	0.908	-0.139236	-0.83804	0.914	-0.129734	-0.772969	-0.805505	1.59007	+
Q01433	AMP deaminase 2 OS=Homo sapiens GN=AMPD2 PE=1 SV=2	0.907	-0.140826	-0.848847	0.914	-0.129734	-0.772969	-0.810908	1.52632	+
P20674	Cytochrome c oxidase subunit 5A, mitochondrial OS=Homo sapiens GN=COX5A PE=1 SV=2	0.905	-0.14401	-0.870497	0.914	-0.129734	-0.772969	-0.821733	1.42326	+
P15924	Desmoplakin OS=Homo sapiens GN=DSP PE=1 SV=3	0.902	-0.148801	-0.903061	0.914	-0.129734	-0.772969	-0.838015	1.30702	+
P36952	Serpin B5 OS=Homo sapiens GN=SERPINB5 PE=1 SV=2	0.921	-0.118727	-0.698622	0.913	-0.131313	-0.783563	-0.741092	1.43838	+
Q13011	Delta(3,5)-Delta(2,4)-dienoyl-CoA isomerase, mitochondrial OS=Homo sapiens GN=ECH1 PE=1 SV=2	0.912	-0.132894	-0.79493	0.913	-0.131313	-0.783563	-0.789247	2.3387	+
Q9NYU2	UDP-glucose:glycoprotein glucosyltransferase 1 OS=Homo sapiens GN=UGGT1 PE=1 SV=3	0.901	-0.150401	-0.91394	0.912	-0.132894	-0.794168	-0.854054	1.35099	+
P26885	Peptidyl-prolyl cis-trans isomerase FKBP2 OS=Homo sapiens GN=FKBP2 PE=1 SV=2	0.9	-0.152003	-0.924832	0.912	-0.132894	-0.794168	-0.8595	1.31607	+
Q9HB07	UPF0160 protein MYG1, mitochondrial OS=Homo sapiens GN=C12orf10 PE=1 SV=2	0.919	-0.121863	-0.719942	0.911	-0.134477	-0.804785	-0.762363	1.45114	+
Q8WUY1	Protein THEM6 OS=Homo sapiens GN=THEM6 PE=1 SV=2	0.919	-0.121863	-0.719942	0.911	-0.134477	-0.804785	-0.762363	1.45114	+
P56545	C-terminal-binding protein 2 OS=Homo sapiens GN=CTBP2 PE=1 SV=1	0.917	-0.125006	-0.741309	0.911	-0.134477	-0.804785	-0.773047	1.58299	+
P53985	Monocarboxylate transporter 1 OS=Homo sapiens GN=SLC16A1 PE=1 SV=3	0.918	-0.123434	-0.73062	0.91	-0.136062	-0.815413	-0.773016	1.45741	+
P50570	Dynamin-2 OS=Homo sapiens GN=DNM2 PE=1 SV=2	0.916	-0.12658	-0.75201	0.91	-0.136062	-0.815413	-0.783711	1.58943	+
P13798	Acylamino-acid-releasing enzyme OS=Homo sapiens GN=APEH PE=1 SV=4	0.915	-0.128156	-0.762722	0.91	-0.136062	-0.815413	-0.789068	1.67269	+
Q9BTW9	Tubulin-specific chaperone D OS=Homo sapiens GN=TBCD PE=1 SV=2	0.912	-0.132894	-0.79493	0.91	-0.136062	-0.815413	-0.805172	2.09168	+
Q9NXW2	DnaJ homolog subfamily B member 12 OS=Homo sapiens GN=DNAJB12 PE=1 SV=4	0.911	-0.134477	-0.80569	0.91	-0.136062	-0.815413	-0.810551	2.41813	+
O60573	Eukaryotic translation initiation factor 4E type 2 OS=Homo sapiens GN=EIF4E2 PE=1 SV=1	0.902	-0.148801	-0.903061	0.91	-0.136062	-0.815413	-0.859237	1.4889	+
P30520	Adenylosuccinate synthetase isozyme 2 OS=Homo sapiens GN=ADSS PE=1 SV=3	0.915	-0.128156	-0.762722	0.909	-0.137648	-0.826054	-0.794388	1.59579	+
P62910	60S ribosomal protein L32 OS=Homo sapiens GN=RPL32 PE=1 SV=2	0.9	-0.152003	-0.924832	0.909	-0.137648	-0.826054	-0.875443	1.44518	+
O95433	Activator of 90 kDa heat shock protein ATPase homolog 1 OS=Homo sapiens GN=AHSA1 PE=1 SV=1	0.895	-0.16004	-0.979469	0.908	-0.139236	-0.836706	-0.908087	1.30155	+
Q5T653	39S ribosomal protein L2, mitochondrial OS=Homo sapiens GN=MRPL2 PE=1 SV=2	0.914	-0.129734	-0.773447	0.907	-0.140826	-0.847369	-0.810408	1.53738	+
Q9P0L0	Vesicle-associated membrane protein-associated protein A OS=Homo sapiens GN=VAPA PE=1 SV=3	0.914	-0.129734	-0.773447	0.906	-0.142417	-0.858045	-0.815746	1.48173	+
P35573	Glycogen debranching enzyme OS=Homo sapiens GN=AGL PE=1 SV=3	0.913	-0.131313	-0.784183	0.906	-0.142417	-0.858045	-0.821114	1.54343	+
Q9ULA0	Aspartyl aminopeptidase OS=Homo sapiens GN=DNPEP PE=1 SV=1	0.912	-0.132894	-0.79493	0.906	-0.142417	-0.858045	-0.826488	1.61447	+
Q92905	COP9 signalosome complex subunit 5 OS=Homo sapiens GN=COPS5 PE=1 SV=4	0.905	-0.14401	-0.870497	0.906	-0.142417	-0.858045	-0.864271	2.33855	+
Q15477	Helicase SKI2W OS=Homo sapiens GN=SKIV2L PE=1 SV=3	0.904	-0.145605	-0.88134	0.906	-0.142417	-0.858045	-0.869692	2.06927	+
P07099	Epoxide hydrolase 1 OS=Homo sapiens GN=EPHX1 PE=1 SV=1	0.9	-0.152003	-0.924832	0.906	-0.142417	-0.858045	-0.891438	1.62275	+
Q96L91	E1A-binding protein p400 OS=Homo sapiens GN=EP400 PE=1 SV=4	0.897	-0.15682	-0.957577	0.906	-0.142417	-0.858045	-0.907811	1.45761	+
Q6NXR4	TELO2-interacting protein 2 OS=Homo sapiens GN=TTI2 PE=1 SV=1	0.913	-0.131313	-0.784183	0.905	-0.14401	-0.868732	-0.826458	1.48764	+
P63173	60S ribosomal protein L38 OS=Homo sapiens GN=RPL38 PE=1 SV=2	0.909	-0.137648	-0.827245	0.904	-0.145605	-0.879431	-0.853338	1.71085	+
P53041	Serine/threonine-protein phosphatase 5 OS=Homo sapiens GN=PPP5C PE=1 SV=1	0.908	-0.139236	-0.83804	0.904	-0.145605	-0.879431	-0.858736	1.81419	+
O75874	Isocitrate dehydrogenase [NADP] cytoplasmic OS=Homo sapiens GN=IDH1 PE=1 SV=2	0.909	-0.137648	-0.827245	0.903	-0.147202	-0.890142	-0.858693	1.63255	+
P62266	40S ribosomal protein S23 OS=Homo sapiens GN=RPS23 PE=1 SV=3	0.901	-0.150401	-0.91394	0.903	-0.147202	-0.890142	-0.902041	2.07586	+
Q8NFQ8	Torsin-1A-interacting protein 2 OS=Homo sapiens GN=TOR1AIP2 PE=1 SV=1	0.89	-0.168123	-1.03441	0.903	-0.147202	-0.890142	-0.962277	1.32208	+
Q96CB8	Integrator complex subunit 12 OS=Homo sapiens GN=INTS12 PE=1 SV=1	0.91	-0.136062	-0.816461	0.902	-0.148801	-0.900865	-0.858663	1.50496	+
Q92882	Osteoclast-stimulating factor 1 OS=Homo sapiens GN=OSTF1 PE=1 SV=2	0.892	-0.164884	-1.0124	0.901	-0.150401	-0.911599	-0.961998	1.47727	+
P48556	26S proteasome non-ATPase regulatory subunit 8 OS=Homo sapiens GN=PSMD8 PE=1 SV=2	0.911	-0.134477	-0.80569	0.9	-0.152003	-0.922346	-0.864018	1.36742	+
O60232	Sjoegren syndrome/scleroderma autoantigen 1 OS=Homo sapiens GN=SSSCA1 PE=1 SV=1	0.906	-0.142417	-0.859666	0.9	-0.152003	-0.922346	-0.891006	1.65008	+
Q96S66	Chloride channel CLIC-like protein 1 OS=Homo sapiens GN=CLCC1 PE=1 SV=1	0.895	-0.16004	-0.979469	0.9	-0.152003	-0.922346	-0.950908	1.71861	+
P09382	Galectin-1 OS=Homo sapiens GN=LGALS1 PE=1 SV=2	0.895	-0.16004	-0.979469	0.899	-0.153607	-0.933105	-0.956287	1.81164	+
Q9H8H3	Methyltransferase-like protein 7A OS=Homo sapiens GN=METTL7A PE=1 SV=1	0.91	-0.136062	-0.816461	0.898	-0.155213	-0.943875	-0.880168	1.33726	+
Q9BSC4	Nucleolar protein 10 OS=Homo sapiens GN=NOL10 PE=1 SV=1	0.898	-0.155213	-0.94665	0.898	-0.155213	-0.943875	-0.945262	3.02948	+
P17931	Galectin-3 OS=Homo sapiens GN=LGALS3 PE=1 SV=5	0.896	-0.158429	-0.968517	0.898	-0.155213	-0.943875	-0.956196	2.08605	+
P07741	Adenine phosphoribosyltransferase OS=Homo sapiens GN=APRT PE=1 SV=2	0.884	-0.177882	-1.10075	0.898	-0.155213	-0.943875	-1.02231	1.31202	+
Q14247	Src substrate cortactin OS=Homo sapiens GN=CTTN PE=1 SV=2	0.89	-0.168123	-1.03441	0.897	-0.15682	-0.954657	-0.994535	1.59325	+
Q9UNE7	E3 ubiquitin-protein ligase CHIP OS=Homo sapiens GN=STUB1 PE=1 SV=2	0.893	-0.163268	-1.00141	0.896	-0.158429	-0.965452	-0.98343	1.93416	+
P53701	Cytochrome c-type heme lyase OS=Homo sapiens GN=HCCS PE=1 SV=1	0.889	-0.169745	-1.04544	0.895	-0.16004	-0.976259	-1.01085	1.66203	+
Q12789	General transcription factor 3C polypeptide 1 OS=Homo sapiens GN=GTF3C1 PE=1 SV=4	0.898	-0.155213	-0.94665	0.894	-0.161653	-0.987078	-0.966864	1.8759	+
P14923	Junction plakoglobin OS=Homo sapiens GN=JUP PE=1 SV=3	0.89	-0.168123	-1.03441	0.894	-0.161653	-0.987078	-1.01074	1.82669	+
P51153	Ras-related protein Rab-13 OS=Homo sapiens GN=RAB13 PE=1 SV=1	0.889	-0.169745	-1.04544	0.894	-0.161653	-0.987078	-1.01626	1.73815	+
Q6DD88	Atlastin-3 OS=Homo sapiens GN=ATL3 PE=1 SV=1	0.884	-0.177882	-1.10075	0.894	-0.161653	-0.987078	-1.04392	1.46058	+
Q01518	Adenylyl cyclase-associated protein 1 OS=Homo sapiens GN=CAP1 PE=1 SV=5	0.898	-0.155213	-0.94665	0.892	-0.164884	-1.00875	-0.9777	1.6944	+
Q15287	RNA-binding protein with serine-rich domain 1 OS=Homo sapiens GN=RNPS1 PE=1 SV=1	0.882	-0.181149	-1.12297	0.892	-0.164884	-1.00875	-1.06586	1.46754	+
P49711	Transcriptional repressor CTCF OS=Homo sapiens GN=CTCF PE=1 SV=1	0.896	-0.158429	-0.968517	0.891	-0.166503	-1.01961	-0.994062	1.78632	+
Q96DG6	Carboxymethylenebutenolidase homolog OS=Homo sapiens GN=CMBL PE=1 SV=1	0.885	-0.176251	-1.08967	0.891	-0.166503	-1.01961	-1.05464	1.67495	+
P53597	Succinyl-CoA ligase [ADP/GDP-forming] subunit alpha, mitochondrial OS=Homo sapiens GN=SUCLG1 PE=1 SV=4	0.898	-0.155213	-0.94665	0.888	-0.171368	-1.05224	-0.999447	1.47367	+
Q9Y3A6	Transmembrane emp24 domain-containing protein 5 OS=Homo sapiens GN=TMED5 PE=1 SV=1	0.891	-0.166503	-1.0234	0.888	-0.171368	-1.05224	-1.03782	2.05322	+
O60547	GDP-mannose 4,6 dehydratase OS=Homo sapiens GN=GMDS PE=1 SV=1	0.887	-0.172994	-1.06753	0.888	-0.171368	-1.05224	-1.05989	2.33825	+
Q14974	Importin subunit beta-1 OS=Homo sapiens GN=KPNB1 PE=1 SV=2	0.885	-0.176251	-1.08967	0.888	-0.171368	-1.05224	-1.07095	1.95386	+
Q9BTD8	RNA-binding protein 42 OS=Homo sapiens GN=RBM42 PE=1 SV=1	0.896	-0.158429	-0.968517	0.887	-0.172994	-1.06315	-1.01583	1.52825	+
Q15435	Protein phosphatase 1 regulatory subunit 7 OS=Homo sapiens GN=PPP1R7 PE=1 SV=1	0.893	-0.163268	-1.00141	0.887	-0.172994	-1.06315	-1.03228	1.72051	+
Q14134	Tripartite motif-containing protein 29 OS=Homo sapiens GN=TRIM29 PE=1 SV=2	0.897	-0.15682	-0.957577	0.886	-0.174621	-1.07407	-1.01582	1.43816	+
P82930	28S ribosomal protein S34, mitochondrial OS=Homo sapiens GN=MRPS34 PE=1 SV=2	0.886	-0.174621	-1.07859	0.886	-0.174621	-1.07407	-1.07633	2.87353	+
O15427	Monocarboxylate transporter 4 OS=Homo sapiens GN=SLC16A3 PE=1 SV=1	0.895	-0.16004	-0.979469	0.885	-0.176251	-1.08499	-1.03223	1.48795	+
Q7Z7H5	Transmembrane emp24 domain-containing protein 4 OS=Homo sapiens GN=TMED4 PE=1 SV=1	0.886	-0.174621	-1.07859	0.885	-0.176251	-1.08499	-1.08179	2.72485	+
Q8IYB7	DIS3-like exonuclease 2 OS=Homo sapiens GN=DIS3L2 PE=1 SV=4	0.888	-0.171368	-1.05648	0.884	-0.177882	-1.09593	-1.07621	1.93295	+
P06744	Glucose-6-phosphate isomerase OS=Homo sapiens GN=GPI PE=1 SV=4	0.891	-0.166503	-1.0234	0.883	-0.179515	-1.10689	-1.06514	1.60315	+
Q5SSJ5	Heterochromatin protein 1-binding protein 3 OS=Homo sapiens GN=HP1BP3 PE=1 SV=1	0.871	-0.199255	-1.24605	0.882	-0.181149	-1.11785	-1.18195	1.4623	+
Q86X55	Histone-arginine methyltransferase CARM1 OS=Homo sapiens GN=CARM1 PE=1 SV=3	0.886	-0.174621	-1.07859	0.88	-0.184425	-1.13982	-1.10921	1.75529	+
Q16626	Male-enhanced antigen 1 OS=Homo sapiens GN=MEA1 PE=1 SV=2	0.871	-0.199255	-1.24605	0.88	-0.184425	-1.13982	-1.19294	1.54782	+
P62249	40S ribosomal protein S16 OS=Homo sapiens GN=RPS16 PE=1 SV=2	0.868	-0.204233	-1.27989	0.88	-0.184425	-1.13982	-1.20986	1.43404	+
Q15118	[Pyruvate dehydrogenase (acetyl-transferring)] kinase isozyme 1, mitochondrial OS=Homo sapiens GN=PDK1 PE=1 SV=1	0.886	-0.174621	-1.07859	0.877	-0.189351	-1.17287	-1.12573	1.57442	+
Q9H8Y8	Golgi reassembly-stacking protein 2 OS=Homo sapiens GN=GORASP2 PE=1 SV=3	0.88	-0.184425	-1.14523	0.876	-0.190997	-1.18391	-1.16457	1.97587	+
Q9NRN7	L-aminoadipate-semialdehyde dehydrogenase-phosphopantetheinyl transferase OS=Homo sapiens GN=AASDHPPT PE=1 SV=2	0.877	-0.189351	-1.17872	0.875	-0.192645	-1.19496	-1.18684	2.36092	+
P49755	Transmembrane emp24 domain-containing protein 10 OS=Homo sapiens GN=TMED10 PE=1 SV=2	0.877	-0.189351	-1.17872	0.871	-0.199255	-1.2393	-1.20901	1.79733	+
P00813	Adenosine deaminase OS=Homo sapiens GN=ADA PE=1 SV=3	0.862	-0.21424	-1.34792	0.87	-0.200913	-1.25042	-1.29917	1.62204	+
Q9P013	Spliceosome-associated protein CWC15 homolog OS=Homo sapiens GN=CWC15 PE=1 SV=2	0.886	-0.174621	-1.07859	0.869	-0.202572	-1.26155	-1.17007	1.30388	+
Q9Y4G6	Talin-2 OS=Homo sapiens GN=TLN2 PE=1 SV=4	0.862	-0.21424	-1.34792	0.869	-0.202572	-1.26155	-1.30473	1.67649	+
P35221	Catenin alpha-1 OS=Homo sapiens GN=CTNNA1 PE=1 SV=1	0.872	-0.1976	-1.2348	0.868	-0.204233	-1.27269	-1.25375	2.01678	+
Q92572	AP-3 complex subunit sigma-1 OS=Homo sapiens GN=AP3S1 PE=1 SV=1	0.856	-0.224317	-1.41642	0.867	-0.205896	-1.28385	-1.35013	1.50543	+
P57081	tRNA (guanine-N(7)-)-methyltransferase non-catalytic subunit WDR4 OS=Homo sapiens GN=WDR4 PE=1 SV=2	0.883	-0.179515	-1.11185	0.866	-0.207561	-1.29502	-1.20344	1.31557	+
O15321	Transmembrane 9 superfamily member 1 OS=Homo sapiens GN=TM9SF1 PE=2 SV=2	0.883	-0.179515	-1.11185	0.866	-0.207561	-1.29502	-1.20344	1.31557	+
Q9BQ70	Transcription factor 25 OS=Homo sapiens GN=TCF25 PE=1 SV=1	0.86	-0.217591	-1.3707	0.866	-0.207561	-1.29502	-1.33286	1.74307	+
Q9NVS9	Pyridoxine-5'-phosphate oxidase OS=Homo sapiens GN=PNPO PE=1 SV=1	0.88	-0.184425	-1.14523	0.865	-0.209228	-1.3062	-1.22571	1.37942	+
O14602	Eukaryotic translation initiation factor 1A, Y-chromosomal OS=Homo sapiens GN=EIF1AY PE=1 SV=4	0.853	-0.229382	-1.45085	0.862	-0.21424	-1.33982	-1.39534	1.59661	+
P56589	Peroxisomal biogenesis factor 3 OS=Homo sapiens GN=PEX3 PE=1 SV=1	0.85	-0.234465	-1.48541	0.861	-0.215915	-1.35105	-1.41823	1.52098	+
Q9BVM2	Protein DPCD OS=Homo sapiens GN=DPCD PE=1 SV=2	0.852	-0.231075	-1.46236	0.86	-0.217591	-1.3623	-1.41233	1.64702	+
Q96KC8	DnaJ homolog subfamily C member 1 OS=Homo sapiens GN=DNAJC1 PE=1 SV=1	0.873	-0.195946	-1.22356	0.859	-0.21927	-1.37356	-1.29856	1.435	+
Q9BT22	Chitobiosyldiphosphodolichol beta-mannosyltransferase OS=Homo sapiens GN=ALG1 PE=1 SV=2	0.871	-0.199255	-1.24605	0.859	-0.21927	-1.37356	-1.3098	1.50916	+
Q92522	Histone H1x OS=Homo sapiens GN=H1FX PE=1 SV=1	0.866	-0.207561	-1.30251	0.859	-0.21927	-1.37356	-1.33804	1.77218	+
P61970	Nuclear transport factor 2 OS=Homo sapiens GN=NUTF2 PE=1 SV=1	0.852	-0.231075	-1.46236	0.859	-0.21927	-1.37356	-1.41796	1.70055	+
Q8N5K1	CDGSH iron-sulfur domain-containing protein 2 OS=Homo sapiens GN=CISD2 PE=1 SV=1	0.849	-0.236164	-1.49695	0.859	-0.21927	-1.37356	-1.43525	1.56306	+
Q8IXB1	DnaJ homolog subfamily C member 10 OS=Homo sapiens GN=DNAJC10 PE=1 SV=2	0.847	-0.239566	-1.52008	0.858	-0.22095	-1.38483	-1.45246	1.52843	+
O43776	Asparagine--tRNA ligase, cytoplasmic OS=Homo sapiens GN=NARS PE=1 SV=1	0.874	-0.194295	-1.21233	0.857	-0.222633	-1.39612	-1.30422	1.3489	+
Q15056	Eukaryotic translation initiation factor 4H OS=Homo sapiens GN=EIF4H PE=1 SV=5	0.846	-0.24127	-1.53167	0.857	-0.222633	-1.39612	-1.46389	1.53087	+
P23921	Ribonucleoside-diphosphate reductase large subunit OS=Homo sapiens GN=RRM1 PE=1 SV=1	0.836	-0.258425	-1.64828	0.855	-0.226004	-1.41873	-1.53351	1.32275	+
Q15363	Transmembrane emp24 domain-containing protein 2 OS=Homo sapiens GN=TMED2 PE=1 SV=1	0.86	-0.217591	-1.3707	0.852	-0.231075	-1.45274	-1.41172	1.73297	+
Q16864	V-type proton ATPase subunit F OS=Homo sapiens GN=ATP6V1F PE=1 SV=2	0.849	-0.236164	-1.49695	0.852	-0.231075	-1.45274	-1.47485	2.02043	+
P15586	N-acetylglucosamine-6-sulfatase OS=Homo sapiens GN=GNS PE=1 SV=3	0.861	-0.215915	-1.3593	0.851	-0.232769	-1.46411	-1.4117	1.6267	+
Q96C57	Uncharacterized protein C12orf43 OS=Homo sapiens GN=C12orf43 PE=1 SV=2	0.849	-0.236164	-1.49695	0.851	-0.232769	-1.46411	-1.48053	2.15114	+
Q3KR37	GRAM domain-containing protein 1B OS=Homo sapiens GN=GRAMD1B PE=1 SV=1	0.865	-0.209228	-1.31384	0.85	-0.234465	-1.47549	-1.39466	1.43355	+
O75718	Cartilage-associated protein OS=Homo sapiens GN=CRTAP PE=1 SV=1	0.839	-0.253257	-1.61315	0.849	-0.236164	-1.48688	-1.55002	1.58641	+
O43324	Eukaryotic translation elongation factor 1 epsilon-1 OS=Homo sapiens GN=EEF1E1 PE=1 SV=1	0.838	-0.254978	-1.62485	0.84	-0.251539	-1.59001	-1.60743	2.16125	+
P06865	Beta-hexosaminidase subunit alpha OS=Homo sapiens GN=HEXA PE=1 SV=2	0.824	-0.279284	-1.79008	0.838	-0.254978	-1.61308	-1.70158	1.48042	+
Q9H4L4	Sentrin-specific protease 3 OS=Homo sapiens GN=SENP3 PE=1 SV=2	0.827	-0.274041	-1.75444	0.837	-0.2567	-1.62463	-1.68954	1.61185	+
Q9NRX4	14 kDa phosphohistidine phosphatase OS=Homo sapiens GN=PHPT1 PE=1 SV=1	0.839	-0.253257	-1.61315	0.836	-0.258425	-1.6362	-1.62468	2.34524	+
Q9Y394	Dehydrogenase/reductase SDR family member 7 OS=Homo sapiens GN=DHRS7 PE=1 SV=1	0.832	-0.265345	-1.69532	0.835	-0.260152	-1.64779	-1.67155	2.04329	+
P54760	Ephrin type-B receptor 4 OS=Homo sapiens GN=EPHB4 PE=1 SV=2	0.827	-0.274041	-1.75444	0.834	-0.261881	-1.65938	-1.70691	1.7515	+
Q96BK5	PIN2/TERF1-interacting telomerase inhibitor 1 OS=Homo sapiens GN=PINX1 PE=1 SV=2	0.843	-0.246395	-1.56651	0.825	-0.277534	-1.76438	-1.66544	1.4228	+
A6NKF1	SAC3 domain-containing protein 1 OS=Homo sapiens GN=SAC3D1 PE=1 SV=2	0.832	-0.265345	-1.69532	0.825	-0.277534	-1.76438	-1.72985	1.89598	+
P11413	Glucose-6-phosphate 1-dehydrogenase OS=Homo sapiens GN=G6PD PE=1 SV=4	0.838	-0.254978	-1.62485	0.824	-0.279284	-1.77612	-1.70048	1.54826	+
P08047	Transcription factor Sp1 OS=Homo sapiens GN=SP1 PE=1 SV=3	0.835	-0.260152	-1.66002	0.824	-0.279284	-1.77612	-1.71807	1.66754	+
Q9Y6Y0	Influenza virus NS1A-binding protein OS=Homo sapiens GN=IVNS1ABP PE=1 SV=3	0.842	-0.248108	-1.57815	0.818	-0.289827	-1.84684	-1.71249	1.30241	+
O95881	Thioredoxin domain-containing protein 12 OS=Homo sapiens GN=TXNDC12 PE=1 SV=1	0.806	-0.311148	-2.00669	0.818	-0.289827	-1.84684	-1.92677	1.57851	+
Q9Y624	Junctional adhesion molecule A OS=Homo sapiens GN=F11R PE=1 SV=1	0.818	-0.289827	-1.86175	0.812	-0.300448	-1.91809	-1.88992	2.02286	+
Q00765	Receptor expression-enhancing protein 5 OS=Homo sapiens GN=REEP5 PE=1 SV=3	0.827	-0.274041	-1.75444	0.81	-0.304006	-1.94195	-1.84819	1.49123	+
P63220	40S ribosomal protein S21 OS=Homo sapiens GN=RPS21 PE=1 SV=1	0.825	-0.277534	-1.77818	0.806	-0.311148	-1.98986	-1.88402	1.44702	+
Q9H7B2	Ribosome production factor 2 homolog OS=Homo sapiens GN=RPF2 PE=1 SV=2	0.789	-0.341903	-2.21576	0.8	-0.321928	-2.06217	-2.13896	1.64117	+
Q9UGM6	Tryptophan--tRNA ligase, mitochondrial OS=Homo sapiens GN=WARS2 PE=1 SV=1	0.796	-0.32916	-2.12913	0.789	-0.341903	-2.19616	-2.16264	2.00595	+
Q99943	1-acyl-sn-glycerol-3-phosphate acyltransferase alpha OS=Homo sapiens GN=AGPAT1 PE=1 SV=2	0.788	-0.343732	-2.2282	0.787	-0.345564	-2.22072	-2.22446	2.97034	+
P17676	CCAAT/enhancer-binding protein beta OS=Homo sapiens GN=CEBPB PE=1 SV=2	0.803	-0.316528	-2.04327	0.775	-0.367732	-2.36941	-2.20634	1.3282	+
Q9BRA2	Thioredoxin domain-containing protein 17 OS=Homo sapiens GN=TXNDC17 PE=1 SV=1	0.784	-0.351074	-2.27811	0.77	-0.37707	-2.43205	-2.35508	1.68196	+
P68366	Tubulin alpha-4A chain OS=Homo sapiens GN=TUBA4A PE=1 SV=1	0.739	-0.436354	-2.85783	0.728	-0.45799	-2.97484	-2.91634	1.89383	+
Q9NQC3	Reticulon-4 OS=Homo sapiens GN=RTN4 PE=1 SV=2	0.714	-0.486004	-3.19535	0.722	-0.469929	-3.05493	-3.12514	1.84465	+
P47914	60S ribosomal protein L29 OS=Homo sapiens GN=RPL29 PE=1 SV=2	0.724	-0.465938	-3.05895	0.719	-0.475936	-3.09523	-3.07709	2.42568	+
P07437	Tubulin beta chain OS=Homo sapiens GN=TUBB PE=1 SV=2	0.699	-0.516636	-3.40359	0.714	-0.486004	-3.16276	-3.28317	1.63193	+
Q9BQE3	Tubulin alpha-1C chain OS=Homo sapiens GN=TUBA1C PE=1 SV=1	0.741	-0.432455	-2.83133	0.712	-0.490051	-3.1899	-3.01061	1.42174	+
O95197	Reticulon-3 OS=Homo sapiens GN=RTN3 PE=1 SV=2	0.723	-0.467932	-3.0725	0.708	-0.498179	-3.24442	-3.15846	1.76141	+
P55039	Developmentally-regulated GTP-binding protein 2 OS=Homo sapiens GN=DRG2 PE=1 SV=1	0.698	-0.518701	-3.41763	0.704	-0.506353	-3.29925	-3.35844	1.95007	+
Q9BV73	Centrosome-associated protein CEP250 OS=Homo sapiens GN=CEP250 PE=1 SV=2	0.596	-0.746616	-4.96698	0.625	-0.678072	-4.45111	-4.70905	1.45798	+
Q9Y6M7	Sodium bicarbonate cotransporter 3 OS=Homo sapiens GN=SLC4A7 PE=1 SV=2	1.114	0.155749	1.16725	1.853	0.889863	6.06628	3.61677	0.421381
Q6PL18	ATPase family AAA domain-containing protein 2 OS=Homo sapiens GN=ATAD2 PE=1 SV=1	0.966	-0.0499049	-0.230772	1.811	0.856787	5.84441	2.80682	0.279738
P05412	Transcription factor AP-1 OS=Homo sapiens GN=JUN PE=1 SV=2	1.05	0.0703893	0.586982	1.749	0.80653	5.5073	3.04714	0.364112
P40189	Interleukin-6 receptor subunit beta OS=Homo sapiens GN=IL6ST PE=1 SV=2	1.245	0.316146	2.25762	1.726	0.787432	5.3792	3.81841	0.607255
P22670	MHC class II regulatory factor RFX1 OS=Homo sapiens GN=RFX1 PE=1 SV=2	1.361	0.444667	3.1313	1.632	0.706641	4.83727	3.98428	0.872038
Q9NNX1	Tuftelin OS=Homo sapiens GN=TUFT1 PE=1 SV=1	1.421	0.506907	3.55441	1.617	0.69332	4.74791	4.15116	1.04146
Q96GT9	X antigen family member 2 OS=Homo sapiens GN=XAGE2 PE=1 SV=1	1.07	0.0976108	0.772033	1.575	0.655352	4.49323	2.63263	0.407077
Q86U90	YrdC domain-containing protein, mitochondrial OS=Homo sapiens GN=YRDC PE=1 SV=1	1.427	0.512985	3.59573	1.55	0.632268	4.33839	3.96706	1.22609
Q92506	Estradiol 17-beta-dehydrogenase 8 OS=Homo sapiens GN=HSD17B8 PE=1 SV=2	1.138	0.186501	1.3763	1.55	0.632268	4.33839	2.85734	0.516508
Q96HC4	PDZ and LIM domain protein 5 OS=Homo sapiens GN=PDLIM5 PE=1 SV=5	1.377	0.461529	3.24593	1.493	0.578214	3.9758	3.61087	1.19298
O94880	PHD finger protein 14 OS=Homo sapiens GN=PHF14 PE=1 SV=2	1.13	0.176323	1.30711	1.489	0.574344	3.94984	2.62848	0.527907
Q9Y2D5	A-kinase anchor protein 2 OS=Homo sapiens GN=AKAP2 PE=1 SV=3	1.324	0.404903	2.86099	1.47	0.555816	3.82556	3.34328	1.03997
P02649	Apolipoprotein E OS=Homo sapiens GN=APOE PE=1 SV=1	1.354	0.437228	3.08073	1.458	0.543991	3.74624	3.41349	1.20857
O00418	Eukaryotic elongation factor 2 kinase OS=Homo sapiens GN=EEF2K PE=1 SV=2	1.559	0.640621	4.46339	1.455	0.541019	3.72631	4.09485	1.24304
Q96PY5	Formin-like protein 2 OS=Homo sapiens GN=FMNL2 PE=1 SV=3	1.087	0.120352	0.926626	1.447	0.533065	3.67295	2.29979	0.465119
Q9NQ92	Coordinator of PRMT5 and differentiation stimulator OS=Homo sapiens GN=COPRS PE=1 SV=3	1.042	0.0593553	0.511974	1.446	0.532068	3.66626	2.08912	0.38545
O95633	Follistatin-related protein 3 OS=Homo sapiens GN=FSTL3 PE=1 SV=1	1.808	0.854395	5.91661	1.436	0.522056	3.5991	4.75786	0.817914
P42575	Caspase-2 OS=Homo sapiens GN=CASP2 PE=1 SV=2	1.285	0.361768	2.56776	1.426	0.511974	3.53148	3.04962	1.00102
P31483	Nucleolysin TIA-1 isoform p40 OS=Homo sapiens GN=TIA1 PE=1 SV=3	1.02	0.0285692	0.30269	1.426	0.511974	3.53148	1.91708	0.351087
O43929	Origin recognition complex subunit 4 OS=Homo sapiens GN=ORC4 PE=1 SV=2	1.105	0.144046	1.0877	1.406	0.491597	3.39479	2.24125	0.519124
Q86WR7	Proline and serine-rich protein 2 OS=Homo sapiens GN=PROSER2 PE=1 SV=2	1.288	0.365133	2.59063	1.403	0.488515	3.37412	2.98238	1.08016
Q96EY1	DnaJ homolog subfamily A member 3, mitochondrial OS=Homo sapiens GN=DNAJA3 PE=1 SV=2	1.015	0.0214797	0.254497	1.398	0.483364	3.33957	1.79703	0.345266
Q5VW38	Protein GPR107 OS=Homo sapiens GN=GPR107 PE=1 SV=1	1.062	0.0867838	0.698431	1.388	0.473008	3.2701	1.98427	0.436468
Q0ZGT2	Nexilin OS=Homo sapiens GN=NEXN PE=1 SV=1	1.266	0.340277	2.42167	1.382	0.466758	3.22818	2.82492	1.04447
P06241	Tyrosine-protein kinase Fyn OS=Homo sapiens GN=FYN PE=1 SV=3	1.128	0.173767	1.28974	1.382	0.466758	3.22818	2.25896	0.588342
Q9BZJ0	Crooked neck-like protein 1 OS=Homo sapiens GN=CRNKL1 PE=1 SV=4	1.212	0.27739	1.99416	1.372	0.45628	3.1579	2.57603	0.849474
Q9BXJ8	Transmembrane protein 120A OS=Homo sapiens GN=TMEM120A PE=1 SV=1	0.963	-0.0543923	-0.261278	1.355	0.438293	3.03724	1.38798	0.255996
Q8NB16	Mixed lineage kinase domain-like protein OS=Homo sapiens GN=MLKL PE=1 SV=1	1.105	0.144046	1.0877	1.348	0.43082	2.98712	2.03741	0.556443
Q53LP3	Ankyrin repeat domain-containing protein SOWAHC OS=Homo sapiens GN=SOWAHC PE=1 SV=1	1.063	0.0881416	0.707661	1.346	0.428678	2.97275	1.8402	0.454418
Q9UEU0	Vesicle transport through interaction with t-SNAREs homolog 1B OS=Homo sapiens GN=VTI1B PE=1 SV=3	0.913	-0.131313	-0.784183	1.342	0.424385	2.94395	1.07988	0.176703
Q13164	Mitogen-activated protein kinase 7 OS=Homo sapiens GN=MAPK7 PE=1 SV=2	1.254	0.326537	2.32826	1.339	0.421156	2.92229	2.62528	1.14436
Q86SQ0	Pleckstrin homology-like domain family B member 2 OS=Homo sapiens GN=PHLDB2 PE=1 SV=2	1.099	0.136191	1.0343	1.337	0.418999	2.90782	1.97106	0.549071
P81605	Dermcidin OS=Homo sapiens GN=DCD PE=1 SV=2	1.265	0.339137	2.41392	1.331	0.412511	2.8643	2.63911	1.26608
Q5VV42	Threonylcarbamoyladenosine tRNA methylthiotransferase OS=Homo sapiens GN=CDKAL1 PE=1 SV=1	1.005	0.0071955	0.157393	1.331	0.412511	2.8643	1.51085	0.332498
P31949	Protein S100-A11 OS=Homo sapiens GN=S100A11 PE=1 SV=2	0.919	-0.121863	-0.719942	1.33	0.411426	2.85702	1.06854	0.182335
P42771	Cyclin-dependent kinase inhibitor 2A OS=Homo sapiens GN=CDKN2A PE=1 SV=2	1.059	0.0827026	0.670687	1.321	0.40163	2.79132	1.731	0.45608
O94842	TOX high mobility group box family member 4 OS=Homo sapiens GN=TOX4 PE=1 SV=1	1.072	0.100305	0.790347	1.319	0.399445	2.77665	1.7835	0.490178
Q96BP3	Peptidylprolyl isomerase domain and WD repeat-containing protein 1 OS=Homo sapiens GN=PPWD1 PE=1 SV=1	1.034	0.0482362	0.436386	1.312	0.391768	2.72516	1.58077	0.39912
O94916	Nuclear factor of activated T-cells 5 OS=Homo sapiens GN=NFAT5 PE=1 SV=1	1.118	0.16092	1.20241	1.308	0.387363	2.69561	1.94901	0.632847
P29353	SHC-transforming protein 1 OS=Homo sapiens GN=SHC1 PE=1 SV=4	1.141	0.190299	1.40212	1.307	0.386259	2.68821	2.04517	0.712341
O75815	Breast cancer anti-estrogen resistance protein 3 OS=Homo sapiens GN=BCAR3 PE=1 SV=1	1.432	0.518031	3.63003	1.306	0.385155	2.6808	3.15542	1.02208
Q9P2T1	GMP reductase 2 OS=Homo sapiens GN=GMPR2 PE=1 SV=1	1.15	0.201634	1.47918	1.302	0.380729	2.65112	2.06515	0.754462
P25815	Protein S100-P OS=Homo sapiens GN=S100P PE=1 SV=2	1.225	0.292782	2.0988	1.297	0.375178	2.61388	2.35634	1.15923
Q6NUK1	Calcium-binding mitochondrial carrier protein SCaMC-1 OS=Homo sapiens GN=SLC25A24 PE=1 SV=2	1.147	0.197865	1.45356	1.294	0.371838	2.59147	2.02252	0.758014
O95067	G2/mitotic-specific cyclin-B2 OS=Homo sapiens GN=CCNB2 PE=1 SV=1	1.184	0.243669	1.76493	1.293	0.370722	2.58399	2.17446	0.926243
O43493	Trans-Golgi network integral membrane protein 2 OS=Homo sapiens GN=TGOLN2 PE=1 SV=2	1.093	0.128293	0.980612	1.291	0.368489	2.56901	1.77481	0.572086
Q96CW5	Gamma-tubulin complex component 3 OS=Homo sapiens GN=TUBGCP3 PE=1 SV=2	1.066	0.0922074	0.7353	1.291	0.368489	2.56901	1.65216	0.491428
Q9NP81	Serine--tRNA ligase, mitochondrial OS=Homo sapiens GN=SARS2 PE=1 SV=1	1.02	0.0285692	0.30269	1.29	0.367371	2.56151	1.4321	0.37149
Q9H2P0	Activity-dependent neuroprotector homeobox protein OS=Homo sapiens GN=ADNP PE=1 SV=1	0.941	-0.0877334	-0.487929	1.287	0.364012	2.53898	1.02553	0.207
Q5JTD0	Tight junction-associated protein 1 OS=Homo sapiens GN=TJAP1 PE=1 SV=1	1.143	0.192825	1.4193	1.283	0.359521	2.50886	1.96408	0.76384
Q8NC42	E3 ubiquitin-protein ligase RNF149 OS=Homo sapiens GN=RNF149 PE=2 SV=2	1.367	0.451013	3.17445	1.282	0.358396	2.50131	2.83788	1.12406
P01891	HLA class I histocompatibility antigen, A-68 alpha chain OS=Homo sapiens GN=HLA-A PE=1 SV=4	1.064	0.0894982	0.716883	1.282	0.358396	2.50131	1.6091	0.491732
Q14738	Serine/threonine-protein phosphatase 2A 56 kDa regulatory subunit delta isoform OS=Homo sapiens GN=PPP2R5D PE=1 SV=1	1.076	0.105678	0.826873	1.281	0.35727	2.49376	1.66032	0.528453
Q07617	Sperm-associated antigen 1 OS=Homo sapiens GN=SPAG1 PE=1 SV=3	1.202	0.265437	1.91291	1.279	0.355016	2.47864	2.19577	1.08851
O95685	Protein phosphatase 1 regulatory subunit 3D OS=Homo sapiens GN=PPP1R3D PE=1 SV=1	1.041	0.0579701	0.502557	1.273	0.348232	2.43313	1.46784	0.431409
Q9UBP0	Spastin OS=Homo sapiens GN=SPAST PE=1 SV=1	1.483	0.568519	3.97324	1.267	0.341417	2.38741	3.18033	0.80813
Q8N122	Regulatory-associated protein of mTOR OS=Homo sapiens GN=RPTOR PE=1 SV=1	1.056	0.0786098	0.642865	1.267	0.341417	2.38741	1.51514	0.478146
Q9BY42	Protein RTF2 homolog OS=Homo sapiens GN=RTFDC1 PE=1 SV=3	1.346	0.428678	3.02261	1.265	0.339137	2.37213	2.69737	1.11694
P12429	Annexin A3 OS=Homo sapiens GN=ANXA3 PE=1 SV=3	1.197	0.259423	1.87203	1.262	0.335712	2.34915	2.11059	1.14476
P62745	Rho-related GTP-binding protein RhoB OS=Homo sapiens GN=RHOB PE=1 SV=1	1.197	0.259423	1.87203	1.261	0.334568	2.34148	2.10675	1.15096
P08574	Cytochrome c1, heme protein, mitochondrial OS=Homo sapiens GN=CYC1 PE=1 SV=3	1.006	0.00863031	0.167147	1.258	0.331132	2.31843	1.24279	0.34277
Q9HC07	Transmembrane protein 165 OS=Homo sapiens GN=TMEM165 PE=1 SV=1	1.106	0.145351	1.09657	1.254	0.326537	2.28761	1.69209	0.666684
Q86VI3	Ras GTPase-activating-like protein IQGAP3 OS=Homo sapiens GN=IQGAP3 PE=1 SV=2	1.365	0.448901	3.16009	1.252	0.324235	2.27216	2.71612	0.986546
Q13501	Sequestosome-1 OS=Homo sapiens GN=SQSTM1 PE=1 SV=1	1.141	0.190299	1.40212	1.251	0.323082	2.26443	1.83327	0.832537
Q9NSV4	Protein diaphanous homolog 3 OS=Homo sapiens GN=DIAPH3 PE=1 SV=4	1.192	0.253384	1.83097	1.248	0.319618	2.24119	2.03608	1.19439
Q9H3Q1	Cdc42 effector protein 4 OS=Homo sapiens GN=CDC42EP4 PE=1 SV=1	0.856	-0.224317	-1.41642	1.248	0.319618	2.24119	0.412387	0.0661044
Q9UHY1	Nuclear receptor-binding protein OS=Homo sapiens GN=NRBP1 PE=1 SV=1	0.98	-0.0291463	-0.0896567	1.247	0.318461	2.23344	1.07189	0.279392
Q9NSC5	Homer protein homolog 3 OS=Homo sapiens GN=HOMER3 PE=1 SV=2	0.991	-0.013043	0.0198126	1.245	0.316146	2.2179	1.11886	0.305998
P35270	Sepiapterin reductase OS=Homo sapiens GN=SPR PE=1 SV=1	1.075	0.104337	0.817755	1.244	0.314986	2.21013	1.51394	0.561628
Q9NX74	tRNA-dihydrouridine(20) synthase [NAD(P)+]-like OS=Homo sapiens GN=DUS2 PE=1 SV=1	1.093	0.128293	0.980612	1.243	0.313826	2.20234	1.59148	0.632052
P41208	Centrin-2 OS=Homo sapiens GN=CETN2 PE=1 SV=1	1.394	0.479231	3.36627	1.241	0.311503	2.18676	2.77651	0.875357
Q9Y6G9	Cytoplasmic dynein 1 light intermediate chain 1 OS=Homo sapiens GN=DYNC1LI1 PE=1 SV=3	1.121	0.164786	1.22869	1.239	0.309176	2.17115	1.69992	0.764085
Q15388	Mitochondrial import receptor subunit TOM20 homolog OS=Homo sapiens GN=TOMM20 PE=1 SV=1	1.022	0.0313952	0.321901	1.238	0.308011	2.16334	1.24262	0.391515
Q9UBW8	COP9 signalosome complex subunit 7a OS=Homo sapiens GN=COPS7A PE=1 SV=1	1.099	0.136191	1.0343	1.237	0.306846	2.15552	1.59491	0.667191
P17301	Integrin alpha-2 OS=Homo sapiens GN=ITGA2 PE=1 SV=1	1.345	0.427606	3.01533	1.236	0.305679	2.14769	2.58151	0.974725
Q96E52	Metalloendopeptidase OMA1, mitochondrial OS=Homo sapiens GN=OMA1 PE=1 SV=1	1.101	0.138814	1.05213	1.235	0.304511	2.13986	1.596	0.679682
Q96SY0	von Willebrand factor A domain-containing protein 9 OS=Homo sapiens GN=VWA9 PE=1 SV=2	1.07	0.0976108	0.772033	1.232	0.301002	2.11632	1.44418	0.557032
P37268	Squalene synthase OS=Homo sapiens GN=FDFT1 PE=1 SV=1	1.106	0.145351	1.09657	1.231	0.299831	2.10846	1.60252	0.71066
Q96DV4	39S ribosomal protein L38, mitochondrial OS=Homo sapiens GN=MRPL38 PE=1 SV=2	1.102	0.140124	1.06104	1.231	0.299831	2.10846	1.58475	0.692095
O14681	Etoposide-induced protein 2.4 homolog OS=Homo sapiens GN=EI24 PE=1 SV=4	0.845	-0.242977	-1.54327	1.23	0.298658	2.1006	0.278667	0.044131
Q7Z2E3	Aprataxin OS=Homo sapiens GN=APTX PE=1 SV=2	1.163	0.217851	1.58942	1.229	0.297485	2.09273	1.84107	1.06307
O43159	Ribosomal RNA-processing protein 8 OS=Homo sapiens GN=RRP8 PE=1 SV=2	1.033	0.0468403	0.426896	1.228	0.296311	2.08485	1.25587	0.430132
O76080	AN1-type zinc finger protein 5 OS=Homo sapiens GN=ZFAND5 PE=1 SV=1	1.342	0.424385	2.99343	1.225	0.292782	2.06118	2.5273	0.935131
Q14181	DNA polymerase alpha subunit B OS=Homo sapiens GN=POLA2 PE=1 SV=2	1.128	0.173767	1.28974	1.218	0.284514	2.00572	1.64773	0.86583
O00217	NADH dehydrogenase [ubiquinone] iron-sulfur protein 8, mitochondrial OS=Homo sapiens GN=NDUFS8 PE=1 SV=1	1.038	0.0538064	0.474252	1.218	0.284514	2.00572	1.23999	0.453227
Q53EP0	Fibronectin type III domain-containing protein 3B OS=Homo sapiens GN=FNDC3B PE=1 SV=2	1.147	0.197865	1.45356	1.214	0.279768	1.97389	1.71372	1.01811
O75419	Cell division control protein 45 homolog OS=Homo sapiens GN=CDC45 PE=1 SV=1	1.102	0.140124	1.06104	1.214	0.279768	1.97389	1.51746	0.730477
Q684P5	Rap1 GTPase-activating protein 2 OS=Homo sapiens GN=RAP1GAP2 PE=1 SV=2	1.326	0.407081	2.87579	1.213	0.27858	1.96592	2.42086	0.927171
Q96RT1	Protein LAP2 OS=Homo sapiens GN=ERBB2IP PE=1 SV=2	1.146	0.196607	1.445	1.213	0.27858	1.96592	1.70546	1.01557
Q9NR09	Baculoviral IAP repeat-containing protein 6 OS=Homo sapiens GN=BIRC6 PE=1 SV=2	1.021	0.0299829	0.312301	1.213	0.27858	1.96592	1.13911	0.398259
Q9NWB1	RNA binding protein fox-1 homolog 1 OS=Homo sapiens GN=RBFOX1 PE=1 SV=2	1.004	0.00575927	0.147629	1.213	0.27858	1.96592	1.05677	0.34459
O00411	DNA-directed RNA polymerase, mitochondrial OS=Homo sapiens GN=POLRMT PE=1 SV=2	1.166	0.221568	1.61469	1.212	0.27739	1.95793	1.78631	1.21483
Q96CP6	GRAM domain-containing protein 1A OS=Homo sapiens GN=GRAMD1A PE=1 SV=2	1.041	0.0579701	0.502557	1.212	0.27739	1.95793	1.23025	0.46846
Q9NR12	PDZ and LIM domain protein 7 OS=Homo sapiens GN=PDLIM7 PE=1 SV=1	1.256	0.328836	2.34389	1.211	0.276199	1.94995	2.14692	1.23474
Q9UKJ3	G patch domain-containing protein 8 OS=Homo sapiens GN=GPATCH8 PE=1 SV=2	1.084	0.116365	0.899521	1.211	0.276199	1.94995	1.42473	0.648121
Q9NW68	BSD domain-containing protein 1 OS=Homo sapiens GN=BSDC1 PE=1 SV=1	1.265	0.339137	2.41392	1.21	0.275007	1.94195	2.17794	1.16297
O75528	Transcriptional adapter 3 OS=Homo sapiens GN=TADA3 PE=1 SV=1	1.136	0.183963	1.35905	1.21	0.275007	1.94195	1.6505	0.953624
O43847	Nardilysin OS=Homo sapiens GN=NRDC PE=1 SV=2	1.023	0.0328061	0.331493	1.21	0.275007	1.94195	1.13672	0.406309
P68036	Ubiquitin-conjugating enzyme E2 L3 OS=Homo sapiens GN=UBE2L3 PE=1 SV=1	1.024	0.0342157	0.341076	1.209	0.273814	1.93395	1.13751	0.410199
Q8WUA2	Peptidyl-prolyl cis-trans isomerase-like 4 OS=Homo sapiens GN=PPIL4 PE=1 SV=1	1.164	0.219091	1.59785	1.208	0.27262	1.92594	1.7619	1.22838
Q15334	Lethal(2) giant larvae protein homolog 1 OS=Homo sapiens GN=LLGL1 PE=1 SV=3	1.022	0.0313952	0.321901	1.207	0.271426	1.91793	1.11992	0.404352
P07305	Histone H1.0 OS=Homo sapiens GN=H1F0 PE=1 SV=3	1.079	0.109695	0.854179	1.206	0.27023	1.90991	1.38204	0.634011
Q9Y4D1	Disheveled-associated activator of morphogenesis 1 OS=Homo sapiens GN=DAAM1 PE=1 SV=2	1.089	0.123004	0.944654	1.204	0.267835	1.89385	1.41925	0.687308
Q53GS7	Nucleoporin GLE1 OS=Homo sapiens GN=GLE1 PE=1 SV=2	0.957	-0.0634092	-0.322574	1.204	0.267835	1.89385	0.785636	0.216523
Q9HC36	rRNA methyltransferase 3, mitochondrial OS=Homo sapiens GN=RNMTL1 PE=1 SV=2	1.288	0.365133	2.59063	1.2	0.263034	1.86164	2.22614	0.985817
Q6P1N0	Coiled-coil and C2 domain-containing protein 1A OS=Homo sapiens GN=CC2D1A PE=1 SV=1	1.017	0.0243197	0.273802	1.2	0.263034	1.86164	1.06772	0.390368
P14635	G2/mitotic-specific cyclin-B1 OS=Homo sapiens GN=CCNB1 PE=1 SV=1	1.248	0.319618	2.28123	1.198	0.260628	1.8455	2.06336	1.17412
Q8N573	Oxidation resistance protein 1 OS=Homo sapiens GN=OXR1 PE=1 SV=2	0.927	-0.109359	-0.634937	1.198	0.260628	1.8455	0.605281	0.14816
Q9H2H9	Sodium-coupled neutral amino acid transporter 1 OS=Homo sapiens GN=SLC38A1 PE=1 SV=1	1.282	0.358396	2.54484	1.197	0.259423	1.83742	2.19113	0.99187
O60271	C-Jun-amino-terminal kinase-interacting protein 4 OS=Homo sapiens GN=SPAG9 PE=1 SV=4	1.158	0.211635	1.54717	1.197	0.259423	1.83742	1.69229	1.26391
Q96S59	Ran-binding protein 9 OS=Homo sapiens GN=RANBP9 PE=1 SV=1	1.065	0.0908534	0.726097	1.197	0.259423	1.83742	1.28176	0.584332
Q9Y448	Small kinetochore-associated protein OS=Homo sapiens GN=KNSTRN PE=1 SV=2	1.059	0.0827026	0.670687	1.195	0.257011	1.82124	1.24596	0.560083
Q08380	Galectin-3-binding protein OS=Homo sapiens GN=LGALS3BP PE=1 SV=1	1.048	0.0676387	0.568283	1.195	0.257011	1.82124	1.19476	0.512227
Q86TI2	Dipeptidyl peptidase 9 OS=Homo sapiens GN=DPP9 PE=1 SV=3	1.03	0.0426443	0.398373	1.194	0.255803	1.81313	1.10575	0.440916
Q8IY17	Neuropathy target esterase OS=Homo sapiens GN=PNPLA6 PE=1 SV=2	1.067	0.0935602	0.744497	1.193	0.254594	1.80503	1.27476	0.600405
P07355	Annexin A2 OS=Homo sapiens GN=ANXA2 PE=1 SV=2	1.153	0.205393	1.50473	1.192	0.253384	1.79691	1.65082	1.25032
Q9BVI4	Nucleolar complex protein 4 homolog OS=Homo sapiens GN=NOC4L PE=1 SV=1	1.012	0.0172093	0.225466	1.192	0.253384	1.79691	1.01119	0.376197
Q8IWZ8	SURP and G-patch domain-containing protein 1 OS=Homo sapiens GN=SUGP1 PE=1 SV=2	1.083	0.115033	0.890469	1.191	0.252173	1.78879	1.33963	0.686235
Q9NVH1	DnaJ homolog subfamily C member 11 OS=Homo sapiens GN=DNAJC11 PE=1 SV=2	0.94	-0.0892673	-0.498357	1.191	0.252173	1.78879	0.645216	0.172
Q5SWX8	Protein odr-4 homolog OS=Homo sapiens GN=ODR4 PE=1 SV=1	1.276	0.351628	2.49883	1.189	0.249749	1.77252	2.13568	0.969699
Q9BRT9	DNA replication complex GINS protein SLD5 OS=Homo sapiens GN=GINS4 PE=1 SV=1	0.948	-0.077041	-0.415243	1.189	0.249749	1.77252	0.678641	0.189434
Q6UVJ0	Spindle assembly abnormal protein 6 homolog OS=Homo sapiens GN=SASS6 PE=1 SV=1	1.264	0.337996	2.40616	1.187	0.24732	1.75623	2.0812	1.00609
P21912	Succinate dehydrogenase [ubiquinone] iron-sulfur subunit, mitochondrial OS=Homo sapiens GN=SDHB PE=1 SV=3	1.145	0.195348	1.43644	1.187	0.24732	1.75623	1.59634	1.19686
P08758	Annexin A5 OS=Homo sapiens GN=ANXA5 PE=1 SV=2	1.102	0.140124	1.06104	1.187	0.24732	1.75623	1.40863	0.812432
Q9UIC8	Leucine carboxyl methyltransferase 1 OS=Homo sapiens GN=LCMT1 PE=1 SV=2	1.014	0.0200577	0.24483	1.187	0.24732	1.75623	1.00053	0.385293
Q12805	EGF-containing fibulin-like extracellular matrix protein 1 OS=Homo sapiens GN=EFEMP1 PE=1 SV=2	0.979	-0.0306192	-0.0996698	1.187	0.24732	1.75623	0.828281	0.270762
O15347	High mobility group protein B3 OS=Homo sapiens GN=HMGB3 PE=1 SV=4	1.071	0.0989585	0.781194	1.185	0.244887	1.73991	1.26055	0.635748
Q9NS91	E3 ubiquitin-protein ligase RAD18 OS=Homo sapiens GN=RAD18 PE=1 SV=2	0.869	-0.202572	-1.2686	1.185	0.244887	1.73991	0.235659	0.0452413
Q99986	Serine/threonine-protein kinase VRK1 OS=Homo sapiens GN=VRK1 PE=1 SV=1	1.085	0.117695	0.908564	1.184	0.243669	1.73174	1.32015	0.715792
Q9NSY1	BMP-2-inducible protein kinase OS=Homo sapiens GN=BMP2K PE=1 SV=2	1.014	0.0200577	0.24483	1.184	0.243669	1.73174	0.988287	0.386593
Q96SU4	Oxysterol-binding protein-related protein 9 OS=Homo sapiens GN=OSBPL9 PE=1 SV=2	1.106	0.145351	1.09657	1.183	0.24245	1.72357	1.41007	0.856132
O15160	DNA-directed RNA polymerases I and III subunit RPAC1 OS=Homo sapiens GN=POLR1C PE=1 SV=1	1.103	0.141433	1.06993	1.183	0.24245	1.72357	1.39675	0.834678
P35637	RNA-binding protein FUS OS=Homo sapiens GN=FUS PE=1 SV=1	1.024	0.0342157	0.341076	1.183	0.24245	1.72357	1.03232	0.425244
Q9NX04	Uncharacterized protein C1orf109 OS=Homo sapiens GN=C1orf109 PE=1 SV=1	0.997	-0.00433459	0.0790121	1.183	0.24245	1.72357	0.901289	0.32713
Q9ULW0	Targeting protein for Xklp2 OS=Homo sapiens GN=TPX2 PE=1 SV=2	1.22	0.286881	2.05868	1.181	0.240009	1.70719	1.88294	1.22733
P46734	Dual specificity mitogen-activated protein kinase kinase 3 OS=Homo sapiens GN=MAP2K3 PE=1 SV=2	0.938	-0.0923402	-0.519245	1.18	0.238787	1.69899	0.589874	0.161892
Q9ULJ3	Zinc finger and BTB domain-containing protein 21 OS=Homo sapiens GN=ZBTB21 PE=1 SV=2	1.053	0.0745054	0.614963	1.179	0.237564	1.69079	1.15288	0.556077
Q9UJ41	Rab5 GDP/GTP exchange factor OS=Homo sapiens GN=RABGEF1 PE=1 SV=2	1.052	0.0731347	0.605645	1.179	0.237564	1.69079	1.14822	0.551253
Q07955	Serine/arginine-rich splicing factor 1 OS=Homo sapiens GN=SRSF1 PE=1 SV=2	1.254	0.326537	2.32826	1.178	0.23634	1.68258	2.00542	0.993044
P32754	4-hydroxyphenylpyruvate dioxygenase OS=Homo sapiens GN=HPD PE=1 SV=2	1.144	0.194087	1.42787	1.178	0.23634	1.68258	1.55523	1.28388
Q9BYT8	Neurolysin, mitochondrial OS=Homo sapiens GN=NLN PE=1 SV=1	1.002	0.00288251	0.128074	1.178	0.23634	1.68258	0.905326	0.345212
P60709	Actin, cytoplasmic 1 OS=Homo sapiens GN=ACTB PE=1 SV=1	1.21	0.275007	1.97796	1.175	0.232661	1.6579	1.81793	1.25261
Q8WVM8	Sec1 family domain-containing protein 1 OS=Homo sapiens GN=SCFD1 PE=1 SV=4	1.101	0.138814	1.05213	1.175	0.232661	1.6579	1.35502	0.853869
Q9NUJ3	T-complex protein 11-like protein 1 OS=Homo sapiens GN=TCP11L1 PE=1 SV=1	1.096	0.132248	1.00749	1.175	0.232661	1.6579	1.3327	0.817101
O00291	Huntingtin-interacting protein 1 OS=Homo sapiens GN=HIP1 PE=1 SV=5	1.063	0.0881416	0.707661	1.174	0.231432	1.64966	1.17866	0.616145
Q5TC82	Roquin-1 OS=Homo sapiens GN=RC3H1 PE=1 SV=1	0.968	-0.046921	-0.210489	1.174	0.231432	1.64966	0.719587	0.235979
Q9NVS2	28S ribosomal protein S18a, mitochondrial OS=Homo sapiens GN=MRPS18A PE=1 SV=1	1.126	0.171207	1.27234	1.173	0.230203	1.64142	1.45688	1.09576
P62913	60S ribosomal protein L11 OS=Homo sapiens GN=RPL11 PE=1 SV=2	1.131	0.177599	1.31579	1.172	0.228973	1.63316	1.47448	1.16588
P29083	General transcription factor IIE subunit 1 OS=Homo sapiens GN=GTF2E1 PE=1 SV=2	1.01	0.0143553	0.206065	1.17	0.226509	1.61663	0.911349	0.377487
Q92747	Actin-related protein 2/3 complex subunit 1A OS=Homo sapiens GN=ARPC1A PE=1 SV=2	1.07	0.0976108	0.772033	1.169	0.225275	1.60836	1.1902	0.667373
P80723	Brain acid soluble protein 1 OS=Homo sapiens GN=BASP1 PE=1 SV=2	1.266	0.340277	2.42167	1.168	0.22404	1.60008	2.01087	0.891813
P02768	Serum albumin OS=Homo sapiens GN=ALB PE=1 SV=2	1.086	0.119024	0.917599	1.167	0.222805	1.59179	1.25469	0.777042
Q03188	Centromere protein C OS=Homo sapiens GN=CENPC PE=1 SV=2	0.998	-0.00288828	0.0888445	1.167	0.222805	1.59179	0.840317	0.33301
Q676U5	Autophagy-related protein 16-1 OS=Homo sapiens GN=ATG16L1 PE=1 SV=2	0.957	-0.0634092	-0.322574	1.166	0.221568	1.58349	0.630459	0.202085
Q96BI3	Gamma-secretase subunit APH-1A OS=Homo sapiens GN=APH1A PE=1 SV=1	1.115	0.157044	1.17605	1.165	0.22033	1.57519	1.37562	1.03755
P23497	Nuclear autoantigen Sp-100 OS=Homo sapiens GN=SP100 PE=1 SV=3	1.031	0.0440443	0.40789	1.165	0.22033	1.57519	0.991539	0.470195
Q14118	Dystroglycan OS=Homo sapiens GN=DAG1 PE=1 SV=2	1.275	0.350497	2.49114	1.164	0.219091	1.56688	2.02901	0.845985
O43583	Density-regulated protein OS=Homo sapiens GN=DENR PE=1 SV=2	1.36	0.443607	3.1241	1.163	0.217851	1.55856	2.34133	0.687396
Q8TF42	Ubiquitin-associated and SH3 domain-containing protein B OS=Homo sapiens GN=UBASH3B PE=1 SV=2	1.071	0.0989585	0.781194	1.163	0.217851	1.55856	1.16988	0.689927
Q15758	Neutral amino acid transporter B(0) OS=Homo sapiens GN=SLC1A5 PE=1 SV=2	1.232	0.301002	2.15468	1.162	0.21661	1.55024	1.85246	0.987353
Q9H5N1	Rab GTPase-binding effector protein 2 OS=Homo sapiens GN=RABEP2 PE=1 SV=2	1.085	0.117695	0.908564	1.162	0.21661	1.55024	1.2294	0.78911
Q9P2B4	CTTNBP2 N-terminal-like protein OS=Homo sapiens GN=CTTNBP2NL PE=1 SV=2	1.262	0.335712	2.39063	1.161	0.215368	1.54191	1.96627	0.868635
Q7Z2W9	39S ribosomal protein L21, mitochondrial OS=Homo sapiens GN=MRPL21 PE=1 SV=2	1.088	0.121679	0.935644	1.161	0.215368	1.54191	1.23877	0.815934
Q03426	Mevalonate kinase OS=Homo sapiens GN=MVK PE=1 SV=1	1.024	0.0342157	0.341076	1.161	0.215368	1.54191	0.941491	0.442001
Q96DT7	Zinc finger and BTB domain-containing protein 10 OS=Homo sapiens GN=ZBTB10 PE=1 SV=2	1.019	0.0271541	0.293071	1.161	0.215368	1.54191	0.917488	0.419733
Q99618	Cell division cycle-associated protein 3 OS=Homo sapiens GN=CDCA3 PE=1 SV=1	1.194	0.255803	1.84741	1.16	0.214125	1.53357	1.69049	1.22969
Q69YH5	Cell division cycle-associated protein 2 OS=Homo sapiens GN=CDCA2 PE=1 SV=2	1.083	0.115033	0.890469	1.159	0.212881	1.52522	1.20784	0.786265
O75390	Citrate synthase, mitochondrial OS=Homo sapiens GN=CS PE=1 SV=2	1.041	0.0579701	0.502557	1.159	0.212881	1.52522	1.01389	0.526707
P56556	NADH dehydrogenase [ubiquinone] 1 alpha subcomplex subunit 6 OS=Homo sapiens GN=NDUFA6 PE=1 SV=3	0.999	-0.00144342	0.0986665	1.159	0.212881	1.52522	0.811943	0.338306
P60660	Myosin light polypeptide 6 OS=Homo sapiens GN=MYL6 PE=1 SV=2	1.203	0.266637	1.92106	1.158	0.211635	1.51687	1.71896	1.12781
Q14764	Major vault protein OS=Homo sapiens GN=MVP PE=1 SV=4	1.104	0.14274	1.07882	1.158	0.211635	1.51687	1.29784	0.972924
Q15650	Activating signal cointegrator 1 OS=Homo sapiens GN=TRIP4 PE=1 SV=4	1.01	0.0143553	0.206065	1.158	0.211635	1.51687	0.861466	0.382956
P48509	CD151 antigen OS=Homo sapiens GN=CD151 PE=1 SV=3	1.12	0.163499	1.21994	1.157	0.210389	1.50851	1.36422	1.17339
Q96S97	Myeloid-associated differentiation marker OS=Homo sapiens GN=MYADM PE=1 SV=2	1.212	0.27739	1.99416	1.156	0.209141	1.50014	1.74715	1.0486
Q9UNQ2	Probable dimethyladenosine transferase OS=Homo sapiens GN=DIMT1 PE=1 SV=1	0.832	-0.265345	-1.69532	1.154	0.206643	1.48338	-0.10597	0.0188085
Q8NEM2	SHC SH2 domain-binding protein 1 OS=Homo sapiens GN=SHCBP1 PE=1 SV=3	1.195	0.257011	1.85563	1.153	0.205393	1.47499	1.66531	1.14002
P62857	40S ribosomal protein S28 OS=Homo sapiens GN=RPS28 PE=1 SV=1	1.083	0.115033	0.890469	1.153	0.205393	1.47499	1.18273	0.811848
O14965	Aurora kinase A OS=Homo sapiens GN=AURKA PE=1 SV=2	1.069	0.0962619	0.762862	1.153	0.205393	1.47499	1.11893	0.707446
P26006	Integrin alpha-3 OS=Homo sapiens GN=ITGA3 PE=1 SV=5	1.066	0.0922074	0.7353	1.153	0.205393	1.47499	1.10515	0.686995
Q13685	Angio-associated migratory cell protein OS=Homo sapiens GN=AAMP PE=1 SV=2	0.982	-0.0262051	-0.0696623	1.153	0.205393	1.47499	0.702665	0.275688
Q9NTX5	Ethylmalonyl-CoA decarboxylase OS=Homo sapiens GN=ECHDC1 PE=1 SV=2	1.108	0.147958	1.11429	1.152	0.204141	1.46659	1.29044	1.06365
Q05682	Caldesmon OS=Homo sapiens GN=CALD1 PE=1 SV=3	1.217	0.283329	2.03454	1.151	0.202888	1.45819	1.74636	0.982497
Q14571	Inositol 1,4,5-trisphosphate receptor type 2 OS=Homo sapiens GN=ITPR2 PE=1 SV=2	1.178	0.23634	1.7151	1.151	0.202888	1.45819	1.58665	1.28879
O75683	Surfeit locus protein 6 OS=Homo sapiens GN=SURF6 PE=1 SV=3	1.118	0.16092	1.20241	1.151	0.202888	1.45819	1.3303	1.21456
P23142	Fibulin-1 OS=Homo sapiens GN=FBLN1 PE=1 SV=4	1.109	0.149259	1.12314	1.151	0.202888	1.45819	1.29066	1.08527
Q15942	Zyxin OS=Homo sapiens GN=ZYX PE=1 SV=1	1.045	0.0635029	0.540168	1.151	0.202888	1.45819	0.99918	0.562012
Q06830	Peroxiredoxin-1 OS=Homo sapiens GN=PRDX1 PE=1 SV=1	1.045	0.0635029	0.540168	1.151	0.202888	1.45819	0.99918	0.562012
O94804	Serine/threonine-protein kinase 10 OS=Homo sapiens GN=STK10 PE=1 SV=1	1.459	0.54498	3.81323	1.15	0.201634	1.44978	2.6315	0.570727
Q9UKY7	Protein CDV3 homolog OS=Homo sapiens GN=CDV3 PE=1 SV=1	1.248	0.319618	2.28123	1.15	0.201634	1.44978	1.8655	0.85515
Q9C0I1	Myotubularin-related protein 12 OS=Homo sapiens GN=MTMR12 PE=1 SV=2	1.079	0.109695	0.854179	1.15	0.201634	1.44978	1.15198	0.793045
Q92917	G patch domain and KOW motifs-containing protein OS=Homo sapiens GN=GPKOW PE=1 SV=2	1.117	0.159629	1.19363	1.148	0.199123	1.43293	1.31328	1.23775
O94915	Protein furry homolog-like OS=Homo sapiens GN=FRYL PE=1 SV=2	0.969	-0.0454314	-0.200362	1.148	0.199123	1.43293	0.616286	0.230296
P08581	Hepatocyte growth factor receptor OS=Homo sapiens GN=MET PE=1 SV=4	1.094	0.129613	0.98958	1.147	0.197865	1.4245	1.20704	0.945095
Q53GL7	Poly [ADP-ribose] polymerase 10 OS=Homo sapiens GN=PARP10 PE=1 SV=2	1.052	0.0731347	0.605645	1.147	0.197865	1.4245	1.01507	0.61248
P54709	Sodium/potassium-transporting ATPase subunit beta-3 OS=Homo sapiens GN=ATP1B3 PE=1 SV=1	1.04	0.0565835	0.493131	1.147	0.197865	1.4245	0.958816	0.540854
Q9P2B2	Prostaglandin F2 receptor negative regulator OS=Homo sapiens GN=PTGFRN PE=1 SV=2	0.959	-0.0603973	-0.302099	1.147	0.197865	1.4245	0.561201	0.198569
P16070	CD44 antigen OS=Homo sapiens GN=CD44 PE=1 SV=3	1.183	0.24245	1.75664	1.146	0.196607	1.41606	1.58635	1.16699
P04632	Calpain small subunit 1 OS=Homo sapiens GN=CAPNS1 PE=1 SV=1	1.109	0.149259	1.12314	1.146	0.196607	1.41606	1.2696	1.13598
Q01650	Large neutral amino acids transporter small subunit 1 OS=Homo sapiens GN=SLC7A5 PE=1 SV=2	1.116	0.158337	1.18485	1.145	0.195348	1.40761	1.29623	1.26305
Q96I59	Probable asparagine--tRNA ligase, mitochondrial OS=Homo sapiens GN=NARS2 PE=1 SV=3	1.101	0.138814	1.05213	1.145	0.195348	1.40761	1.22987	1.03919
P42356	Phosphatidylinositol 4-kinase alpha OS=Homo sapiens GN=PI4KA PE=1 SV=4	1.083	0.115033	0.890469	1.145	0.195348	1.40761	1.14904	0.851049
Q16718	NADH dehydrogenase [ubiquinone] 1 alpha subcomplex subunit 5 OS=Homo sapiens GN=NDUFA5 PE=1 SV=3	0.95	-0.0740006	-0.394574	1.145	0.195348	1.40761	0.506519	0.171348
P00558	Phosphoglycerate kinase 1 OS=Homo sapiens GN=PGK1 PE=1 SV=3	1.112	0.153157	1.14963	1.144	0.194087	1.39916	1.27439	1.20672
Q6IN84	rRNA methyltransferase 1, mitochondrial OS=Homo sapiens GN=MRM1 PE=1 SV=1	1.45	0.536053	3.75254	1.142	0.191563	1.38222	2.56738	0.560158
Q96GD4	Aurora kinase B OS=Homo sapiens GN=AURKB PE=1 SV=3	1.089	0.123004	0.944654	1.142	0.191563	1.38222	1.16344	0.926889
Q9H0X4	Protein FAM234A OS=Homo sapiens GN=FAM234A PE=1 SV=1	1.202	0.265437	1.91291	1.141	0.190299	1.37375	1.64333	0.985007
P17568	NADH dehydrogenase [ubiquinone] 1 beta subcomplex subunit 7 OS=Homo sapiens GN=NDUFB7 PE=1 SV=4	1.063	0.0881416	0.707661	1.141	0.190299	1.37375	1.0407	0.705153
Q13443	Disintegrin and metalloproteinase domain-containing protein 9 OS=Homo sapiens GN=ADAM9 PE=1 SV=1	1.095	0.130931	0.998541	1.14	0.189034	1.36526	1.1819	1.00884
Q658Y4	Protein FAM91A1 OS=Homo sapiens GN=FAM91A1 PE=1 SV=3	1.175	0.232661	1.6901	1.139	0.187768	1.35677	1.52343	1.15883
Q9ULF5	Zinc transporter ZIP10 OS=Homo sapiens GN=SLC39A10 PE=1 SV=2	1.173	0.230203	1.67339	1.139	0.187768	1.35677	1.51508	1.17862
P24386	Rab proteins geranylgeranyltransferase component A 1 OS=Homo sapiens GN=CHM PE=1 SV=3	1.268	0.342555	2.43715	1.137	0.185232	1.33976	1.88846	0.744692
Q9BXW9	Fanconi anemia group D2 protein OS=Homo sapiens GN=FANCD2 PE=1 SV=2	1.178	0.23634	1.7151	1.137	0.185232	1.33976	1.52743	1.10885
Q8WWI1	LIM domain only protein 7 OS=Homo sapiens GN=LMO7 PE=1 SV=3	1.102	0.140124	1.06104	1.137	0.185232	1.33976	1.2004	1.13324
P61289	Proteasome activator complex subunit 3 OS=Homo sapiens GN=PSME3 PE=1 SV=1	1.003	0.00432161	0.137857	1.137	0.185232	1.33976	0.738809	0.361787
Q8NCF5	NFATC2-interacting protein OS=Homo sapiens GN=NFATC2IP PE=1 SV=1	1.406	0.491597	3.45033	1.136	0.183963	1.33125	2.39079	0.575812
P40121	Macrophage-capping protein OS=Homo sapiens GN=CAPG PE=1 SV=2	1.022	0.0313952	0.321901	1.136	0.183963	1.33125	0.826574	0.457222
P28702	Retinoic acid receptor RXR-beta OS=Homo sapiens GN=RXRB PE=1 SV=2	0.969	-0.0454314	-0.200362	1.136	0.183963	1.33125	0.565442	0.225408
Q8TD16	Protein bicaudal D homolog 2 OS=Homo sapiens GN=BICD2 PE=1 SV=1	1.218	0.284514	2.04259	1.135	0.182692	1.32272	1.68266	0.872388
Q9UL46	Proteasome activator complex subunit 2 OS=Homo sapiens GN=PSME2 PE=1 SV=4	1.065	0.0908534	0.726097	1.135	0.182692	1.32272	1.02441	0.743768
P15408	Fos-related antigen 2 OS=Homo sapiens GN=FOSL2 PE=1 SV=1	0.962	-0.0558912	-0.271467	1.135	0.182692	1.32272	0.525628	0.201442
Q99567	Nuclear pore complex protein Nup88 OS=Homo sapiens GN=NUP88 PE=1 SV=2	1.103	0.141433	1.06993	1.134	0.181421	1.31419	1.19206	1.18711
Q9BXF6	Rab11 family-interacting protein 5 OS=Homo sapiens GN=RAB11FIP5 PE=1 SV=1	1.04	0.0565835	0.493131	1.134	0.181421	1.31419	0.903662	0.56628
Q15102	Platelet-activating factor acetylhydrolase IB subunit gamma OS=Homo sapiens GN=PAFAH1B3 PE=1 SV=1	0.979	-0.0306192	-0.0996698	1.134	0.181421	1.31419	0.607261	0.261069
Q6W2J9	BCL-6 corepressor OS=Homo sapiens GN=BCOR PE=1 SV=1	0.942	-0.086201	-0.477512	1.134	0.181421	1.31419	0.41834	0.141539
Q8NE86	Calcium uniporter protein, mitochondrial OS=Homo sapiens GN=MCU PE=1 SV=1	1.066	0.0922074	0.7353	1.133	0.180148	1.30566	1.02048	0.760748
Q6ZSZ5	Rho guanine nucleotide exchange factor 18 OS=Homo sapiens GN=ARHGEF18 PE=1 SV=3	0.786	-0.347399	-2.25312	1.133	0.180148	1.30566	-0.473733	0.0786503
P05114	Non-histone chromosomal protein HMG-14 OS=Homo sapiens GN=HMGN1 PE=1 SV=3	1.102	0.140124	1.06104	1.132	0.178874	1.29711	1.17907	1.19709
P04183	Thymidine kinase, cytosolic OS=Homo sapiens GN=TK1 PE=1 SV=2	1.071	0.0989585	0.781194	1.132	0.178874	1.29711	1.03915	0.809941
Q6FI81	Anamorsin OS=Homo sapiens GN=CIAPIN1 PE=1 SV=2	1.061	0.0854247	0.689191	1.132	0.178874	1.29711	0.993151	0.723359
Q15397	Pumilio homolog 3 OS=Homo sapiens GN=PUM3 PE=1 SV=3	1.044	0.0621217	0.530779	1.132	0.178874	1.29711	0.913945	0.597346
P55268	Laminin subunit beta-2 OS=Homo sapiens GN=LAMB2 PE=1 SV=2	1.075	0.104337	0.817755	1.131	0.177599	1.28856	1.05316	0.853884
Q86VQ1	Glucocorticoid-induced transcript 1 protein OS=Homo sapiens GN=GLCCI1 PE=1 SV=1	1.054	0.0758749	0.624273	1.131	0.177599	1.28856	0.956415	0.67205
Q8IV38	Ankyrin repeat and MYND domain-containing protein 2 OS=Homo sapiens GN=ANKMY2 PE=1 SV=1	1.23	0.298658	2.13874	1.13	0.176323	1.28	1.70937	0.805015
Q8NFC6	Biorientation of chromosomes in cell division protein 1-like 1 OS=Homo sapiens GN=BOD1L1 PE=1 SV=2	1.1	0.137504	1.04322	1.13	0.176323	1.28	1.16161	1.18937
Q5QJE6	Deoxynucleotidyltransferase terminal-interacting protein 2 OS=Homo sapiens GN=DNTTIP2 PE=1 SV=2	1.181	0.240009	1.74005	1.129	0.175045	1.27143	1.50574	1.00755
Q99996	A-kinase anchor protein 9 OS=Homo sapiens GN=AKAP9 PE=1 SV=3	1.177	0.235114	1.70678	1.129	0.175045	1.27143	1.4891	1.03431
Q7L8L6	FAST kinase domain-containing protein 5, mitochondrial OS=Homo sapiens GN=FASTKD5 PE=1 SV=1	1.157	0.210389	1.53869	1.129	0.175045	1.27143	1.40506	1.21921
Q92692	Nectin-2 OS=Homo sapiens GN=NECTIN2 PE=1 SV=1	1.102	0.140124	1.06104	1.129	0.175045	1.27143	1.16623	1.24208
Q9NYJ1	Cytochrome c oxidase assembly factor 4 homolog, mitochondrial OS=Homo sapiens GN=COA4 PE=1 SV=2	1.385	0.469886	3.30274	1.128	0.173767	1.26285	2.2828	0.572679
Q02241	Kinesin-like protein KIF23 OS=Homo sapiens GN=KIF23 PE=1 SV=3	1.087	0.120352	0.926626	1.128	0.173767	1.26285	1.09474	1.01321
Q8N4H5	Mitochondrial import receptor subunit TOM5 homolog OS=Homo sapiens GN=TOMM5 PE=1 SV=1	1.002	0.00288251	0.128074	1.128	0.173767	1.26285	0.695464	0.360856
Q9BUL9	Ribonuclease P protein subunit p25 OS=Homo sapiens GN=RPP25 PE=1 SV=1	0.999	-0.00144342	0.0986665	1.128	0.173767	1.26285	0.680761	0.346438
Q9H2M9	Rab3 GTPase-activating protein non-catalytic subunit OS=Homo sapiens GN=RAB3GAP2 PE=1 SV=1	1.017	0.0243197	0.273802	1.127	0.172488	1.25427	0.764037	0.439884
Q9UH65	Switch-associated protein 70 OS=Homo sapiens GN=SWAP70 PE=1 SV=1	1.085	0.117695	0.908564	1.126	0.171207	1.24568	1.07712	1.00514
O95352	Ubiquitin-like modifier-activating enzyme ATG7 OS=Homo sapiens GN=ATG7 PE=1 SV=1	1.079	0.109695	0.854179	1.126	0.171207	1.24568	1.04993	0.930534
Q99873	Protein arginine N-methyltransferase 1 OS=Homo sapiens GN=PRMT1 PE=1 SV=2	1.055	0.077243	0.633572	1.126	0.171207	1.24568	0.939627	0.697972
O60870	DNA/RNA-binding protein KIN17 OS=Homo sapiens GN=KIN PE=1 SV=2	1.013	0.0186342	0.235153	1.126	0.171207	1.24568	0.740417	0.418824
Q05209	Tyrosine-protein phosphatase non-receptor type 12 OS=Homo sapiens GN=PTPN12 PE=1 SV=3	0.999	-0.00144342	0.0986665	1.126	0.171207	1.24568	0.672174	0.347096
Q92665	28S ribosomal protein S31, mitochondrial OS=Homo sapiens GN=MRPS31 PE=1 SV=3	0.964	-0.0528949	-0.251099	1.126	0.171207	1.24568	0.497291	0.202989
Q9GZY8	Mitochondrial fission factor OS=Homo sapiens GN=MFF PE=1 SV=1	1.235	0.304511	2.17853	1.125	0.169925	1.23708	1.70781	0.766444
Q8NHP6	Motile sperm domain-containing protein 2 OS=Homo sapiens GN=MOSPD2 PE=1 SV=1	0.929	-0.106249	-0.6138	1.125	0.169925	1.23708	0.311641	0.100611
Q9BZL1	Ubiquitin-like protein 5 OS=Homo sapiens GN=UBL5 PE=1 SV=1	0.918	-0.123434	-0.73062	1.125	0.169925	1.23708	0.253232	0.0759158
P18074	TFIIH basal transcription factor complex helicase XPD subunit OS=Homo sapiens GN=ERCC2 PE=1 SV=1	1.229	0.297485	2.13077	1.124	0.168642	1.22848	1.67962	0.777146
O43896	Kinesin-like protein KIF1C OS=Homo sapiens GN=KIF1C PE=1 SV=3	1.091	0.125651	0.962649	1.124	0.168642	1.22848	1.09556	1.1143
P06733	Alpha-enolase OS=Homo sapiens GN=ENO1 PE=1 SV=2	1.151	0.202888	1.4877	1.123	0.167358	1.21986	1.35378	1.20224
P43121	Cell surface glycoprotein MUC18 OS=Homo sapiens GN=MCAM PE=1 SV=2	1.092	0.126973	0.971634	1.123	0.167358	1.21986	1.09575	1.14385
P55210	Caspase-7 OS=Homo sapiens GN=CASP7 PE=1 SV=1	1.057	0.0799754	0.652148	1.123	0.167358	1.21986	0.936006	0.727109
Q8IYQ7	Threonine synthase-like 1 OS=Homo sapiens GN=THNSL1 PE=1 SV=2	1.03	0.0426443	0.398373	1.123	0.167358	1.21986	0.809118	0.524257
Q96ST3	Paired amphipathic helix protein Sin3a OS=Homo sapiens GN=SIN3A PE=1 SV=2	1.001	0.00144197	0.118282	1.123	0.167358	1.21986	0.669073	0.358066
O75376	Nuclear receptor corepressor 1 OS=Homo sapiens GN=NCOR1 PE=1 SV=2	0.972	-0.0409718	-0.170046	1.123	0.167358	1.21986	0.524909	0.230494
Q13613	Myotubularin-related protein 1 OS=Homo sapiens GN=MTMR1 PE=1 SV=4	0.955	-0.0664274	-0.343092	1.123	0.167358	1.21986	0.438386	0.17099
Q9H6W3	Bifunctional lysine-specific demethylase and histidyl-hydroxylase NO66 OS=Homo sapiens GN=NO66 PE=1 SV=2	1.471	0.556797	3.89356	1.122	0.166073	1.21124	2.5524	0.511454
Q9UHR4	Brain-specific angiogenesis inhibitor 1-associated protein 2-like protein 1 OS=Homo sapiens GN=BAIAP2L1 PE=1 SV=2	1.197	0.259423	1.87203	1.122	0.166073	1.21124	1.54163	0.871592
P32969	60S ribosomal protein L9 OS=Homo sapiens GN=RPL9 PE=1 SV=1	1.012	0.0172093	0.225466	1.122	0.166073	1.21124	0.718354	0.416985
P62834	Ras-related protein Rap-1A OS=Homo sapiens GN=RAP1A PE=1 SV=1	1.148	0.199123	1.46211	1.121	0.164786	1.20261	1.33236	1.20902
Q8TDB6	E3 ubiquitin-protein ligase DTX3L OS=Homo sapiens GN=DTX3L PE=1 SV=1	1.051	0.0717627	0.596318	1.121	0.164786	1.20261	0.899466	0.684137
Q16762	Thiosulfate sulfurtransferase OS=Homo sapiens GN=TST PE=1 SV=4	1.024	0.0342157	0.341076	1.121	0.164786	1.20261	0.771845	0.489365
Q9BXK5	Bcl-2-like protein 13 OS=Homo sapiens GN=BCL2L13 PE=1 SV=1	1.023	0.0328061	0.331493	1.121	0.164786	1.20261	0.767054	0.483106
O00461	Golgi integral membrane protein 4 OS=Homo sapiens GN=GOLIM4 PE=1 SV=1	0.8	-0.321928	-2.07997	1.121	0.164786	1.20261	-0.43868	0.0789732
P01130	Low-density lipoprotein receptor OS=Homo sapiens GN=LDLR PE=1 SV=1	1.155	0.207893	1.52172	1.12	0.163499	1.19398	1.35785	1.11656
Q5GLZ8	Probable E3 ubiquitin-protein ligase HERC4 OS=Homo sapiens GN=HERC4 PE=1 SV=1	1.07	0.0976108	0.772033	1.12	0.163499	1.19398	0.983005	0.870989
Q92552	28S ribosomal protein S27, mitochondrial OS=Homo sapiens GN=MRPS27 PE=1 SV=3	1.052	0.0731347	0.605645	1.119	0.16221	1.18533	0.895489	0.700535
P04792	Heat shock protein beta-1 OS=Homo sapiens GN=HSPB1 PE=1 SV=2	1.145	0.195348	1.43644	1.118	0.16092	1.17668	1.30656	1.20013
Q12768	WASH complex subunit strumpellin OS=Homo sapiens GN=KIAA0196 PE=1 SV=1	1.142	0.191563	1.41071	1.118	0.16092	1.17668	1.2937	1.24089
Q9H4A6	Golgi phosphoprotein 3 OS=Homo sapiens GN=GOLPH3 PE=1 SV=1	1.073	0.10165	0.799491	1.118	0.16092	1.17668	0.988086	0.920577
P11532	Dystrophin OS=Homo sapiens GN=DMD PE=1 SV=3	1.053	0.0745054	0.614963	1.118	0.16092	1.17668	0.895822	0.713511
P61353	60S ribosomal protein L27 OS=Homo sapiens GN=RPL27 PE=1 SV=2	1.018	0.0257376	0.283441	1.118	0.16092	1.17668	0.730061	0.456532
Q8IWJ2	GRIP and coiled-coil domain-containing protein 2 OS=Homo sapiens GN=GCC2 PE=1 SV=4	1.009	0.0129262	0.19635	1.118	0.16092	1.17668	0.686515	0.40369
Q96JB2	Conserved oligomeric Golgi complex subunit 3 OS=Homo sapiens GN=COG3 PE=1 SV=3	0.88	-0.184425	-1.14523	1.118	0.16092	1.17668	0.0157247	0.00376083
P0DJ93	Small integral membrane protein 13 OS=Homo sapiens GN=SMIM13 PE=3 SV=1	1.088	0.121679	0.935644	1.117	0.159629	1.16802	1.05183	1.15466
P48047	ATP synthase subunit O, mitochondrial OS=Homo sapiens GN=ATP5O PE=1 SV=1	1.043	0.0607392	0.52138	1.117	0.159629	1.16802	0.8447	0.633162
P78346	Ribonuclease P protein subunit p30 OS=Homo sapiens GN=RPP30 PE=1 SV=1	1.152	0.204141	1.49622	1.115	0.157044	1.15068	1.32345	1.08281
P27695	DNA-(apurinic or apyrimidinic site) lyase OS=Homo sapiens GN=APEX1 PE=1 SV=2	1.069	0.0962619	0.762862	1.115	0.157044	1.15068	0.95677	0.895175
Q9Y617	Phosphoserine aminotransferase OS=Homo sapiens GN=PSAT1 PE=1 SV=2	1.056	0.0786098	0.642865	1.115	0.157044	1.15068	0.896771	0.755348
P06454	Prothymosin alpha OS=Homo sapiens GN=PTMA PE=1 SV=2	1.184	0.243669	1.76493	1.114	0.155749	1.14199	1.45346	0.87163
Q9BTE3	Mini-chromosome maintenance complex-binding protein OS=Homo sapiens GN=MCMBP PE=1 SV=2	1.083	0.115033	0.890469	1.114	0.155749	1.14199	1.01623	1.10576
P41743	Protein kinase C iota type OS=Homo sapiens GN=PRKCI PE=1 SV=2	1.032	0.045443	0.417397	1.114	0.155749	1.14199	0.779696	0.557647
Q6NYC8	Phostensin OS=Homo sapiens GN=PPP1R18 PE=1 SV=1	1.071	0.0989585	0.781194	1.113	0.154454	1.1333	0.957249	0.936322
Q9NV31	U3 small nucleolar ribonucleoprotein protein IMP3 OS=Homo sapiens GN=IMP3 PE=1 SV=1	1.065	0.0908534	0.726097	1.113	0.154454	1.1333	0.9297	0.86248
O95684	FGFR1 oncogene partner OS=Homo sapiens GN=FGFR1OP PE=1 SV=1	1.015	0.0214797	0.254497	1.113	0.154454	1.1333	0.6939	0.444455
O15228	Dihydroxyacetone phosphate acyltransferase OS=Homo sapiens GN=GNPAT PE=1 SV=1	0.983	-0.0247367	-0.0596804	1.113	0.154454	1.1333	0.536812	0.272871
Q16698	2,4-dienoyl-CoA reductase, mitochondrial OS=Homo sapiens GN=DECR1 PE=1 SV=1	1.034	0.0482362	0.436386	1.112	0.153157	1.1246	0.780496	0.577812
Q96HA7	Tonsoku-like protein OS=Homo sapiens GN=TONSL PE=1 SV=2	0.955	-0.0664274	-0.343092	1.112	0.153157	1.1246	0.390757	0.162091
P42126	Enoyl-CoA delta isomerase 1, mitochondrial OS=Homo sapiens GN=ECI1 PE=1 SV=1	1.181	0.240009	1.74005	1.111	0.151859	1.1159	1.42797	0.863356
Q86WJ1	Chromodomain-helicase-DNA-binding protein 1-like OS=Homo sapiens GN=CHD1L PE=1 SV=2	1.174	0.231432	1.68175	1.111	0.151859	1.1159	1.39882	0.896032
P42345	Serine/threonine-protein kinase mTOR OS=Homo sapiens GN=MTOR PE=1 SV=1	1.046	0.0648829	0.549549	1.111	0.151859	1.1159	0.832724	0.680524
Q86U44	N6-adenosine-methyltransferase 70 kDa subunit OS=Homo sapiens GN=METTL3 PE=1 SV=2	1.026	0.0370307	0.360212	1.111	0.151859	1.1159	0.738055	0.521114
Q96D15	Reticulocalbin-3 OS=Homo sapiens GN=RCN3 PE=1 SV=1	1.216	0.282143	2.02647	1.11	0.15056	1.10718	1.56683	0.740736
Q8NHQ8	Ras association domain-containing protein 8 OS=Homo sapiens GN=RASSF8 PE=1 SV=2	1.139	0.187768	1.38492	1.11	0.15056	1.10718	1.24605	1.15085
P38646	Stress-70 protein, mitochondrial OS=Homo sapiens GN=HSPA9 PE=1 SV=2	1.089	0.123004	0.944654	1.11	0.15056	1.10718	1.02592	1.29823
Q9P2K8	eIF-2-alpha kinase GCN2 OS=Homo sapiens GN=EIF2AK4 PE=1 SV=3	1.077	0.107018	0.835984	1.11	0.15056	1.10718	0.971584	1.05414
O75044	SLIT-ROBO Rho GTPase-activating protein 2 OS=Homo sapiens GN=SRGAP2 PE=1 SV=2	1.075	0.104337	0.817755	1.11	0.15056	1.10718	0.96247	1.02224
Q99816	Tumor susceptibility gene 101 protein OS=Homo sapiens GN=TSG101 PE=1 SV=2	1.06	0.0840643	0.679943	1.11	0.15056	1.10718	0.893564	0.825678
Q9Y530	O-acetyl-ADP-ribose deacetylase 1 OS=Homo sapiens GN=OARD1 PE=1 SV=2	1.009	0.0129262	0.19635	1.11	0.15056	1.10718	0.651767	0.410874
P43897	Elongation factor Ts, mitochondrial OS=Homo sapiens GN=TSFM PE=1 SV=2	1.05	0.0703893	0.586982	1.109	0.149259	1.09846	0.842722	0.726833
Q9HA64	Ketosamine-3-kinase OS=Homo sapiens GN=FN3KRP PE=1 SV=2	0.98	-0.0291463	-0.0896567	1.109	0.149259	1.09846	0.504402	0.258182
Q9BYN8	28S ribosomal protein S26, mitochondrial OS=Homo sapiens GN=MRPS26 PE=1 SV=1	0.933	-0.100051	-0.571663	1.109	0.149259	1.09846	0.263399	0.0939438
O75521	Enoyl-CoA delta isomerase 2, mitochondrial OS=Homo sapiens GN=ECI2 PE=1 SV=4	1.084	0.116365	0.899521	1.108	0.147958	1.08973	0.994626	1.21689
O43663	Protein regulator of cytokinesis 1 OS=Homo sapiens GN=PRC1 PE=1 SV=2	1.173	0.230203	1.67339	1.107	0.146655	1.08099	1.37719	0.870099
Q9P265	Disco-interacting protein 2 homolog B OS=Homo sapiens GN=DIP2B PE=1 SV=3	1.047	0.0662614	0.558921	1.107	0.146655	1.08099	0.819958	0.707275
Q13614	Myotubularin-related protein 2 OS=Homo sapiens GN=MTMR2 PE=1 SV=4	0.914	-0.129734	-0.773447	1.107	0.146655	1.08099	0.153773	0.047996
P30622	CAP-Gly domain-containing linker protein 1 OS=Homo sapiens GN=CLIP1 PE=1 SV=2	1.208	0.27262	1.96174	1.106	0.145351	1.07225	1.51699	0.740994
Q8IWV7	E3 ubiquitin-protein ligase UBR1 OS=Homo sapiens GN=UBR1 PE=1 SV=1	1.144	0.194087	1.42787	1.106	0.145351	1.07225	1.25006	1.04599
Q9H6T3	RNA polymerase II-associated protein 3 OS=Homo sapiens GN=RPAP3 PE=1 SV=2	0.995	-0.00723157	0.0593188	1.106	0.145351	1.07225	0.565783	0.332718
O15213	WD repeat-containing protein 46 OS=Homo sapiens GN=WDR46 PE=1 SV=3	0.973	-0.0394883	-0.159961	1.106	0.145351	1.07225	0.456143	0.226011
Q8N954	G patch domain-containing protein 11 OS=Homo sapiens GN=GPATCH11 PE=1 SV=3	0.898	-0.155213	-0.94665	1.106	0.145351	1.07225	0.0627989	0.017527
Q2TAY7	WD40 repeat-containing protein SMU1 OS=Homo sapiens GN=SMU1 PE=1 SV=2	1.037	0.0524159	0.464799	1.105	0.144046	1.06349	0.764147	0.623985
Q8NAN2	Mitoguardin-1 OS=Homo sapiens GN=FAM73A PE=1 SV=1	1.067	0.0935602	0.744497	1.104	0.14274	1.05473	0.899614	0.963764
P06756	Integrin alpha-V OS=Homo sapiens GN=ITGAV PE=1 SV=2	1.02	0.0285692	0.30269	1.103	0.141433	1.04596	0.674327	0.493944
O15372	Eukaryotic translation initiation factor 3 subunit H OS=Homo sapiens GN=EIF3H PE=1 SV=1	1.161	0.215368	1.57254	1.102	0.140124	1.03719	1.30486	0.890056
Q15007	Pre-mRNA-splicing regulator WTAP OS=Homo sapiens GN=WTAP PE=1 SV=2	1.141	0.190299	1.40212	1.102	0.140124	1.03719	1.21965	1.02438
Q9NVM4	Protein arginine N-methyltransferase 7 OS=Homo sapiens GN=PRMT7 PE=1 SV=1	1.136	0.183963	1.35905	1.102	0.140124	1.03719	1.19812	1.07057
Q9BW92	Threonine--tRNA ligase, mitochondrial OS=Homo sapiens GN=TARS2 PE=1 SV=1	1.069	0.0962619	0.762862	1.102	0.140124	1.03719	0.900024	1.01647
P13995	Bifunctional methylenetetrahydrofolate dehydrogenase/cyclohydrolase, mitochondrial OS=Homo sapiens GN=MTHFD2 PE=1 SV=2	1.042	0.0593553	0.511974	1.102	0.140124	1.03719	0.774579	0.681746
P23634	Plasma membrane calcium-transporting ATPase 4 OS=Homo sapiens GN=ATP2B4 PE=1 SV=2	1.053	0.0745054	0.614963	1.101	0.138814	1.0284	0.821681	0.804365
P04818	Thymidylate synthase OS=Homo sapiens GN=TYMS PE=1 SV=3	1.049	0.0690147	0.577637	1.101	0.138814	1.0284	0.803018	0.758961
O94808	Glutamine--fructose-6-phosphate aminotransferase [isomerizing] 2 OS=Homo sapiens GN=GFPT2 PE=1 SV=3	1.045	0.0635029	0.540168	1.101	0.138814	1.0284	0.784284	0.716467
Q06124	Tyrosine-protein phosphatase non-receptor type 11 OS=Homo sapiens GN=PTPN11 PE=1 SV=2	1.033	0.0468403	0.426896	1.101	0.138814	1.0284	0.727648	0.602905
P23434	Glycine cleavage system H protein, mitochondrial OS=Homo sapiens GN=GCSH PE=1 SV=2	1.03	0.0426443	0.398373	1.101	0.138814	1.0284	0.713386	0.577209
P46934	E3 ubiquitin-protein ligase NEDD4 OS=Homo sapiens GN=NEDD4 PE=1 SV=4	1	0	0.108479	1.101	0.138814	1.0284	0.568439	0.363417
Q8N1F8	Serine/threonine-protein kinase 11-interacting protein OS=Homo sapiens GN=STK11IP PE=1 SV=3	0.986	-0.0203404	-0.0297948	1.101	0.138814	1.0284	0.499302	0.285302
P30049	ATP synthase subunit delta, mitochondrial OS=Homo sapiens GN=ATP5D PE=1 SV=2	0.978	-0.0320936	-0.109693	1.101	0.138814	1.0284	0.459353	0.245921
Q9UPT8	Zinc finger CCCH domain-containing protein 4 OS=Homo sapiens GN=ZC3H4 PE=1 SV=3	0.946	-0.0800879	-0.435956	1.101	0.138814	1.0284	0.296222	0.121907
O95359	Transforming acidic coiled-coil-containing protein 2 OS=Homo sapiens GN=TACC2 PE=1 SV=3	1.055	0.077243	0.633572	1.1	0.137504	1.01961	0.826589	0.835527
Q6ZSR9	Uncharacterized protein FLJ45252 OS=Homo sapiens PE=2 SV=2	1.025	0.0356239	0.350648	1.1	0.137504	1.01961	0.685127	0.538908
Q96ER3	Protein SAAL1 OS=Homo sapiens GN=SAAL1 PE=1 SV=2	1.158	0.211635	1.54717	1.099	0.136191	1.0108	1.27898	0.880805
Q13144	Translation initiation factor eIF-2B subunit epsilon OS=Homo sapiens GN=EIF2B5 PE=1 SV=3	1.153	0.205393	1.50473	1.099	0.136191	1.0108	1.25777	0.90858
Q8TCT9	Minor histocompatibility antigen H13 OS=Homo sapiens GN=HM13 PE=1 SV=1	1.145	0.195348	1.43644	1.099	0.136191	1.0108	1.22362	0.96008
Q9BYG3	MKI67 FHA domain-interacting nucleolar phosphoprotein OS=Homo sapiens GN=NIFK PE=1 SV=1	1.122	0.166073	1.23743	1.099	0.136191	1.0108	1.12412	1.19411
Q13573	SNW domain-containing protein 1 OS=Homo sapiens GN=SNW1 PE=1 SV=1	1.048	0.0676387	0.568283	1.099	0.136191	1.0108	0.789544	0.759592
Q9Y3P9	Rab GTPase-activating protein 1 OS=Homo sapiens GN=RABGAP1 PE=1 SV=3	0.99	-0.0144996	0.00991132	1.099	0.136191	1.0108	0.510358	0.306486
P82673	28S ribosomal protein S35, mitochondrial OS=Homo sapiens GN=MRPS35 PE=1 SV=1	1.066	0.0922074	0.7353	1.098	0.134878	1.002	0.868648	1.01336
Q15003	Condensin complex subunit 2 OS=Homo sapiens GN=NCAPH PE=1 SV=3	1.032	0.045443	0.417397	1.098	0.134878	1.002	0.709696	0.604285
Q9H330	Transmembrane protein 245 OS=Homo sapiens GN=TMEM245 PE=1 SV=2	1.026	0.0370307	0.360212	1.098	0.134878	1.002	0.681104	0.552381
Q5VT25	Serine/threonine-protein kinase MRCK alpha OS=Homo sapiens GN=CDC42BPA PE=1 SV=1	0.952	-0.0709665	-0.373948	1.098	0.134878	1.002	0.314024	0.138228
Q9H0H0	Integrator complex subunit 2 OS=Homo sapiens GN=INTS2 PE=1 SV=2	0.866	-0.207561	-1.30251	1.098	0.134878	1.002	-0.150258	0.0374185
Q15910	Histone-lysine N-methyltransferase EZH2 OS=Homo sapiens GN=EZH2 PE=1 SV=2	0.758	-0.39973	-2.60887	1.098	0.134878	1.002	-0.803437	0.13463
O15320	cTAGE family member 5 OS=Homo sapiens GN=CTAGE5 PE=1 SV=4	1.142	0.191563	1.41071	1.097	0.133564	0.993177	1.20194	0.960653
P07203	Glutathione peroxidase 1 OS=Homo sapiens GN=GPX1 PE=1 SV=4	1.069	0.0962619	0.762862	1.097	0.133564	0.993177	0.87802	1.0808
P23381	Tryptophan--tRNA ligase, cytoplasmic OS=Homo sapiens GN=WARS PE=1 SV=2	1.057	0.0799754	0.652148	1.097	0.133564	0.993177	0.822663	0.885686
Q9NYL9	Tropomodulin-3 OS=Homo sapiens GN=TMOD3 PE=1 SV=1	1.049	0.0690147	0.577637	1.097	0.133564	0.993177	0.785407	0.783468
P39880	Homeobox protein cut-like 1 OS=Homo sapiens GN=CUX1 PE=1 SV=3	0.904	-0.145605	-0.88134	1.097	0.133564	0.993177	0.0559188	0.0167965
O43414	ERI1 exoribonuclease 3 OS=Homo sapiens GN=ERI3 PE=1 SV=2	1.064	0.0894982	0.716883	1.096	0.132248	0.984351	0.850617	1.00315
Q9H6E5	Speckle targeted PIP5K1A-regulated poly(A) polymerase OS=Homo sapiens GN=TUT1 PE=1 SV=2	1.055	0.077243	0.633572	1.096	0.132248	0.984351	0.808962	0.866715
Q9UKZ1	CCR4-NOT transcription complex subunit 11 OS=Homo sapiens GN=CNOT11 PE=1 SV=1	1.005	0.0071955	0.157393	1.096	0.132248	0.984351	0.570872	0.39896
Q5SW79	Centrosomal protein of 170 kDa OS=Homo sapiens GN=CEP170 PE=1 SV=1	1	0	0.108479	1.096	0.132248	0.984351	0.546415	0.366406
Q8IY95	Transmembrane protein 192 OS=Homo sapiens GN=TMEM192 PE=1 SV=1	1.216	0.282143	2.02647	1.095	0.130931	0.975518	1.501	0.66881
O95149	Snurportin-1 OS=Homo sapiens GN=SNUPN PE=1 SV=1	1.173	0.230203	1.67339	1.095	0.130931	0.975518	1.32445	0.78517
O60306	Intron-binding protein aquarius OS=Homo sapiens GN=AQR PE=1 SV=4	1.152	0.204141	1.49622	1.095	0.130931	0.975518	1.23587	0.878839
O95235	Kinesin-like protein KIF20A OS=Homo sapiens GN=KIF20A PE=1 SV=1	1.127	0.172488	1.28104	1.095	0.130931	0.975518	1.12828	1.06716
Q14674	Separin OS=Homo sapiens GN=ESPL1 PE=1 SV=3	1.122	0.166073	1.23743	1.095	0.130931	0.975518	1.10648	1.12495
P08670	Vimentin OS=Homo sapiens GN=VIM PE=1 SV=4	1.117	0.159629	1.19363	1.095	0.130931	0.975518	1.08457	1.19519
Q8NEB9	Phosphatidylinositol 3-kinase catalytic subunit type 3 OS=Homo sapiens GN=PIK3C3 PE=1 SV=1	0.952	-0.0709665	-0.373948	1.095	0.130931	0.975518	0.300785	0.134873
O94925	Glutaminase kidney isoform, mitochondrial OS=Homo sapiens GN=GLS PE=1 SV=1	1.144	0.194087	1.42787	1.094	0.129613	0.966676	1.19728	0.916742
Q9NWY4	UPF0609 protein C4orf27 OS=Homo sapiens GN=C4orf27 PE=1 SV=2	1.065	0.0908534	0.726097	1.094	0.129613	0.966676	0.846386	1.04636
Q8IWB1	Inositol 1,4,5-trisphosphate receptor-interacting protein OS=Homo sapiens GN=ITPRIP PE=1 SV=1	1.026	0.0370307	0.360212	1.094	0.129613	0.966676	0.663444	0.563959
Q9H8H0	Nucleolar protein 11 OS=Homo sapiens GN=NOL11 PE=1 SV=1	0.964	-0.0528949	-0.251099	1.094	0.129613	0.966676	0.357789	0.17928
Q9NX46	Poly(ADP-ribose) glycohydrolase ARH3 OS=Homo sapiens GN=ADPRHL2 PE=1 SV=1	1.155	0.207893	1.52172	1.093	0.128293	0.957827	1.23978	0.846617
Q13409	Cytoplasmic dynein 1 intermediate chain 2 OS=Homo sapiens GN=DYNC1I2 PE=1 SV=3	1.116	0.158337	1.18485	1.093	0.128293	0.957827	1.07134	1.17263
Q13423	NAD(P) transhydrogenase, mitochondrial OS=Homo sapiens GN=NNT PE=1 SV=3	1.113	0.154454	1.15845	1.093	0.128293	0.957827	1.05814	1.22061
P05387	60S acidic ribosomal protein P2 OS=Homo sapiens GN=RPLP2 PE=1 SV=1	1.113	0.154454	1.15845	1.093	0.128293	0.957827	1.05814	1.22061
Q00653	Nuclear factor NF-kappa-B p100 subunit OS=Homo sapiens GN=NFKB2 PE=1 SV=4	1.036	0.051024	0.455338	1.093	0.128293	0.957827	0.706582	0.662558
P52735	Guanine nucleotide exchange factor VAV2 OS=Homo sapiens GN=VAV2 PE=1 SV=2	1.02	0.0285692	0.30269	1.093	0.128293	0.957827	0.630259	0.515502
Q9NXE4	Sphingomyelin phosphodiesterase 4 OS=Homo sapiens GN=SMPD4 PE=1 SV=2	1.014	0.0200577	0.24483	1.093	0.128293	0.957827	0.601329	0.467647
Q96EV2	RNA-binding protein 33 OS=Homo sapiens GN=RBM33 PE=1 SV=3	0.958	-0.0619024	-0.312331	1.093	0.128293	0.957827	0.322748	0.154487
Q99439	Calponin-2 OS=Homo sapiens GN=CNN2 PE=1 SV=4	1.243	0.313826	2.24186	1.092	0.126973	0.948969	1.59541	0.610691
Q9Y4C2	TRPM8 channel-associated factor 1 OS=Homo sapiens GN=TCAF1 PE=1 SV=3	1.019	0.0271541	0.293071	1.092	0.126973	0.948969	0.62102	0.50961
P62899	60S ribosomal protein L31 OS=Homo sapiens GN=RPL31 PE=1 SV=1	0.963	-0.0543923	-0.261278	1.092	0.126973	0.948969	0.343845	0.173251
O00148	ATP-dependent RNA helicase DDX39A OS=Homo sapiens GN=DDX39A PE=1 SV=2	1.199	0.261832	1.8884	1.091	0.125651	0.940102	1.41425	0.686262
Q8N543	Prolyl 3-hydroxylase OGFOD1 OS=Homo sapiens GN=OGFOD1 PE=1 SV=1	1.116	0.158337	1.18485	1.091	0.125651	0.940102	1.06247	1.13666
Q13310	Polyadenylate-binding protein 4 OS=Homo sapiens GN=PABPC4 PE=1 SV=1	1.028	0.0398403	0.379311	1.091	0.125651	0.940102	0.659706	0.592005
Q16790	Carbonic anhydrase 9 OS=Homo sapiens GN=CA9 PE=1 SV=2	1.026	0.0370307	0.360212	1.091	0.125651	0.940102	0.650157	0.573398
P46779	60S ribosomal protein L28 OS=Homo sapiens GN=RPL28 PE=1 SV=3	1.17	0.226509	1.64827	1.09	0.124328	0.931228	1.28975	0.762938
O75746	Calcium-binding mitochondrial carrier protein Aralar1 OS=Homo sapiens GN=SLC25A12 PE=1 SV=2	1.164	0.219091	1.59785	1.09	0.124328	0.931228	1.26454	0.78497
P37198	Nuclear pore glycoprotein p62 OS=Homo sapiens GN=NUP62 PE=1 SV=3	1.116	0.158337	1.18485	1.09	0.124328	0.931228	1.05804	1.11954
P67775	Serine/threonine-protein phosphatase 2A catalytic subunit alpha isoform OS=Homo sapiens GN=PPP2CA PE=1 SV=1	1.026	0.0370307	0.360212	1.09	0.124328	0.931228	0.64572	0.576702
P49841	Glycogen synthase kinase-3 beta OS=Homo sapiens GN=GSK3B PE=1 SV=2	1.025	0.0356239	0.350648	1.09	0.124328	0.931228	0.640938	0.56745
Q93100	Phosphorylase b kinase regulatory subunit beta OS=Homo sapiens GN=PHKB PE=1 SV=3	1.013	0.0186342	0.235153	1.09	0.124328	0.931228	0.583191	0.465297
Q8N201	Integrator complex subunit 1 OS=Homo sapiens GN=INTS1 PE=1 SV=2	0.982	-0.0262051	-0.0696623	1.09	0.124328	0.931228	0.430783	0.261588
Q9HD26	Golgi-associated PDZ and coiled-coil motif-containing protein OS=Homo sapiens GN=GOPC PE=1 SV=1	1.362	0.445727	3.13851	1.089	0.123004	0.922346	2.03043	0.497528
Q8N9N8	Probable RNA-binding protein EIF1AD OS=Homo sapiens GN=EIF1AD PE=1 SV=1	1.162	0.21661	1.58098	1.089	0.123004	0.922346	1.25166	0.785724
P54578	Ubiquitin carboxyl-terminal hydrolase 14 OS=Homo sapiens GN=USP14 PE=1 SV=3	1.061	0.0854247	0.689191	1.089	0.123004	0.922346	0.805769	1.03872
Q9GZR7	ATP-dependent RNA helicase DDX24 OS=Homo sapiens GN=DDX24 PE=1 SV=1	0.982	-0.0262051	-0.0696623	1.089	0.123004	0.922346	0.426342	0.261227
Q7LBC6	Lysine-specific demethylase 3B OS=Homo sapiens GN=KDM3B PE=1 SV=2	1.137	0.185232	1.36768	1.088	0.121679	0.913456	1.14057	0.902645
P04083	Annexin A1 OS=Homo sapiens GN=ANXA1 PE=1 SV=2	1.105	0.144046	1.0877	1.088	0.121679	0.913456	1.00058	1.25734
Q9H773	dCTP pyrophosphatase 1 OS=Homo sapiens GN=DCTPP1 PE=1 SV=1	1.044	0.0621217	0.530779	1.088	0.121679	0.913456	0.722118	0.782793
Q15018	BRISC complex subunit Abro1 OS=Homo sapiens GN=FAM175B PE=1 SV=2	0.959	-0.0603973	-0.302099	1.088	0.121679	0.913456	0.305678	0.152838
Q7Z4W1	L-xylulose reductase OS=Homo sapiens GN=DCXR PE=1 SV=2	0.958	-0.0619024	-0.312331	1.088	0.121679	0.913456	0.300562	0.1489
Q96F86	Enhancer of mRNA-decapping protein 3 OS=Homo sapiens GN=EDC3 PE=1 SV=1	0.932	-0.101598	-0.582181	1.088	0.121679	0.913456	0.165637	0.0648794
P00491	Purine nucleoside phosphorylase OS=Homo sapiens GN=PNP PE=1 SV=2	0.884	-0.177882	-1.10075	1.088	0.121679	0.913456	-0.0936486	0.0264234
Q6ZW49	PAX-interacting protein 1 OS=Homo sapiens GN=PAXIP1 PE=1 SV=2	1.108	0.147958	1.11429	1.087	0.120352	0.904557	1.00942	1.18111
O60502	Protein O-GlcNAcase OS=Homo sapiens GN=MGEA5 PE=1 SV=2	1.055	0.077243	0.633572	1.087	0.120352	0.904557	0.769065	0.954603
Q05086	Ubiquitin-protein ligase E3A OS=Homo sapiens GN=UBE3A PE=1 SV=4	1.019	0.0271541	0.293071	1.087	0.120352	0.904557	0.598814	0.522108
Q9UPN7	Serine/threonine-protein phosphatase 6 regulatory subunit 1 OS=Homo sapiens GN=PPP6R1 PE=1 SV=5	1.018	0.0257376	0.283441	1.087	0.120352	0.904557	0.593999	0.513307
Q8N6S4	Ankyrin repeat domain-containing protein 13C OS=Homo sapiens GN=ANKRD13C PE=2 SV=2	0.957	-0.0634092	-0.322574	1.087	0.120352	0.904557	0.290991	0.14383
Q9NX18	Succinate dehydrogenase assembly factor 2, mitochondrial OS=Homo sapiens GN=SDHAF2 PE=1 SV=1	0.904	-0.145605	-0.88134	1.087	0.120352	0.904557	0.0116085	0.00360905
P62380	TATA box-binding protein-like protein 1 OS=Homo sapiens GN=TBPL1 PE=1 SV=1	1.163	0.217851	1.58942	1.086	0.119024	0.895649	1.24253	0.761161
Q14116	Interleukin-18 OS=Homo sapiens GN=IL18 PE=1 SV=1	1.108	0.147958	1.11429	1.086	0.119024	0.895649	1.00497	1.16128
Q9Y4W2	Ribosomal biogenesis protein LAS1L OS=Homo sapiens GN=LAS1L PE=1 SV=2	1.053	0.0745054	0.614963	1.086	0.119024	0.895649	0.755306	0.931976
Q9NX63	MICOS complex subunit MIC19 OS=Homo sapiens GN=CHCHD3 PE=1 SV=1	1.042	0.0593553	0.511974	1.086	0.119024	0.895649	0.703812	0.771066
O14920	Inhibitor of nuclear factor kappa-B kinase subunit beta OS=Homo sapiens GN=IKBKB PE=1 SV=1	0.994	-0.00868224	0.0494573	1.086	0.119024	0.895649	0.472553	0.332657
Q8IVM0	Coiled-coil domain-containing protein 50 OS=Homo sapiens GN=CCDC50 PE=1 SV=1	0.973	-0.0394883	-0.159961	1.086	0.119024	0.895649	0.367844	0.212885
Q14CX7	N-alpha-acetyltransferase 25, NatB auxiliary subunit OS=Homo sapiens GN=NAA25 PE=1 SV=1	0.959	-0.0603973	-0.302099	1.086	0.119024	0.895649	0.296775	0.150519
Q5T5U3	Rho GTPase-activating protein 21 OS=Homo sapiens GN=ARHGAP21 PE=1 SV=1	0.955	-0.0664274	-0.343092	1.086	0.119024	0.895649	0.276279	0.134961
P48449	Lanosterol synthase OS=Homo sapiens GN=LSS PE=1 SV=1	1.004	0.00575927	0.147629	1.085	0.117695	0.886735	0.517182	0.403431
P57088	Transmembrane protein 33 OS=Homo sapiens GN=TMEM33 PE=1 SV=2	0.945	-0.0816138	-0.446328	1.085	0.117695	0.886735	0.220204	0.0986151
Q8TAF3	WD repeat-containing protein 48 OS=Homo sapiens GN=WDR48 PE=1 SV=1	1.196	0.258217	1.86383	1.084	0.116365	0.877811	1.37082	0.657997
Q9H814	Phosphorylated adapter RNA export protein OS=Homo sapiens GN=PHAX PE=1 SV=1	1.115	0.157044	1.17605	1.084	0.116365	0.877811	1.02693	1.03715
P06748	Nucleophosmin OS=Homo sapiens GN=NPM1 PE=1 SV=2	1.045	0.0635029	0.540168	1.084	0.116365	0.877811	0.70899	0.827345
O95571	Persulfide dioxygenase ETHE1, mitochondrial OS=Homo sapiens GN=ETHE1 PE=1 SV=2	1.031	0.0440443	0.40789	1.084	0.116365	0.877811	0.642851	0.651538
Q96J01	THO complex subunit 3 OS=Homo sapiens GN=THOC3 PE=1 SV=1	0.979	-0.0306192	-0.0996698	1.084	0.116365	0.877811	0.389071	0.242622
Q8IW35	Centrosomal protein of 97 kDa OS=Homo sapiens GN=CEP97 PE=1 SV=1	0.977	-0.0335695	-0.119726	1.084	0.116365	0.877811	0.379043	0.231883
Q9UBB9	Tuftelin-interacting protein 11 OS=Homo sapiens GN=TFIP11 PE=1 SV=1	0.562	-0.831358	-5.54306	1.084	0.116365	0.877811	-2.33262	0.221859
Q9Y312	Protein AAR2 homolog OS=Homo sapiens GN=AAR2 PE=1 SV=2	1.119	0.16221	1.21117	1.083	0.115033	0.868879	1.04003	0.983669
P58107	Epiplakin OS=Homo sapiens GN=EPPK1 PE=1 SV=2	1.109	0.149259	1.12314	1.083	0.115033	0.868879	0.996008	1.09248
P62424	60S ribosomal protein L7a OS=Homo sapiens GN=RPL7A PE=1 SV=2	1.023	0.0328061	0.331493	1.083	0.115033	0.868879	0.600186	0.571915
Q16134	Electron transfer flavoprotein-ubiquinone oxidoreductase, mitochondrial OS=Homo sapiens GN=ETFDH PE=1 SV=2	0.971	-0.0424568	-0.180141	1.083	0.115033	0.868879	0.344369	0.200561
P78316	Nucleolar protein 14 OS=Homo sapiens GN=NOP14 PE=1 SV=3	0.93	-0.104697	-0.603249	1.083	0.115033	0.868879	0.132815	0.052394
Q9Y2H0	Disks large-associated protein 4 OS=Homo sapiens GN=DLGAP4 PE=1 SV=3	1.175	0.232661	1.6901	1.082	0.1137	0.85994	1.27502	0.698187
Q9Y606	tRNA pseudouridine synthase A, mitochondrial OS=Homo sapiens GN=PUS1 PE=1 SV=3	1.163	0.217851	1.58942	1.082	0.1137	0.85994	1.22468	0.734531
Q8IWV8	E3 ubiquitin-protein ligase UBR2 OS=Homo sapiens GN=UBR2 PE=1 SV=1	1.132	0.178874	1.32446	1.082	0.1137	0.85994	1.0922	0.874873
Q8WXX5	DnaJ homolog subfamily C member 9 OS=Homo sapiens GN=DNAJC9 PE=1 SV=1	1.12	0.163499	1.21994	1.082	0.1137	0.85994	1.03994	0.962142
Q8N5M1	ATP synthase mitochondrial F1 complex assembly factor 2 OS=Homo sapiens GN=ATPAF2 PE=1 SV=1	1.029	0.041243	0.388847	1.082	0.1137	0.85994	0.624394	0.638933
Q96RE7	Nucleus accumbens-associated protein 1 OS=Homo sapiens GN=NACC1 PE=1 SV=1	1.02	0.0285692	0.30269	1.082	0.1137	0.85994	0.581315	0.545859
P55145	Mesencephalic astrocyte-derived neurotrophic factor OS=Homo sapiens GN=MANF PE=1 SV=3	0.999	-0.00144342	0.0986665	1.082	0.1137	0.85994	0.479303	0.369293
Q9NQS7	Inner centromere protein OS=Homo sapiens GN=INCENP PE=1 SV=3	1.164	0.219091	1.59785	1.081	0.112367	0.850992	1.22442	0.724794
Q9Y4X5	E3 ubiquitin-protein ligase ARIH1 OS=Homo sapiens GN=ARIH1 PE=1 SV=2	1.137	0.185232	1.36768	1.081	0.112367	0.850992	1.10934	0.836658
Q96T58	Msx2-interacting protein OS=Homo sapiens GN=SPEN PE=1 SV=1	1.064	0.0894982	0.716883	1.081	0.112367	0.850992	0.783937	1.26503
P15311	Ezrin OS=Homo sapiens GN=EZR PE=1 SV=4	1.043	0.0607392	0.52138	1.081	0.112367	0.850992	0.686186	0.823739
Q969U7	Proteasome assembly chaperone 2 OS=Homo sapiens GN=PSMG2 PE=1 SV=1	1.017	0.0243197	0.273802	1.081	0.112367	0.850992	0.562397	0.520238
Q14232	Translation initiation factor eIF-2B subunit alpha OS=Homo sapiens GN=EIF2B1 PE=1 SV=1	0.975	-0.0365259	-0.139822	1.081	0.112367	0.850992	0.355585	0.219198
P18077	60S ribosomal protein L35a OS=Homo sapiens GN=RPL35A PE=1 SV=2	0.881	-0.182786	-1.13409	1.081	0.112367	0.850992	-0.141551	0.0410459
P22033	Methylmalonyl-CoA mutase, mitochondrial OS=Homo sapiens GN=MUT PE=1 SV=4	1.159	0.212881	1.55563	1.08	0.111031	0.842036	1.19883	0.734813
P02794	Ferritin heavy chain OS=Homo sapiens GN=FTH1 PE=1 SV=2	1.154	0.206643	1.51323	1.08	0.111031	0.842036	1.17763	0.752674
P60880	Synaptosomal-associated protein 25 OS=Homo sapiens GN=SNAP25 PE=1 SV=1	1.13	0.176323	1.30711	1.08	0.111031	0.842036	1.07457	0.867507
Q9NRY5	Protein FAM114A2 OS=Homo sapiens GN=FAM114A2 PE=1 SV=4	1.108	0.147958	1.11429	1.08	0.111031	0.842036	0.978163	1.05537
Q86VS8	Protein Hook homolog 3 OS=Homo sapiens GN=HOOK3 PE=1 SV=2	1.096	0.132248	1.00749	1.08	0.111031	0.842036	0.924764	1.24565
Q03169	Tumor necrosis factor alpha-induced protein 2 OS=Homo sapiens GN=TNFAIP2 PE=2 SV=2	1.054	0.0758749	0.624273	1.08	0.111031	0.842036	0.733154	1.02752
Q9NP74	Palmdelphin OS=Homo sapiens GN=PALMD PE=1 SV=1	0.979	-0.0306192	-0.0996698	1.08	0.111031	0.842036	0.371183	0.240328
Q14739	Lamin-B receptor OS=Homo sapiens GN=LBR PE=1 SV=2	0.736	-0.442222	-2.89773	1.08	0.111031	0.842036	-1.02785	0.167469
Q9P0V9	Septin-10 OS=Homo sapiens GN=SEPT10 PE=1 SV=2	1.218	0.284514	2.04259	1.079	0.109695	0.833071	1.43783	0.596081
Q14241	Transcription elongation factor B polypeptide 3 OS=Homo sapiens GN=TCEB3 PE=1 SV=2	1.195	0.257011	1.85563	1.079	0.109695	0.833071	1.34435	0.635707
Q13427	Peptidyl-prolyl cis-trans isomerase G OS=Homo sapiens GN=PPIG PE=1 SV=2	1.151	0.202888	1.4877	1.079	0.109695	0.833071	1.16039	0.756896
Q9BU76	Multiple myeloma tumor-associated protein 2 OS=Homo sapiens GN=MMTAG2 PE=1 SV=1	1.145	0.195348	1.43644	1.079	0.109695	0.833071	1.13476	0.7814
P08183	Multidrug resistance protein 1 OS=Homo sapiens GN=ABCB1 PE=1 SV=3	1.129	0.175045	1.29843	1.079	0.109695	0.833071	1.06575	0.86378
P33176	Kinesin-1 heavy chain OS=Homo sapiens GN=KIF5B PE=1 SV=1	1.054	0.0758749	0.624273	1.079	0.109695	0.833071	0.728672	1.0429
Q9HD23	Magnesium transporter MRS2 homolog, mitochondrial OS=Homo sapiens GN=MRS2 PE=1 SV=1	1.047	0.0662614	0.558921	1.079	0.109695	0.833071	0.695996	0.907292
P49790	Nuclear pore complex protein Nup153 OS=Homo sapiens GN=NUP153 PE=1 SV=2	1.045	0.0635029	0.540168	1.079	0.109695	0.833071	0.68662	0.873602
P09429	High mobility group protein B1 OS=Homo sapiens GN=HMGB1 PE=1 SV=3	1.025	0.0356239	0.350648	1.079	0.109695	0.833071	0.59186	0.608413
Q14694	Ubiquitin carboxyl-terminal hydrolase 10 OS=Homo sapiens GN=USP10 PE=1 SV=2	1.024	0.0342157	0.341076	1.079	0.109695	0.833071	0.587074	0.597551
Q86YM7	Homer protein homolog 1 OS=Homo sapiens GN=HOMER1 PE=1 SV=2	1.199	0.261832	1.8884	1.078	0.108357	0.824098	1.35625	0.623352
O43169	Cytochrome b5 type B OS=Homo sapiens GN=CYB5B PE=1 SV=2	1.133	0.180148	1.33312	1.078	0.108357	0.824098	1.07861	0.831152
O43464	Serine protease HTRA2, mitochondrial OS=Homo sapiens GN=HTRA2 PE=1 SV=2	1.05	0.0703893	0.586982	1.078	0.108357	0.824098	0.70554	0.974749
Q12774	Rho guanine nucleotide exchange factor 5 OS=Homo sapiens GN=ARHGEF5 PE=1 SV=3	1.031	0.0440443	0.40789	1.078	0.108357	0.824098	0.615994	0.683174
Q96AB3	Isochorismatase domain-containing protein 2 OS=Homo sapiens GN=ISOC2 PE=1 SV=1	0.891	-0.166503	-1.0234	1.078	0.108357	0.824098	-0.0996507	0.030776
Q15043	Zinc transporter ZIP14 OS=Homo sapiens GN=SLC39A14 PE=1 SV=3	1.211	0.276199	1.98607	1.077	0.107018	0.815117	1.40059	0.598487
Q86UV5	Ubiquitin carboxyl-terminal hydrolase 48 OS=Homo sapiens GN=USP48 PE=1 SV=1	1.102	0.140124	1.06104	1.077	0.107018	0.815117	0.938077	1.08106
Q9H832	Ubiquitin-conjugating enzyme E2 Z OS=Homo sapiens GN=UBE2Z PE=1 SV=2	1.097	0.133564	1.01644	1.077	0.107018	0.815117	0.915777	1.15679
Q9UQ80	Proliferation-associated protein 2G4 OS=Homo sapiens GN=PA2G4 PE=1 SV=3	1.052	0.0731347	0.605645	1.077	0.107018	0.815117	0.710381	1.03063
P78345	Ribonuclease P protein subunit p38 OS=Homo sapiens GN=RPP38 PE=1 SV=2	1.031	0.0440443	0.40789	1.077	0.107018	0.815117	0.611504	0.68904
P46937	Transcriptional coactivator YAP1 OS=Homo sapiens GN=YAP1 PE=1 SV=2	1.003	0.00432161	0.137857	1.077	0.107018	0.815117	0.476487	0.405231
Q9BW19	Kinesin-like protein KIFC1 OS=Homo sapiens GN=KIFC1 PE=1 SV=2	1.129	0.175045	1.29843	1.076	0.105678	0.806127	1.05228	0.834788
Q9Y2L5	Trafficking protein particle complex subunit 8 OS=Homo sapiens GN=TRAPPC8 PE=1 SV=2	1.009	0.0129262	0.19635	1.076	0.105678	0.806127	0.501238	0.458546
Q04721	Neurogenic locus notch homolog protein 2 OS=Homo sapiens GN=NOTCH2 PE=1 SV=3	1.148	0.199123	1.46211	1.075	0.104337	0.79713	1.12962	0.73937
O95453	Poly(A)-specific ribonuclease PARN OS=Homo sapiens GN=PARN PE=1 SV=1	1.139	0.187768	1.38492	1.075	0.104337	0.79713	1.09102	0.775953
O75530	Polycomb protein EED OS=Homo sapiens GN=EED PE=1 SV=2	1.115	0.157044	1.17605	1.075	0.104337	0.79713	0.986592	0.91799
Q9UBQ5	Eukaryotic translation initiation factor 3 subunit K OS=Homo sapiens GN=EIF3K PE=1 SV=1	1.054	0.0758749	0.624273	1.075	0.104337	0.79713	0.710701	1.11328
Q96A49	Synapse-associated protein 1 OS=Homo sapiens GN=SYAP1 PE=1 SV=1	1.035	0.0496308	0.445866	1.075	0.104337	0.79713	0.621498	0.756135
Q9Y5P6	Mannose-1-phosphate guanyltransferase beta OS=Homo sapiens GN=GMPPB PE=1 SV=2	1.009	0.0129262	0.19635	1.075	0.104337	0.79713	0.49674	0.460613
Q9UBT7	Alpha-catulin OS=Homo sapiens GN=CTNNAL1 PE=1 SV=2	1	0	0.108479	1.075	0.104337	0.79713	0.452804	0.383111
O14981	TATA-binding protein-associated factor 172 OS=Homo sapiens GN=BTAF1 PE=1 SV=2	0.999	-0.00144342	0.0986665	1.075	0.104337	0.79713	0.447898	0.3751
Q06546	GA-binding protein alpha chain OS=Homo sapiens GN=GABPA PE=1 SV=1	0.957	-0.0634092	-0.322574	1.075	0.104337	0.79713	0.237278	0.127963
Q96DZ1	Endoplasmic reticulum lectin 1 OS=Homo sapiens GN=ERLEC1 PE=1 SV=1	1.23	0.298658	2.13874	1.074	0.102994	0.788123	1.46343	0.560294
Q9H6T0	Epithelial splicing regulatory protein 2 OS=Homo sapiens GN=ESRP2 PE=1 SV=1	1.143	0.192825	1.4193	1.074	0.102994	0.788123	1.10371	0.751292
Q96IR7	4-hydroxyphenylpyruvate dioxygenase-like protein OS=Homo sapiens GN=HPDL PE=1 SV=1	1.118	0.16092	1.20241	1.074	0.102994	0.788123	0.995265	0.883947
P07195	L-lactate dehydrogenase B chain OS=Homo sapiens GN=LDHB PE=1 SV=2	1.087	0.120352	0.926626	1.074	0.102994	0.788123	0.857374	1.2898
Q9UJW0	Dynactin subunit 4 OS=Homo sapiens GN=DCTN4 PE=1 SV=1	1.055	0.077243	0.633572	1.074	0.102994	0.788123	0.710848	1.16156
P55263	Adenosine kinase OS=Homo sapiens GN=ADK PE=1 SV=2	1.055	0.077243	0.633572	1.074	0.102994	0.788123	0.710848	1.16156
P43490	Nicotinamide phosphoribosyltransferase OS=Homo sapiens GN=NAMPT PE=1 SV=1	1.048	0.0676387	0.568283	1.074	0.102994	0.788123	0.678203	0.990164
Q9BQE5	Apolipoprotein L2 OS=Homo sapiens GN=APOL2 PE=1 SV=1	1.04	0.0565835	0.493131	1.074	0.102994	0.788123	0.640627	0.841447
P20810	Calpastatin OS=Homo sapiens GN=CAST PE=1 SV=4	1.005	0.0071955	0.157393	1.074	0.102994	0.788123	0.472758	0.426532
O75717	WD repeat and HMG-box DNA-binding protein 1 OS=Homo sapiens GN=WDHD1 PE=1 SV=1	0.995	-0.00723157	0.0593188	1.074	0.102994	0.788123	0.423721	0.344694
Q9Y2H6	Fibronectin type-III domain-containing protein 3A OS=Homo sapiens GN=FNDC3A PE=1 SV=4	0.977	-0.0335695	-0.119726	1.074	0.102994	0.788123	0.334199	0.224771
Q5JRX3	Presequence protease, mitochondrial OS=Homo sapiens GN=PITRM1 PE=1 SV=3	1.042	0.0593553	0.511974	1.073	0.10165	0.779108	0.645541	0.886429
Q9H3S7	Tyrosine-protein phosphatase non-receptor type 23 OS=Homo sapiens GN=PTPN23 PE=1 SV=1	1.038	0.0538064	0.474252	1.073	0.10165	0.779108	0.62668	0.818454
P82933	28S ribosomal protein S9, mitochondrial OS=Homo sapiens GN=MRPS9 PE=1 SV=2	0.992	-0.011588	0.029704	1.073	0.10165	0.779108	0.404406	0.32263
A6NDG6	Glycerol-3-phosphate phosphatase OS=Homo sapiens GN=PGP PE=1 SV=1	0.889	-0.169745	-1.04544	1.073	0.10165	0.779108	-0.133165	0.0420462
Q15154	Pericentriolar material 1 protein OS=Homo sapiens GN=PCM1 PE=1 SV=4	1.185	0.244887	1.77321	1.072	0.100305	0.770085	1.27165	0.621295
Q16836	Hydroxyacyl-coenzyme A dehydrogenase, mitochondrial OS=Homo sapiens GN=HADH PE=1 SV=3	1.155	0.207893	1.52172	1.072	0.100305	0.770085	1.1459	0.695179
Q9UGP8	Translocation protein SEC63 homolog OS=Homo sapiens GN=SEC63 PE=1 SV=2	1.115	0.157044	1.17605	1.072	0.100305	0.770085	0.97307	0.882985
Q08AM6	Protein VAC14 homolog OS=Homo sapiens GN=VAC14 PE=1 SV=1	1.051	0.0717627	0.596318	1.072	0.100305	0.770085	0.683202	1.09406
P27144	Adenylate kinase 4, mitochondrial OS=Homo sapiens GN=AK4 PE=1 SV=1	1.03	0.0426443	0.398373	1.072	0.100305	0.770085	0.584229	0.707571
Q13136	Liprin-alpha-1 OS=Homo sapiens GN=PPFIA1 PE=1 SV=1	0.993	-0.0101344	0.0395853	1.072	0.100305	0.770085	0.404835	0.3304
P82094	TATA element modulatory factor OS=Homo sapiens GN=TMF1 PE=1 SV=2	0.989	-0.0159576	0	1.072	0.100305	0.770085	0.385043	0.30103
O76031	ATP-dependent Clp protease ATP-binding subunit clpX-like, mitochondrial OS=Homo sapiens GN=CLPX PE=1 SV=2	1.048	0.0676387	0.568283	1.071	0.0989585	0.761054	0.664668	1.03773
Q7KZ85	Transcription elongation factor SPT6 OS=Homo sapiens GN=SUPT6H PE=1 SV=2	1.011	0.015783	0.215771	1.071	0.0989585	0.761054	0.488412	0.48929
Q12899	Tripartite motif-containing protein 26 OS=Homo sapiens GN=TRIM26 PE=1 SV=1	0.966	-0.0499049	-0.230772	1.071	0.0989585	0.761054	0.265141	0.162771
Q8TEQ6	Gem-associated protein 5 OS=Homo sapiens GN=GEMIN5 PE=1 SV=3	1.099	0.136191	1.0343	1.07	0.0976108	0.752014	0.893158	1.00096
P23528	Cofilin-1 OS=Homo sapiens GN=CFL1 PE=1 SV=3	1.084	0.116365	0.899521	1.07	0.0976108	0.752014	0.825767	1.24635
P52594	Arf-GAP domain and FG repeat-containing protein 1 OS=Homo sapiens GN=AGFG1 PE=1 SV=2	1.045	0.0635029	0.540168	1.07	0.0976108	0.752014	0.646091	0.98527
Q07157	Tight junction protein ZO-1 OS=Homo sapiens GN=TJP1 PE=1 SV=3	1.044	0.0621217	0.530779	1.07	0.0976108	0.752014	0.641397	0.963675
Q86WB0	Nuclear-interacting partner of ALK OS=Homo sapiens GN=ZC3HC1 PE=1 SV=1	1.042	0.0593553	0.511974	1.07	0.0976108	0.752014	0.631994	0.922719
Q01105	Protein SET OS=Homo sapiens GN=SET PE=1 SV=3	1.028	0.0398403	0.379311	1.07	0.0976108	0.752014	0.565663	0.693362
Q9UDY4	DnaJ homolog subfamily B member 4 OS=Homo sapiens GN=DNAJB4 PE=1 SV=1	1.045	0.0635029	0.540168	1.069	0.0962619	0.742965	0.641567	1.00091
Q96CT7	Coiled-coil domain-containing protein 124 OS=Homo sapiens GN=CCDC124 PE=1 SV=1	1.036	0.051024	0.455338	1.069	0.0962619	0.742965	0.599151	0.823995
P10155	60 kDa SS-A/Ro ribonucleoprotein OS=Homo sapiens GN=TROVE2 PE=1 SV=2	1.022	0.0313952	0.321901	1.069	0.0962619	0.742965	0.532433	0.6203
Q9UIF9	Bromodomain adjacent to zinc finger domain protein 2A OS=Homo sapiens GN=BAZ2A PE=1 SV=4	1.021	0.0299829	0.312301	1.069	0.0962619	0.742965	0.527633	0.607873
P11498	Pyruvate carboxylase, mitochondrial OS=Homo sapiens GN=PC PE=1 SV=2	1.007	0.0100637	0.176891	1.069	0.0962619	0.742965	0.459928	0.454447
Q9UKV8	Protein argonaute-2 OS=Homo sapiens GN=AGO2 PE=1 SV=3	1.005	0.0071955	0.157393	1.069	0.0962619	0.742965	0.450179	0.435215
Q9BTC0	Death-inducer obliterator 1 OS=Homo sapiens GN=DIDO1 PE=1 SV=5	0.999	-0.00144342	0.0986665	1.069	0.0962619	0.742965	0.420816	0.380961
P25686	DnaJ homolog subfamily B member 2 OS=Homo sapiens GN=DNAJB2 PE=1 SV=3	0.973	-0.0394883	-0.159961	1.069	0.0962619	0.742965	0.291502	0.197224
Q92626	Peroxidasin homolog OS=Homo sapiens GN=PXDN PE=1 SV=2	0.962	-0.0558912	-0.271467	1.069	0.0962619	0.742965	0.235749	0.140852
Q15070	Mitochondrial inner membrane protein OXA1L OS=Homo sapiens GN=OXA1L PE=1 SV=3	0.95	-0.0740006	-0.394574	1.069	0.0962619	0.742965	0.174196	0.091087
O14737	Programmed cell death protein 5 OS=Homo sapiens GN=PDCD5 PE=1 SV=3	0.935	-0.0969617	-0.550663	1.069	0.0962619	0.742965	0.0961512	0.0428468
O43924	Retinal rod rhodopsin-sensitive cGMP 3',5'-cyclic phosphodiesterase subunit delta OS=Homo sapiens GN=PDE6D PE=1 SV=1	1.139	0.187768	1.38492	1.068	0.0949116	0.733908	1.05941	0.721766
Q9Y281	Cofilin-2 OS=Homo sapiens GN=CFL2 PE=1 SV=1	1.11	0.15056	1.13198	1.068	0.0949116	0.733908	0.932942	0.873509
Q00613	Heat shock factor protein 1 OS=Homo sapiens GN=HSF1 PE=1 SV=1	1.084	0.116365	0.899521	1.068	0.0949116	0.733908	0.816714	1.19161
Q13823	Nucleolar GTP-binding protein 2 OS=Homo sapiens GN=GNL2 PE=1 SV=1	1.054	0.0758749	0.624273	1.068	0.0949116	0.733908	0.67909	1.29007
P61981	14-3-3 protein gamma OS=Homo sapiens GN=YWHAG PE=1 SV=2	1.036	0.051024	0.455338	1.068	0.0949116	0.733908	0.594623	0.834217
Q9UDY2	Tight junction protein ZO-2 OS=Homo sapiens GN=TJP2 PE=1 SV=2	1.035	0.0496308	0.445866	1.068	0.0949116	0.733908	0.589887	0.816877
Q8WYP5	Protein ELYS OS=Homo sapiens GN=AHCTF1 PE=1 SV=3	1.023	0.0328061	0.331493	1.068	0.0949116	0.733908	0.532701	0.638437
Q9Y2Q3	Glutathione S-transferase kappa 1 OS=Homo sapiens GN=GSTK1 PE=1 SV=3	1.012	0.0172093	0.225466	1.068	0.0949116	0.733908	0.479687	0.508291
Q69YN2	CWF19-like protein 1 OS=Homo sapiens GN=CWF19L1 PE=1 SV=2	1.007	0.0100637	0.176891	1.068	0.0949116	0.733908	0.455399	0.45664
P22694	cAMP-dependent protein kinase catalytic subunit beta OS=Homo sapiens GN=PRKACB PE=1 SV=2	1.007	0.0100637	0.176891	1.068	0.0949116	0.733908	0.455399	0.45664
Q00403	Transcription initiation factor IIB OS=Homo sapiens GN=GTF2B PE=1 SV=1	1.003	0.00432161	0.137857	1.068	0.0949116	0.733908	0.435882	0.41817
Q9H307	Pinin OS=Homo sapiens GN=PNN PE=1 SV=4	0.999	-0.00144342	0.0986665	1.068	0.0949116	0.733908	0.416287	0.382032
O43837	Isocitrate dehydrogenase [NAD] subunit beta, mitochondrial OS=Homo sapiens GN=IDH3B PE=1 SV=2	0.972	-0.0409718	-0.170046	1.068	0.0949116	0.733908	0.281931	0.190476
Q86VM9	Zinc finger CCCH domain-containing protein 18 OS=Homo sapiens GN=ZC3H18 PE=1 SV=2	0.958	-0.0619024	-0.312331	1.068	0.0949116	0.733908	0.210788	0.121393
Q9UPT5	Exocyst complex component 7 OS=Homo sapiens GN=EXOC7 PE=1 SV=3	0.911	-0.134477	-0.80569	1.068	0.0949116	0.733908	-0.035891	0.0130762
Q9Y399	28S ribosomal protein S2, mitochondrial OS=Homo sapiens GN=MRPS2 PE=1 SV=1	0.9	-0.152003	-0.924832	1.068	0.0949116	0.733908	-0.0954618	0.0328992
P11388	DNA topoisomerase 2-alpha OS=Homo sapiens GN=TOP2A PE=1 SV=3	1.079	0.109695	0.854179	1.067	0.0935602	0.724843	0.789511	1.28376
Q5TBB1	Ribonuclease H2 subunit B OS=Homo sapiens GN=RNASEH2B PE=1 SV=1	1.052	0.0731347	0.605645	1.067	0.0935602	0.724843	0.665244	1.24502
Q15843	NEDD8 OS=Homo sapiens GN=NEDD8 PE=1 SV=1	1.046	0.0648829	0.549549	1.067	0.0935602	0.724843	0.637196	1.06037
P31943	Heterogeneous nuclear ribonucleoprotein H OS=Homo sapiens GN=HNRNPH1 PE=1 SV=4	1.039	0.0551957	0.483696	1.067	0.0935602	0.724843	0.60427	0.901766
P31937	3-hydroxyisobutyrate dehydrogenase, mitochondrial OS=Homo sapiens GN=HIBADH PE=1 SV=2	0.99	-0.0144996	0.00991132	1.067	0.0935602	0.724843	0.367377	0.308657
P41240	Tyrosine-protein kinase CSK OS=Homo sapiens GN=CSK PE=1 SV=1	0.966	-0.0499049	-0.230772	1.067	0.0935602	0.724843	0.247035	0.157251
Q6P158	Putative ATP-dependent RNA helicase DHX57 OS=Homo sapiens GN=DHX57 PE=1 SV=2	0.939	-0.0908029	-0.508795	1.067	0.0935602	0.724843	0.108024	0.0507917
Q9H1Y0	Autophagy protein 5 OS=Homo sapiens GN=ATG5 PE=1 SV=2	0.894	-0.161653	-0.990433	1.067	0.0935602	0.724843	-0.132795	0.0446954
Q9UJS0	Calcium-binding mitochondrial carrier protein Aralar2 OS=Homo sapiens GN=SLC25A13 PE=1 SV=2	0.888	-0.171368	-1.05648	1.067	0.0935602	0.724843	-0.165816	0.0541276
O60675	Transcription factor MafK OS=Homo sapiens GN=MAFK PE=1 SV=1	1.149	0.200379	1.47064	1.066	0.0922074	0.715769	1.09321	0.674402
Q96MX6	WD repeat-containing protein 92 OS=Homo sapiens GN=WDR92 PE=1 SV=1	1.106	0.145351	1.09657	1.066	0.0922074	0.715769	0.90617	0.879933
Q8IY67	Ribonucleoprotein PTB-binding 1 OS=Homo sapiens GN=RAVER1 PE=1 SV=1	0.987	-0.018878	-0.0198533	1.066	0.0922074	0.715769	0.347958	0.285961
O43681	ATPase ASNA1 OS=Homo sapiens GN=ASNA1 PE=1 SV=2	0.922	-0.117161	-0.687979	1.066	0.0922074	0.715769	0.013895	0.00550755
P30825	High affinity cationic amino acid transporter 1 OS=Homo sapiens GN=SLC7A1 PE=1 SV=1	1.223	0.290424	2.08277	1.065	0.0908534	0.706687	1.39473	0.534983
P20042	Eukaryotic translation initiation factor 2 subunit 2 OS=Homo sapiens GN=EIF2S2 PE=1 SV=2	1.036	0.051024	0.455338	1.065	0.0908534	0.706687	0.581012	0.867697
Q99962	Endophilin-A1 OS=Homo sapiens GN=SH3GL2 PE=1 SV=1	1.165	0.22033	1.60627	1.064	0.0894982	0.697596	1.15193	0.621301
O14974	Protein phosphatase 1 regulatory subunit 12A OS=Homo sapiens GN=PPP1R12A PE=1 SV=1	1.154	0.206643	1.51323	1.064	0.0894982	0.697596	1.10541	0.647809
Q8IZH2	5'-3' exoribonuclease 1 OS=Homo sapiens GN=XRN1 PE=1 SV=1	1.131	0.177599	1.31579	1.064	0.0894982	0.697596	1.00669	0.722043
P26639	Threonine--tRNA ligase, cytoplasmic OS=Homo sapiens GN=TARS PE=1 SV=3	1.04	0.0565835	0.493131	1.064	0.0894982	0.697596	0.595363	0.965527
Q02790	Peptidyl-prolyl cis-trans isomerase FKBP4 OS=Homo sapiens GN=FKBP4 PE=1 SV=3	1.036	0.051024	0.455338	1.064	0.0894982	0.697596	0.576467	0.879918
Q8IYB3	Serine/arginine repetitive matrix protein 1 OS=Homo sapiens GN=SRRM1 PE=1 SV=2	1.001	0.00144197	0.118282	1.064	0.0894982	0.697596	0.407939	0.405525
Q13188	Serine/threonine-protein kinase 3 OS=Homo sapiens GN=STK3 PE=1 SV=2	0.995	-0.00723157	0.0593188	1.064	0.0894982	0.697596	0.378457	0.350669
Q15057	Arf-GAP with coiled-coil, ANK repeat and PH domain-containing protein 2 OS=Homo sapiens GN=ACAP2 PE=1 SV=3	0.95	-0.0740006	-0.394574	1.064	0.0894982	0.697596	0.151511	0.0821249
Q69YQ0	Cytospin-A OS=Homo sapiens GN=SPECC1L PE=1 SV=2	1.13	0.176323	1.30711	1.063	0.0881416	0.688496	0.997804	0.718137
Q53T59	HCLS1-binding protein 3 OS=Homo sapiens GN=HS1BP3 PE=1 SV=1	1.112	0.153157	1.14963	1.063	0.0881416	0.688496	0.919064	0.805539
Q7L0Y3	Mitochondrial ribonuclease P protein 1 OS=Homo sapiens GN=TRMT10C PE=1 SV=2	1.087	0.120352	0.926626	1.063	0.0881416	0.688496	0.807561	1.03063
O15446	DNA-directed RNA polymerase I subunit RPA34 OS=Homo sapiens GN=CD3EAP PE=1 SV=1	1.08	0.111031	0.863265	1.063	0.0881416	0.688496	0.77588	1.14631
Q7Z4V5	Hepatoma-derived growth factor-related protein 2 OS=Homo sapiens GN=HDGFRP2 PE=1 SV=1	1.021	0.0299829	0.312301	1.063	0.0881416	0.688496	0.500398	0.640354
Q53GS9	U4/U6.U5 tri-snRNP-associated protein 2 OS=Homo sapiens GN=USP39 PE=1 SV=2	1.005	0.0071955	0.157393	1.063	0.0881416	0.688496	0.422945	0.447424
Q9UK59	Lariat debranching enzyme OS=Homo sapiens GN=DBR1 PE=1 SV=2	0.987	-0.018878	-0.0198533	1.063	0.0881416	0.688496	0.334321	0.285375
P0CAP2	DNA-directed RNA polymerase II subunit GRINL1A OS=Homo sapiens GN=POLR2M PE=1 SV=1	0.981	-0.027675	-0.0796544	1.063	0.0881416	0.688496	0.304421	0.241598
P11047	Laminin subunit gamma-1 OS=Homo sapiens GN=LAMC1 PE=1 SV=3	0.98	-0.0291463	-0.0896567	1.063	0.0881416	0.688496	0.29942	0.234751
Q9NP66	High mobility group protein 20A OS=Homo sapiens GN=HMG20A PE=1 SV=1	0.941	-0.0877334	-0.487929	1.063	0.0881416	0.688496	0.100283	0.0493931
Q9UBP6	tRNA (guanine-N(7)-)-methyltransferase OS=Homo sapiens GN=METTL1 PE=1 SV=1	0.92	-0.120294	-0.709276	1.063	0.0881416	0.688496	-0.01039	0.00412958
Q70CQ2	Ubiquitin carboxyl-terminal hydrolase 34 OS=Homo sapiens GN=USP34 PE=1 SV=2	1.342	0.424385	2.99343	1.062	0.0867838	0.679388	1.83641	0.446215
Q9Y4R8	Telomere length regulation protein TEL2 homolog OS=Homo sapiens GN=TELO2 PE=1 SV=2	1.221	0.288063	2.06672	1.062	0.0867838	0.679388	1.37305	0.526061
Q9BQ39	ATP-dependent RNA helicase DDX50 OS=Homo sapiens GN=DDX50 PE=1 SV=1	1.141	0.190299	1.40212	1.062	0.0867838	0.679388	1.04075	0.672124
P27105	Erythrocyte band 7 integral membrane protein OS=Homo sapiens GN=STOM PE=1 SV=3	1.04	0.0565835	0.493131	1.062	0.0867838	0.679388	0.586259	0.998739
Q08499	cAMP-specific 3',5'-cyclic phosphodiesterase 4D OS=Homo sapiens GN=PDE4D PE=1 SV=2	1.03	0.0426443	0.398373	1.062	0.0867838	0.679388	0.538881	0.789475
Q9H3H3	UPF0696 protein C11orf68 OS=Homo sapiens GN=C11orf68 PE=1 SV=2	1.019	0.0271541	0.293071	1.062	0.0867838	0.679388	0.48623	0.618467
Q5VTR2	E3 ubiquitin-protein ligase BRE1A OS=Homo sapiens GN=RNF20 PE=1 SV=2	0.991	-0.013043	0.0198126	1.062	0.0867838	0.679388	0.349601	0.317458
Q9H3M7	Thioredoxin-interacting protein OS=Homo sapiens GN=TXNIP PE=1 SV=1	1.127	0.172488	1.28104	1.061	0.0854247	0.670271	0.975656	0.714184
Q96G46	tRNA-dihydrouridine(47) synthase [NAD(P)(+)]-like OS=Homo sapiens GN=DUS3L PE=1 SV=2	1.112	0.153157	1.14963	1.061	0.0854247	0.670271	0.909951	0.78526
Q14651	Plastin-1 OS=Homo sapiens GN=PLS1 PE=1 SV=2	1.104	0.14274	1.07882	1.061	0.0854247	0.670271	0.874545	0.835406
O60814	Histone H2B type 1-K OS=Homo sapiens GN=HIST1H2BK PE=1 SV=3	1.094	0.129613	0.98958	1.061	0.0854247	0.670271	0.829926	0.917252
P04406	Glyceraldehyde-3-phosphate dehydrogenase OS=Homo sapiens GN=GAPDH PE=1 SV=3	1.072	0.100305	0.790347	1.061	0.0854247	0.670271	0.730309	1.28218
P47985	Cytochrome b-c1 complex subunit Rieske, mitochondrial OS=Homo sapiens GN=UQCRFS1 PE=1 SV=2	1.045	0.0635029	0.540168	1.061	0.0854247	0.670271	0.60522	1.16644
Q15811	Intersectin-1 OS=Homo sapiens GN=ITSN1 PE=1 SV=3	1.039	0.0551957	0.483696	1.061	0.0854247	0.670271	0.576984	0.991202
Q14493	Histone RNA hairpin-binding protein OS=Homo sapiens GN=SLBP PE=1 SV=1	1.038	0.0538064	0.474252	1.061	0.0854247	0.670271	0.572262	0.96664
P54920	Alpha-soluble NSF attachment protein OS=Homo sapiens GN=NAPA PE=1 SV=3	0.99	-0.0144996	0.00991132	1.061	0.0854247	0.670271	0.340091	0.309284
Q8N884	Cyclic GMP-AMP synthase OS=Homo sapiens GN=MB21D1 PE=1 SV=2	1.17	0.226509	1.64827	1.06	0.0840643	0.661146	1.15471	0.589812
Q8N7H5	RNA polymerase II-associated factor 1 homolog OS=Homo sapiens GN=PAF1 PE=1 SV=2	1.126	0.171207	1.27234	1.06	0.0840643	0.661146	0.96674	0.710159
Q96A72	Protein mago nashi homolog 2 OS=Homo sapiens GN=MAGOHB PE=1 SV=1	1.106	0.145351	1.09657	1.06	0.0840643	0.661146	0.878858	0.810812
Q8TCS8	Polyribonucleotide nucleotidyltransferase 1, mitochondrial OS=Homo sapiens GN=PNPT1 PE=1 SV=2	1.086	0.119024	0.917599	1.06	0.0840643	0.661146	0.789372	0.989201
P27540	Aryl hydrocarbon receptor nuclear translocator OS=Homo sapiens GN=ARNT PE=1 SV=1	1.078	0.108357	0.845085	1.06	0.0840643	0.661146	0.753115	1.11148
Q99447	Ethanolamine-phosphate cytidylyltransferase OS=Homo sapiens GN=PCYT2 PE=1 SV=1	1.043	0.0607392	0.52138	1.06	0.0840643	0.661146	0.591263	1.12554
P30042	ES1 protein homolog, mitochondrial OS=Homo sapiens GN=C21orf33 PE=1 SV=3	1.043	0.0607392	0.52138	1.06	0.0840643	0.661146	0.591263	1.12554
Q6PID6	Tetratricopeptide repeat protein 33 OS=Homo sapiens GN=TTC33 PE=1 SV=2	1.002	0.00288251	0.128074	1.06	0.0840643	0.661146	0.39461	0.422294
Q6DKK2	Tetratricopeptide repeat protein 19, mitochondrial OS=Homo sapiens GN=TTC19 PE=1 SV=4	0.996	-0.00578235	0.0691704	1.06	0.0840643	0.661146	0.365158	0.362874
Q9UJX6	Anaphase-promoting complex subunit 2 OS=Homo sapiens GN=ANAPC2 PE=1 SV=1	0.939	-0.0908029	-0.508795	1.06	0.0840643	0.661146	0.0761751	0.0373641
O75400	Pre-mRNA-processing factor 40 homolog A OS=Homo sapiens GN=PRPF40A PE=1 SV=2	0.938	-0.0923402	-0.519245	1.06	0.0840643	0.661146	0.0709502	0.0344059
Q15022	Polycomb protein SUZ12 OS=Homo sapiens GN=SUZ12 PE=1 SV=3	1.17	0.226509	1.64827	1.059	0.0827026	0.652013	1.15014	0.584701
Q8N108	Mesoderm induction early response protein 1 OS=Homo sapiens GN=MIER1 PE=1 SV=2	1.046	0.0648829	0.549549	1.059	0.0827026	0.652013	0.600781	1.26635
Q9UGI8	Testin OS=Homo sapiens GN=TES PE=1 SV=1	1.041	0.0579701	0.502557	1.059	0.0827026	0.652013	0.577285	1.08643
Q13185	Chromobox protein homolog 3 OS=Homo sapiens GN=CBX3 PE=1 SV=4	1.039	0.0551957	0.483696	1.059	0.0827026	0.652013	0.567854	1.02841
O94760	N(G),N(G)-dimethylarginine dimethylaminohydrolase 1 OS=Homo sapiens GN=DDAH1 PE=1 SV=3	1.031	0.0440443	0.40789	1.059	0.0827026	0.652013	0.529951	0.841287
Q96CS3	FAS-associated factor 2 OS=Homo sapiens GN=FAF2 PE=1 SV=2	1.027	0.0384362	0.369766	1.059	0.0827026	0.652013	0.510889	0.765544
Q9H6R0	Putative ATP-dependent RNA helicase DHX33 OS=Homo sapiens GN=DHX33 PE=1 SV=2	1.006	0.00863031	0.167147	1.059	0.0827026	0.652013	0.40958	0.468216
Q14558	Phosphoribosyl pyrophosphate synthase-associated protein 1 OS=Homo sapiens GN=PRPSAP1 PE=1 SV=2	1.001	0.00144197	0.118282	1.059	0.0827026	0.652013	0.385147	0.41369
Q9UIV1	CCR4-NOT transcription complex subunit 7 OS=Homo sapiens GN=CNOT7 PE=1 SV=3	0.973	-0.0394883	-0.159961	1.059	0.0827026	0.652013	0.246026	0.184981
P68104	Elongation factor 1-alpha 1 OS=Homo sapiens GN=EEF1A1 PE=1 SV=1	1.116	0.158337	1.18485	1.058	0.0813396	0.64287	0.913858	0.736317
Q9ULT0	Tetratricopeptide repeat protein 7A OS=Homo sapiens GN=TTC7A PE=1 SV=3	1.094	0.129613	0.98958	1.058	0.0813396	0.64287	0.816225	0.875399
Q9Y2L1	Exosome complex exonuclease RRP44 OS=Homo sapiens GN=DIS3 PE=1 SV=2	1.042	0.0593553	0.511974	1.058	0.0813396	0.64287	0.577422	1.14357
O95671	N-acetylserotonin O-methyltransferase-like protein OS=Homo sapiens GN=ASMTL PE=1 SV=3	1.027	0.0384362	0.369766	1.058	0.0813396	0.64287	0.506318	0.775457
P20839	Inosine-5'-monophosphate dehydrogenase 1 OS=Homo sapiens GN=IMPDH1 PE=1 SV=2	0.994	-0.00868224	0.0494573	1.058	0.0813396	0.64287	0.346163	0.345708
O00422	Histone deacetylase complex subunit SAP18 OS=Homo sapiens GN=SAP18 PE=1 SV=1	0.985	-0.0218044	-0.0397463	1.058	0.0813396	0.64287	0.301562	0.268162
Q04837	Single-stranded DNA-binding protein, mitochondrial OS=Homo sapiens GN=SSBP1 PE=1 SV=1	1.208	0.27262	1.96174	1.057	0.0799754	0.633719	1.29773	0.521313
Q15427	Splicing factor 3B subunit 4 OS=Homo sapiens GN=SF3B4 PE=1 SV=1	1.104	0.14274	1.07882	1.057	0.0799754	0.633719	0.856269	0.790807
P18669	Phosphoglycerate mutase 1 OS=Homo sapiens GN=PGAM1 PE=1 SV=2	1.075	0.104337	0.817755	1.057	0.0799754	0.633719	0.725737	1.09534
Q8NB49	Phospholipid-transporting ATPase IG OS=Homo sapiens GN=ATP11C PE=1 SV=3	1.043	0.0607392	0.52138	1.057	0.0799754	0.633719	0.57755	1.20957
Q9Y4K0	Lysyl oxidase homolog 2 OS=Homo sapiens GN=LOXL2 PE=1 SV=1	1.038	0.0538064	0.474252	1.057	0.0799754	0.633719	0.553986	1.04095
Q8WWC4	Uncharacterized protein C2orf47, mitochondrial OS=Homo sapiens GN=C2orf47 PE=1 SV=1	1.035	0.0496308	0.445866	1.057	0.0799754	0.633719	0.539793	0.959885
Q96QK1	Vacuolar protein sorting-associated protein 35 OS=Homo sapiens GN=VPS35 PE=1 SV=2	1.033	0.0468403	0.426896	1.057	0.0799754	0.633719	0.530308	0.911496
Q9UJY1	Heat shock protein beta-8 OS=Homo sapiens GN=HSPB8 PE=1 SV=1	1.019	0.0271541	0.293071	1.057	0.0799754	0.633719	0.463395	0.649295
P51692	Signal transducer and activator of transcription 5B OS=Homo sapiens GN=STAT5B PE=1 SV=2	1.017	0.0243197	0.273802	1.057	0.0799754	0.633719	0.453761	0.619127
O75381	Peroxisomal membrane protein PEX14 OS=Homo sapiens GN=PEX14 PE=1 SV=1	1.015	0.0214797	0.254497	1.057	0.0799754	0.633719	0.444108	0.590255
P26583	High mobility group protein B2 OS=Homo sapiens GN=HMGB2 PE=1 SV=2	1.006	0.00863031	0.167147	1.057	0.0799754	0.633719	0.400433	0.473885
Q9NXA8	NAD-dependent protein deacylase sirtuin-5, mitochondrial OS=Homo sapiens GN=SIRT5 PE=1 SV=2	0.964	-0.0528949	-0.251099	1.057	0.0799754	0.633719	0.19131	0.130671
P37108	Signal recognition particle 14 kDa protein OS=Homo sapiens GN=SRP14 PE=1 SV=2	0.942	-0.086201	-0.477512	1.057	0.0799754	0.633719	0.0781034	0.0404376
Q86V21	Acetoacetyl-CoA synthetase OS=Homo sapiens GN=AACS PE=1 SV=1	1.037	0.0524159	0.464799	1.056	0.0786098	0.624559	0.544679	1.03291
Q14344	Guanine nucleotide-binding protein subunit alpha-13 OS=Homo sapiens GN=GNA13 PE=1 SV=2	1.02	0.0285692	0.30269	1.056	0.0786098	0.624559	0.463625	0.672232
Q9P1Y6	PHD and RING finger domain-containing protein 1 OS=Homo sapiens GN=PHRF1 PE=1 SV=3	1.008	0.0114956	0.186626	1.056	0.0786098	0.624559	0.405592	0.501487
Q9UKN8	General transcription factor 3C polypeptide 4 OS=Homo sapiens GN=GTF3C4 PE=1 SV=2	1.007	0.0100637	0.176891	1.056	0.0786098	0.624559	0.400725	0.48906
Q7Z5L9	Interferon regulatory factor 2-binding protein 2 OS=Homo sapiens GN=IRF2BP2 PE=1 SV=2	1.004	0.00575927	0.147629	1.056	0.0786098	0.624559	0.386094	0.453171
Q13616	Cullin-1 OS=Homo sapiens GN=CUL1 PE=1 SV=2	0.978	-0.0320936	-0.109693	1.056	0.0786098	0.624559	0.257433	0.214185
P86790	Vacuolar fusion protein CCZ1 homolog B OS=Homo sapiens GN=CCZ1B PE=1 SV=1	0.936	-0.0954196	-0.540179	1.056	0.0786098	0.624559	0.0421899	0.0204697
Q8IZP9	Adhesion G-protein coupled receptor G2 OS=Homo sapiens GN=ADGRG2 PE=1 SV=2	0.924	-0.114035	-0.666727	1.056	0.0786098	0.624559	-0.0210842	0.00912068
Q9BXB5	Oxysterol-binding protein-related protein 10 OS=Homo sapiens GN=OSBPL10 PE=1 SV=2	1.291	0.368489	2.61345	1.055	0.077243	0.61539	1.61442	0.4525
P40926	Malate dehydrogenase, mitochondrial OS=Homo sapiens GN=MDH2 PE=1 SV=3	1.119	0.16221	1.21117	1.055	0.077243	0.61539	0.913282	0.697401
Q9UM54	Unconventional myosin-VI OS=Homo sapiens GN=MYO6 PE=1 SV=4	1.103	0.141433	1.06993	1.055	0.077243	0.61539	0.842661	0.775441
Q9H788	SH2 domain-containing protein 4A OS=Homo sapiens GN=SH2D4A PE=1 SV=1	1.036	0.051024	0.455338	1.055	0.077243	0.61539	0.535364	1.02474
Q6PI48	Aspartate--tRNA ligase, mitochondrial OS=Homo sapiens GN=DARS2 PE=1 SV=1	1.025	0.0356239	0.350648	1.055	0.077243	0.61539	0.483019	0.768825
P49005	DNA polymerase delta subunit 2 OS=Homo sapiens GN=POLD2 PE=1 SV=1	1.019	0.0271541	0.293071	1.055	0.077243	0.61539	0.454231	0.66344
Q15645	Pachytene checkpoint protein 2 homolog OS=Homo sapiens GN=TRIP13 PE=1 SV=2	1.004	0.00575927	0.147629	1.055	0.077243	0.61539	0.38151	0.455795
Q8WTW3	Conserved oligomeric Golgi complex subunit 1 OS=Homo sapiens GN=COG1 PE=1 SV=1	0.966	-0.0499049	-0.230772	1.055	0.077243	0.61539	0.192309	0.137629
Q13895	Bystin OS=Homo sapiens GN=BYSL PE=1 SV=3	0.958	-0.0619024	-0.312331	1.055	0.077243	0.61539	0.151529	0.0974572
Q8NBN3	Transmembrane protein 87A OS=Homo sapiens GN=TMEM87A PE=1 SV=3	0.957	-0.0634092	-0.322574	1.055	0.077243	0.61539	0.146408	0.092932
O76076	WNT1-inducible-signaling pathway protein 2 OS=Homo sapiens GN=WISP2 PE=1 SV=1	1.138	0.186501	1.3763	1.054	0.0758749	0.606214	0.991257	0.62733
P13797	Plastin-3 OS=Homo sapiens GN=PLS3 PE=1 SV=4	1.082	0.1137	0.88141	1.054	0.0758749	0.606214	0.743812	0.933853
O15269	Serine palmitoyltransferase 1 OS=Homo sapiens GN=SPTLC1 PE=1 SV=1	1.039	0.0551957	0.483696	1.054	0.0758749	0.606214	0.544955	1.14713
Q13907	Isopentenyl-diphosphate Delta-isomerase 1 OS=Homo sapiens GN=IDI1 PE=1 SV=2	1.034	0.0482362	0.436386	1.054	0.0758749	0.606214	0.5213	0.988028
Q14141	Septin-6 OS=Homo sapiens GN=SEPT6 PE=1 SV=4	1.016	0.0229004	0.264155	1.054	0.0758749	0.606214	0.435184	0.622713
Q9HCS7	Pre-mRNA-splicing factor SYF1 OS=Homo sapiens GN=XAB2 PE=1 SV=2	1.007	0.0100637	0.176891	1.054	0.0758749	0.606214	0.391552	0.495862
Q96EY7	Pentatricopeptide repeat domain-containing protein 3, mitochondrial OS=Homo sapiens GN=PTCD3 PE=1 SV=3	1.005	0.0071955	0.157393	1.054	0.0758749	0.606214	0.381803	0.47072
P62158	Calmodulin OS=Homo sapiens GN=CALM1 PE=1 SV=2	1.003	0.00432161	0.137857	1.054	0.0758749	0.606214	0.372035	0.446542
Q13547	Histone deacetylase 1 OS=Homo sapiens GN=HDAC1 PE=1 SV=1	1	0	0.108479	1.054	0.0758749	0.606214	0.357346	0.411982
Q15459	Splicing factor 3A subunit 1 OS=Homo sapiens GN=SF3A1 PE=1 SV=1	0.994	-0.00868224	0.0494573	1.054	0.0758749	0.606214	0.327835	0.348551
P27797	Calreticulin OS=Homo sapiens GN=CALR PE=1 SV=1	0.985	-0.0218044	-0.0397463	1.054	0.0758749	0.606214	0.283234	0.266257
Q96CN9	GRIP and coiled-coil domain-containing protein 1 OS=Homo sapiens GN=GCC1 PE=1 SV=1	1.191	0.252173	1.82274	1.053	0.0745054	0.597027	1.20988	0.52507
Q9P270	SLAIN motif-containing protein 2 OS=Homo sapiens GN=SLAIN2 PE=1 SV=2	1.115	0.157044	1.17605	1.053	0.0745054	0.597027	0.886541	0.696918
Q9Y450	HBS1-like protein OS=Homo sapiens GN=HBS1L PE=1 SV=1	1.114	0.155749	1.16725	1.053	0.0745054	0.597027	0.882141	0.701119
Q9NR28	Diablo homolog, mitochondrial OS=Homo sapiens GN=DIABLO PE=1 SV=1	1.11	0.15056	1.13198	1.053	0.0745054	0.597027	0.864502	0.718918
Q9Y4P3	Transducin beta-like protein 2 OS=Homo sapiens GN=TBL2 PE=1 SV=1	1.094	0.129613	0.98958	1.053	0.0745054	0.597027	0.793304	0.811327
P16989	Y-box-binding protein 3 OS=Homo sapiens GN=YBX3 PE=1 SV=4	1.073	0.10165	0.799491	1.053	0.0745054	0.597027	0.698259	1.03784
P46199	Translation initiation factor IF-2, mitochondrial OS=Homo sapiens GN=MTIF2 PE=1 SV=2	1.065	0.0908534	0.726097	1.053	0.0745054	0.597027	0.661562	1.20827
Q9Y5X3	Sorting nexin-5 OS=Homo sapiens GN=SNX5 PE=1 SV=1	1.041	0.0579701	0.502557	1.053	0.0745054	0.597027	0.549792	1.26312
P42765	3-ketoacyl-CoA thiolase, mitochondrial OS=Homo sapiens GN=ACAA2 PE=1 SV=2	1.037	0.0524159	0.464799	1.053	0.0745054	0.597027	0.530913	1.10308
Q9HAU5	Regulator of nonsense transcripts 2 OS=Homo sapiens GN=UPF2 PE=1 SV=1	1.025	0.0356239	0.350648	1.053	0.0745054	0.597027	0.473838	0.790685
Q96JJ3	Engulfment and cell motility protein 2 OS=Homo sapiens GN=ELMO2 PE=1 SV=2	0.979	-0.0306192	-0.0996698	1.053	0.0745054	0.597027	0.248679	0.218023
Q9NW64	Pre-mRNA-splicing factor RBM22 OS=Homo sapiens GN=RBM22 PE=1 SV=1	1.142	0.191563	1.41071	1.052	0.0731347	0.587833	0.999273	0.604404
Q9UJX3	Anaphase-promoting complex subunit 7 OS=Homo sapiens GN=ANAPC7 PE=1 SV=4	1.104	0.14274	1.07882	1.052	0.0731347	0.587833	0.833326	0.73901
Q8IWB7	WD repeat and FYVE domain-containing protein 1 OS=Homo sapiens GN=WDFY1 PE=1 SV=1	1.065	0.0908534	0.726097	1.052	0.0731347	0.587833	0.656965	1.17558
P49720	Proteasome subunit beta type-3 OS=Homo sapiens GN=PSMB3 PE=1 SV=2	1.014	0.0200577	0.24483	1.052	0.0731347	0.587833	0.416332	0.604218
Q9Y3C6	Peptidyl-prolyl cis-trans isomerase-like 1 OS=Homo sapiens GN=PPIL1 PE=1 SV=1	0.993	-0.0101344	0.0395853	1.052	0.0731347	0.587833	0.313709	0.339899
Q8N0X7	Spartin OS=Homo sapiens GN=SPG20 PE=1 SV=1	0.955	-0.0664274	-0.343092	1.052	0.0731347	0.587833	0.122371	0.0776196
Q9H0H5	Rac GTPase-activating protein 1 OS=Homo sapiens GN=RACGAP1 PE=1 SV=1	1.103	0.141433	1.06993	1.051	0.0717627	0.57863	0.824281	0.734264
Q14432	cGMP-inhibited 3',5'-cyclic phosphodiesterase A OS=Homo sapiens GN=PDE3A PE=1 SV=3	1.02	0.0285692	0.30269	1.051	0.0717627	0.57863	0.44066	0.714062
Q9GZL7	Ribosome biogenesis protein WDR12 OS=Homo sapiens GN=WDR12 PE=1 SV=2	1.013	0.0186342	0.235153	1.051	0.0717627	0.57863	0.406891	0.594723
Q01804	OTU domain-containing protein 4 OS=Homo sapiens GN=OTUD4 PE=1 SV=4	1.002	0.00288251	0.128074	1.051	0.0717627	0.57863	0.353352	0.4421
Q14669	E3 ubiquitin-protein ligase TRIP12 OS=Homo sapiens GN=TRIP12 PE=1 SV=1	0.919	-0.121863	-0.719942	1.051	0.0717627	0.57863	-0.070656	0.0310532
Q53HL2	Borealin OS=Homo sapiens GN=CDCA8 PE=1 SV=2	1.166	0.221568	1.61469	1.05	0.0703893	0.569417	1.09205	0.546429
Q9ULT8	E3 ubiquitin-protein ligase HECTD1 OS=Homo sapiens GN=HECTD1 PE=1 SV=3	1.122	0.166073	1.23743	1.05	0.0703893	0.569417	0.903425	0.64696
Q9BRX2	Protein pelota homolog OS=Homo sapiens GN=PELO PE=1 SV=2	1.118	0.16092	1.20241	1.05	0.0703893	0.569417	0.885912	0.660672
Q969S3	Zinc finger protein 622 OS=Homo sapiens GN=ZNF622 PE=1 SV=1	1.083	0.115033	0.890469	1.05	0.0703893	0.569417	0.729943	0.860723
O75822	Eukaryotic translation initiation factor 3 subunit J OS=Homo sapiens GN=EIF3J PE=1 SV=2	1.063	0.0881416	0.707661	1.05	0.0703893	0.569417	0.638539	1.16338
Q92598	Heat shock protein 105 kDa OS=Homo sapiens GN=HSPH1 PE=1 SV=1	1.024	0.0342157	0.341076	1.05	0.0703893	0.569417	0.455247	0.805678
Q8WTT2	Nucleolar complex protein 3 homolog OS=Homo sapiens GN=NOC3L PE=1 SV=1	1.006	0.00863031	0.167147	1.05	0.0703893	0.569417	0.368282	0.497257
Q9BRZ2	E3 ubiquitin-protein ligase TRIM56 OS=Homo sapiens GN=TRIM56 PE=1 SV=3	0.983	-0.0247367	-0.0596804	1.05	0.0703893	0.569417	0.254868	0.246815
Q09472	Histone acetyltransferase p300 OS=Homo sapiens GN=EP300 PE=1 SV=2	0.945	-0.0816138	-0.446328	1.05	0.0703893	0.569417	0.0615445	0.034691
Q9NPF0	CD320 antigen OS=Homo sapiens GN=CD320 PE=1 SV=1	0.864	-0.210897	-1.32519	1.05	0.0703893	0.569417	-0.377885	0.120123
Q9Y6N5	Sulfide:quinone oxidoreductase, mitochondrial OS=Homo sapiens GN=SQRDL PE=1 SV=1	1.133	0.180148	1.33312	1.049	0.0690147	0.560197	0.946656	0.607751
Q9Y608	Leucine-rich repeat flightless-interacting protein 2 OS=Homo sapiens GN=LRRFIP2 PE=1 SV=1	1.133	0.180148	1.33312	1.049	0.0690147	0.560197	0.946656	0.607751
P11233	Ras-related protein Ral-A OS=Homo sapiens GN=RALA PE=1 SV=1	1.086	0.119024	0.917599	1.049	0.0690147	0.560197	0.738898	0.820838
Q8NBI5	Solute carrier family 43 member 3 OS=Homo sapiens GN=SLC43A3 PE=1 SV=2	1.013	0.0186342	0.235153	1.049	0.0690147	0.560197	0.397675	0.607325
Q8NFW8	N-acylneuraminate cytidylyltransferase OS=Homo sapiens GN=CMAS PE=1 SV=2	0.983	-0.0247367	-0.0596804	1.049	0.0690147	0.560197	0.250258	0.245983
Q9NVD7	Alpha-parvin OS=Homo sapiens GN=PARVA PE=1 SV=1	0.96	-0.0588937	-0.291878	1.049	0.0690147	0.560197	0.134159	0.0937801
Q15906	Vacuolar protein sorting-associated protein 72 homolog OS=Homo sapiens GN=VPS72 PE=1 SV=1	0.952	-0.0709665	-0.373948	1.049	0.0690147	0.560197	0.0931243	0.0581337
Q9C0B0	RING finger protein unkempt homolog OS=Homo sapiens GN=UNK PE=1 SV=2	0.942	-0.086201	-0.477512	1.049	0.0690147	0.560197	0.0413423	0.0225594
Q15058	Kinesin-like protein KIF14 OS=Homo sapiens GN=KIF14 PE=1 SV=1	0.924	-0.114035	-0.666727	1.049	0.0690147	0.560197	-0.0532653	0.0246315
Q00577	Transcriptional activator protein Pur-alpha OS=Homo sapiens GN=PURA PE=1 SV=2	0.921	-0.118727	-0.698622	1.049	0.0690147	0.560197	-0.0692123	0.0313887
Q9C0J8	pre-mRNA 3' end processing protein WDR33 OS=Homo sapiens GN=WDR33 PE=1 SV=2	1.135	0.182692	1.35041	1.048	0.0676387	0.550967	0.95069	0.59622
O43819	Protein SCO2 homolog, mitochondrial OS=Homo sapiens GN=SCO2 PE=1 SV=3	1.092	0.126973	0.971634	1.048	0.0676387	0.550967	0.761301	0.765468
P49588	Alanine--tRNA ligase, cytoplasmic OS=Homo sapiens GN=AARS PE=1 SV=2	1.089	0.123004	0.944654	1.048	0.0676387	0.550967	0.74781	0.785532
Q5T1M5	FK506-binding protein 15 OS=Homo sapiens GN=FKBP15 PE=1 SV=2	1.03	0.0426443	0.398373	1.048	0.0676387	0.550967	0.47467	0.993702
Q63ZY3	KN motif and ankyrin repeat domain-containing protein 2 OS=Homo sapiens GN=KANK2 PE=1 SV=1	1.029	0.041243	0.388847	1.048	0.0676387	0.550967	0.469907	0.963579
P23786	Carnitine O-palmitoyltransferase 2, mitochondrial OS=Homo sapiens GN=CPT2 PE=1 SV=2	1.026	0.0370307	0.360212	1.048	0.0676387	0.550967	0.455589	0.881475
Q14839	Chromodomain-helicase-DNA-binding protein 4 OS=Homo sapiens GN=CHD4 PE=1 SV=2	1.015	0.0214797	0.254497	1.048	0.0676387	0.550967	0.402732	0.648733
Q96E11	Ribosome-recycling factor, mitochondrial OS=Homo sapiens GN=MRRF PE=1 SV=1	1.011	0.015783	0.215771	1.048	0.0676387	0.550967	0.383369	0.581081
Q7Z2Z2	Elongation factor-like GTPase 1 OS=Homo sapiens GN=EFL1 PE=1 SV=2	1.007	0.0100637	0.176891	1.048	0.0676387	0.550967	0.363929	0.519666
O95630	STAM-binding protein OS=Homo sapiens GN=STAMBP PE=1 SV=1	1.001	0.00144197	0.118282	1.048	0.0676387	0.550967	0.334624	0.437263
Q9UNL2	Translocon-associated protein subunit gamma OS=Homo sapiens GN=SSR3 PE=1 SV=1	0.981	-0.027675	-0.0796544	1.048	0.0676387	0.550967	0.235656	0.228116
Q96S52	GPI transamidase component PIG-S OS=Homo sapiens GN=PIGS PE=1 SV=3	0.965	-0.0513992	-0.240931	1.048	0.0676387	0.550967	0.155018	0.117797
P25445	Tumor necrosis factor receptor superfamily member 6 OS=Homo sapiens GN=FAS PE=1 SV=1	0.956	-0.0649175	-0.332828	1.048	0.0676387	0.550967	0.10907	0.0726564
Q5T9L3	Protein wntless homolog OS=Homo sapiens GN=WLS PE=1 SV=2	0.924	-0.114035	-0.666727	1.048	0.0676387	0.550967	-0.0578803	0.0270289
Q96EK4	THAP domain-containing protein 11 OS=Homo sapiens GN=THAP11 PE=1 SV=2	0.888	-0.171368	-1.05648	1.048	0.0676387	0.550967	-0.252755	0.093649
Q14019	Coactosin-like protein OS=Homo sapiens GN=COTL1 PE=1 SV=3	1.085	0.117695	0.908564	1.047	0.0662614	0.541729	0.725147	0.802119
Q16186	Proteasomal ubiquitin receptor ADRM1 OS=Homo sapiens GN=ADRM1 PE=1 SV=2	1.021	0.0299829	0.312301	1.047	0.0662614	0.541729	0.427015	0.777081
Q9UIQ6	Leucyl-cystinyl aminopeptidase OS=Homo sapiens GN=LNPEP PE=1 SV=3	1.018	0.0257376	0.283441	1.047	0.0662614	0.541729	0.412585	0.714175
O60826	Coiled-coil domain-containing protein 22 OS=Homo sapiens GN=CCDC22 PE=1 SV=1	0.975	-0.0365259	-0.139822	1.047	0.0662614	0.541729	0.200953	0.179927
Q9BVK6	Transmembrane emp24 domain-containing protein 9 OS=Homo sapiens GN=TMED9 PE=1 SV=2	0.948	-0.077041	-0.415243	1.047	0.0662614	0.541729	0.0632432	0.0379431
Q9NPI6	mRNA-decapping enzyme 1A OS=Homo sapiens GN=DCP1A PE=1 SV=2	0.945	-0.0816138	-0.446328	1.047	0.0662614	0.541729	0.0477004	0.0274631
Q9ULC4	Malignant T-cell-amplified sequence 1 OS=Homo sapiens GN=MCTS1 PE=1 SV=1	0.876	-0.190997	-1.18991	1.047	0.0662614	0.541729	-0.324091	0.112394
Q8NB90	Spermatogenesis-associated protein 5 OS=Homo sapiens GN=SPATA5 PE=1 SV=3	1.106	0.145351	1.09657	1.046	0.0648829	0.532481	0.814526	0.673224
P16333	Cytoplasmic protein NCK1 OS=Homo sapiens GN=NCK1 PE=1 SV=1	1.079	0.109695	0.854179	1.046	0.0648829	0.532481	0.69333	0.838257
Q13555	Calcium/calmodulin-dependent protein kinase type II subunit gamma OS=Homo sapiens GN=CAMK2G PE=1 SV=3	1.072	0.100305	0.790347	1.046	0.0648829	0.532481	0.661414	0.911642
Q07866	Kinesin light chain 1 OS=Homo sapiens GN=KLC1 PE=1 SV=2	1.029	0.041243	0.388847	1.046	0.0648829	0.532481	0.460664	1.00676
O60678	Protein arginine N-methyltransferase 3 OS=Homo sapiens GN=PRMT3 PE=1 SV=3	1.012	0.0172093	0.225466	1.046	0.0648829	0.532481	0.378974	0.610815
Q5VTL8	Pre-mRNA-splicing factor 38B OS=Homo sapiens GN=PRPF38B PE=1 SV=1	0.999	-0.00144342	0.0986665	1.046	0.0648829	0.532481	0.315574	0.416393
P17050	Alpha-N-acetylgalactosaminidase OS=Homo sapiens GN=NAGA PE=1 SV=2	0.995	-0.00723157	0.0593188	1.046	0.0648829	0.532481	0.2959	0.367167
P40937	Replication factor C subunit 5 OS=Homo sapiens GN=RFC5 PE=1 SV=1	0.988	-0.0174171	-0.00992193	1.046	0.0648829	0.532481	0.26128	0.290848
P61764	Syntaxin-binding protein 1 OS=Homo sapiens GN=STXBP1 PE=1 SV=1	0.913	-0.131313	-0.784183	1.046	0.0648829	0.532481	-0.125851	0.0556404
P48506	Glutamate--cysteine ligase catalytic subunit OS=Homo sapiens GN=GCLC PE=1 SV=2	0.803	-0.316528	-2.04327	1.046	0.0648829	0.532481	-0.755392	0.178948
P24534	Elongation factor 1-beta OS=Homo sapiens GN=EEF1B2 PE=1 SV=3	1.184	0.243669	1.76493	1.045	0.0635029	0.523225	1.14408	0.499593
P42566	Epidermal growth factor receptor substrate 15 OS=Homo sapiens GN=EPS15 PE=1 SV=2	1.113	0.154454	1.15845	1.045	0.0635029	0.523225	0.840836	0.638415
Q14807	Kinesin-like protein KIF22 OS=Homo sapiens GN=KIF22 PE=1 SV=5	1.075	0.104337	0.817755	1.045	0.0635029	0.523225	0.67049	0.861254
Q14690	Protein RRP5 homolog OS=Homo sapiens GN=PDCD11 PE=1 SV=3	1.064	0.0894982	0.716883	1.045	0.0635029	0.523225	0.620054	1.00604
Q9Y232	Chromodomain Y-like protein OS=Homo sapiens GN=CDYL PE=1 SV=2	0.98	-0.0291463	-0.0896567	1.045	0.0635029	0.523225	0.216784	0.216069
Q8N3D4	EH domain-binding protein 1-like protein 1 OS=Homo sapiens GN=EHBP1L1 PE=1 SV=2	0.975	-0.0365259	-0.139822	1.045	0.0635029	0.523225	0.191701	0.176369
Q9NZJ5	Eukaryotic translation initiation factor 2-alpha kinase 3 OS=Homo sapiens GN=EIF2AK3 PE=1 SV=3	0.871	-0.199255	-1.24605	1.045	0.0635029	0.523225	-0.361413	0.123155
Q5JTJ3	Cytochrome c oxidase assembly factor 6 homolog OS=Homo sapiens GN=COA6 PE=1 SV=1	1.074	0.102994	0.808627	1.044	0.0621217	0.51396	0.661294	0.855249
Q9NRW7	Vacuolar protein sorting-associated protein 45 OS=Homo sapiens GN=VPS45 PE=1 SV=1	1.056	0.0786098	0.642865	1.044	0.0621217	0.51396	0.578412	1.15091
Q96ER9	Coiled-coil domain-containing protein 51 OS=Homo sapiens GN=CCDC51 PE=1 SV=2	1.008	0.0114956	0.186626	1.044	0.0621217	0.51396	0.350293	0.555549
P11216	Glycogen phosphorylase, brain form OS=Homo sapiens GN=PYGB PE=1 SV=5	0.955	-0.0664274	-0.343092	1.044	0.0621217	0.51396	0.0854343	0.0581304
Q15269	Periodic tryptophan protein 2 homolog OS=Homo sapiens GN=PWP2 PE=2 SV=2	1.157	0.210389	1.53869	1.043	0.0607392	0.504686	1.02169	0.525449
P25787	Proteasome subunit alpha type-2 OS=Homo sapiens GN=PSMA2 PE=1 SV=2	1.131	0.177599	1.31579	1.043	0.0607392	0.504686	0.910237	0.573758
Q9UBT2	SUMO-activating enzyme subunit 2 OS=Homo sapiens GN=UBA2 PE=1 SV=2	1.093	0.128293	0.980612	1.043	0.0607392	0.504686	0.742649	0.704635
Q13042	Cell division cycle protein 16 homolog OS=Homo sapiens GN=CDC16 PE=1 SV=2	1.031	0.0440443	0.40789	1.043	0.0607392	0.504686	0.456288	1.17215
Q96T23	Remodeling and spacing factor 1 OS=Homo sapiens GN=RSF1 PE=1 SV=2	1.016	0.0229004	0.264155	1.043	0.0607392	0.504686	0.38442	0.714387
Q96BW5	Phosphotriesterase-related protein OS=Homo sapiens GN=PTER PE=1 SV=1	1.004	0.00575927	0.147629	1.043	0.0607392	0.504686	0.326158	0.496438
P12235	ADP/ATP translocase 1 OS=Homo sapiens GN=SLC25A4 PE=1 SV=4	1.004	0.00575927	0.147629	1.043	0.0607392	0.504686	0.326158	0.496438
Q9BVJ6	U3 small nucleolar RNA-associated protein 14 homolog A OS=Homo sapiens GN=UTP14A PE=1 SV=1	0.997	-0.00433459	0.0790121	1.043	0.0607392	0.504686	0.291849	0.396709
Q9UMY1	Nucleolar protein 7 OS=Homo sapiens GN=NOL7 PE=1 SV=2	0.977	-0.0335695	-0.119726	1.043	0.0607392	0.504686	0.19248	0.188235
Q99575	Ribonucleases P/MRP protein subunit POP1 OS=Homo sapiens GN=POP1 PE=1 SV=2	0.963	-0.0543923	-0.261278	1.043	0.0607392	0.504686	0.121704	0.0946794
Q5SRE5	Nucleoporin NUP188 homolog OS=Homo sapiens GN=NUP188 PE=1 SV=1	1.148	0.199123	1.46211	1.042	0.0593553	0.495404	0.978755	0.534582
Q7Z478	ATP-dependent RNA helicase DHX29 OS=Homo sapiens GN=DHX29 PE=1 SV=2	1.062	0.0867838	0.698431	1.042	0.0593553	0.495404	0.596917	0.969645
P22626	Heterogeneous nuclear ribonucleoproteins A2/B1 OS=Homo sapiens GN=HNRNPA2B1 PE=1 SV=2	1.024	0.0342157	0.341076	1.042	0.0593553	0.495404	0.41824	0.934987
Q01082	Spectrin beta chain, non-erythrocytic 1 OS=Homo sapiens GN=SPTBN1 PE=1 SV=2	1.023	0.0328061	0.331493	1.042	0.0593553	0.495404	0.413449	0.904558
P54819	Adenylate kinase 2, mitochondrial OS=Homo sapiens GN=AK2 PE=1 SV=2	1.022	0.0313952	0.321901	1.042	0.0593553	0.495404	0.408653	0.875598
Q9NZM1	Myoferlin OS=Homo sapiens GN=MYOF PE=1 SV=1	1.019	0.0271541	0.293071	1.042	0.0593553	0.495404	0.394238	0.796113
Q9NU22	Midasin OS=Homo sapiens GN=MDN1 PE=1 SV=2	1.017	0.0243197	0.273802	1.042	0.0593553	0.495404	0.384603	0.748193
Q5R3I4	Tetratricopeptide repeat protein 38 OS=Homo sapiens GN=TTC38 PE=1 SV=1	1.007	0.0100637	0.176891	1.042	0.0593553	0.495404	0.336147	0.550261
Q86XZ4	Spermatogenesis-associated serine-rich protein 2 OS=Homo sapiens GN=SPATS2 PE=1 SV=1	1.003	0.00432161	0.137857	1.042	0.0593553	0.495404	0.31663	0.485163
O43660	Pleiotropic regulator 1 OS=Homo sapiens GN=PLRG1 PE=1 SV=1	0.996	-0.00578235	0.0691704	1.042	0.0593553	0.495404	0.282287	0.385437
O76003	Glutaredoxin-3 OS=Homo sapiens GN=GLRX3 PE=1 SV=2	0.994	-0.00868224	0.0494573	1.042	0.0593553	0.495404	0.272431	0.359862
Q9H3K2	Growth hormone-inducible transmembrane protein OS=Homo sapiens GN=GHITM PE=1 SV=2	0.969	-0.0454314	-0.200362	1.042	0.0593553	0.495404	0.147521	0.128035
Q9Y2T2	AP-3 complex subunit mu-1 OS=Homo sapiens GN=AP3M1 PE=1 SV=1	0.969	-0.0454314	-0.200362	1.042	0.0593553	0.495404	0.147521	0.128035
P51003	Poly(A) polymerase alpha OS=Homo sapiens GN=PAPOLA PE=1 SV=4	0.916	-0.12658	-0.75201	1.042	0.0593553	0.495404	-0.128303	0.0600604
Q96GG9	DCN1-like protein 1 OS=Homo sapiens GN=DCUN1D1 PE=1 SV=1	1.138	0.186501	1.3763	1.041	0.0579701	0.486112	0.931206	0.546908
Q8N357	Solute carrier family 35 member F6 OS=Homo sapiens GN=SLC35F6 PE=1 SV=1	1.131	0.177599	1.31579	1.041	0.0579701	0.486112	0.90095	0.561133
Q8IUD2	ELKS/Rab6-interacting/CAST family member 1 OS=Homo sapiens GN=ERC1 PE=1 SV=1	1.098	0.134878	1.02537	1.041	0.0579701	0.486112	0.755743	0.661207
Q86W92	Liprin-beta-1 OS=Homo sapiens GN=PPFIBP1 PE=1 SV=2	1.056	0.0786098	0.642865	1.041	0.0579701	0.486112	0.564488	1.05636
Q8N9N7	Leucine-rich repeat-containing protein 57 OS=Homo sapiens GN=LRRC57 PE=1 SV=1	1.031	0.0440443	0.40789	1.041	0.0579701	0.486112	0.447001	1.25524
Q9H2G2	STE20-like serine/threonine-protein kinase OS=Homo sapiens GN=SLK PE=1 SV=1	1.028	0.0398403	0.379311	1.041	0.0579701	0.486112	0.432711	1.10696
Q9NY12	H/ACA ribonucleoprotein complex subunit 1 OS=Homo sapiens GN=GAR1 PE=1 SV=1	1.027	0.0384362	0.369766	1.041	0.0579701	0.486112	0.427939	1.06543
A1X283	SH3 and PX domain-containing protein 2B OS=Homo sapiens GN=SH3PXD2B PE=1 SV=3	1.026	0.0370307	0.360212	1.041	0.0579701	0.486112	0.423162	1.02681
Q99661	Kinesin-like protein KIF2C OS=Homo sapiens GN=KIF2C PE=1 SV=2	1.004	0.00575927	0.147629	1.041	0.0579701	0.486112	0.316871	0.505432
Q15181	Inorganic pyrophosphatase OS=Homo sapiens GN=PPA1 PE=1 SV=2	1	0	0.108479	1.041	0.0579701	0.486112	0.297295	0.443426
O15305	Phosphomannomutase 2 OS=Homo sapiens GN=PMM2 PE=1 SV=1	0.993	-0.0101344	0.0395853	1.041	0.0579701	0.486112	0.262849	0.348458
O75439	Mitochondrial-processing peptidase subunit beta OS=Homo sapiens GN=PMPCB PE=1 SV=2	0.968	-0.046921	-0.210489	1.041	0.0579701	0.486112	0.137812	0.119105
O43390	Heterogeneous nuclear ribonucleoprotein R OS=Homo sapiens GN=HNRNPR PE=1 SV=1	0.967	-0.0484122	-0.220625	1.041	0.0579701	0.486112	0.132743	0.112813
Q96QR8	Transcriptional activator protein Pur-beta OS=Homo sapiens GN=PURB PE=1 SV=3	0.954	-0.0679388	-0.353366	1.041	0.0579701	0.486112	0.0663726	0.0456807
Q9H9J2	39S ribosomal protein L44, mitochondrial OS=Homo sapiens GN=MRPL44 PE=1 SV=1	0.924	-0.114035	-0.666727	1.041	0.0579701	0.486112	-0.0903078	0.045244
Q9P2D3	HEAT repeat-containing protein 5B OS=Homo sapiens GN=HEATR5B PE=1 SV=2	1.108	0.147958	1.11429	1.04	0.0565835	0.476811	0.79555	0.615116
P07951	Tropomyosin beta chain OS=Homo sapiens GN=TPM2 PE=1 SV=1	1.105	0.144046	1.0877	1.04	0.0565835	0.476811	0.782255	0.625272
Q6UB35	Monofunctional C1-tetrahydrofolate synthase, mitochondrial OS=Homo sapiens GN=MTHFD1L PE=1 SV=1	1.079	0.109695	0.854179	1.04	0.0565835	0.476811	0.665495	0.754779
P49589	Cysteine--tRNA ligase, cytoplasmic OS=Homo sapiens GN=CARS PE=1 SV=3	1.052	0.0731347	0.605645	1.04	0.0565835	0.476811	0.541228	1.12254
P61163	Alpha-centractin OS=Homo sapiens GN=ACTR1A PE=1 SV=1	1.052	0.0731347	0.605645	1.04	0.0565835	0.476811	0.541228	1.12254
Q16832	Discoidin domain-containing receptor 2 OS=Homo sapiens GN=DDR2 PE=1 SV=2	0.943	-0.0846703	-0.467106	1.04	0.0565835	0.476811	0.00485224	0.00285176
Q92576	PHD finger protein 3 OS=Homo sapiens GN=PHF3 PE=1 SV=3	0.938	-0.0923402	-0.519245	1.04	0.0565835	0.476811	-0.0212173	0.0119342
P06396	Gelsolin OS=Homo sapiens GN=GSN PE=1 SV=1	0.924	-0.114035	-0.666727	1.04	0.0565835	0.476811	-0.0949584	0.0480665
Q92547	DNA topoisomerase 2-binding protein 1 OS=Homo sapiens GN=TOPBP1 PE=1 SV=3	1.12	0.163499	1.21994	1.039	0.0551957	0.467502	0.843719	0.573448
Q96C36	Pyrroline-5-carboxylate reductase 2 OS=Homo sapiens GN=PYCR2 PE=1 SV=1	1.069	0.0962619	0.762862	1.039	0.0551957	0.467502	0.615182	0.823942
P11166	Solute carrier family 2, facilitated glucose transporter member 1 OS=Homo sapiens GN=SLC2A1 PE=1 SV=2	1.056	0.0786098	0.642865	1.039	0.0551957	0.467502	0.555183	1.00122
O95834	Echinoderm microtubule-associated protein-like 2 OS=Homo sapiens GN=EML2 PE=1 SV=1	1.047	0.0662614	0.558921	1.039	0.0551957	0.467502	0.513212	1.24755
Q8IZ73	RNA pseudouridylate synthase domain-containing protein 2 OS=Homo sapiens GN=RPUSD2 PE=1 SV=2	0.938	-0.0923402	-0.519245	1.039	0.0551957	0.467502	-0.0258718	0.014732
Q14257	Reticulocalbin-2 OS=Homo sapiens GN=RCN2 PE=1 SV=1	0.877	-0.189351	-1.17872	1.039	0.0551957	0.467502	-0.355611	0.130546
P49411	Elongation factor Tu, mitochondrial OS=Homo sapiens GN=TUFM PE=1 SV=2	1.053	0.0745054	0.614963	1.038	0.0538064	0.458183	0.536573	1.03455
P55809	Succinyl-CoA:3-ketoacid coenzyme A transferase 1, mitochondrial OS=Homo sapiens GN=OXCT1 PE=1 SV=1	1.051	0.0717627	0.596318	1.038	0.0538064	0.458183	0.52725	1.08133
P63151	Serine/threonine-protein phosphatase 2A 55 kDa regulatory subunit B alpha isoform OS=Homo sapiens GN=PPP2R2A PE=1 SV=1	1.045	0.0635029	0.540168	1.038	0.0538064	0.458183	0.499176	1.28264
Q9C0B5	Palmitoyltransferase ZDHHC5 OS=Homo sapiens GN=ZDHHC5 PE=1 SV=2	1.028	0.0398403	0.379311	1.038	0.0538064	0.458183	0.418747	1.22346
Q9UL25	Ras-related protein Rab-21 OS=Homo sapiens GN=RAB21 PE=1 SV=3	1.012	0.0172093	0.225466	1.038	0.0538064	0.458183	0.341825	0.680113
Q6P1M0	Long-chain fatty acid transport protein 4 OS=Homo sapiens GN=SLC27A4 PE=1 SV=1	0.96	-0.0588937	-0.291878	1.038	0.0538064	0.458183	0.0831523	0.064949
Q9HCG8	Pre-mRNA-splicing factor CWC22 homolog OS=Homo sapiens GN=CWC22 PE=1 SV=3	1.076	0.105678	0.826873	1.037	0.0524159	0.448855	0.637864	0.736617
Q9UKF6	Cleavage and polyadenylation specificity factor subunit 3 OS=Homo sapiens GN=CPSF3 PE=1 SV=1	1.027	0.0384362	0.369766	1.037	0.0524159	0.448855	0.40931	1.21243
Q9Y276	Mitochondrial chaperone BCS1 OS=Homo sapiens GN=BCS1L PE=1 SV=1	1.008	0.0114956	0.186626	1.037	0.0524159	0.448855	0.31774	0.603542
Q01780	Exosome component 10 OS=Homo sapiens GN=EXOSC10 PE=1 SV=2	1.004	0.00575927	0.147629	1.037	0.0524159	0.448855	0.298242	0.526207
Q6XZF7	Dynamin-binding protein OS=Homo sapiens GN=DNMBP PE=1 SV=1	0.996	-0.00578235	0.0691704	1.037	0.0524159	0.448855	0.259013	0.395062
P50542	Peroxisomal targeting signal 1 receptor OS=Homo sapiens GN=PEX5 PE=1 SV=3	0.988	-0.0174171	-0.00992193	1.037	0.0524159	0.448855	0.219466	0.288978
Q14914	Prostaglandin reductase 1 OS=Homo sapiens GN=PTGR1 PE=1 SV=2	0.984	-0.0232698	-0.049708	1.037	0.0524159	0.448855	0.199573	0.243961
Q96G21	U3 small nucleolar ribonucleoprotein protein IMP4 OS=Homo sapiens GN=IMP4 PE=1 SV=1	0.982	-0.0262051	-0.0696623	1.037	0.0524159	0.448855	0.189596	0.223283
P16220	Cyclic AMP-responsive element-binding protein 1 OS=Homo sapiens GN=CREB1 PE=1 SV=2	0.978	-0.0320936	-0.109693	1.037	0.0524159	0.448855	0.169581	0.185361
Q9Y6Y8	SEC23-interacting protein OS=Homo sapiens GN=SEC23IP PE=1 SV=1	0.974	-0.0380063	-0.149887	1.037	0.0524159	0.448855	0.149484	0.151703
Q6P1R4	tRNA-dihydrouridine(16/17) synthase [NAD(P)(+)]-like OS=Homo sapiens GN=DUS1L PE=1 SV=1	0.949	-0.07552	-0.404903	1.037	0.0524159	0.448855	0.0219759	0.0144588
O75122	CLIP-associating protein 2 OS=Homo sapiens GN=CLASP2 PE=1 SV=2	1.215	0.280956	2.01841	1.036	0.051024	0.439519	1.22896	0.439491
Q8IWR0	Zinc finger CCCH domain-containing protein 7A OS=Homo sapiens GN=ZC3H7A PE=1 SV=1	1.161	0.215368	1.57254	1.036	0.051024	0.439519	1.00603	0.486124
Q7L4I2	Arginine/serine-rich coiled-coil protein 2 OS=Homo sapiens GN=RSRC2 PE=1 SV=1	1.077	0.107018	0.835984	1.036	0.051024	0.439519	0.637751	0.71703
Q06210	Glutamine--fructose-6-phosphate aminotransferase [isomerizing] 1 OS=Homo sapiens GN=GFPT1 PE=1 SV=3	1.026	0.0370307	0.360212	1.036	0.051024	0.439519	0.399866	1.20117
Q96SN8	CDK5 regulatory subunit-associated protein 2 OS=Homo sapiens GN=CDK5RAP2 PE=1 SV=5	1.023	0.0328061	0.331493	1.036	0.051024	0.439519	0.385506	1.05247
Q96PZ0	Pseudouridylate synthase 7 homolog OS=Homo sapiens GN=PUS7 PE=1 SV=2	1.02	0.0285692	0.30269	1.036	0.051024	0.439519	0.371105	0.935318
Q8N3Y7	Epidermal retinol dehydrogenase 2 OS=Homo sapiens GN=SDR16C5 PE=2 SV=2	1.009	0.0129262	0.19635	1.036	0.051024	0.439519	0.317934	0.633517
Q03135	Caveolin-1 OS=Homo sapiens GN=CAV1 PE=1 SV=4	0.996	-0.00578235	0.0691704	1.036	0.051024	0.439519	0.254345	0.397261
P62861	40S ribosomal protein S30 OS=Homo sapiens GN=FAU PE=1 SV=1	0.786	-0.347399	-2.25312	1.036	0.051024	0.439519	-0.906802	0.205759
Q14197	Peptidyl-tRNA hydrolase ICT1, mitochondrial OS=Homo sapiens GN=ICT1 PE=1 SV=1	1.144	0.194087	1.42787	1.035	0.0496308	0.430173	0.929023	0.503468
P63241	Eukaryotic translation initiation factor 5A-1 OS=Homo sapiens GN=EIF5A PE=1 SV=2	1.141	0.190299	1.40212	1.035	0.0496308	0.430173	0.916147	0.507955
P84103	Serine/arginine-rich splicing factor 3 OS=Homo sapiens GN=SRSF3 PE=1 SV=1	1.098	0.134878	1.02537	1.035	0.0496308	0.430173	0.727773	0.607096
O15400	Syntaxin-7 OS=Homo sapiens GN=STX7 PE=1 SV=4	1.097	0.133564	1.01644	1.035	0.0496308	0.430173	0.723305	0.610615
P60174	Triosephosphate isomerase OS=Homo sapiens GN=TPI1 PE=1 SV=3	1.071	0.0989585	0.781194	1.035	0.0496308	0.430173	0.605683	0.745798
O00186	Syntaxin-binding protein 3 OS=Homo sapiens GN=STXBP3 PE=1 SV=2	1.068	0.0949116	0.753683	1.035	0.0496308	0.430173	0.591928	0.770007
P00338	L-lactate dehydrogenase A chain OS=Homo sapiens GN=LDHA PE=1 SV=2	1.061	0.0854247	0.689191	1.035	0.0496308	0.430173	0.559682	0.839338
Q15031	Probable leucine--tRNA ligase, mitochondrial OS=Homo sapiens GN=LARS2 PE=1 SV=2	1.014	0.0200577	0.24483	1.035	0.0496308	0.430173	0.337502	0.768024
O95071	E3 ubiquitin-protein ligase UBR5 OS=Homo sapiens GN=UBR5 PE=1 SV=2	0.996	-0.00578235	0.0691704	1.035	0.0496308	0.430173	0.249672	0.399569
P49821	NADH dehydrogenase [ubiquinone] flavoprotein 1, mitochondrial OS=Homo sapiens GN=NDUFV1 PE=1 SV=4	0.992	-0.011588	0.029704	1.035	0.0496308	0.430173	0.229938	0.34093
P61026	Ras-related protein Rab-10 OS=Homo sapiens GN=RAB10 PE=1 SV=1	0.979	-0.0306192	-0.0996698	1.035	0.0496308	0.430173	0.165252	0.190477
P52907	F-actin-capping protein subunit alpha-1 OS=Homo sapiens GN=CAPZA1 PE=1 SV=3	1.074	0.102994	0.808627	1.034	0.0482362	0.420819	0.614723	0.711031
Q5JVF3	PCI domain-containing protein 2 OS=Homo sapiens GN=PCID2 PE=1 SV=2	1.058	0.0813396	0.661421	1.034	0.0482362	0.420819	0.54112	0.85615
O14964	Hepatocyte growth factor-regulated tyrosine kinase substrate OS=Homo sapiens GN=HGS PE=1 SV=1	1.015	0.0214797	0.254497	1.034	0.0482362	0.420819	0.337658	0.813235
P36957	Dihydrolipoyllysine-residue succinyltransferase component of 2-oxoglutarate dehydrogenase complex, mitochondrial OS=Homo sapiens GN=DLST PE=1 SV=4	1.015	0.0214797	0.254497	1.034	0.0482362	0.420819	0.337658	0.813235
P57076	UPF0769 protein C21orf59 OS=Homo sapiens GN=C21orf59 PE=1 SV=1	0.967	-0.0484122	-0.220625	1.034	0.0482362	0.420819	0.100097	0.0929057
P51580	Thiopurine S-methyltransferase OS=Homo sapiens GN=TPMT PE=1 SV=1	0.96	-0.0588937	-0.291878	1.034	0.0482362	0.420819	0.0644705	0.0525391
Q6UN15	Pre-mRNA 3'-end-processing factor FIP1 OS=Homo sapiens GN=FIP1L1 PE=1 SV=1	0.947	-0.0785637	-0.425593	1.034	0.0482362	0.420819	-0.00238712	0.0015623
O43292	Glycosylphosphatidylinositol anchor attachment 1 protein OS=Homo sapiens GN=GPAA1 PE=1 SV=3	1.101	0.138814	1.05213	1.033	0.0468403	0.411455	0.731794	0.580574
Q8WZA0	Protein LZIC OS=Homo sapiens GN=LZIC PE=1 SV=1	1.095	0.130931	0.998541	1.033	0.0468403	0.411455	0.704998	0.600027
P43487	Ran-specific GTPase-activating protein OS=Homo sapiens GN=RANBP1 PE=1 SV=1	1.088	0.121679	0.935644	1.033	0.0468403	0.411455	0.67355	0.626634
Q9Y3Y2	Chromatin target of PRMT1 protein OS=Homo sapiens GN=CHTOP PE=1 SV=2	1.078	0.108357	0.845085	1.033	0.0468403	0.411455	0.62827	0.674587
P30419	Glycylpeptide N-tetradecanoyltransferase 1 OS=Homo sapiens GN=NMT1 PE=1 SV=2	1.041	0.0579701	0.502557	1.033	0.0468403	0.411455	0.457006	1.19898
P27635	60S ribosomal protein L10 OS=Homo sapiens GN=RPL10 PE=1 SV=4	1.039	0.0551957	0.483696	1.033	0.0468403	0.411455	0.447576	1.29017
Q96PU8	Protein quaking OS=Homo sapiens GN=QKI PE=1 SV=1	1.025	0.0356239	0.350648	1.033	0.0468403	0.411455	0.381052	1.2951
P45880	Voltage-dependent anion-selective channel protein 2 OS=Homo sapiens GN=VDAC2 PE=1 SV=2	1.023	0.0328061	0.331493	1.033	0.0468403	0.411455	0.371474	1.16587
P24928	DNA-directed RNA polymerase II subunit RPB1 OS=Homo sapiens GN=POLR2A PE=1 SV=2	1.021	0.0299829	0.312301	1.033	0.0468403	0.411455	0.361878	1.0621
P78371	T-complex protein 1 subunit beta OS=Homo sapiens GN=CCT2 PE=1 SV=4	1.02	0.0285692	0.30269	1.033	0.0468403	0.411455	0.357073	1.01674
Q9H583	HEAT repeat-containing protein 1 OS=Homo sapiens GN=HEATR1 PE=1 SV=3	1.003	0.00432161	0.137857	1.033	0.0468403	0.411455	0.274656	0.531378
Q96BN8	Ubiquitin thioesterase otulin OS=Homo sapiens GN=OTULIN PE=1 SV=3	0.984	-0.0232698	-0.049708	1.033	0.0468403	0.411455	0.180874	0.239171
Q9H9B4	Sideroflexin-1 OS=Homo sapiens GN=SFXN1 PE=1 SV=4	0.984	-0.0232698	-0.049708	1.033	0.0468403	0.411455	0.180874	0.239171
Q5T1V6	Probable ATP-dependent RNA helicase DDX59 OS=Homo sapiens GN=DDX59 PE=1 SV=1	0.982	-0.0262051	-0.0696623	1.033	0.0468403	0.411455	0.170896	0.216975
Q9BZE4	Nucleolar GTP-binding protein 1 OS=Homo sapiens GN=GTPBP4 PE=1 SV=3	0.974	-0.0380063	-0.149887	1.033	0.0468403	0.411455	0.130784	0.141223
Q15643	Thyroid receptor-interacting protein 11 OS=Homo sapiens GN=TRIP11 PE=1 SV=3	0.961	-0.0573917	-0.281667	1.033	0.0468403	0.411455	0.064894	0.0544542
P50395	Rab GDP dissociation inhibitor beta OS=Homo sapiens GN=GDI2 PE=1 SV=2	0.949	-0.07552	-0.404903	1.033	0.0468403	0.411455	0.00327605	0.00222468
Q5T280	Putative methyltransferase C9orf114 OS=Homo sapiens GN=C9orf114 PE=1 SV=3	1.094	0.129613	0.98958	1.032	0.045443	0.402082	0.695831	0.594648
Q5F1R6	DnaJ homolog subfamily C member 21 OS=Homo sapiens GN=DNAJC21 PE=1 SV=2	1.075	0.104337	0.817755	1.032	0.045443	0.402082	0.609918	0.679689
Q07020	60S ribosomal protein L18 OS=Homo sapiens GN=RPL18 PE=1 SV=2	1.073	0.10165	0.799491	1.032	0.045443	0.402082	0.600786	0.691764
P36776	Lon protease homolog, mitochondrial OS=Homo sapiens GN=LONP1 PE=1 SV=2	1.066	0.0922074	0.7353	1.032	0.045443	0.402082	0.568691	0.741283
Q9H098	Protein FAM107B OS=Homo sapiens GN=FAM107B PE=1 SV=1	1.052	0.0731347	0.605645	1.032	0.045443	0.402082	0.503864	0.896568
Q9UP95	Solute carrier family 12 member 4 OS=Homo sapiens GN=SLC12A4 PE=1 SV=2	1.046	0.0648829	0.549549	1.032	0.045443	0.402082	0.475816	1.00933
Q86W42	THO complex subunit 6 homolog OS=Homo sapiens GN=THOC6 PE=1 SV=1	1.045	0.0635029	0.540168	1.032	0.045443	0.402082	0.471125	1.03322
O75643	U5 small nuclear ribonucleoprotein 200 kDa helicase OS=Homo sapiens GN=SNRNP200 PE=1 SV=2	1.044	0.0621217	0.530779	1.032	0.045443	0.402082	0.466431	1.0591
P08243	Asparagine synthetase [glutamine-hydrolyzing] OS=Homo sapiens GN=ASNS PE=1 SV=4	1.044	0.0621217	0.530779	1.032	0.045443	0.402082	0.466431	1.0591
Q13177	Serine/threonine-protein kinase PAK 2 OS=Homo sapiens GN=PAK2 PE=1 SV=3	1.042	0.0593553	0.511974	1.032	0.045443	0.402082	0.457028	1.11821
O43447	Peptidyl-prolyl cis-trans isomerase H OS=Homo sapiens GN=PPIH PE=1 SV=1	1.016	0.0229004	0.264155	1.032	0.045443	0.402082	0.333118	0.886191
P51531	Probable global transcription activator SNF2L2 OS=Homo sapiens GN=SMARCA2 PE=1 SV=2	1.013	0.0186342	0.235153	1.032	0.045443	0.402082	0.318617	0.787538
P12814	Alpha-actinin-1 OS=Homo sapiens GN=ACTN1 PE=1 SV=2	1.011	0.015783	0.215771	1.032	0.045443	0.402082	0.308926	0.729439
Q92599	Septin-8 OS=Homo sapiens GN=SEPT8 PE=1 SV=4	0.992	-0.011588	0.029704	1.032	0.045443	0.402082	0.215893	0.343849
Q9NUQ8	ATP-binding cassette sub-family F member 3 OS=Homo sapiens GN=ABCF3 PE=1 SV=2	0.988	-0.0174171	-0.00992193	1.032	0.045443	0.402082	0.19608	0.287598
P18754	Regulator of chromosome condensation OS=Homo sapiens GN=RCC1 PE=1 SV=1	0.941	-0.0877334	-0.487929	1.032	0.045443	0.402082	-0.0429235	0.0274346
O95202	LETM1 and EF-hand domain-containing protein 1, mitochondrial OS=Homo sapiens GN=LETM1 PE=1 SV=1	1.12	0.163499	1.21994	1.031	0.0440443	0.392701	0.806318	0.520369
P20340	Ras-related protein Rab-6A OS=Homo sapiens GN=RAB6A PE=1 SV=3	1.023	0.0328061	0.331493	1.031	0.0440443	0.392701	0.362097	1.2702
P02786	Transferrin receptor protein 1 OS=Homo sapiens GN=TFRC PE=1 SV=2	1.018	0.0257376	0.283441	1.031	0.0440443	0.392701	0.338071	0.991437
Q969G3	SWI/SNF-related matrix-associated actin-dependent regulator of chromatin subfamily E member 1 OS=Homo sapiens GN=SMARCE1 PE=1 SV=2	1.015	0.0214797	0.254497	1.031	0.0440443	0.392701	0.323599	0.87311
Q9H444	Charged multivesicular body protein 4b OS=Homo sapiens GN=CHMP4B PE=1 SV=1	1.013	0.0186342	0.235153	1.031	0.0440443	0.392701	0.313927	0.805442
O75223	Gamma-glutamylcyclotransferase OS=Homo sapiens GN=GGCT PE=1 SV=1	0.992	-0.011588	0.029704	1.031	0.0440443	0.392701	0.211202	0.344922
O14777	Kinetochore protein NDC80 homolog OS=Homo sapiens GN=NDC80 PE=1 SV=1	0.983	-0.0247367	-0.0596804	1.031	0.0440443	0.392701	0.16651	0.224743
P11940	Polyadenylate-binding protein 1 OS=Homo sapiens GN=PABPC1 PE=1 SV=2	0.973	-0.0394883	-0.159961	1.031	0.0440443	0.392701	0.11637	0.127114
Q02878	60S ribosomal protein L6 OS=Homo sapiens GN=RPL6 PE=1 SV=3	0.96	-0.0588937	-0.291878	1.031	0.0440443	0.392701	0.0504113	0.0424359
O14497	AT-rich interactive domain-containing protein 1A OS=Homo sapiens GN=ARID1A PE=1 SV=3	1.129	0.175045	1.29843	1.03	0.0426443	0.383309	0.840869	0.498593
Q6YN16	Hydroxysteroid dehydrogenase-like protein 2 OS=Homo sapiens GN=HSDL2 PE=1 SV=1	1.104	0.14274	1.07882	1.03	0.0426443	0.383309	0.731064	0.548731
Q8WUM4	Programmed cell death 6-interacting protein OS=Homo sapiens GN=PDCD6IP PE=1 SV=1	1.019	0.0271541	0.293071	1.03	0.0426443	0.383309	0.33819	1.07348
Q15185	Prostaglandin E synthase 3 OS=Homo sapiens GN=PTGES3 PE=1 SV=1	1.017	0.0243197	0.273802	1.03	0.0426443	0.383309	0.328556	0.978289
Q9NZ32	Actin-related protein 10 OS=Homo sapiens GN=ACTR10 PE=1 SV=1	1.011	0.015783	0.215771	1.03	0.0426443	0.383309	0.29954	0.760447
Q9Y2W1	Thyroid hormone receptor-associated protein 3 OS=Homo sapiens GN=THRAP3 PE=1 SV=2	0.987	-0.018878	-0.0198533	1.03	0.0426443	0.383309	0.181728	0.273318
Q9BV40	Vesicle-associated membrane protein 8 OS=Homo sapiens GN=VAMP8 PE=1 SV=1	0.959	-0.0603973	-0.302099	1.03	0.0426443	0.383309	0.040605	0.0338955
O43813	LanC-like protein 1 OS=Homo sapiens GN=LANCL1 PE=1 SV=1	0.933	-0.100051	-0.571663	1.03	0.0426443	0.383309	-0.0941769	0.0574822
Q7Z7K6	Centromere protein V OS=Homo sapiens GN=CENPV PE=1 SV=1	0.915	-0.128156	-0.762722	1.03	0.0426443	0.383309	-0.189706	0.0988323
P78406	mRNA export factor OS=Homo sapiens GN=RAE1 PE=1 SV=1	1.189	0.249749	1.80626	1.029	0.041243	0.37391	1.09008	0.43174
Q8NC51	Plasminogen activator inhibitor 1 RNA-binding protein OS=Homo sapiens GN=SERBP1 PE=1 SV=2	1.052	0.0731347	0.605645	1.029	0.041243	0.37391	0.489778	0.830069
P47712	Cytosolic phospholipase A2 OS=Homo sapiens GN=PLA2G4A PE=1 SV=2	0.996	-0.00578235	0.0691704	1.029	0.041243	0.37391	0.22154	0.416181
Q9BVQ7	Spermatogenesis-associated protein 5-like protein 1 OS=Homo sapiens GN=SPATA5L1 PE=1 SV=2	0.983	-0.0247367	-0.0596804	1.029	0.041243	0.37391	0.157115	0.221298
Q9H0C8	Integrin-linked kinase-associated serine/threonine phosphatase 2C OS=Homo sapiens GN=ILKAP PE=1 SV=1	0.968	-0.046921	-0.210489	1.029	0.041243	0.37391	0.0817108	0.0828047
Q9NQS1	Cell death regulator Aven OS=Homo sapiens GN=AVEN PE=1 SV=1	0.959	-0.0603973	-0.302099	1.029	0.041243	0.37391	0.0359054	0.0302924
Q9H9A5	CCR4-NOT transcription complex subunit 10 OS=Homo sapiens GN=CNOT10 PE=1 SV=1	1.155	0.207893	1.52172	1.028	0.0398403	0.364501	0.943112	0.455523
P30405	Peptidyl-prolyl cis-trans isomerase F, mitochondrial OS=Homo sapiens GN=PPIF PE=1 SV=1	1.071	0.0989585	0.781194	1.028	0.0398403	0.364501	0.572847	0.653506
Q9UNF1	Melanoma-associated antigen D2 OS=Homo sapiens GN=MAGED2 PE=1 SV=2	1.062	0.0867838	0.698431	1.028	0.0398403	0.364501	0.531466	0.71268
Q96IZ7	Serine/Arginine-related protein 53 OS=Homo sapiens GN=RSRC1 PE=1 SV=1	1.044	0.0621217	0.530779	1.028	0.0398403	0.364501	0.44764	0.932162
Q16643	Drebrin OS=Homo sapiens GN=DBN1 PE=1 SV=4	1.041	0.0579701	0.502557	1.028	0.0398403	0.364501	0.433529	0.997743
Q08379	Golgin subfamily A member 2 OS=Homo sapiens GN=GOLGA2 PE=1 SV=3	1.037	0.0524159	0.464799	1.028	0.0398403	0.364501	0.41465	1.11564
O94992	Protein HEXIM1 OS=Homo sapiens GN=HEXIM1 PE=1 SV=1	0.99	-0.0144996	0.00991132	1.028	0.0398403	0.364501	0.187206	0.316328
O95295	SNARE-associated protein Snapin OS=Homo sapiens GN=SNAPIN PE=1 SV=1	0.969	-0.0454314	-0.200362	1.028	0.0398403	0.364501	0.0820691	0.0862029
Q9BVC4	Target of rapamycin complex subunit LST8 OS=Homo sapiens GN=MLST8 PE=1 SV=1	0.952	-0.0709665	-0.373948	1.028	0.0398403	0.364501	-0.00472389	0.00355161
P49585	Choline-phosphate cytidylyltransferase A OS=Homo sapiens GN=PCYT1A PE=1 SV=2	0.946	-0.0800879	-0.435956	1.028	0.0398403	0.364501	-0.0357275	0.0253407
Q9Y3U8	60S ribosomal protein L36 OS=Homo sapiens GN=RPL36 PE=1 SV=3	0.938	-0.0923402	-0.519245	1.028	0.0398403	0.364501	-0.0773724	0.0507828
Q9BTT0	Acidic leucine-rich nuclear phosphoprotein 32 family member E OS=Homo sapiens GN=ANP32E PE=1 SV=1	1.082	0.1137	0.88141	1.027	0.0384362	0.355082	0.618246	0.591428
Q9H4M9	EH domain-containing protein 1 OS=Homo sapiens GN=EHD1 PE=1 SV=2	1.05	0.0703893	0.586982	1.027	0.0384362	0.355082	0.471032	0.81345
O94763	Unconventional prefoldin RPB5 interactor 1 OS=Homo sapiens GN=URI1 PE=1 SV=3	1.035	0.0496308	0.445866	1.027	0.0384362	0.355082	0.400474	1.14356
Q6PGP7	Tetratricopeptide repeat protein 37 OS=Homo sapiens GN=TTC37 PE=1 SV=1	0.984	-0.0232698	-0.049708	1.027	0.0384362	0.355082	0.152687	0.23022
Q9NPD3	Exosome complex component RRP41 OS=Homo sapiens GN=EXOSC4 PE=1 SV=3	0.983	-0.0247367	-0.0596804	1.027	0.0384362	0.355082	0.147701	0.217521
P51965	Ubiquitin-conjugating enzyme E2 E1 OS=Homo sapiens GN=UBE2E1 PE=1 SV=1	0.977	-0.0335695	-0.119726	1.027	0.0384362	0.355082	0.117678	0.150561
P61201	COP9 signalosome complex subunit 2 OS=Homo sapiens GN=COPS2 PE=1 SV=1	0.967	-0.0484122	-0.220625	1.027	0.0384362	0.355082	0.0672283	0.068575
Q9Y265	RuvB-like 1 OS=Homo sapiens GN=RUVBL1 PE=1 SV=1	0.956	-0.0649175	-0.332828	1.027	0.0384362	0.355082	0.0111271	0.00903444
Q8NCG7	Sn1-specific diacylglycerol lipase beta OS=Homo sapiens GN=DAGLB PE=1 SV=2	0.919	-0.121863	-0.719942	1.027	0.0384362	0.355082	-0.18243	0.10144
Q14139	Ubiquitin conjugation factor E4 A OS=Homo sapiens GN=UBE4A PE=1 SV=2	0.912	-0.132894	-0.79493	1.027	0.0384362	0.355082	-0.219924	0.114956
Q8TF05	Serine/threonine-protein phosphatase 4 regulatory subunit 1 OS=Homo sapiens GN=PPP4R1 PE=1 SV=1	1.1	0.137504	1.04322	1.026	0.0370307	0.345655	0.694438	0.528249
Q9UFW8	CGG triplet repeat-binding protein 1 OS=Homo sapiens GN=CGGBP1 PE=1 SV=2	1.095	0.130931	0.998541	1.026	0.0370307	0.345655	0.672098	0.540839
P56945	Breast cancer anti-estrogen resistance protein 1 OS=Homo sapiens GN=BCAR1 PE=1 SV=2	1.046	0.0648829	0.549549	1.026	0.0370307	0.345655	0.447602	0.845983
Q8WUM0	Nuclear pore complex protein Nup133 OS=Homo sapiens GN=NUP133 PE=1 SV=2	1.035	0.0496308	0.445866	1.026	0.0370307	0.345655	0.39576	1.09597
Q8WX92	Negative elongation factor B OS=Homo sapiens GN=NELFB PE=1 SV=1	1.035	0.0496308	0.445866	1.026	0.0370307	0.345655	0.39576	1.09597
P55010	Eukaryotic translation initiation factor 5 OS=Homo sapiens GN=EIF5 PE=1 SV=2	1.012	0.0172093	0.225466	1.026	0.0370307	0.345655	0.285561	0.879276
Q15019	Septin-2 OS=Homo sapiens GN=SEPT2 PE=1 SV=1	1.011	0.015783	0.215771	1.026	0.0370307	0.345655	0.280713	0.839431
P36543	V-type proton ATPase subunit E 1 OS=Homo sapiens GN=ATP6V1E1 PE=1 SV=1	0.998	-0.00288828	0.0888445	1.026	0.0370307	0.345655	0.21725	0.468732
P98170	E3 ubiquitin-protein ligase XIAP OS=Homo sapiens GN=XIAP PE=1 SV=2	0.994	-0.00868224	0.0494573	1.026	0.0370307	0.345655	0.197556	0.38772
Q8IVL5	Prolyl 3-hydroxylase 2 OS=Homo sapiens GN=P3H2 PE=1 SV=1	0.989	-0.0159576	0	1.026	0.0370307	0.345655	0.172827	0.30103
Q9NX58	Cell growth-regulating nucleolar protein OS=Homo sapiens GN=LYAR PE=1 SV=2	0.973	-0.0394883	-0.159961	1.026	0.0370307	0.345655	0.092847	0.110178
P55209	Nucleosome assembly protein 1-like 1 OS=Homo sapiens GN=NAP1L1 PE=1 SV=1	0.968	-0.046921	-0.210489	1.026	0.0370307	0.345655	0.0675832	0.0714929
P35658	Nuclear pore complex protein Nup214 OS=Homo sapiens GN=NUP214 PE=1 SV=2	0.968	-0.046921	-0.210489	1.026	0.0370307	0.345655	0.0675832	0.0714929
Q96JM3	Chromosome alignment-maintaining phosphoprotein 1 OS=Homo sapiens GN=CHAMP1 PE=1 SV=2	0.94	-0.0892673	-0.498357	1.026	0.0370307	0.345655	-0.0763508	0.0525403
P38432	Coilin OS=Homo sapiens GN=COIL PE=1 SV=1	0.862	-0.21424	-1.34792	1.026	0.0370307	0.345655	-0.501131	0.180582
Q8WY22	BRI3-binding protein OS=Homo sapiens GN=BRI3BP PE=1 SV=1	1.48	0.565597	3.95338	1.025	0.0356239	0.336218	2.1448	0.350677
P23229	Integrin alpha-6 OS=Homo sapiens GN=ITGA6 PE=1 SV=5	1.219	0.285698	2.05064	1.025	0.0356239	0.336218	1.19343	0.401711
Q9Y3B7	39S ribosomal protein L11, mitochondrial OS=Homo sapiens GN=MRPL11 PE=1 SV=1	1.14	0.189034	1.39352	1.025	0.0356239	0.336218	0.86487	0.456824
P35250	Replication factor C subunit 2 OS=Homo sapiens GN=RFC2 PE=1 SV=3	1.095	0.130931	0.998541	1.025	0.0356239	0.336218	0.667379	0.532784
P05423	DNA-directed RNA polymerase III subunit RPC4 OS=Homo sapiens GN=POLR3D PE=1 SV=2	1.088	0.121679	0.935644	1.025	0.0356239	0.336218	0.635931	0.552249
Q9H501	ESF1 homolog OS=Homo sapiens GN=ESF1 PE=1 SV=1	1.073	0.10165	0.799491	1.025	0.0356239	0.336218	0.567854	0.60806
Q96FS4	Signal-induced proliferation-associated protein 1 OS=Homo sapiens GN=SIPA1 PE=1 SV=1	1.057	0.0799754	0.652148	1.025	0.0356239	0.336218	0.494183	0.705621
O00299	Chloride intracellular channel protein 1 OS=Homo sapiens GN=CLIC1 PE=1 SV=4	1.037	0.0524159	0.464799	1.025	0.0356239	0.336218	0.400508	0.994274
Q14789	Golgin subfamily B member 1 OS=Homo sapiens GN=GOLGB1 PE=1 SV=2	1.034	0.0482362	0.436386	1.025	0.0356239	0.336218	0.386302	1.08576
P30876	DNA-directed RNA polymerase II subunit RPB2 OS=Homo sapiens GN=POLR2B PE=1 SV=1	1.03	0.0426443	0.398373	1.025	0.0356239	0.336218	0.367295	1.26972
Q13283	Ras GTPase-activating protein-binding protein 1 OS=Homo sapiens GN=G3BP1 PE=1 SV=1	1	0	0.108479	1.025	0.0356239	0.336218	0.222348	0.520984
P56537	Eukaryotic translation initiation factor 6 OS=Homo sapiens GN=EIF6 PE=1 SV=1	0.987	-0.018878	-0.0198533	1.025	0.0356239	0.336218	0.158182	0.269583
Q7Z3K3	Pogo transposable element with ZNF domain OS=Homo sapiens GN=POGZ PE=1 SV=2	0.978	-0.0320936	-0.109693	1.025	0.0356239	0.336218	0.113263	0.154426
P08708	40S ribosomal protein S17 OS=Homo sapiens GN=RPS17 PE=1 SV=2	0.944	-0.0831412	-0.456712	1.025	0.0356239	0.336218	-0.0602469	0.0438346
O75351	Vacuolar protein sorting-associated protein 4B OS=Homo sapiens GN=VPS4B PE=1 SV=2	0.837	-0.2567	-1.63656	1.025	0.0356239	0.336218	-0.650171	0.201354
O00443	Phosphatidylinositol 4-phosphate 3-kinase C2 domain-containing subunit alpha OS=Homo sapiens GN=PIK3C2A PE=1 SV=2	0.745	-0.424688	-2.77853	1.025	0.0356239	0.336218	-1.22116	0.239079
Q15654	Thyroid receptor-interacting protein 6 OS=Homo sapiens GN=TRIP6 PE=1 SV=3	1.149	0.200379	1.47064	1.024	0.0342157	0.326773	0.898709	0.442726
Q9Y2S7	Polymerase delta-interacting protein 2 OS=Homo sapiens GN=POLDIP2 PE=1 SV=1	1.122	0.166073	1.23743	1.024	0.0342157	0.326773	0.782103	0.474129
Q9NPA8	Transcription and mRNA export factor ENY2 OS=Homo sapiens GN=ENY2 PE=1 SV=1	1.052	0.0731347	0.605645	1.024	0.0342157	0.326773	0.466209	0.732798
P49916	DNA ligase 3 OS=Homo sapiens GN=LIG3 PE=1 SV=2	1.042	0.0593553	0.511974	1.024	0.0342157	0.326773	0.419373	0.859021
Q16822	Phosphoenolpyruvate carboxykinase [GTP], mitochondrial OS=Homo sapiens GN=PCK2 PE=1 SV=3	1.017	0.0243197	0.273802	1.024	0.0342157	0.326773	0.300288	1.25178
O14929	Histone acetyltransferase type B catalytic subunit OS=Homo sapiens GN=HAT1 PE=1 SV=1	1.015	0.0214797	0.254497	1.024	0.0342157	0.326773	0.290635	1.10373
P40939	Trifunctional enzyme subunit alpha, mitochondrial OS=Homo sapiens GN=HADHA PE=1 SV=2	1.014	0.0200577	0.24483	1.024	0.0342157	0.326773	0.285801	1.04265
Q9UPN3	Microtubule-actin cross-linking factor 1, isoforms 1/2/3/5 OS=Homo sapiens GN=MACF1 PE=1 SV=4	1.013	0.0186342	0.235153	1.024	0.0342157	0.326773	0.280963	0.987615
Q92783	Signal transducing adapter molecule 1 OS=Homo sapiens GN=STAM PE=1 SV=3	1.012	0.0172093	0.225466	1.024	0.0342157	0.326773	0.276119	0.937412
O76071	Probable cytosolic iron-sulfur protein assembly protein CIAO1 OS=Homo sapiens GN=CIAO1 PE=1 SV=1	1.012	0.0172093	0.225466	1.024	0.0342157	0.326773	0.276119	0.937412
P61088	Ubiquitin-conjugating enzyme E2 N OS=Homo sapiens GN=UBE2N PE=1 SV=1	1.009	0.0129262	0.19635	1.024	0.0342157	0.326773	0.261561	0.808134
Q16831	Uridine phosphorylase 1 OS=Homo sapiens GN=UPP1 PE=1 SV=1	1.002	0.00288251	0.128074	1.024	0.0342157	0.326773	0.227423	0.581366
P20618	Proteasome subunit beta type-1 OS=Homo sapiens GN=PSMB1 PE=1 SV=2	1.001	0.00144197	0.118282	1.024	0.0342157	0.326773	0.222527	0.554546
Q9NVI1	Fanconi anemia group I protein OS=Homo sapiens GN=FANCI PE=1 SV=4	0.993	-0.0101344	0.0395853	1.024	0.0342157	0.326773	0.183179	0.373399
Q6NZY4	Zinc finger CCHC domain-containing protein 8 OS=Homo sapiens GN=ZCCHC8 PE=1 SV=2	0.983	-0.0247367	-0.0596804	1.024	0.0342157	0.326773	0.133546	0.211123
Q15233	Non-POU domain-containing octamer-binding protein OS=Homo sapiens GN=NONO PE=1 SV=4	0.978	-0.0320936	-0.109693	1.024	0.0342157	0.326773	0.10854	0.151085
Q6P6C2	RNA demethylase ALKBH5 OS=Homo sapiens GN=ALKBH5 PE=1 SV=2	0.959	-0.0603973	-0.302099	1.024	0.0342157	0.326773	0.0123367	0.0109796
P35268	60S ribosomal protein L22 OS=Homo sapiens GN=RPL22 PE=1 SV=2	0.928	-0.107803	-0.624363	1.024	0.0342157	0.326773	-0.148795	0.0931493
Q9HD33	39S ribosomal protein L47, mitochondrial OS=Homo sapiens GN=MRPL47 PE=1 SV=2	1.148	0.199123	1.46211	1.023	0.0328061	0.317317	0.889711	0.438963
O60293	Zinc finger C3H1 domain-containing protein OS=Homo sapiens GN=ZFC3H1 PE=1 SV=3	1.1	0.137504	1.04322	1.023	0.0328061	0.317317	0.680269	0.505818
Q96EK5	KIF1-binding protein OS=Homo sapiens GN=KIF1BP PE=1 SV=1	1.091	0.125651	0.962649	1.023	0.0328061	0.317317	0.639983	0.526817
Q8IUR0	Trafficking protein particle complex subunit 5 OS=Homo sapiens GN=TRAPPC5 PE=1 SV=1	1.069	0.0962619	0.762862	1.023	0.0328061	0.317317	0.54009	0.603707
Q08378	Golgin subfamily A member 3 OS=Homo sapiens GN=GOLGA3 PE=1 SV=2	1.056	0.0786098	0.642865	1.023	0.0328061	0.317317	0.480091	0.681725
Q9Y4A5	Transformation/transcription domain-associated protein OS=Homo sapiens GN=TRRAP PE=1 SV=3	1.049	0.0690147	0.577637	1.023	0.0328061	0.317317	0.447477	0.744234
O94782	Ubiquitin carboxyl-terminal hydrolase 1 OS=Homo sapiens GN=USP1 PE=1 SV=1	1.013	0.0186342	0.235153	1.023	0.0328061	0.317317	0.276235	1.02692
Q06787	Fragile X mental retardation protein 1 OS=Homo sapiens GN=FMR1 PE=1 SV=1	1.01	0.0143553	0.206065	1.023	0.0328061	0.317317	0.261691	0.875048
P06703	Protein S100-A6 OS=Homo sapiens GN=S100A6 PE=1 SV=1	0.991	-0.013043	0.0198126	1.023	0.0328061	0.317317	0.168565	0.336957
Q9Y295	Developmentally-regulated GTP-binding protein 1 OS=Homo sapiens GN=DRG1 PE=1 SV=1	0.991	-0.013043	0.0198126	1.023	0.0328061	0.317317	0.168565	0.336957
A0AVT1	Ubiquitin-like modifier-activating enzyme 6 OS=Homo sapiens GN=UBA6 PE=1 SV=1	0.978	-0.0320936	-0.109693	1.023	0.0328061	0.317317	0.103812	0.14759
P35998	26S protease regulatory subunit 7 OS=Homo sapiens GN=PSMC2 PE=1 SV=3	0.976	-0.0350469	-0.129769	1.023	0.0328061	0.317317	0.0937742	0.126599
Q9BUP3	Oxidoreductase HTATIP2 OS=Homo sapiens GN=HTATIP2 PE=1 SV=2	0.963	-0.0543923	-0.261278	1.023	0.0328061	0.317317	0.0280197	0.0275508
Q96SZ5	2-aminoethanethiol dioxygenase OS=Homo sapiens GN=ADO PE=1 SV=2	0.904	-0.145605	-0.88134	1.023	0.0328061	0.317317	-0.282011	0.142662
Q86VN1	Vacuolar protein-sorting-associated protein 36 OS=Homo sapiens GN=VPS36 PE=1 SV=1	1.233	0.302173	2.16264	1.022	0.0313952	0.307852	1.23524	0.387236
Q9UHQ9	NADH-cytochrome b5 reductase 1 OS=Homo sapiens GN=CYB5R1 PE=1 SV=1	1.111	0.151859	1.14081	1.022	0.0313952	0.307852	0.72433	0.478598
P80303	Nucleobindin-2 OS=Homo sapiens GN=NUCB2 PE=1 SV=2	1.09	0.124328	0.953656	1.022	0.0313952	0.307852	0.630754	0.521125
Q9UNX3	60S ribosomal protein L26-like 1 OS=Homo sapiens GN=RPL26L1 PE=1 SV=1	1.067	0.0935602	0.744497	1.022	0.0313952	0.307852	0.526175	0.60139
Q8IWF6	Protein DENND6A OS=Homo sapiens GN=DENND6A PE=1 SV=1	1.062	0.0867838	0.698431	1.022	0.0313952	0.307852	0.503142	0.627636
Q16204	Coiled-coil domain-containing protein 6 OS=Homo sapiens GN=CCDC6 PE=1 SV=2	1.045	0.0635029	0.540168	1.022	0.0313952	0.307852	0.42401	0.768974
Q9UN86	Ras GTPase-activating protein-binding protein 2 OS=Homo sapiens GN=G3BP2 PE=1 SV=2	1.04	0.0565835	0.493131	1.022	0.0313952	0.307852	0.400491	0.839491
O15355	Protein phosphatase 1G OS=Homo sapiens GN=PPM1G PE=1 SV=1	1.009	0.0129262	0.19635	1.022	0.0313952	0.307852	0.252101	0.858373
O95831	Apoptosis-inducing factor 1, mitochondrial OS=Homo sapiens GN=AIFM1 PE=1 SV=1	1.007	0.0100637	0.176891	1.022	0.0313952	0.307852	0.242372	0.774734
P11182	Lipoamide acyltransferase component of branched-chain alpha-keto acid dehydrogenase complex, mitochondrial OS=Homo sapiens GN=DBT PE=1 SV=3	1	0	0.108479	1.022	0.0313952	0.307852	0.208165	0.54619
Q9BTE7	DCN1-like protein 5 OS=Homo sapiens GN=DCUN1D5 PE=1 SV=1	0.987	-0.018878	-0.0198533	1.022	0.0313952	0.307852	0.143999	0.266804
Q99436	Proteasome subunit beta type-7 OS=Homo sapiens GN=PSMB7 PE=1 SV=1	0.983	-0.0247367	-0.0596804	1.022	0.0313952	0.307852	0.124086	0.206277
P13639	Elongation factor 2 OS=Homo sapiens GN=EEF2 PE=1 SV=4	0.983	-0.0247367	-0.0596804	1.022	0.0313952	0.307852	0.124086	0.206277
Q8N1G2	Cap-specific mRNA (nucleoside-2'-O-)-methyltransferase 1 OS=Homo sapiens GN=CMTR1 PE=1 SV=1	0.981	-0.027675	-0.0796544	1.022	0.0313952	0.307852	0.114099	0.179677
Q9NZB2	Constitutive coactivator of PPAR-gamma-like protein 1 OS=Homo sapiens GN=FAM120A PE=1 SV=2	0.967	-0.0484122	-0.220625	1.022	0.0313952	0.307852	0.0436136	0.0477586
Q9NVX2	Notchless protein homolog 1 OS=Homo sapiens GN=NLE1 PE=1 SV=4	0.96	-0.0588937	-0.291878	1.022	0.0313952	0.307852	0.00798708	0.0074256
Q96A65	Exocyst complex component 4 OS=Homo sapiens GN=EXOC4 PE=1 SV=1	0.952	-0.0709665	-0.373948	1.022	0.0313952	0.307852	-0.033048	0.0275767
Q9BY43	Charged multivesicular body protein 4a OS=Homo sapiens GN=CHMP4A PE=1 SV=3	0.563	-0.828793	-5.52562	1.022	0.0313952	0.307852	-2.60888	0.271296
Q8WZA9	Immunity-related GTPase family Q protein OS=Homo sapiens GN=IRGQ PE=1 SV=1	1.068	0.0949116	0.753683	1.021	0.0299829	0.298379	0.526031	0.584996
O00151	PDZ and LIM domain protein 1 OS=Homo sapiens GN=PDLIM1 PE=1 SV=4	1.062	0.0867838	0.698431	1.021	0.0299829	0.298379	0.498405	0.61445
O43707	Alpha-actinin-4 OS=Homo sapiens GN=ACTN4 PE=1 SV=2	1.048	0.0676387	0.568283	1.021	0.0299829	0.298379	0.433331	0.716244
O60841	Eukaryotic translation initiation factor 5B OS=Homo sapiens GN=EIF5B PE=1 SV=4	1.045	0.0635029	0.540168	1.021	0.0299829	0.298379	0.419274	0.747834
P62314	Small nuclear ribonucleoprotein Sm D1 OS=Homo sapiens GN=SNRPD1 PE=1 SV=1	1.04	0.0565835	0.493131	1.021	0.0299829	0.298379	0.395755	0.813639
P53609	Geranylgeranyl transferase type-1 subunit beta OS=Homo sapiens GN=PGGT1B PE=1 SV=2	1.032	0.045443	0.417397	1.021	0.0299829	0.298379	0.357888	0.97924
Q14126	Desmoglein-2 OS=Homo sapiens GN=DSG2 PE=1 SV=2	1.009	0.0129262	0.19635	1.021	0.0299829	0.298379	0.247365	0.887807
Q15075	Early endosome antigen 1 OS=Homo sapiens GN=EEA1 PE=1 SV=2	1.008	0.0114956	0.186626	1.021	0.0299829	0.298379	0.242503	0.841119
Q00341	Vigilin OS=Homo sapiens GN=HDLBP PE=1 SV=2	1.005	0.0071955	0.157393	1.021	0.0299829	0.298379	0.227886	0.719001
P07919	Cytochrome b-c1 complex subunit 6, mitochondrial OS=Homo sapiens GN=UQCRH PE=1 SV=2	1.003	0.00432161	0.137857	1.021	0.0299829	0.298379	0.218118	0.648844
P41091	Eukaryotic translation initiation factor 2 subunit 3 OS=Homo sapiens GN=EIF2S3 PE=1 SV=3	0.993	-0.0101344	0.0395853	1.021	0.0299829	0.298379	0.168982	0.380874
Q92900	Regulator of nonsense transcripts 1 OS=Homo sapiens GN=UPF1 PE=1 SV=2	0.986	-0.0203404	-0.0297948	1.021	0.0299829	0.298379	0.134292	0.249214
P84095	Rho-related GTP-binding protein RhoG OS=Homo sapiens GN=RHOG PE=1 SV=1	0.976	-0.0350469	-0.129769	1.021	0.0299829	0.298379	0.0843053	0.118521
Q6PI78	Transmembrane protein 65 OS=Homo sapiens GN=TMEM65 PE=1 SV=2	0.965	-0.0513992	-0.240931	1.021	0.0299829	0.298379	0.0287244	0.0303789
Q6Y7W6	PERQ amino acid-rich with GYF domain-containing protein 2 OS=Homo sapiens GN=GIGYF2 PE=1 SV=1	0.96	-0.0588937	-0.291878	1.021	0.0299829	0.298379	0.00325061	0.00305582
P27348	14-3-3 protein theta OS=Homo sapiens GN=YWHAQ PE=1 SV=1	0.96	-0.0588937	-0.291878	1.021	0.0299829	0.298379	0.00325061	0.00305582
P69905	Hemoglobin subunit alpha OS=Homo sapiens GN=HBA1 PE=1 SV=2	0.957	-0.0634092	-0.322574	1.021	0.0299829	0.298379	-0.0120972	0.0109029
P56377	AP-1 complex subunit sigma-2 OS=Homo sapiens GN=AP1S2 PE=1 SV=1	0.856	-0.224317	-1.41642	1.021	0.0299829	0.298379	-0.55902	0.199162
Q6NXE6	Armadillo repeat-containing protein 6 OS=Homo sapiens GN=ARMC6 PE=1 SV=2	1.095	0.130931	0.998541	1.02	0.0285692	0.288896	0.643718	0.493888
P33897	ATP-binding cassette sub-family D member 1 OS=Homo sapiens GN=ABCD1 PE=1 SV=2	1.061	0.0854247	0.689191	1.02	0.0285692	0.288896	0.489044	0.606766
P60981	Destrin OS=Homo sapiens GN=DSTN PE=1 SV=3	1.053	0.0745054	0.614963	1.02	0.0285692	0.288896	0.451929	0.656769
P19338	Nucleolin OS=Homo sapiens GN=NCL PE=1 SV=3	1.047	0.0662614	0.558921	1.02	0.0285692	0.288896	0.423909	0.707094
Q5H9R7	Serine/threonine-protein phosphatase 6 regulatory subunit 3 OS=Homo sapiens GN=PPP6R3 PE=1 SV=2	1.034	0.0482362	0.436386	1.02	0.0285692	0.288896	0.362641	0.893745
P05455	Lupus La protein OS=Homo sapiens GN=SSB PE=1 SV=2	1.028	0.0398403	0.379311	1.02	0.0285692	0.288896	0.334103	1.06742
P49321	Nuclear autoantigenic sperm protein OS=Homo sapiens GN=NASP PE=1 SV=2	1.027	0.0384362	0.369766	1.02	0.0285692	0.288896	0.329331	1.10917
Q99729	Heterogeneous nuclear ribonucleoprotein A/B OS=Homo sapiens GN=HNRNPAB PE=1 SV=2	1.014	0.0200577	0.24483	1.02	0.0285692	0.288896	0.266863	1.28032
O00203	AP-3 complex subunit beta-1 OS=Homo sapiens GN=AP3B1 PE=1 SV=3	1.014	0.0200577	0.24483	1.02	0.0285692	0.288896	0.266863	1.28032
P05388	60S acidic ribosomal protein P0 OS=Homo sapiens GN=RPLP0 PE=1 SV=1	1.013	0.0186342	0.235153	1.02	0.0285692	0.288896	0.262025	1.18669
Q02218	2-oxoglutarate dehydrogenase, mitochondrial OS=Homo sapiens GN=OGDH PE=1 SV=3	1.012	0.0172093	0.225466	1.02	0.0285692	0.288896	0.257181	1.10728
Q9NNW7	Thioredoxin reductase 2, mitochondrial OS=Homo sapiens GN=TXNRD2 PE=1 SV=3	1.01	0.0143553	0.206065	1.02	0.0285692	0.288896	0.247481	0.976505
Q9HAB8	Phosphopantothenate--cysteine ligase OS=Homo sapiens GN=PPCS PE=1 SV=2	1.002	0.00288251	0.128074	1.02	0.0285692	0.288896	0.208485	0.630139
Q9NUY8	TBC1 domain family member 23 OS=Homo sapiens GN=TBC1D23 PE=1 SV=3	0.998	-0.00288828	0.0888445	1.02	0.0285692	0.288896	0.18887	0.508549
P34949	Mannose-6-phosphate isomerase OS=Homo sapiens GN=MPI PE=1 SV=2	0.997	-0.00433459	0.0790121	1.02	0.0285692	0.288896	0.183954	0.48143
Q9NQL2	Ras-related GTP-binding protein D OS=Homo sapiens GN=RRAGD PE=1 SV=1	0.967	-0.0484122	-0.220625	1.02	0.0285692	0.288896	0.0341354	0.0384819
Q15172	Serine/threonine-protein phosphatase 2A 56 kDa regulatory subunit alpha isoform OS=Homo sapiens GN=PPP2R5A PE=1 SV=1	0.853	-0.229382	-1.45085	1.02	0.0285692	0.288896	-0.580978	0.204031
Q9NY27	Serine/threonine-protein phosphatase 4 regulatory subunit 2 OS=Homo sapiens GN=PPP4R2 PE=1 SV=3	1.254	0.326537	2.32826	1.019	0.0271541	0.279405	1.30383	0.372669
Q9BUK6	Protein misato homolog 1 OS=Homo sapiens GN=MSTO1 PE=1 SV=1	1.055	0.077243	0.633572	1.019	0.0271541	0.279405	0.456488	0.627854
Q9NZI8	Insulin-like growth factor 2 mRNA-binding protein 1 OS=Homo sapiens GN=IGF2BP1 PE=1 SV=2	1.024	0.0342157	0.341076	1.019	0.0271541	0.279405	0.31024	1.20019
O43242	26S proteasome non-ATPase regulatory subunit 3 OS=Homo sapiens GN=PSMD3 PE=1 SV=2	1.004	0.00575927	0.147629	1.019	0.0271541	0.279405	0.213517	0.719996
Q05519	Serine/arginine-rich splicing factor 11 OS=Homo sapiens GN=SRSF11 PE=1 SV=1	1.002	0.00288251	0.128074	1.019	0.0271541	0.279405	0.203739	0.645162
P40818	Ubiquitin carboxyl-terminal hydrolase 8 OS=Homo sapiens GN=USP8 PE=1 SV=1	0.971	-0.0424568	-0.180141	1.019	0.0271541	0.279405	0.049632	0.0632009
O43678	NADH dehydrogenase [ubiquinone] 1 alpha subcomplex subunit 2 OS=Homo sapiens GN=NDUFA2 PE=1 SV=3	0.961	-0.0573917	-0.281667	1.019	0.0271541	0.279405	-0.00113124	0.00111631
Q04760	Lactoylglutathione lyase OS=Homo sapiens GN=GLO1 PE=1 SV=4	0.958	-0.0619024	-0.312331	1.019	0.0271541	0.279405	-0.0164634	0.0156472
P51809	Vesicle-associated membrane protein 7 OS=Homo sapiens GN=VAMP7 PE=1 SV=3	0.929	-0.106249	-0.6138	1.019	0.0271541	0.279405	-0.167198	0.112413
Q96DI7	U5 small nuclear ribonucleoprotein 40 kDa protein OS=Homo sapiens GN=SNRNP40 PE=1 SV=1	0.906	-0.142417	-0.859666	1.019	0.0271541	0.279405	-0.290131	0.154868
P52789	Hexokinase-2 OS=Homo sapiens GN=HK2 PE=1 SV=2	1.047	0.0662614	0.558921	1.018	0.0257376	0.269903	0.414412	0.670395
Q9HCC0	Methylcrotonoyl-CoA carboxylase beta chain, mitochondrial OS=Homo sapiens GN=MCCC2 PE=1 SV=1	1.046	0.0648829	0.549549	1.018	0.0257376	0.269903	0.409726	0.679098
Q01658	Protein Dr1 OS=Homo sapiens GN=DR1 PE=1 SV=1	1.045	0.0635029	0.540168	1.018	0.0257376	0.269903	0.405035	0.688238
Q9P289	Serine/threonine-protein kinase 26 OS=Homo sapiens GN=STK26 PE=1 SV=2	1.027	0.0384362	0.369766	1.018	0.0257376	0.269903	0.319834	1.00616
Q86TB9	Protein PAT1 homolog 1 OS=Homo sapiens GN=PATL1 PE=1 SV=2	1.01	0.0143553	0.206065	1.018	0.0257376	0.269903	0.237984	1.07121
P25705	ATP synthase subunit alpha, mitochondrial OS=Homo sapiens GN=ATP5A1 PE=1 SV=1	0.995	-0.00723157	0.0593188	1.018	0.0257376	0.269903	0.164611	0.440963
Q9UKV3	Apoptotic chromatin condensation inducer in the nucleus OS=Homo sapiens GN=ACIN1 PE=1 SV=2	0.983	-0.0247367	-0.0596804	1.018	0.0257376	0.269903	0.105111	0.194813
Q96HS1	Serine/threonine-protein phosphatase PGAM5, mitochondrial OS=Homo sapiens GN=PGAM5 PE=1 SV=2	0.975	-0.0365259	-0.139822	1.018	0.0257376	0.269903	0.0650401	0.0945861
Q96PK6	RNA-binding protein 14 OS=Homo sapiens GN=RBM14 PE=1 SV=2	0.975	-0.0365259	-0.139822	1.018	0.0257376	0.269903	0.0650401	0.0945861
O95425	Supervillin OS=Homo sapiens GN=SVIL PE=1 SV=2	0.973	-0.0394883	-0.159961	1.018	0.0257376	0.269903	0.0549707	0.0754128
Q9UJ70	N-acetyl-D-glucosamine kinase OS=Homo sapiens GN=NAGK PE=1 SV=4	0.95	-0.0740006	-0.394574	1.018	0.0257376	0.269903	-0.0623357	0.054567
Q6IBW4	Condensin-2 complex subunit H2 OS=Homo sapiens GN=NCAPH2 PE=1 SV=1	0.949	-0.07552	-0.404903	1.018	0.0257376	0.269903	-0.0675002	0.0583403
Q9ULH1	Arf-GAP with SH3 domain, ANK repeat and PH domain-containing protein 1 OS=Homo sapiens GN=ASAP1 PE=1 SV=4	0.939	-0.0908029	-0.508795	1.018	0.0257376	0.269903	-0.119446	0.0912484
Q92544	Transmembrane 9 superfamily member 4 OS=Homo sapiens GN=TM9SF4 PE=1 SV=2	0.936	-0.0954196	-0.540179	1.018	0.0257376	0.269903	-0.135138	0.0996379
Q9UNW1	Multiple inositol polyphosphate phosphatase 1 OS=Homo sapiens GN=MINPP1 PE=1 SV=1	0.934	-0.0985055	-0.561157	1.018	0.0257376	0.269903	-0.145627	0.104907
Q86YP4	Transcriptional repressor p66-alpha OS=Homo sapiens GN=GATAD2A PE=1 SV=1	0.929	-0.106249	-0.6138	1.018	0.0257376	0.269903	-0.171949	0.117057
P61457	Pterin-4-alpha-carbinolamine dehydratase OS=Homo sapiens GN=PCBD1 PE=1 SV=2	0.929	-0.106249	-0.6138	1.018	0.0257376	0.269903	-0.171949	0.117057
P24941	Cyclin-dependent kinase 2 OS=Homo sapiens GN=CDK2 PE=1 SV=2	0.924	-0.114035	-0.666727	1.018	0.0257376	0.269903	-0.198412	0.127915
Q96KM6	Zinc finger protein 512B OS=Homo sapiens GN=ZNF512B PE=1 SV=1	0.906	-0.142417	-0.859666	1.018	0.0257376	0.269903	-0.294882	0.158847
Q13952	Nuclear transcription factor Y subunit gamma OS=Homo sapiens GN=NFYC PE=1 SV=3	1.186	0.246104	1.78148	1.017	0.0243197	0.260391	1.02094	0.389763
Q969Z0	Protein TBRG4 OS=Homo sapiens GN=TBRG4 PE=1 SV=1	1.067	0.0935602	0.744497	1.017	0.0243197	0.260391	0.502444	0.54393
P61019	Ras-related protein Rab-2A OS=Homo sapiens GN=RAB2A PE=1 SV=1	1.062	0.0867838	0.698431	1.017	0.0243197	0.260391	0.479411	0.564131
P61224	Ras-related protein Rap-1b OS=Homo sapiens GN=RAP1B PE=1 SV=1	1.044	0.0621217	0.530779	1.017	0.0243197	0.260391	0.395585	0.678511
Q14997	Proteasome activator complex subunit 4 OS=Homo sapiens GN=PSME4 PE=1 SV=2	1.037	0.0524159	0.464799	1.017	0.0243197	0.260391	0.362595	0.757198
Q8TBC4	NEDD8-activating enzyme E1 catalytic subunit OS=Homo sapiens GN=UBA3 PE=1 SV=2	1.029	0.041243	0.388847	1.017	0.0243197	0.260391	0.324619	0.905344
Q14683	Structural maintenance of chromosomes protein 1A OS=Homo sapiens GN=SMC1A PE=1 SV=2	1.002	0.00288251	0.128074	1.017	0.0243197	0.260391	0.194232	0.67986
P52298	Nuclear cap-binding protein subunit 2 OS=Homo sapiens GN=NCBP2 PE=1 SV=1	1.001	0.00144197	0.118282	1.017	0.0243197	0.260391	0.189336	0.641002
O00233	26S proteasome non-ATPase regulatory subunit 9 OS=Homo sapiens GN=PSMD9 PE=1 SV=3	1	0	0.108479	1.017	0.0243197	0.260391	0.184435	0.604315
O60488	Long-chain-fatty-acid--CoA ligase 4 OS=Homo sapiens GN=ACSL4 PE=1 SV=2	0.998	-0.00288828	0.0888445	1.017	0.0243197	0.260391	0.174618	0.536596
Q96ST2	Protein IWS1 homolog OS=Homo sapiens GN=IWS1 PE=1 SV=2	0.982	-0.0262051	-0.0696623	1.017	0.0243197	0.260391	0.0953645	0.176254
O60508	Pre-mRNA-processing factor 17 OS=Homo sapiens GN=CDC40 PE=1 SV=1	0.975	-0.0365259	-0.139822	1.017	0.0243197	0.260391	0.0602844	0.0895269
Q8IX01	SURP and G-patch domain-containing protein 2 OS=Homo sapiens GN=SUGP2 PE=1 SV=2	0.966	-0.0499049	-0.230772	1.017	0.0243197	0.260391	0.0148094	0.0169802
Q9UNX4	WD repeat-containing protein 3 OS=Homo sapiens GN=WDR3 PE=1 SV=1	0.963	-0.0543923	-0.261278	1.017	0.0243197	0.260391	-0.000443235	0.000470076
Q9HBL0	Tensin-1 OS=Homo sapiens GN=TNS1 PE=1 SV=2	0.922	-0.117161	-0.687979	1.017	0.0243197	0.260391	-0.213794	0.136472
Q9H9Y6	DNA-directed RNA polymerase I subunit RPA2 OS=Homo sapiens GN=POLR1B PE=1 SV=2	0.909	-0.137648	-0.827245	1.017	0.0243197	0.260391	-0.283427	0.158554
Q15291	Retinoblastoma-binding protein 5 OS=Homo sapiens GN=RBBP5 PE=1 SV=2	0.902	-0.148801	-0.903061	1.017	0.0243197	0.260391	-0.321335	0.168311
Q9HCD5	Nuclear receptor coactivator 5 OS=Homo sapiens GN=NCOA5 PE=1 SV=2	1.132	0.178874	1.32446	1.016	0.0229004	0.250872	0.787664	0.419273
Q9UNQ0	ATP-binding cassette sub-family G member 2 OS=Homo sapiens GN=ABCG2 PE=1 SV=3	1.101	0.138814	1.05213	1.016	0.0229004	0.250872	0.651502	0.45471
P49915	GMP synthase [glutamine-hydrolyzing] OS=Homo sapiens GN=GMPS PE=1 SV=1	1.097	0.133564	1.01644	1.016	0.0229004	0.250872	0.633655	0.460985
Q9UJZ1	Stomatin-like protein 2, mitochondrial OS=Homo sapiens GN=STOML2 PE=1 SV=1	1.067	0.0935602	0.744497	1.016	0.0229004	0.250872	0.497684	0.533004
Q15424	Scaffold attachment factor B1 OS=Homo sapiens GN=SAFB PE=1 SV=4	1.067	0.0935602	0.744497	1.016	0.0229004	0.250872	0.497684	0.533004
Q9UBC2	Epidermal growth factor receptor substrate 15-like 1 OS=Homo sapiens GN=EPS15L1 PE=1 SV=1	1.057	0.0799754	0.652148	1.016	0.0229004	0.250872	0.45151	0.574774
Q9UJA5	tRNA (adenine(58)-N(1))-methyltransferase non-catalytic subunit TRM6 OS=Homo sapiens GN=TRMT6 PE=1 SV=1	1.043	0.0607392	0.52138	1.016	0.0229004	0.250872	0.386126	0.668581
P42285	Superkiller viralicidic activity 2-like 2 OS=Homo sapiens GN=SKIV2L2 PE=1 SV=3	1.04	0.0565835	0.493131	1.016	0.0229004	0.250872	0.372001	0.698101
Q92541	RNA polymerase-associated protein RTF1 homolog OS=Homo sapiens GN=RTF1 PE=1 SV=4	1.034	0.0482362	0.436386	1.016	0.0229004	0.250872	0.343629	0.775091
Q9P275	Ubiquitin carboxyl-terminal hydrolase 36 OS=Homo sapiens GN=USP36 PE=1 SV=3	1.03	0.0426443	0.398373	1.016	0.0229004	0.250872	0.324622	0.847043
Q08J23	tRNA (cytosine(34)-C(5))-methyltransferase OS=Homo sapiens GN=NSUN2 PE=1 SV=2	1.027	0.0384362	0.369766	1.016	0.0229004	0.250872	0.310319	0.919028
P14625	Endoplasmin OS=Homo sapiens GN=HSP90B1 PE=1 SV=1	1.027	0.0384362	0.369766	1.016	0.0229004	0.250872	0.310319	0.919028
Q5EBL4	RILP-like protein 1 OS=Homo sapiens GN=RILPL1 PE=1 SV=1	1.024	0.0342157	0.341076	1.016	0.0229004	0.250872	0.295974	1.0165
P11169	Solute carrier family 2, facilitated glucose transporter member 3 OS=Homo sapiens GN=SLC2A3 PE=1 SV=1	1.002	0.00288251	0.128074	1.016	0.0229004	0.250872	0.189473	0.700056
P10412	Histone H1.4 OS=Homo sapiens GN=HIST1H1E PE=1 SV=2	1.001	0.00144197	0.118282	1.016	0.0229004	0.250872	0.184577	0.658523
Q96FX7	tRNA (adenine(58)-N(1))-methyltransferase catalytic subunit TRMT61A OS=Homo sapiens GN=TRMT61A PE=1 SV=1	0.984	-0.0232698	-0.049708	1.016	0.0229004	0.250872	0.100582	0.204448
Q92597	Protein NDRG1 OS=Homo sapiens GN=NDRG1 PE=1 SV=1	0.972	-0.0409718	-0.170046	1.016	0.0229004	0.250872	0.040413	0.0559004
Q9H8H2	Probable ATP-dependent RNA helicase DDX31 OS=Homo sapiens GN=DDX31 PE=1 SV=2	0.962	-0.0558912	-0.271467	1.016	0.0229004	0.250872	-0.0102977	0.0110348
Q9Y2Q9	28S ribosomal protein S28, mitochondrial OS=Homo sapiens GN=MRPS28 PE=1 SV=1	0.958	-0.0619024	-0.312331	1.016	0.0229004	0.250872	-0.0307298	0.0311424
P31689	DnaJ homolog subfamily A member 1 OS=Homo sapiens GN=DNAJA1 PE=1 SV=2	0.948	-0.077041	-0.415243	1.016	0.0229004	0.250872	-0.0821855	0.0726378
O95379	Tumor necrosis factor alpha-induced protein 8 OS=Homo sapiens GN=TNFAIP8 PE=1 SV=1	1.244	0.314986	2.24974	1.015	0.0214797	0.241342	1.24554	0.36455
Q8N8A6	ATP-dependent RNA helicase DDX51 OS=Homo sapiens GN=DDX51 PE=1 SV=3	1.046	0.0648829	0.549549	1.015	0.0214797	0.241342	0.395445	0.626052
Q92841	Probable ATP-dependent RNA helicase DDX17 OS=Homo sapiens GN=DDX17 PE=1 SV=2	1.039	0.0551957	0.483696	1.015	0.0214797	0.241342	0.362519	0.687471
O14976	Cyclin-G-associated kinase OS=Homo sapiens GN=GAK PE=1 SV=2	1.029	0.041243	0.388847	1.015	0.0214797	0.241342	0.315094	0.834532
P49591	Serine--tRNA ligase, cytoplasmic OS=Homo sapiens GN=SARS PE=1 SV=3	1.022	0.0313952	0.321901	1.015	0.0214797	0.241342	0.281621	1.04363
Q32MZ4	Leucine-rich repeat flightless-interacting protein 1 OS=Homo sapiens GN=LRRFIP1 PE=1 SV=2	1.02	0.0285692	0.30269	1.015	0.0214797	0.241342	0.272016	1.14577
P36578	60S ribosomal protein L4 OS=Homo sapiens GN=RPL4 PE=1 SV=5	1.008	0.0114956	0.186626	1.015	0.0214797	0.241342	0.213984	1.09177
P29692	Elongation factor 1-delta OS=Homo sapiens GN=EEF1D PE=1 SV=5	1.006	0.00863031	0.167147	1.015	0.0214797	0.241342	0.204245	0.941639
P10909	Clusterin OS=Homo sapiens GN=CLU PE=1 SV=1	1.005	0.0071955	0.157393	1.015	0.0214797	0.241342	0.199367	0.879089
Q9Y6D6	Brefeldin A-inhibited guanine nucleotide-exchange protein 1 OS=Homo sapiens GN=ARFGEF1 PE=1 SV=2	1	0	0.108479	1.015	0.0214797	0.241342	0.17491	0.636243
Q14157	Ubiquitin-associated protein 2-like OS=Homo sapiens GN=UBAP2L PE=1 SV=2	0.992	-0.011588	0.029704	1.015	0.0214797	0.241342	0.135523	0.374649
Q9NSI2	Protein FAM207A OS=Homo sapiens GN=FAM207A PE=1 SV=2	0.976	-0.0350469	-0.129769	1.015	0.0214797	0.241342	0.0557864	0.0893353
Q9UBS4	DnaJ homolog subfamily B member 11 OS=Homo sapiens GN=DNAJB11 PE=1 SV=1	0.966	-0.0499049	-0.230772	1.015	0.0214797	0.241342	0.00528462	0.00623307
P07108	Acyl-CoA-binding protein OS=Homo sapiens GN=DBI PE=1 SV=2	0.957	-0.0634092	-0.322574	1.015	0.0214797	0.241342	-0.0406161	0.0414737
Q9Y371	Endophilin-B1 OS=Homo sapiens GN=SH3GLB1 PE=1 SV=1	0.94	-0.0892673	-0.498357	1.015	0.0214797	0.241342	-0.128507	0.103966
P0DN76	Splicing factor U2AF 35 kDa subunit-like protein OS=Homo sapiens GN=U2AF1L5 PE=3 SV=1	1.116	0.158337	1.18485	1.014	0.0200577	0.231803	0.708325	0.423653
Q6PCB6	Protein ABHD17C OS=Homo sapiens GN=ABHD17C PE=2 SV=2	1.101	0.138814	1.05213	1.014	0.0200577	0.231803	0.641968	0.441355
Q9Y2T3	Guanine deaminase OS=Homo sapiens GN=GDA PE=1 SV=1	1.076	0.105678	0.826873	1.014	0.0200577	0.231803	0.529338	0.486785
O43148	mRNA cap guanine-N7 methyltransferase OS=Homo sapiens GN=RNMT PE=1 SV=1	1.056	0.0786098	0.642865	1.014	0.0200577	0.231803	0.437334	0.553329
O00267	Transcription elongation factor SPT5 OS=Homo sapiens GN=SUPT5H PE=1 SV=1	1.034	0.0482362	0.436386	1.014	0.0200577	0.231803	0.334095	0.723199
Q14146	Unhealthy ribosome biogenesis protein 2 homolog OS=Homo sapiens GN=URB2 PE=2 SV=2	1.033	0.0468403	0.426896	1.014	0.0200577	0.231803	0.32935	0.736806
Q6WCQ1	Myosin phosphatase Rho-interacting protein OS=Homo sapiens GN=MPRIP PE=1 SV=3	1.019	0.0271541	0.293071	1.014	0.0200577	0.231803	0.262437	1.1309
Q8N3X1	Formin-binding protein 4 OS=Homo sapiens GN=FNBP4 PE=1 SV=3	1.018	0.0257376	0.283441	1.014	0.0200577	0.231803	0.257622	1.19661
Q8N806	Putative E3 ubiquitin-protein ligase UBR7 OS=Homo sapiens GN=UBR7 PE=1 SV=2	1.002	0.00288251	0.128074	1.014	0.0200577	0.231803	0.179938	0.747985
Q06265	Exosome complex component RRP45 OS=Homo sapiens GN=EXOSC9 PE=1 SV=3	0.996	-0.00578235	0.0691704	1.014	0.0200577	0.231803	0.150487	0.501156
Q5VW32	BRO1 domain-containing protein BROX OS=Homo sapiens GN=BROX PE=1 SV=1	0.978	-0.0320936	-0.109693	1.014	0.0200577	0.231803	0.0610554	0.107138
Q9NQG5	Regulation of nuclear pre-mRNA domain-containing protein 1B OS=Homo sapiens GN=RPRD1B PE=1 SV=1	0.975	-0.0365259	-0.139822	1.014	0.0200577	0.231803	0.0459905	0.0728686
P52294	Importin subunit alpha-5 OS=Homo sapiens GN=KPNA1 PE=1 SV=3	0.975	-0.0365259	-0.139822	1.014	0.0200577	0.231803	0.0459905	0.0728686
Q92688	Acidic leucine-rich nuclear phosphoprotein 32 family member B OS=Homo sapiens GN=ANP32B PE=1 SV=1	0.968	-0.046921	-0.210489	1.014	0.0200577	0.231803	0.0106574	0.0135221
Q9P2R7	Succinyl-CoA ligase [ADP-forming] subunit beta, mitochondrial OS=Homo sapiens GN=SUCLA2 PE=1 SV=3	0.967	-0.0484122	-0.220625	1.014	0.0200577	0.231803	0.00558906	0.00688386
P09132	Signal recognition particle 19 kDa protein OS=Homo sapiens GN=SRP19 PE=1 SV=3	0.958	-0.0619024	-0.312331	1.014	0.0200577	0.231803	-0.040264	0.0426495
Q12972	Nuclear inhibitor of protein phosphatase 1 OS=Homo sapiens GN=PPP1R8 PE=1 SV=2	0.957	-0.0634092	-0.322574	1.014	0.0200577	0.231803	-0.0453852	0.0473623
Q03701	CCAAT/enhancer-binding protein zeta OS=Homo sapiens GN=CEBPZ PE=1 SV=3	0.954	-0.0679388	-0.353366	1.014	0.0200577	0.231803	-0.0607815	0.0606788
Q4G0J3	La-related protein 7 OS=Homo sapiens GN=LARP7 PE=1 SV=1	0.946	-0.0800879	-0.435956	1.014	0.0200577	0.231803	-0.102076	0.0909186
Q9NVT9	Armadillo repeat-containing protein 1 OS=Homo sapiens GN=ARMC1 PE=1 SV=1	0.945	-0.0816138	-0.446328	1.014	0.0200577	0.231803	-0.107262	0.0942317
P55196	Afadin OS=Homo sapiens GN=MLLT4 PE=1 SV=3	0.945	-0.0816138	-0.446328	1.014	0.0200577	0.231803	-0.107262	0.0942317
Q9P0P0	E3 ubiquitin-protein ligase RNF181 OS=Homo sapiens GN=RNF181 PE=1 SV=1	0.929	-0.106249	-0.6138	1.014	0.0200577	0.231803	-0.190999	0.136749
P82970	High mobility group nucleosome-binding domain-containing protein 5 OS=Homo sapiens GN=HMGN5 PE=1 SV=1	0.835	-0.260152	-1.66002	1.014	0.0200577	0.231803	-0.714109	0.230382
Q9Y5B6	PAX3- and PAX7-binding protein 1 OS=Homo sapiens GN=PAXBP1 PE=1 SV=2	1.178	0.23634	1.7151	1.013	0.0186342	0.222254	0.968679	0.378866
Q02040	A-kinase anchor protein 17A OS=Homo sapiens GN=AKAP17A PE=1 SV=2	1.133	0.180148	1.33312	1.013	0.0186342	0.222254	0.777685	0.403589
Q9BUQ8	Probable ATP-dependent RNA helicase DDX23 OS=Homo sapiens GN=DDX23 PE=1 SV=3	1.055	0.077243	0.633572	1.013	0.0186342	0.222254	0.427913	0.544828
Q8WXF1	Paraspeckle component 1 OS=Homo sapiens GN=PSPC1 PE=1 SV=1	1.055	0.077243	0.633572	1.013	0.0186342	0.222254	0.427913	0.544828
P18887	DNA repair protein XRCC1 OS=Homo sapiens GN=XRCC1 PE=1 SV=2	1.036	0.051024	0.455338	1.013	0.0186342	0.222254	0.338796	0.675888
P05166	Propionyl-CoA carboxylase beta chain, mitochondrial OS=Homo sapiens GN=PCCB PE=1 SV=3	1.019	0.0271541	0.293071	1.013	0.0186342	0.222254	0.257663	1.06078
Q13200	26S proteasome non-ATPase regulatory subunit 2 OS=Homo sapiens GN=PSMD2 PE=1 SV=3	1.016	0.0229004	0.264155	1.013	0.0186342	0.222254	0.243205	1.26198
O60524	Nuclear export mediator factor NEMF OS=Homo sapiens GN=NEMF PE=1 SV=4	0.979	-0.0306192	-0.0996698	1.013	0.0186342	0.222254	0.0612924	0.114426
P50336	Protoporphyrinogen oxidase OS=Homo sapiens GN=PPOX PE=1 SV=1	0.954	-0.0679388	-0.353366	1.013	0.0186342	0.222254	-0.065556	0.0668031
Q99615	DnaJ homolog subfamily C member 7 OS=Homo sapiens GN=DNAJC7 PE=1 SV=2	1.061	0.0854247	0.689191	1.012	0.0172093	0.212696	0.450944	0.509435
Q15014	Mortality factor 4-like protein 2 OS=Homo sapiens GN=MORF4L2 PE=1 SV=1	1.055	0.077243	0.633572	1.012	0.0172093	0.212696	0.423134	0.531938
O96008	Mitochondrial import receptor subunit TOM40 homolog OS=Homo sapiens GN=TOMM40 PE=1 SV=1	1.027	0.0384362	0.369766	1.012	0.0172093	0.212696	0.291231	0.775505
Q00059	Transcription factor A, mitochondrial OS=Homo sapiens GN=TFAM PE=1 SV=1	1.019	0.0271541	0.293071	1.012	0.0172093	0.212696	0.252884	0.998567
Q16181	Septin-7 OS=Homo sapiens GN=SEPT7 PE=1 SV=2	1.017	0.0243197	0.273802	1.012	0.0172093	0.212696	0.243249	1.09939
Q96TC7	Regulator of microtubule dynamics protein 3 OS=Homo sapiens GN=RMDN3 PE=1 SV=2	1.017	0.0243197	0.273802	1.012	0.0172093	0.212696	0.243249	1.09939
P55072	Transitional endoplasmic reticulum ATPase OS=Homo sapiens GN=VCP PE=1 SV=4	1.007	0.0100637	0.176891	1.012	0.0172093	0.212696	0.194794	1.23399
O43237	Cytoplasmic dynein 1 light intermediate chain 2 OS=Homo sapiens GN=DYNC1LI2 PE=1 SV=1	1	0	0.108479	1.012	0.0172093	0.212696	0.160587	0.699509
Q14814	Myocyte-specific enhancer factor 2D OS=Homo sapiens GN=MEF2D PE=1 SV=1	0.993	-0.0101344	0.0395853	1.012	0.0172093	0.212696	0.126141	0.416963
P15170	Eukaryotic peptide chain release factor GTP-binding subunit ERF3A OS=Homo sapiens GN=GSPT1 PE=1 SV=1	0.984	-0.0232698	-0.049708	1.012	0.0172093	0.212696	0.0814941	0.189662
O60341	Lysine-specific histone demethylase 1A OS=Homo sapiens GN=KDM1A PE=1 SV=2	0.983	-0.0247367	-0.0596804	1.012	0.0172093	0.212696	0.0765079	0.171243
P50416	Carnitine O-palmitoyltransferase 1, liver isoform OS=Homo sapiens GN=CPT1A PE=1 SV=2	0.973	-0.0394883	-0.159961	1.012	0.0172093	0.212696	0.0263676	0.0407175
A6NHR9	Structural maintenance of chromosomes flexible hinge domain-containing protein 1 OS=Homo sapiens GN=SMCHD1 PE=1 SV=2	0.962	-0.0558912	-0.271467	1.012	0.0172093	0.212696	-0.0293854	0.0347516
P30086	Phosphatidylethanolamine-binding protein 1 OS=Homo sapiens GN=PEBP1 PE=1 SV=3	0.954	-0.0679388	-0.353366	1.012	0.0172093	0.212696	-0.0703351	0.0731757
Q9Y223	Bifunctional UDP-N-acetylglucosamine 2-epimerase/N-acetylmannosamine kinase OS=Homo sapiens GN=GNE PE=1 SV=1	0.944	-0.0831412	-0.456712	1.012	0.0172093	0.212696	-0.122008	0.109318
Q92696	Geranylgeranyl transferase type-2 subunit alpha OS=Homo sapiens GN=RABGGTA PE=1 SV=2	0.943	-0.0846703	-0.467106	1.012	0.0172093	0.212696	-0.127205	0.11237
P22570	NADPH:adrenodoxin oxidoreductase, mitochondrial OS=Homo sapiens GN=FDXR PE=1 SV=3	0.923	-0.115597	-0.677348	1.012	0.0172093	0.212696	-0.232326	0.158828
Q96IU4	Protein ABHD14B OS=Homo sapiens GN=ABHD14B PE=1 SV=1	0.901	-0.150401	-0.91394	1.012	0.0172093	0.212696	-0.350622	0.190059
Q8IYB8	ATP-dependent RNA helicase SUPV3L1, mitochondrial OS=Homo sapiens GN=SUPV3L1 PE=1 SV=1	1.079	0.109695	0.854179	1.011	0.015783	0.20313	0.528654	0.454237
Q15276	Rab GTPase-binding effector protein 1 OS=Homo sapiens GN=RABEP1 PE=1 SV=2	1.066	0.0922074	0.7353	1.011	0.015783	0.20313	0.469215	0.483582
Q9P2R3	Rabankyrin-5 OS=Homo sapiens GN=ANKFY1 PE=1 SV=2	1.056	0.0786098	0.642865	1.011	0.015783	0.20313	0.422997	0.515467
Q7Z460	CLIP-associating protein 1 OS=Homo sapiens GN=CLASP1 PE=1 SV=1	1.041	0.0579701	0.502557	1.011	0.015783	0.20313	0.352843	0.592669
P62979	Ubiquitin-40S ribosomal protein S27a OS=Homo sapiens GN=RPS27A PE=1 SV=2	1.019	0.0271541	0.293071	1.011	0.015783	0.20313	0.2481	0.942507
Q14676	Mediator of DNA damage checkpoint protein 1 OS=Homo sapiens GN=MDC1 PE=1 SV=3	1.005	0.0071955	0.157393	1.011	0.015783	0.20313	0.180261	1.09511
P38919	Eukaryotic initiation factor 4A-III OS=Homo sapiens GN=EIF4A3 PE=1 SV=4	0.995	-0.00723157	0.0593188	1.011	0.015783	0.20313	0.131224	0.496044
P17655	Calpain-2 catalytic subunit OS=Homo sapiens GN=CAPN2 PE=1 SV=6	0.992	-0.011588	0.029704	1.011	0.015783	0.20313	0.116417	0.389807
Q6NXT1	Ankyrin repeat domain-containing protein 54 OS=Homo sapiens GN=ANKRD54 PE=1 SV=2	0.989	-0.0159576	0	1.011	0.015783	0.20313	0.101565	0.30103
P49721	Proteasome subunit beta type-2 OS=Homo sapiens GN=PSMB2 PE=1 SV=1	0.976	-0.0350469	-0.129769	1.011	0.015783	0.20313	0.0366804	0.0645355
Q8WWM7	Ataxin-2-like protein OS=Homo sapiens GN=ATXN2L PE=1 SV=2	0.968	-0.046921	-0.210489	1.011	0.015783	0.20313	-0.00367946	0.00494657
Q9P016	Thymocyte nuclear protein 1 OS=Homo sapiens GN=THYN1 PE=1 SV=1	0.966	-0.0499049	-0.230772	1.011	0.015783	0.20313	-0.0138214	0.0179562
Q9H6U8	Alpha-1,2-mannosyltransferase ALG9 OS=Homo sapiens GN=ALG9 PE=1 SV=2	0.945	-0.0816138	-0.446328	1.011	0.015783	0.20313	-0.121599	0.11244
Q8N6T3	ADP-ribosylation factor GTPase-activating protein 1 OS=Homo sapiens GN=ARFGAP1 PE=1 SV=2	0.937	-0.093879	-0.529707	1.011	0.015783	0.20313	-0.163289	0.134826
Q99707	Methionine synthase OS=Homo sapiens GN=MTR PE=1 SV=2	0.907	-0.140826	-0.848847	1.011	0.015783	0.20313	-0.322859	0.1874
Q9GZT8	NIF3-like protein 1 OS=Homo sapiens GN=NIF3L1 PE=1 SV=2	0.894	-0.161653	-0.990433	1.011	0.015783	0.20313	-0.393652	0.201502
O60220	Mitochondrial import inner membrane translocase subunit Tim8 A OS=Homo sapiens GN=TIMM8A PE=1 SV=1	1.091	0.125651	0.962649	1.01	0.0143553	0.193552	0.578101	0.427496
Q9NR45	Sialic acid synthase OS=Homo sapiens GN=NANS PE=1 SV=2	1.027	0.0384362	0.369766	1.01	0.0143553	0.193552	0.281659	0.714434
P62917	60S ribosomal protein L8 OS=Homo sapiens GN=RPL8 PE=1 SV=2	1.018	0.0257376	0.283441	1.01	0.0143553	0.193552	0.238497	0.92599
Q96N67	Dedicator of cytokinesis protein 7 OS=Homo sapiens GN=DOCK7 PE=1 SV=4	0.998	-0.00288828	0.0888445	1.01	0.0143553	0.193552	0.141198	0.645808
P98082	Disabled homolog 2 OS=Homo sapiens GN=DAB2 PE=1 SV=3	0.994	-0.00868224	0.0494573	1.01	0.0143553	0.193552	0.121505	0.467582
Q96EB6	NAD-dependent protein deacetylase sirtuin-1 OS=Homo sapiens GN=SIRT1 PE=1 SV=2	0.987	-0.018878	-0.0198533	1.01	0.0143553	0.193552	0.0868495	0.247896
P08174	Complement decay-accelerating factor OS=Homo sapiens GN=CD55 PE=1 SV=4	0.985	-0.0218044	-0.0397463	1.01	0.0143553	0.193552	0.076903	0.201392
P09497	Clathrin light chain B OS=Homo sapiens GN=CLTB PE=1 SV=1	0.964	-0.0528949	-0.251099	1.01	0.0143553	0.193552	-0.0287733	0.0371268
Q9UBV2	Protein sel-1 homolog 1 OS=Homo sapiens GN=SEL1L PE=1 SV=3	0.914	-0.129734	-0.773447	1.01	0.0143553	0.193552	-0.289947	0.183026
P28715	DNA repair protein complementing XP-G cells OS=Homo sapiens GN=ERCC5 PE=1 SV=3	0.883	-0.179515	-1.11185	1.01	0.0143553	0.193552	-0.459151	0.214867
Q15833	Syntaxin-binding protein 2 OS=Homo sapiens GN=STXBP2 PE=1 SV=2	1.087	0.120352	0.926626	1.009	0.0129262	0.183966	0.555296	0.4257
Q7Z739	YTH domain-containing family protein 3 OS=Homo sapiens GN=YTHDF3 PE=1 SV=1	1.071	0.0989585	0.781194	1.009	0.0129262	0.183966	0.48258	0.452517
Q9H3Z4	DnaJ homolog subfamily C member 5 OS=Homo sapiens GN=DNAJC5 PE=1 SV=1	1.069	0.0962619	0.762862	1.009	0.0129262	0.183966	0.473414	0.456734
P46782	40S ribosomal protein S5 OS=Homo sapiens GN=RPS5 PE=1 SV=4	1.067	0.0935602	0.744497	1.009	0.0129262	0.183966	0.464231	0.4612
Q9Y2G5	GDP-fucose protein O-fucosyltransferase 2 OS=Homo sapiens GN=POFUT2 PE=1 SV=3	1.061	0.0854247	0.689191	1.009	0.0129262	0.183966	0.436579	0.476333
Q96AC1	Fermitin family homolog 2 OS=Homo sapiens GN=FERMT2 PE=1 SV=1	1.055	0.077243	0.633572	1.009	0.0129262	0.183966	0.408769	0.494719
O95989	Diphosphoinositol polyphosphate phosphohydrolase 1 OS=Homo sapiens GN=NUDT3 PE=1 SV=1	1.044	0.0621217	0.530779	1.009	0.0129262	0.183966	0.357373	0.541213
Q16891	MICOS complex subunit MIC60 OS=Homo sapiens GN=IMMT PE=1 SV=1	1.037	0.0524159	0.464799	1.009	0.0129262	0.183966	0.324382	0.584906
O95817	BAG family molecular chaperone regulator 3 OS=Homo sapiens GN=BAG3 PE=1 SV=3	1.019	0.0271541	0.293071	1.009	0.0129262	0.183966	0.238518	0.844232
P49792	E3 SUMO-protein ligase RanBP2 OS=Homo sapiens GN=RANBP2 PE=1 SV=2	0.995	-0.00723157	0.0593188	1.009	0.0129262	0.183966	0.121642	0.520819
P07947	Tyrosine-protein kinase Yes OS=Homo sapiens GN=YES1 PE=1 SV=3	0.986	-0.0203404	-0.0297948	1.009	0.0129262	0.183966	0.0770855	0.220246
Q7L014	Probable ATP-dependent RNA helicase DDX46 OS=Homo sapiens GN=DDX46 PE=1 SV=2	0.984	-0.0232698	-0.049708	1.009	0.0129262	0.183966	0.0671289	0.175221
Q14320	Protein FAM50A OS=Homo sapiens GN=FAM50A PE=1 SV=2	0.98	-0.0291463	-0.0896567	1.009	0.0129262	0.183966	0.0471545	0.103091
Q6PK04	Coiled-coil domain-containing protein 137 OS=Homo sapiens GN=CCDC137 PE=1 SV=1	0.978	-0.0320936	-0.109693	1.009	0.0129262	0.183966	0.0371366	0.0745378
Q9BTA9	WW domain-containing adapter protein with coiled-coil OS=Homo sapiens GN=WAC PE=1 SV=3	0.973	-0.0394883	-0.159961	1.009	0.0129262	0.183966	0.0120023	0.0197064
Q12800	Alpha-globin transcription factor CP2 OS=Homo sapiens GN=TFCP2 PE=1 SV=2	0.939	-0.0908029	-0.508795	1.009	0.0129262	0.183966	-0.162415	0.142142
P20290	Transcription factor BTF3 OS=Homo sapiens GN=BTF3 PE=1 SV=1	0.936	-0.0954196	-0.540179	1.009	0.0129262	0.183966	-0.178107	0.149374
Q86V81	THO complex subunit 4 OS=Homo sapiens GN=ALYREF PE=1 SV=3	0.92	-0.120294	-0.709276	1.009	0.0129262	0.183966	-0.262655	0.17943
Q96EK9	Protein KTI12 homolog OS=Homo sapiens GN=KTI12 PE=1 SV=1	0.766	-0.384584	-2.5059	1.009	0.0129262	0.183966	-1.16097	0.262289
Q9GZR2	RNA exonuclease 4 OS=Homo sapiens GN=REXO4 PE=1 SV=2	1.093	0.128293	0.980612	1.008	0.0114956	0.174371	0.577491	0.411204
Q9BXW7	Cat eye syndrome critical region protein 5 OS=Homo sapiens GN=CECR5 PE=1 SV=1	1.042	0.0593553	0.511974	1.008	0.0114956	0.174371	0.343172	0.536075
Q9NZD8	Maspardin OS=Homo sapiens GN=SPG21 PE=1 SV=1	1.035	0.0496308	0.445866	1.008	0.0114956	0.174371	0.310118	0.580588
Q8WX93	Palladin OS=Homo sapiens GN=PALLD PE=1 SV=3	1.027	0.0384362	0.369766	1.008	0.0114956	0.174371	0.272068	0.658614
O43865	Adenosylhomocysteinase 2 OS=Homo sapiens GN=AHCYL1 PE=1 SV=2	1.027	0.0384362	0.369766	1.008	0.0114956	0.174371	0.272068	0.658614
Q96FW1	Ubiquitin thioesterase OTUB1 OS=Homo sapiens GN=OTUB1 PE=1 SV=2	1.024	0.0342157	0.341076	1.008	0.0114956	0.174371	0.257723	0.700851
Q9Y5X1	Sorting nexin-9 OS=Homo sapiens GN=SNX9 PE=1 SV=1	1.02	0.0285692	0.30269	1.008	0.0114956	0.174371	0.23853	0.77656
O75083	WD repeat-containing protein 1 OS=Homo sapiens GN=WDR1 PE=1 SV=4	1.016	0.0229004	0.264155	1.008	0.0114956	0.174371	0.219263	0.890876
Q9BXS6	Nucleolar and spindle-associated protein 1 OS=Homo sapiens GN=NUSAP1 PE=1 SV=1	1.004	0.00575927	0.147629	1.008	0.0114956	0.174371	0.161	1.27779
Q8TC07	TBC1 domain family member 15 OS=Homo sapiens GN=TBC1D15 PE=1 SV=2	0.997	-0.00433459	0.0790121	1.008	0.0114956	0.174371	0.126691	0.639882
Q96SB4	SRSF protein kinase 1 OS=Homo sapiens GN=SRPK1 PE=1 SV=2	0.997	-0.00433459	0.0790121	1.008	0.0114956	0.174371	0.126691	0.639882
P82650	28S ribosomal protein S22, mitochondrial OS=Homo sapiens GN=MRPS22 PE=1 SV=1	0.995	-0.00723157	0.0593188	1.008	0.0114956	0.174371	0.116845	0.535737
Q13564	NEDD8-activating enzyme E1 regulatory subunit OS=Homo sapiens GN=NAE1 PE=1 SV=1	0.98	-0.0291463	-0.0896567	1.008	0.0114956	0.174371	0.042357	0.0956391
Q8WXH0	Nesprin-2 OS=Homo sapiens GN=SYNE2 PE=1 SV=3	0.976	-0.0350469	-0.129769	1.008	0.0114956	0.174371	0.0223009	0.0422487
Q13641	Trophoblast glycoprotein OS=Homo sapiens GN=TPBG PE=1 SV=1	0.972	-0.0409718	-0.170046	1.008	0.0114956	0.174371	0.00216252	0.0034857
O00567	Nucleolar protein 56 OS=Homo sapiens GN=NOP56 PE=1 SV=4	0.954	-0.0679388	-0.353366	1.008	0.0114956	0.174371	-0.0894979	0.101371
P42892	Endothelin-converting enzyme 1 OS=Homo sapiens GN=ECE1 PE=1 SV=2	0.858	-0.22095	-1.39353	1.008	0.0114956	0.174371	-0.609581	0.237136
Q4VC31	Coiled-coil domain-containing protein 58 OS=Homo sapiens GN=CCDC58 PE=1 SV=1	1.312	0.391768	2.7717	1.007	0.0100637	0.164765	1.46823	0.33517
P14866	Heterogeneous nuclear ribonucleoprotein L OS=Homo sapiens GN=HNRNPL PE=1 SV=2	1.069	0.0962619	0.762862	1.007	0.0100637	0.164765	0.463814	0.438206
Q12996	Cleavage stimulation factor subunit 3 OS=Homo sapiens GN=CSTF3 PE=1 SV=1	1.039	0.0551957	0.483696	1.007	0.0100637	0.164765	0.324231	0.536119
O75116	Rho-associated protein kinase 2 OS=Homo sapiens GN=ROCK2 PE=1 SV=4	1.02	0.0285692	0.30269	1.007	0.0100637	0.164765	0.233728	0.738367
Q8WUX9	Charged multivesicular body protein 7 OS=Homo sapiens GN=CHMP7 PE=1 SV=1	1.017	0.0243197	0.273802	1.007	0.0100637	0.164765	0.219284	0.809298
O75146	Huntingtin-interacting protein 1-related protein OS=Homo sapiens GN=HIP1R PE=1 SV=2	1	0	0.108479	1.007	0.0100637	0.164765	0.136622	0.8883
P62753	40S ribosomal protein S6 OS=Homo sapiens GN=RPS6 PE=1 SV=1	0.999	-0.00144342	0.0986665	1.007	0.0100637	0.164765	0.131716	0.805471
Q567U6	Coiled-coil domain-containing protein 93 OS=Homo sapiens GN=CCDC93 PE=1 SV=2	0.992	-0.011588	0.029704	1.007	0.0100637	0.164765	0.0972345	0.412907
O00161	Synaptosomal-associated protein 23 OS=Homo sapiens GN=SNAP23 PE=1 SV=1	0.985	-0.0218044	-0.0397463	1.007	0.0100637	0.164765	0.0625093	0.186624
Q14108	Lysosome membrane protein 2 OS=Homo sapiens GN=SCARB2 PE=1 SV=2	0.983	-0.0247367	-0.0596804	1.007	0.0100637	0.164765	0.0525423	0.141923
P49959	Double-strand break repair protein MRE11A OS=Homo sapiens GN=MRE11A PE=1 SV=3	0.978	-0.0320936	-0.109693	1.007	0.0100637	0.164765	0.0275362	0.0585231
Q9NVC6	Mediator of RNA polymerase II transcription subunit 17 OS=Homo sapiens GN=MED17 PE=1 SV=2	0.955	-0.0664274	-0.343092	1.007	0.0100637	0.164765	-0.0891634	0.105118
O75947	ATP synthase subunit d, mitochondrial OS=Homo sapiens GN=ATP5H PE=1 SV=3	0.951	-0.0724828	-0.384256	1.007	0.0100637	0.164765	-0.109746	0.1204
Q6RFH5	WD repeat-containing protein 74 OS=Homo sapiens GN=WDR74 PE=1 SV=1	1.14	0.189034	1.39352	1.006	0.00863031	0.155151	0.774336	0.367127
Q99798	Aconitate hydratase, mitochondrial OS=Homo sapiens GN=ACO2 PE=1 SV=2	1.088	0.121679	0.935644	1.006	0.00863031	0.155151	0.545398	0.402979
Q96RU3	Formin-binding protein 1 OS=Homo sapiens GN=FNBP1 PE=1 SV=2	1.082	0.1137	0.88141	1.006	0.00863031	0.155151	0.51828	0.409967
O14647	Chromodomain-helicase-DNA-binding protein 2 OS=Homo sapiens GN=CHD2 PE=1 SV=2	1.078	0.108357	0.845085	1.006	0.00863031	0.155151	0.500118	0.415206
Q12849	G-rich sequence factor 1 OS=Homo sapiens GN=GRSF1 PE=1 SV=3	1.06	0.0840643	0.679943	1.006	0.00863031	0.155151	0.417547	0.447113
Q93009	Ubiquitin carboxyl-terminal hydrolase 7 OS=Homo sapiens GN=USP7 PE=1 SV=2	1.044	0.0621217	0.530779	1.006	0.00863031	0.155151	0.342965	0.49627
O60344	Endothelin-converting enzyme 2 OS=Homo sapiens GN=ECE2 PE=1 SV=4	1.042	0.0593553	0.511974	1.006	0.00863031	0.155151	0.333562	0.504905
P62070	Ras-related protein R-Ras2 OS=Homo sapiens GN=RRAS2 PE=1 SV=1	1.029	0.041243	0.388847	1.006	0.00863031	0.155151	0.271999	0.587859
Q9HAV4	Exportin-5 OS=Homo sapiens GN=XPO5 PE=1 SV=1	1.025	0.0356239	0.350648	1.006	0.00863031	0.155151	0.252899	0.6293
P31946	14-3-3 protein beta/alpha OS=Homo sapiens GN=YWHAB PE=1 SV=3	1.019	0.0271541	0.293071	1.006	0.00863031	0.155151	0.224111	0.72116
P49419	Alpha-aminoadipic semialdehyde dehydrogenase OS=Homo sapiens GN=ALDH7A1 PE=1 SV=5	1.016	0.0229004	0.264155	1.006	0.00863031	0.155151	0.209653	0.790716
P37837	Transaldolase OS=Homo sapiens GN=TALDO1 PE=1 SV=2	1.015	0.0214797	0.254497	1.006	0.00863031	0.155151	0.204824	0.819685
O00429	Dynamin-1-like protein OS=Homo sapiens GN=DNM1L PE=1 SV=2	0.998	-0.00288828	0.0888445	1.006	0.00863031	0.155151	0.121998	0.77231
P33992	DNA replication licensing factor MCM5 OS=Homo sapiens GN=MCM5 PE=1 SV=5	0.998	-0.00288828	0.0888445	1.006	0.00863031	0.155151	0.121998	0.77231
Q70UQ0	Inhibitor of nuclear factor kappa-B kinase-interacting protein OS=Homo sapiens GN=IKBIP PE=1 SV=1	0.987	-0.018878	-0.0198533	1.006	0.00863031	0.155151	0.0676488	0.235807
Q96C86	m7GpppX diphosphatase OS=Homo sapiens GN=DCPS PE=1 SV=2	0.982	-0.0262051	-0.0696623	1.006	0.00863031	0.155151	0.0427443	0.114262
Q92925	SWI/SNF-related matrix-associated actin-dependent regulator of chromatin subfamily D member 2 OS=Homo sapiens GN=SMARCD2 PE=1 SV=3	0.975	-0.0365259	-0.139822	1.006	0.00863031	0.155151	0.00766425	0.0145972
P20339	Ras-related protein Rab-5A OS=Homo sapiens GN=RAB5A PE=1 SV=2	0.925	-0.112475	-0.656119	1.006	0.00863031	0.155151	-0.250484	0.188543
Q7L2H7	Eukaryotic translation initiation factor 3 subunit M OS=Homo sapiens GN=EIF3M PE=1 SV=1	0.92	-0.120294	-0.709276	1.006	0.00863031	0.155151	-0.277062	0.195794
P49750	YLP motif-containing protein 1 OS=Homo sapiens GN=YLPM1 PE=1 SV=3	0.863	-0.212568	-1.33655	1.006	0.00863031	0.155151	-0.590698	0.241412
Q13951	Core-binding factor subunit beta OS=Homo sapiens GN=CBFB PE=1 SV=2	1.148	0.199123	1.46211	1.005	0.0071955	0.145526	0.803816	0.359674
Q16539	Mitogen-activated protein kinase 14 OS=Homo sapiens GN=MAPK14 PE=1 SV=3	1.094	0.129613	0.98958	1.005	0.0071955	0.145526	0.567553	0.390357
P11279	Lysosome-associated membrane glycoprotein 1 OS=Homo sapiens GN=LAMP1 PE=1 SV=3	1.05	0.0703893	0.586982	1.005	0.0071955	0.145526	0.366254	0.46182
Q8N8S7	Protein enabled homolog OS=Homo sapiens GN=ENAH PE=1 SV=2	1.021	0.0299829	0.312301	1.005	0.0071955	0.145526	0.228914	0.652878
O43913	Origin recognition complex subunit 5 OS=Homo sapiens GN=ORC5 PE=1 SV=1	1.02	0.0285692	0.30269	1.005	0.0071955	0.145526	0.224108	0.66817
Q7L2E3	Putative ATP-dependent RNA helicase DHX30 OS=Homo sapiens GN=DHX30 PE=1 SV=1	0.998	-0.00288828	0.0888445	1.005	0.0071955	0.145526	0.117185	0.820841
P34897	Serine hydroxymethyltransferase, mitochondrial OS=Homo sapiens GN=SHMT2 PE=1 SV=3	0.993	-0.0101344	0.0395853	1.005	0.0071955	0.145526	0.0925557	0.480276
P31350	Ribonucleoside-diphosphate reductase subunit M2 OS=Homo sapiens GN=RRM2 PE=1 SV=1	0.979	-0.0306192	-0.0996698	1.005	0.0071955	0.145526	0.0229281	0.0543838
Q9P0W2	SWI/SNF-related matrix-associated actin-dependent regulator of chromatin subfamily E member 1-related OS=Homo sapiens GN=HMG20B PE=1 SV=1	0.976	-0.0350469	-0.129769	1.005	0.0071955	0.145526	0.00787862	0.0161027
Q13868	Exosome complex component RRP4 OS=Homo sapiens GN=EXOSC2 PE=1 SV=2	0.976	-0.0350469	-0.129769	1.005	0.0071955	0.145526	0.00787862	0.0161027
Q9UPW5	Cytosolic carboxypeptidase 1 OS=Homo sapiens GN=AGTPBP1 PE=1 SV=3	0.976	-0.0350469	-0.129769	1.005	0.0071955	0.145526	0.00787862	0.0161027
Q96FQ6	Protein S100-A16 OS=Homo sapiens GN=S100A16 PE=1 SV=1	0.969	-0.0454314	-0.200362	1.005	0.0071955	0.145526	-0.0274182	0.0458034
P11021	78 kDa glucose-regulated protein OS=Homo sapiens GN=HSPA5 PE=1 SV=2	0.969	-0.0454314	-0.200362	1.005	0.0071955	0.145526	-0.0274182	0.0458034
P61086	Ubiquitin-conjugating enzyme E2 K OS=Homo sapiens GN=UBE2K PE=1 SV=3	0.967	-0.0484122	-0.220625	1.005	0.0071955	0.145526	-0.0375496	0.0598758
Q99700	Ataxin-2 OS=Homo sapiens GN=ATXN2 PE=1 SV=2	0.967	-0.0484122	-0.220625	1.005	0.0071955	0.145526	-0.0375496	0.0598758
P46736	Lys-63-specific deubiquitinase BRCC36 OS=Homo sapiens GN=BRCC3 PE=1 SV=2	0.963	-0.0543923	-0.261278	1.005	0.0071955	0.145526	-0.0578758	0.0843255
Q9H910	Hematological and neurological expressed 1-like protein OS=Homo sapiens GN=HN1L PE=1 SV=1	0.962	-0.0558912	-0.271467	1.005	0.0071955	0.145526	-0.0629705	0.0897639
Q9Y4W6	AFG3-like protein 2 OS=Homo sapiens GN=AFG3L2 PE=1 SV=2	0.959	-0.0603973	-0.302099	1.005	0.0071955	0.145526	-0.0782867	0.104695
O75494	Serine/arginine-rich splicing factor 10 OS=Homo sapiens GN=SRSF10 PE=1 SV=1	0.942	-0.086201	-0.477512	1.005	0.0071955	0.145526	-0.165993	0.162208
P85037	Forkhead box protein K1 OS=Homo sapiens GN=FOXK1 PE=1 SV=1	1.139	0.187768	1.38492	1.004	0.00575927	0.135892	0.760404	0.358791
Q7Z6E9	E3 ubiquitin-protein ligase RBBP6 OS=Homo sapiens GN=RBBP6 PE=1 SV=1	1.085	0.117695	0.908564	1.004	0.00575927	0.135892	0.522228	0.392027
Q6ZNB6	NF-X1-type zinc finger protein NFXL1 OS=Homo sapiens GN=NFXL1 PE=1 SV=2	1.064	0.0894982	0.716883	1.004	0.00575927	0.135892	0.426387	0.419374
O60784	Target of Myb protein 1 OS=Homo sapiens GN=TOM1 PE=1 SV=2	1.055	0.077243	0.633572	1.004	0.00575927	0.135892	0.384732	0.437121
O15479	Melanoma-associated antigen B2 OS=Homo sapiens GN=MAGEB2 PE=1 SV=3	1.05	0.0703893	0.586982	1.004	0.00575927	0.135892	0.361437	0.449566
O00400	Acetyl-coenzyme A transporter 1 OS=Homo sapiens GN=SLC33A1 PE=1 SV=1	1.05	0.0703893	0.586982	1.004	0.00575927	0.135892	0.361437	0.449566
Q12888	Tumor suppressor p53-binding protein 1 OS=Homo sapiens GN=TP53BP1 PE=1 SV=2	1.042	0.0593553	0.511974	1.004	0.00575927	0.135892	0.323933	0.475173
Q5T6V5	UPF0553 protein C9orf64 OS=Homo sapiens GN=C9orf64 PE=1 SV=1	1.041	0.0579701	0.502557	1.004	0.00575927	0.135892	0.319224	0.479021
O75165	DnaJ homolog subfamily C member 13 OS=Homo sapiens GN=DNAJC13 PE=1 SV=5	1.04	0.0565835	0.493131	1.004	0.00575927	0.135892	0.314511	0.483047
P07237	Protein disulfide-isomerase OS=Homo sapiens GN=P4HB PE=1 SV=3	1.034	0.0482362	0.436386	1.004	0.00575927	0.135892	0.286139	0.511711
Q9NQT5	Exosome complex component RRP40 OS=Homo sapiens GN=EXOSC3 PE=1 SV=3	1.029	0.041243	0.388847	1.004	0.00575927	0.135892	0.262369	0.543687
P13984	General transcription factor IIF subunit 2 OS=Homo sapiens GN=GTF2F2 PE=1 SV=2	1.018	0.0257376	0.283441	1.004	0.00575927	0.135892	0.209667	0.666769
O94888	UBX domain-containing protein 7 OS=Homo sapiens GN=UBXN7 PE=1 SV=2	1.011	0.015783	0.215771	1.004	0.00575927	0.135892	0.175831	0.847118
P40763	Signal transducer and activator of transcription 3 OS=Homo sapiens GN=STAT3 PE=1 SV=2	0.994	-0.00868224	0.0494573	1.004	0.00575927	0.135892	0.0926745	0.556282
P62993	Growth factor receptor-bound protein 2 OS=Homo sapiens GN=GRB2 PE=1 SV=1	0.993	-0.0101344	0.0395853	1.004	0.00575927	0.135892	0.0877385	0.495467
Q96P70	Importin-9 OS=Homo sapiens GN=IPO9 PE=1 SV=3	0.989	-0.0159576	0	1.004	0.00575927	0.135892	0.0679458	0.30103
P46926	Glucosamine-6-phosphate isomerase 1 OS=Homo sapiens GN=GNPDA1 PE=1 SV=1	0.985	-0.0218044	-0.0397463	1.004	0.00575927	0.135892	0.0480726	0.166758
P40227	T-complex protein 1 subunit zeta OS=Homo sapiens GN=CCT6A PE=1 SV=3	0.984	-0.0232698	-0.049708	1.004	0.00575927	0.135892	0.0430918	0.140714
P46977	Dolichyl-diphosphooligosaccharide--protein glycosyltransferase subunit STT3A OS=Homo sapiens GN=STT3A PE=1 SV=2	0.979	-0.0306192	-0.0996698	1.004	0.00575927	0.135892	0.0181109	0.0443753
Q99543	DnaJ homolog subfamily C member 2 OS=Homo sapiens GN=DNAJC2 PE=1 SV=4	0.951	-0.0724828	-0.384256	1.004	0.00575927	0.135892	-0.124182	0.144844
Q9P2I0	Cleavage and polyadenylation specificity factor subunit 2 OS=Homo sapiens GN=CPSF2 PE=1 SV=2	0.947	-0.0785637	-0.425593	1.004	0.00575927	0.135892	-0.144851	0.156918
Q5SY16	Polynucleotide 5'-hydroxyl-kinase NOL9 OS=Homo sapiens GN=NOL9 PE=1 SV=1	0.941	-0.0877334	-0.487929	1.004	0.00575927	0.135892	-0.176019	0.172036
P42766	60S ribosomal protein L35 OS=Homo sapiens GN=RPL35 PE=1 SV=2	0.893	-0.163268	-1.00141	1.004	0.00575927	0.135892	-0.432759	0.232202
P51452	Dual specificity protein phosphatase 3 OS=Homo sapiens GN=DUSP3 PE=1 SV=1	1.191	0.252173	1.82274	1.003	0.00432161	0.126249	0.974495	0.341058
Q6SJ96	TATA box-binding protein-like protein 2 OS=Homo sapiens GN=TBPL2 PE=2 SV=1	1.034	0.0482362	0.436386	1.003	0.00432161	0.126249	0.281318	0.493877
A0MZ66	Shootin-1 OS=Homo sapiens GN=SHTN1 PE=1 SV=4	1.033	0.0468403	0.426896	1.003	0.00432161	0.126249	0.276573	0.499015
P08648	Integrin alpha-5 OS=Homo sapiens GN=ITGA5 PE=1 SV=2	1.029	0.041243	0.388847	1.003	0.00432161	0.126249	0.257548	0.522675
Q9BQ52	Zinc phosphodiesterase ELAC protein 2 OS=Homo sapiens GN=ELAC2 PE=1 SV=2	1.026	0.0370307	0.360212	1.003	0.00432161	0.126249	0.24323	0.544559
Q9UBE0	SUMO-activating enzyme subunit 1 OS=Homo sapiens GN=SAE1 PE=1 SV=1	1.012	0.0172093	0.225466	1.003	0.00432161	0.126249	0.175858	0.756864
Q9Y383	Putative RNA-binding protein Luc7-like 2 OS=Homo sapiens GN=LUC7L2 PE=1 SV=2	0.997	-0.00433459	0.0790121	1.003	0.00432161	0.126249	0.10263	0.841643
Q9UQE7	Structural maintenance of chromosomes protein 3 OS=Homo sapiens GN=SMC3 PE=1 SV=2	0.996	-0.00578235	0.0691704	1.003	0.00432161	0.126249	0.0977096	0.742531
P48444	Coatomer subunit delta OS=Homo sapiens GN=ARCN1 PE=1 SV=1	0.992	-0.011588	0.029704	1.003	0.00432161	0.126249	0.0779764	0.45236
Q96GQ7	Probable ATP-dependent RNA helicase DDX27 OS=Homo sapiens GN=DDX27 PE=1 SV=2	0.99	-0.0144996	0.00991132	1.003	0.00432161	0.126249	0.06808	0.346668
P42574	Caspase-3 OS=Homo sapiens GN=CASP3 PE=1 SV=2	0.988	-0.0174171	-0.00992193	1.003	0.00432161	0.126249	0.0581634	0.259693
P19387	DNA-directed RNA polymerase II subunit RPB3 OS=Homo sapiens GN=POLR2C PE=1 SV=2	0.981	-0.027675	-0.0796544	1.003	0.00432161	0.126249	0.0232972	0.0663488
Q9Y6M1	Insulin-like growth factor 2 mRNA-binding protein 2 OS=Homo sapiens GN=IGF2BP2 PE=1 SV=2	0.923	-0.115597	-0.677348	1.003	0.00432161	0.126249	-0.275549	0.209496
O75592	E3 ubiquitin-protein ligase MYCBP2 OS=Homo sapiens GN=MYCBP2 PE=1 SV=3	0.913	-0.131313	-0.784183	1.003	0.00432161	0.126249	-0.328967	0.220678
P02792	Ferritin light chain OS=Homo sapiens GN=FTL PE=1 SV=2	1.177	0.235114	1.70678	1.002	0.00288251	0.116595	0.911685	0.340485
P09496	Clathrin light chain A OS=Homo sapiens GN=CLTA PE=1 SV=1	1.096	0.132248	1.00749	1.002	0.00288251	0.116595	0.562044	0.369927
Q9Y697	Cysteine desulfurase, mitochondrial OS=Homo sapiens GN=NFS1 PE=1 SV=3	1.047	0.0662614	0.558921	1.002	0.00288251	0.116595	0.337758	0.432887
Q99627	COP9 signalosome complex subunit 8 OS=Homo sapiens GN=COPS8 PE=1 SV=1	1.046	0.0648829	0.549549	1.002	0.00288251	0.116595	0.333072	0.435446
Q9Y512	Sorting and assembly machinery component 50 homolog OS=Homo sapiens GN=SAMM50 PE=1 SV=3	1.045	0.0635029	0.540168	1.002	0.00288251	0.116595	0.328382	0.438109
Q9NZN8	CCR4-NOT transcription complex subunit 2 OS=Homo sapiens GN=CNOT2 PE=1 SV=1	1.037	0.0524159	0.464799	1.002	0.00288251	0.116595	0.290697	0.464033
Q9NVM9	Protein asunder homolog OS=Homo sapiens GN=ASUN PE=1 SV=2	1.028	0.0398403	0.379311	1.002	0.00288251	0.116595	0.247953	0.508432
Q9H223	EH domain-containing protein 4 OS=Homo sapiens GN=EHD4 PE=1 SV=1	1.028	0.0398403	0.379311	1.002	0.00288251	0.116595	0.247953	0.508432
Q15020	Squamous cell carcinoma antigen recognized by T-cells 3 OS=Homo sapiens GN=SART3 PE=1 SV=1	1.019	0.0271541	0.293071	1.002	0.00288251	0.116595	0.204833	0.586786
Q9BWM7	Sideroflexin-3 OS=Homo sapiens GN=SFXN3 PE=1 SV=2	1.01	0.0143553	0.206065	1.002	0.00288251	0.116595	0.16133	0.763964
Q9H7N4	Splicing factor, arginine/serine-rich 19 OS=Homo sapiens GN=SCAF1 PE=1 SV=3	1.005	0.0071955	0.157393	1.002	0.00288251	0.116595	0.136994	1.02639
P18085	ADP-ribosylation factor 4 OS=Homo sapiens GN=ARF4 PE=1 SV=3	0.998	-0.00288828	0.0888445	1.002	0.00288251	0.116595	0.10272	1.06815
O95816	BAG family molecular chaperone regulator 2 OS=Homo sapiens GN=BAG2 PE=1 SV=1	0.988	-0.0174171	-0.00992193	1.002	0.00288251	0.116595	0.0533366	0.256455
P32322	Pyrroline-5-carboxylate reductase 1, mitochondrial OS=Homo sapiens GN=PYCR1 PE=1 SV=2	0.985	-0.0218044	-0.0397463	1.002	0.00288251	0.116595	0.0384244	0.14926
Q13523	Serine/threonine-protein kinase PRP4 homolog OS=Homo sapiens GN=PRPF4B PE=1 SV=3	0.977	-0.0335695	-0.119726	1.002	0.00288251	0.116595	-0.0015652	0.00367769
P14314	Glucosidase 2 subunit beta OS=Homo sapiens GN=PRKCSH PE=1 SV=2	0.972	-0.0409718	-0.170046	1.002	0.00288251	0.116595	-0.0267252	0.0542183
Q86Y56	Dynein assembly factor 5, axonemal OS=Homo sapiens GN=DNAAF5 PE=1 SV=4	0.969	-0.0454314	-0.200362	1.002	0.00288251	0.116595	-0.0418836	0.0780475
O95292	Vesicle-associated membrane protein-associated protein B/C OS=Homo sapiens GN=VAPB PE=1 SV=3	0.967	-0.0484122	-0.220625	1.002	0.00288251	0.116595	-0.052015	0.0917809
P25789	Proteasome subunit alpha type-4 OS=Homo sapiens GN=PSMA4 PE=1 SV=1	0.962	-0.0558912	-0.271467	1.002	0.00288251	0.116595	-0.077436	0.120181
P30041	Peroxiredoxin-6 OS=Homo sapiens GN=PRDX6 PE=1 SV=3	0.956	-0.0649175	-0.332828	1.002	0.00288251	0.116595	-0.108116	0.14599
Q8IWE2	Protein NOXP20 OS=Homo sapiens GN=FAM114A1 PE=1 SV=2	0.955	-0.0664274	-0.343092	1.002	0.00288251	0.116595	-0.113248	0.149629
P51398	28S ribosomal protein S29, mitochondrial OS=Homo sapiens GN=DAP3 PE=1 SV=1	0.955	-0.0664274	-0.343092	1.002	0.00288251	0.116595	-0.113248	0.149629
Q14684	Ribosomal RNA processing protein 1 homolog B OS=Homo sapiens GN=RRP1B PE=1 SV=3	0.953	-0.0694519	-0.363652	1.002	0.00288251	0.116595	-0.123528	0.156442
P07602	Prosaposin OS=Homo sapiens GN=PSAP PE=1 SV=2	0.947	-0.0785637	-0.425593	1.002	0.00288251	0.116595	-0.154499	0.173776
O15514	DNA-directed RNA polymerase II subunit RPB4 OS=Homo sapiens GN=POLR2D PE=1 SV=1	1.191	0.252173	1.82274	1.001	0.00144197	0.106933	0.964837	0.334705
Q14966	Zinc finger protein 638 OS=Homo sapiens GN=ZNF638 PE=1 SV=2	1.045	0.0635029	0.540168	1.001	0.00144197	0.106933	0.323551	0.425295
Q9NR33	DNA polymerase epsilon subunit 4 OS=Homo sapiens GN=POLE4 PE=1 SV=2	1.036	0.051024	0.455338	1.001	0.00144197	0.106933	0.281135	0.452035
Q9BXS5	AP-1 complex subunit mu-1 OS=Homo sapiens GN=AP1M1 PE=1 SV=3	1.031	0.0440443	0.40789	1.001	0.00144197	0.106933	0.257412	0.472659
Q9Y618	Nuclear receptor corepressor 2 OS=Homo sapiens GN=NCOR2 PE=1 SV=2	1.009	0.0129262	0.19635	1.001	0.00144197	0.106933	0.151641	0.738683
P02545	Prelamin-A/C OS=Homo sapiens GN=LMNA PE=1 SV=1	1.005	0.0071955	0.157393	1.001	0.00144197	0.106933	0.132163	0.920505
Q8IY81	pre-rRNA processing protein FTSJ3 OS=Homo sapiens GN=FTSJ3 PE=1 SV=2	0.967	-0.0484122	-0.220625	1.001	0.00144197	0.106933	-0.0568461	0.10385
Q05048	Cleavage stimulation factor subunit 1 OS=Homo sapiens GN=CSTF1 PE=1 SV=1	0.963	-0.0543923	-0.261278	1.001	0.00144197	0.106933	-0.0771723	0.1265
P60903	Protein S100-A10 OS=Homo sapiens GN=S100A10 PE=1 SV=2	0.958	-0.0619024	-0.312331	1.001	0.00144197	0.106933	-0.102699	0.148744
Q96SB3	Neurabin-2 OS=Homo sapiens GN=PPP1R9B PE=1 SV=2	0.958	-0.0619024	-0.312331	1.001	0.00144197	0.106933	-0.102699	0.148744
Q9BV38	WD repeat-containing protein 18 OS=Homo sapiens GN=WDR18 PE=1 SV=2	1.286	0.362891	2.57539	1	0	0.0972601	1.33633	0.322421
P49674	Casein kinase I isoform epsilon OS=Homo sapiens GN=CSNK1E PE=1 SV=1	1.085	0.117695	0.908564	1	0	0.0972601	0.502912	0.364406
P11908	Ribose-phosphate pyrophosphokinase 2 OS=Homo sapiens GN=PRPS2 PE=1 SV=2	1.069	0.0962619	0.762862	1	0	0.0972601	0.430061	0.377506
O43818	U3 small nucleolar RNA-interacting protein 2 OS=Homo sapiens GN=RRP9 PE=1 SV=1	1.066	0.0922074	0.7353	1	0	0.0972601	0.41628	0.380616
Q8NCN5	Pyruvate dehydrogenase phosphatase regulatory subunit, mitochondrial OS=Homo sapiens GN=PDPR PE=1 SV=2	1.055	0.077243	0.633572	1	0	0.0972601	0.365416	0.394664
P78332	RNA-binding protein 6 OS=Homo sapiens GN=RBM6 PE=1 SV=5	1.035	0.0496308	0.445866	1	0	0.0972601	0.271563	0.439769
Q9NRV9	Heme-binding protein 1 OS=Homo sapiens GN=HEBP1 PE=1 SV=1	1.035	0.0496308	0.445866	1	0	0.0972601	0.271563	0.439769
Q99848	Probable rRNA-processing protein EBP2 OS=Homo sapiens GN=EBNA1BP2 PE=1 SV=2	1.023	0.0328061	0.331493	1	0	0.0972601	0.214377	0.497143
Q96B26	Exosome complex component RRP43 OS=Homo sapiens GN=EXOSC8 PE=1 SV=1	1.021	0.0299829	0.312301	1	0	0.0972601	0.204781	0.511734
P40429	60S ribosomal protein L13a OS=Homo sapiens GN=RPL13A PE=1 SV=2	1.018	0.0257376	0.283441	1	0	0.0972601	0.190351	0.538254
P46940	Ras GTPase-activating-like protein IQGAP1 OS=Homo sapiens GN=IQGAP1 PE=1 SV=1	1.002	0.00288251	0.128074	1	0	0.0972601	0.112667	1.06289
P35232	Prohibitin OS=Homo sapiens GN=PHB PE=1 SV=1	0.997	-0.00433459	0.0790121	1	0	0.0972601	0.0881361	1.18263
P48739	Phosphatidylinositol transfer protein beta isoform OS=Homo sapiens GN=PITPNB PE=1 SV=2	0.995	-0.00723157	0.0593188	1	0	0.0972601	0.0782895	0.820032
P12955	Xaa-Pro dipeptidase OS=Homo sapiens GN=PEPD PE=1 SV=3	0.994	-0.00868224	0.0494573	1	0	0.0972601	0.0733587	0.697852
P57740	Nuclear pore complex protein Nup107 OS=Homo sapiens GN=NUP107 PE=1 SV=1	0.988	-0.0174171	-0.00992193	1	0	0.0972601	0.0436691	0.248166
O96011	Peroxisomal membrane protein 11B OS=Homo sapiens GN=PEX11B PE=1 SV=1	0.975	-0.0365259	-0.139822	1	0	0.0972601	-0.0212811	0.0521178
P18859	ATP synthase-coupling factor 6, mitochondrial OS=Homo sapiens GN=ATP5J PE=1 SV=1	0.974	-0.0380063	-0.149887	1	0	0.0972601	-0.0263134	0.062264
Q99590	Protein SCAF11 OS=Homo sapiens GN=SCAF11 PE=1 SV=2	0.973	-0.0394883	-0.159961	1	0	0.0972601	-0.0313505	0.0717146
Q96IJ6	Mannose-1-phosphate guanyltransferase alpha OS=Homo sapiens GN=GMPPA PE=1 SV=1	0.96	-0.0588937	-0.291878	1	0	0.0972601	-0.097309	0.151953
Q13085	Acetyl-CoA carboxylase 1 OS=Homo sapiens GN=ACACA PE=1 SV=2	0.926	-0.110916	-0.645523	1	0	0.0972601	-0.274131	0.225335
Q96T51	RUN and FYVE domain-containing protein 1 OS=Homo sapiens GN=RUFY1 PE=1 SV=2	0.918	-0.123434	-0.73062	1	0	0.0972601	-0.31668	0.2334
Q12894	Interferon-related developmental regulator 2 OS=Homo sapiens GN=IFRD2 PE=1 SV=3	0.91	-0.136062	-0.816461	1	0	0.0972601	-0.359601	0.239969
Q14103	Heterogeneous nuclear ribonucleoprotein D0 OS=Homo sapiens GN=HNRNPD PE=1 SV=1	0.896	-0.158429	-0.968517	1	0	0.0972601	-0.435628	0.248939
Q15554	Telomeric repeat-binding factor 2 OS=Homo sapiens GN=TERF2 PE=1 SV=3	0.886	-0.174621	-1.07859	1	0	0.0972601	-0.490665	0.253949
P61619	Protein transport protein Sec61 subunit alpha isoform 1 OS=Homo sapiens GN=SEC61A1 PE=1 SV=2	1.045	0.0635029	0.540168	0.999	-0.00144342	0.0875781	0.313873	0.400472
Q14696	LDLR chaperone MESD OS=Homo sapiens GN=MESDC2 PE=1 SV=2	1.043	0.0607392	0.52138	0.999	-0.00144342	0.0875781	0.304479	0.404444
P46060	Ran GTPase-activating protein 1 OS=Homo sapiens GN=RANGAP1 PE=1 SV=1	1.026	0.0370307	0.360212	0.999	-0.00144342	0.0875781	0.223895	0.458215
Q09161	Nuclear cap-binding protein subunit 1 OS=Homo sapiens GN=NCBP1 PE=1 SV=1	1.021	0.0299829	0.312301	0.999	-0.00144342	0.0875781	0.19994	0.486856
Q5JSH3	WD repeat-containing protein 44 OS=Homo sapiens GN=WDR44 PE=1 SV=1	1.005	0.0071955	0.157393	0.999	-0.00144342	0.0875781	0.122486	0.752649
Q15149	Plectin OS=Homo sapiens GN=PLEC PE=1 SV=3	1	0	0.108479	0.999	-0.00144342	0.0875781	0.0980284	1.16998
P53999	Activated RNA polymerase II transcriptional coactivator p15 OS=Homo sapiens GN=SUB1 PE=1 SV=3	0.996	-0.00578235	0.0691704	0.999	-0.00144342	0.0875781	0.0783742	1.12831
P05026	Sodium/potassium-transporting ATPase subunit beta-1 OS=Homo sapiens GN=ATP1B1 PE=1 SV=1	0.968	-0.046921	-0.210489	0.999	-0.00144342	0.0875781	-0.0614552	0.124355
O43290	U4/U6.U5 tri-snRNP-associated protein 1 OS=Homo sapiens GN=SART1 PE=1 SV=1	0.962	-0.0558912	-0.271467	0.999	-0.00144342	0.0875781	-0.0919445	0.155728
P50502	Hsc70-interacting protein OS=Homo sapiens GN=ST13 PE=1 SV=2	0.918	-0.123434	-0.73062	0.999	-0.00144342	0.0875781	-0.321521	0.239617
Q6YHK3	CD109 antigen OS=Homo sapiens GN=CD109 PE=1 SV=2	0.857	-0.222633	-1.40497	0.999	-0.00144342	0.0875781	-0.658696	0.267902
Q9NYK5	39S ribosomal protein L39, mitochondrial OS=Homo sapiens GN=MRPL39 PE=1 SV=3	1.128	0.173767	1.28974	0.998	-0.00288828	0.0778864	0.683813	0.335733
Q92804	TATA-binding protein-associated factor 2N OS=Homo sapiens GN=TAF15 PE=1 SV=1	1.118	0.16092	1.20241	0.998	-0.00288828	0.0778864	0.640147	0.338357
Q00535	Cyclin-dependent-like kinase 5 OS=Homo sapiens GN=CDK5 PE=1 SV=3	1.077	0.107018	0.835984	0.998	-0.00288828	0.0778864	0.456935	0.355701
Q96GM8	Target of EGR1 protein 1 OS=Homo sapiens GN=TOE1 PE=1 SV=1	1.037	0.0524159	0.464799	0.998	-0.00288828	0.0778864	0.271343	0.404169
Q8NBF2	NHL repeat-containing protein 2 OS=Homo sapiens GN=NHLRC2 PE=1 SV=1	1.033	0.0468403	0.426896	0.998	-0.00288828	0.0778864	0.252391	0.414411
O94905	Erlin-2 OS=Homo sapiens GN=ERLIN2 PE=1 SV=1	1.022	0.0313952	0.321901	0.998	-0.00288828	0.0778864	0.199894	0.457337
Q14BN4	Sarcolemmal membrane-associated protein OS=Homo sapiens GN=SLMAP PE=1 SV=1	1.019	0.0271541	0.293071	0.998	-0.00288828	0.0778864	0.185479	0.475429
Q86XL3	Ankyrin repeat and LEM domain-containing protein 2 OS=Homo sapiens GN=ANKLE2 PE=1 SV=4	1.018	0.0257376	0.283441	0.998	-0.00288828	0.0778864	0.180664	0.482437
Q93050	V-type proton ATPase 116 kDa subunit a isoform 1 OS=Homo sapiens GN=ATP6V0A1 PE=1 SV=3	1.012	0.0172093	0.225466	0.998	-0.00288828	0.0778864	0.151676	0.540227
O95999	B-cell lymphoma/leukemia 10 OS=Homo sapiens GN=BCL10 PE=1 SV=1	1.002	0.00288251	0.128074	0.998	-0.00288828	0.0778864	0.10298	0.817692
Q9Y2W2	WW domain-binding protein 11 OS=Homo sapiens GN=WBP11 PE=1 SV=1	0.992	-0.011588	0.029704	0.998	-0.00288828	0.0778864	0.0537952	0.571787
Q9BUH6	Protein PAXX OS=Homo sapiens GN=C9orf142 PE=1 SV=2	0.978	-0.0320936	-0.109693	0.998	-0.00288828	0.0778864	-0.0159031	0.0491141
Q9Y266	Nuclear migration protein nudC OS=Homo sapiens GN=NUDC PE=1 SV=1	0.974	-0.0380063	-0.149887	0.998	-0.00288828	0.0778864	-0.0360002	0.0941565
P53004	Biliverdin reductase A OS=Homo sapiens GN=BLVRA PE=1 SV=2	0.974	-0.0380063	-0.149887	0.998	-0.00288828	0.0778864	-0.0360002	0.0941565
Q9H2P9	Diphthine methyl ester synthase OS=Homo sapiens GN=DPH5 PE=1 SV=2	0.972	-0.0409718	-0.170046	0.998	-0.00288828	0.0778864	-0.0460796	0.111575
Q8N8U2	Chromodomain Y-like protein 2 OS=Homo sapiens GN=CDYL2 PE=1 SV=2	0.925	-0.112475	-0.656119	0.998	-0.00288828	0.0778864	-0.289116	0.240166
Q92766	Ras-responsive element-binding protein 1 OS=Homo sapiens GN=RREB1 PE=1 SV=3	0.819	-0.288065	-1.84977	0.998	-0.00288828	0.0778864	-0.885943	0.278363
Q6IN85	Serine/threonine-protein phosphatase 4 regulatory subunit 3A OS=Homo sapiens GN=PPP4R3A PE=1 SV=1	1.187	0.24732	1.78975	0.997	-0.00433459	0.0681843	0.928966	0.322614
P16401	Histone H1.5 OS=Homo sapiens GN=HIST1H1B PE=1 SV=3	1.072	0.100305	0.790347	0.997	-0.00433459	0.0681843	0.429266	0.351432
Q8IVF2	Protein AHNAK2 OS=Homo sapiens GN=AHNAK2 PE=1 SV=2	1.047	0.0662614	0.558921	0.997	-0.00433459	0.0681843	0.313553	0.373948
O00425	Insulin-like growth factor 2 mRNA-binding protein 3 OS=Homo sapiens GN=IGF2BP3 PE=1 SV=2	1.018	0.0257376	0.283441	0.997	-0.00433459	0.0681843	0.175813	0.456291
Q92922	SWI/SNF complex subunit SMARCC1 OS=Homo sapiens GN=SMARCC1 PE=1 SV=3	1.014	0.0200577	0.24483	0.997	-0.00433459	0.0681843	0.156507	0.485339
Q14203	Dynactin subunit 1 OS=Homo sapiens GN=DCTN1 PE=1 SV=3	1.014	0.0200577	0.24483	0.997	-0.00433459	0.0681843	0.156507	0.485339
P62333	26S protease regulatory subunit 10B OS=Homo sapiens GN=PSMC6 PE=1 SV=1	1.01	0.0143553	0.206065	0.997	-0.00433459	0.0681843	0.137125	0.527873
Q9HC38	Glyoxalase domain-containing protein 4 OS=Homo sapiens GN=GLOD4 PE=1 SV=1	0.986	-0.0203404	-0.0297948	0.997	-0.00433459	0.0681843	0.0191948	0.117893
Q7L273	BTB/POZ domain-containing protein KCTD9 OS=Homo sapiens GN=KCTD9 PE=1 SV=1	0.976	-0.0350469	-0.129769	0.997	-0.00433459	0.0681843	-0.0307922	0.0925961
Q8IVD9	NudC domain-containing protein 3 OS=Homo sapiens GN=NUDCD3 PE=1 SV=3	0.969	-0.0454314	-0.200362	0.997	-0.00433459	0.0681843	-0.066089	0.149465
Q8NBU5	ATPase family AAA domain-containing protein 1 OS=Homo sapiens GN=ATAD1 PE=1 SV=1	0.963	-0.0543923	-0.261278	0.997	-0.00433459	0.0681843	-0.0965467	0.178807
Q9Y2U5	Mitogen-activated protein kinase kinase kinase 2 OS=Homo sapiens GN=MAP3K2 PE=1 SV=2	0.96	-0.0588937	-0.291878	0.997	-0.00433459	0.0681843	-0.111847	0.189702
Q9H3P7	Golgi resident protein GCP60 OS=Homo sapiens GN=ACBD3 PE=1 SV=4	0.954	-0.0679388	-0.353366	0.997	-0.00433459	0.0681843	-0.142591	0.206665
Q53F19	Nuclear cap-binding protein subunit 3 OS=Homo sapiens GN=NCBP3 PE=1 SV=2	0.935	-0.0969617	-0.550663	0.997	-0.00433459	0.0681843	-0.241239	0.23775
Q04206	Transcription factor p65 OS=Homo sapiens GN=RELA PE=1 SV=2	0.93	-0.104697	-0.603249	0.997	-0.00433459	0.0681843	-0.267532	0.242868
Q96KR1	Zinc finger RNA-binding protein OS=Homo sapiens GN=ZFR PE=1 SV=2	0.924	-0.114035	-0.666727	0.997	-0.00433459	0.0681843	-0.299272	0.248044
Q86WA8	Lon protease homolog 2, peroxisomal OS=Homo sapiens GN=LONP2 PE=1 SV=1	0.92	-0.120294	-0.709276	0.997	-0.00433459	0.0681843	-0.320546	0.251028
P62487	DNA-directed RNA polymerase II subunit RPB7 OS=Homo sapiens GN=POLR2G PE=1 SV=1	0.919	-0.121863	-0.719942	0.997	-0.00433459	0.0681843	-0.325879	0.251724
Q96RP9	Elongation factor G, mitochondrial OS=Homo sapiens GN=GFM1 PE=1 SV=2	1.225	0.292782	2.0988	0.996	-0.00578235	0.0584732	1.07863	0.316711
O14787	Transportin-2 OS=Homo sapiens GN=TNPO2 PE=1 SV=3	1.166	0.221568	1.61469	0.996	-0.00578235	0.0584732	0.83658	0.321522
P49407	Beta-arrestin-1 OS=Homo sapiens GN=ARRB1 PE=1 SV=2	1.122	0.166073	1.23743	0.996	-0.00578235	0.0584732	0.647953	0.327958
Q9H2U2	Inorganic pyrophosphatase 2, mitochondrial OS=Homo sapiens GN=PPA2 PE=1 SV=2	1.094	0.129613	0.98958	0.996	-0.00578235	0.0584732	0.524027	0.334957
O95613	Pericentrin OS=Homo sapiens GN=PCNT PE=1 SV=4	1.065	0.0908534	0.726097	0.996	-0.00578235	0.0584732	0.392285	0.347906
Q53H96	Pyrroline-5-carboxylate reductase 3 OS=Homo sapiens GN=PYCRL PE=1 SV=3	1.037	0.0524159	0.464799	0.996	-0.00578235	0.0584732	0.261636	0.37641
Q99959	Plakophilin-2 OS=Homo sapiens GN=PKP2 PE=1 SV=2	1.031	0.0440443	0.40789	0.996	-0.00578235	0.0584732	0.233182	0.3879
Q9NSK0	Kinesin light chain 4 OS=Homo sapiens GN=KLC4 PE=1 SV=3	1.022	0.0313952	0.321901	0.996	-0.00578235	0.0584732	0.190187	0.413856
P54136	Arginine--tRNA ligase, cytoplasmic OS=Homo sapiens GN=RARS PE=1 SV=2	1.018	0.0257376	0.283441	0.996	-0.00578235	0.0584732	0.170957	0.43123
Q5UIP0	Telomere-associated protein RIF1 OS=Homo sapiens GN=RIF1 PE=1 SV=2	1.017	0.0243197	0.273802	0.996	-0.00578235	0.0584732	0.166138	0.436453
P26038	Moesin OS=Homo sapiens GN=MSN PE=1 SV=3	1.005	0.0071955	0.157393	0.996	-0.00578235	0.0584732	0.107933	0.562964
P14324	Farnesyl pyrophosphate synthase OS=Homo sapiens GN=FDPS PE=1 SV=4	0.997	-0.00433459	0.0790121	0.996	-0.00578235	0.0584732	0.0687426	1.025
Q9H078	Caseinolytic peptidase B protein homolog OS=Homo sapiens GN=CLPB PE=1 SV=1	0.994	-0.00868224	0.0494573	0.996	-0.00578235	0.0584732	0.0539652	1.27526
Q8NDH3	Probable aminopeptidase NPEPL1 OS=Homo sapiens GN=NPEPL1 PE=1 SV=3	0.991	-0.013043	0.0198126	0.996	-0.00578235	0.0584732	0.0391429	0.534585
P51812	Ribosomal protein S6 kinase alpha-3 OS=Homo sapiens GN=RPS6KA3 PE=1 SV=1	0.982	-0.0262051	-0.0696623	0.996	-0.00578235	0.0584732	-0.00559456	0.0247754
Q9H8Y5	Ankyrin repeat and zinc finger domain-containing protein 1 OS=Homo sapiens GN=ANKZF1 PE=1 SV=1	0.981	-0.027675	-0.0796544	0.996	-0.00578235	0.0584732	-0.0105906	0.0442489
Q8IWT6	Volume-regulated anion channel subunit LRRC8A OS=Homo sapiens GN=LRRC8A PE=1 SV=1	0.979	-0.0306192	-0.0996698	0.996	-0.00578235	0.0584732	-0.0205983	0.076878
O43252	Bifunctional 3'-phosphoadenosine 5'-phosphosulfate synthase 1 OS=Homo sapiens GN=PAPSS1 PE=1 SV=2	0.953	-0.0694519	-0.363652	0.996	-0.00578235	0.0584732	-0.152589	0.220767
Q9Y3D0	Mitotic spindle-associated MMXD complex subunit MIP18 OS=Homo sapiens GN=FAM96B PE=1 SV=1	0.915	-0.128156	-0.762722	0.996	-0.00578235	0.0584732	-0.352124	0.260657
Q6KC79	Nipped-B-like protein OS=Homo sapiens GN=NIPBL PE=1 SV=2	0.912	-0.132894	-0.79493	0.996	-0.00578235	0.0584732	-0.368229	0.262216
Q9Y6W5	Wiskott-Aldrich syndrome protein family member 2 OS=Homo sapiens GN=WASF2 PE=1 SV=3	0.897	-0.15682	-0.957577	0.996	-0.00578235	0.0584732	-0.449552	0.268551
Q9NYB0	Telomeric repeat-binding factor 2-interacting protein 1 OS=Homo sapiens GN=TERF2IP PE=1 SV=1	1.12	0.163499	1.21994	0.995	-0.00723157	0.0487522	0.634344	0.323698
Q96I99	Succinyl-CoA ligase [GDP-forming] subunit beta, mitochondrial OS=Homo sapiens GN=SUCLG2 PE=1 SV=2	1.07	0.0976108	0.772033	0.995	-0.00723157	0.0487522	0.410393	0.337382
P48735	Isocitrate dehydrogenase [NADP], mitochondrial OS=Homo sapiens GN=IDH2 PE=1 SV=2	1.069	0.0962619	0.762862	0.995	-0.00723157	0.0487522	0.405807	0.337837
Q92734	Protein TFG OS=Homo sapiens GN=TFG PE=1 SV=2	1.066	0.0922074	0.7353	0.995	-0.00723157	0.0487522	0.392026	0.339275
O43395	U4/U6 small nuclear ribonucleoprotein Prp3 OS=Homo sapiens GN=PRPF3 PE=1 SV=2	1.039	0.0551957	0.483696	0.995	-0.00723157	0.0487522	0.266224	0.360463
Q7Z417	Nuclear fragile X mental retardation-interacting protein 2 OS=Homo sapiens GN=NUFIP2 PE=1 SV=1	1.013	0.0186342	0.235153	0.995	-0.00723157	0.0487522	0.141953	0.431964
Q15393	Splicing factor 3B subunit 3 OS=Homo sapiens GN=SF3B3 PE=1 SV=4	1.01	0.0143553	0.206065	0.995	-0.00723157	0.0487522	0.127409	0.453329
P46379	Large proline-rich protein BAG6 OS=Homo sapiens GN=BAG6 PE=1 SV=2	1.004	0.00575927	0.147629	0.995	-0.00723157	0.0487522	0.0981908	0.527324
Q96K76	Ubiquitin carboxyl-terminal hydrolase 47 OS=Homo sapiens GN=USP47 PE=1 SV=3	0.999	-0.00144342	0.0986665	0.995	-0.00723157	0.0487522	0.0737094	0.682273
Q96AE4	Far upstream element-binding protein 1 OS=Homo sapiens GN=FUBP1 PE=1 SV=3	0.99	-0.0144996	0.00991132	0.995	-0.00723157	0.0487522	0.0293318	0.429089
O43143	Pre-mRNA-splicing factor ATP-dependent RNA helicase DHX15 OS=Homo sapiens GN=DHX15 PE=1 SV=2	0.984	-0.0232698	-0.049708	0.995	-0.00723157	0.0487522	-0.000477873	0.00269202
P27361	Mitogen-activated protein kinase 3 OS=Homo sapiens GN=MAPK3 PE=1 SV=4	0.98	-0.0291463	-0.0896567	0.995	-0.00723157	0.0487522	-0.0204522	0.0877435
P06576	ATP synthase subunit beta, mitochondrial OS=Homo sapiens GN=ATP5B PE=1 SV=3	0.979	-0.0306192	-0.0996698	0.995	-0.00723157	0.0487522	-0.0254588	0.102587
Q9NV70	Exocyst complex component 1 OS=Homo sapiens GN=EXOC1 PE=1 SV=4	0.973	-0.0394883	-0.159961	0.995	-0.00723157	0.0487522	-0.0556044	0.162202
P18615	Negative elongation factor E OS=Homo sapiens GN=NELFE PE=1 SV=3	0.964	-0.0528949	-0.251099	0.995	-0.00723157	0.0487522	-0.101173	0.206151
Q15814	Tubulin-specific chaperone C OS=Homo sapiens GN=TBCC PE=1 SV=2	0.933	-0.100051	-0.571663	0.995	-0.00723157	0.0487522	-0.261456	0.256364
O15042	U2 snRNP-associated SURP motif-containing protein OS=Homo sapiens GN=U2SURP PE=1 SV=2	0.916	-0.12658	-0.75201	0.995	-0.00723157	0.0487522	-0.351629	0.266631
P67870	Casein kinase II subunit beta OS=Homo sapiens GN=CSNK2B PE=1 SV=1	0.901	-0.150401	-0.91394	0.995	-0.00723157	0.0487522	-0.432594	0.272518
Q16774	Guanylate kinase OS=Homo sapiens GN=GUK1 PE=1 SV=2	1.089	0.123004	0.944654	0.994	-0.00868224	0.0390215	0.491838	0.32448
O75152	Zinc finger CCCH domain-containing protein 11A OS=Homo sapiens GN=ZC3H11A PE=1 SV=3	1.079	0.109695	0.854179	0.994	-0.00868224	0.0390215	0.4466	0.327037
Q5VZ89	DENN domain-containing protein 4C OS=Homo sapiens GN=DENND4C PE=1 SV=2	1.059	0.0827026	0.670687	0.994	-0.00868224	0.0390215	0.354854	0.334417
O00159	Unconventional myosin-Ic OS=Homo sapiens GN=MYO1C PE=1 SV=4	1.043	0.0607392	0.52138	0.994	-0.00868224	0.0390215	0.280201	0.344437
O75475	PC4 and SFRS1-interacting protein OS=Homo sapiens GN=PSIP1 PE=1 SV=1	1.024	0.0342157	0.341076	0.994	-0.00868224	0.0390215	0.190049	0.369083
Q9UHC7	E3 ubiquitin-protein ligase makorin-1 OS=Homo sapiens GN=MKRN1 PE=1 SV=3	1.023	0.0328061	0.331493	0.994	-0.00868224	0.0390215	0.185257	0.371198
O60885	Bromodomain-containing protein 4 OS=Homo sapiens GN=BRD4 PE=1 SV=2	1.018	0.0257376	0.283441	0.994	-0.00868224	0.0390215	0.161231	0.384151
Q9H7D0	Dedicator of cytokinesis protein 5 OS=Homo sapiens GN=DOCK5 PE=1 SV=3	1.013	0.0186342	0.235153	0.994	-0.00868224	0.0390215	0.137087	0.403059
Q99714	3-hydroxyacyl-CoA dehydrogenase type-2 OS=Homo sapiens GN=HSD17B10 PE=1 SV=3	1.002	0.00288251	0.128074	0.994	-0.00868224	0.0390215	0.0835475	0.506232
Q9UMY4	Sorting nexin-12 OS=Homo sapiens GN=SNX12 PE=1 SV=3	1.001	0.00144197	0.118282	0.994	-0.00868224	0.0390215	0.0786515	0.527047
Q969E8	Pre-rRNA-processing protein TSR2 homolog OS=Homo sapiens GN=TSR2 PE=1 SV=1	0.999	-0.00144342	0.0986665	0.994	-0.00868224	0.0390215	0.068844	0.584623
P05023	Sodium/potassium-transporting ATPase subunit alpha-1 OS=Homo sapiens GN=ATP1A1 PE=1 SV=1	0.995	-0.00723157	0.0593188	0.994	-0.00868224	0.0390215	0.0491702	0.88747
Q13838	Spliceosome RNA helicase DDX39B OS=Homo sapiens GN=DDX39B PE=1 SV=1	0.975	-0.0365259	-0.139822	0.994	-0.00868224	0.0390215	-0.0504004	0.171818
P60953	Cell division control protein 42 homolog OS=Homo sapiens GN=CDC42 PE=1 SV=2	0.972	-0.0409718	-0.170046	0.994	-0.00868224	0.0390215	-0.065512	0.191382
P42166	Lamina-associated polypeptide 2, isoform alpha OS=Homo sapiens GN=TMPO PE=1 SV=2	0.97	-0.0439433	-0.190246	0.994	-0.00868224	0.0390215	-0.0756122	0.201493
Q02880	DNA topoisomerase 2-beta OS=Homo sapiens GN=TOP2B PE=1 SV=3	0.968	-0.046921	-0.210489	0.994	-0.00868224	0.0390215	-0.0857335	0.209929
Q9NYH9	U3 small nucleolar RNA-associated protein 6 homolog OS=Homo sapiens GN=UTP6 PE=2 SV=2	0.967	-0.0484122	-0.220625	0.994	-0.00868224	0.0390215	-0.0908018	0.213643
Q6PJT7	Zinc finger CCCH domain-containing protein 14 OS=Homo sapiens GN=ZC3H14 PE=1 SV=1	0.966	-0.0499049	-0.230772	0.994	-0.00868224	0.0390215	-0.0958754	0.21707
Q16795	NADH dehydrogenase [ubiquinone] 1 alpha subcomplex subunit 9, mitochondrial OS=Homo sapiens GN=NDUFA9 PE=1 SV=2	0.929	-0.106249	-0.6138	0.994	-0.00868224	0.0390215	-0.287389	0.26727
Q96KB5	Lymphokine-activated killer T-cell-originated protein kinase OS=Homo sapiens GN=PBK PE=1 SV=3	0.918	-0.123434	-0.73062	0.994	-0.00868224	0.0390215	-0.345799	0.272484
P55795	Heterogeneous nuclear ribonucleoprotein H2 OS=Homo sapiens GN=HNRNPH2 PE=1 SV=1	0.893	-0.163268	-1.00141	0.994	-0.00868224	0.0390215	-0.481194	0.280011
Q13505	Metaxin-1 OS=Homo sapiens GN=MTX1 PE=1 SV=2	0.75	-0.415037	-2.71293	0.994	-0.00868224	0.0390215	-1.33695	0.293149
Q86UK7	Zinc finger protein 598 OS=Homo sapiens GN=ZNF598 PE=1 SV=1	1.049	0.0690147	0.577637	0.993	-0.0101344	0.0292805	0.303459	0.329979
Q9Y5M8	Signal recognition particle receptor subunit beta OS=Homo sapiens GN=SRPRB PE=1 SV=3	1.022	0.0313952	0.321901	0.993	-0.0101344	0.0292805	0.175591	0.354331
Q6P1J9	Parafibromin OS=Homo sapiens GN=CDC73 PE=1 SV=1	1.018	0.0257376	0.283441	0.993	-0.0101344	0.0292805	0.156361	0.362043
Q9NQP4	Prefoldin subunit 4 OS=Homo sapiens GN=PFDN4 PE=1 SV=1	1.011	0.015783	0.215771	0.993	-0.0101344	0.0292805	0.122526	0.382859
P52434	DNA-directed RNA polymerases I, II, and III subunit RPABC3 OS=Homo sapiens GN=POLR2H PE=1 SV=4	1.006	0.00863031	0.167147	0.993	-0.0101344	0.0292805	0.098214	0.409382
P10586	Receptor-type tyrosine-protein phosphatase F OS=Homo sapiens GN=PTPRF PE=1 SV=2	1.001	0.00144197	0.118282	0.993	-0.0101344	0.0292805	0.073781	0.461538
Q14008	Cytoskeleton-associated protein 5 OS=Homo sapiens GN=CKAP5 PE=1 SV=3	0.988	-0.0174171	-0.00992193	0.993	-0.0101344	0.0292805	0.00967926	0.149971
P61923	Coatomer subunit zeta-1 OS=Homo sapiens GN=COPZ1 PE=1 SV=1	0.987	-0.018878	-0.0198533	0.993	-0.0101344	0.0292805	0.00471356	0.0558527
P22314	Ubiquitin-like modifier-activating enzyme 1 OS=Homo sapiens GN=UBA1 PE=1 SV=3	0.974	-0.0380063	-0.149887	0.993	-0.0101344	0.0292805	-0.0603032	0.205639
P52888	Thimet oligopeptidase OS=Homo sapiens GN=THOP1 PE=1 SV=2	0.967	-0.0484122	-0.220625	0.993	-0.0101344	0.0292805	-0.0956724	0.233588
Q8N684	Cleavage and polyadenylation specificity factor subunit 7 OS=Homo sapiens GN=CPSF7 PE=1 SV=1	0.963	-0.0543923	-0.261278	0.993	-0.0101344	0.0292805	-0.115999	0.243328
P09661	U2 small nuclear ribonucleoprotein A' OS=Homo sapiens GN=SNRPA1 PE=1 SV=2	0.957	-0.0634092	-0.322574	0.993	-0.0101344	0.0292805	-0.146647	0.253655
O94901	SUN domain-containing protein 1 OS=Homo sapiens GN=SUN1 PE=1 SV=3	0.956	-0.0649175	-0.332828	0.993	-0.0101344	0.0292805	-0.151774	0.255032
O75934	Pre-mRNA-splicing factor SPF27 OS=Homo sapiens GN=BCAS2 PE=1 SV=1	0.953	-0.0694519	-0.363652	0.993	-0.0101344	0.0292805	-0.167186	0.258731
Q16401	26S proteasome non-ATPase regulatory subunit 5 OS=Homo sapiens GN=PSMD5 PE=1 SV=3	0.946	-0.0800879	-0.435956	0.993	-0.0101344	0.0292805	-0.203338	0.265445
P00568	Adenylate kinase isoenzyme 1 OS=Homo sapiens GN=AK1 PE=1 SV=3	0.945	-0.0816138	-0.446328	0.993	-0.0101344	0.0292805	-0.208524	0.266238
P49902	Cytosolic purine 5'-nucleotidase OS=Homo sapiens GN=NT5C2 PE=1 SV=1	1.132	0.178874	1.32446	0.992	-0.011588	0.0195301	0.671993	0.309261
O60884	DnaJ homolog subfamily A member 2 OS=Homo sapiens GN=DNAJA2 PE=1 SV=1	1.08	0.111031	0.863265	0.992	-0.011588	0.0195301	0.441397	0.313721
P19174	1-phosphatidylinositol 4,5-bisphosphate phosphodiesterase gamma-1 OS=Homo sapiens GN=PLCG1 PE=1 SV=1	1.066	0.0922074	0.7353	0.992	-0.011588	0.0195301	0.377415	0.315968
Q07954	Prolow-density lipoprotein receptor-related protein 1 OS=Homo sapiens GN=LRP1 PE=1 SV=2	1.057	0.0799754	0.652148	0.992	-0.011588	0.0195301	0.335839	0.317909
Q9NTK5	Obg-like ATPase 1 OS=Homo sapiens GN=OLA1 PE=1 SV=2	1.034	0.0482362	0.436386	0.992	-0.011588	0.0195301	0.227958	0.326493
Q9Y4L1	Hypoxia up-regulated protein 1 OS=Homo sapiens GN=HYOU1 PE=1 SV=1	1.021	0.0299829	0.312301	0.992	-0.011588	0.0195301	0.165916	0.337016
Q14258	E3 ubiquitin/ISG15 ligase TRIM25 OS=Homo sapiens GN=TRIM25 PE=1 SV=2	1.02	0.0285692	0.30269	0.992	-0.011588	0.0195301	0.16111	0.338205
Q10471	Polypeptide N-acetylgalactosaminyltransferase 2 OS=Homo sapiens GN=GALNT2 PE=1 SV=1	1.019	0.0271541	0.293071	0.992	-0.011588	0.0195301	0.156301	0.339477
Q92620	Pre-mRNA-splicing factor ATP-dependent RNA helicase PRP16 OS=Homo sapiens GN=DHX38 PE=1 SV=2	1.013	0.0186342	0.235153	0.992	-0.011588	0.0195301	0.127342	0.349452
Q9NS86	LanC-like protein 2 OS=Homo sapiens GN=LANCL2 PE=1 SV=1	1.012	0.0172093	0.225466	0.992	-0.011588	0.0195301	0.122498	0.351647
Q5JRA6	Melanoma inhibitory activity protein 3 OS=Homo sapiens GN=MIA3 PE=1 SV=1	1.006	0.00863031	0.167147	0.992	-0.011588	0.0195301	0.0933388	0.370641
Q04637	Eukaryotic translation initiation factor 4 gamma 1 OS=Homo sapiens GN=EIF4G1 PE=1 SV=4	0.997	-0.00433459	0.0790121	0.992	-0.011588	0.0195301	0.0492711	0.461259
P15374	Ubiquitin carboxyl-terminal hydrolase isozyme L3 OS=Homo sapiens GN=UCHL3 PE=1 SV=1	0.995	-0.00723157	0.0593188	0.992	-0.011588	0.0195301	0.0394245	0.526491
P41250	Glycine--tRNA ligase OS=Homo sapiens GN=GARS PE=1 SV=3	0.995	-0.00723157	0.0593188	0.992	-0.011588	0.0195301	0.0394245	0.526491
Q8N1B4	Vacuolar protein sorting-associated protein 52 homolog OS=Homo sapiens GN=VPS52 PE=1 SV=1	0.99	-0.0144996	0.00991132	0.992	-0.011588	0.0195301	0.0147207	0.696739
Q8IXH7	Negative elongation factor C/D OS=Homo sapiens GN=NELFCD PE=1 SV=2	0.99	-0.0144996	0.00991132	0.992	-0.011588	0.0195301	0.0147207	0.696739
Q96G03	Phosphoglucomutase-2 OS=Homo sapiens GN=PGM2 PE=1 SV=4	0.983	-0.0247367	-0.0596804	0.992	-0.011588	0.0195301	-0.0200751	0.154072
Q8NE71	ATP-binding cassette sub-family F member 1 OS=Homo sapiens GN=ABCF1 PE=1 SV=2	0.981	-0.027675	-0.0796544	0.992	-0.011588	0.0195301	-0.0300621	0.18504
O75663	TIP41-like protein OS=Homo sapiens GN=TIPRL PE=1 SV=2	0.978	-0.0320936	-0.109693	0.992	-0.011588	0.0195301	-0.0450812	0.213127
P61081	NEDD8-conjugating enzyme Ubc12 OS=Homo sapiens GN=UBE2M PE=1 SV=1	0.977	-0.0335695	-0.119726	0.992	-0.011588	0.0195301	-0.0500977	0.219725
Q9H0P0	Cytosolic 5'-nucleotidase 3A OS=Homo sapiens GN=NT5C3A PE=1 SV=3	0.971	-0.0424568	-0.180141	0.992	-0.011588	0.0195301	-0.0803052	0.245078
P29144	Tripeptidyl-peptidase 2 OS=Homo sapiens GN=TPP2 PE=1 SV=4	0.961	-0.0573917	-0.281667	0.992	-0.011588	0.0195301	-0.131068	0.264344
Q9NV06	DDB1- and CUL4-associated factor 13 OS=Homo sapiens GN=DCAF13 PE=1 SV=2	0.948	-0.077041	-0.415243	0.992	-0.011588	0.0195301	-0.197856	0.27579
O43491	Band 4.1-like protein 2 OS=Homo sapiens GN=EPB41L2 PE=1 SV=1	0.944	-0.0831412	-0.456712	0.992	-0.011588	0.0195301	-0.218591	0.278019
P35237	Serpin B6 OS=Homo sapiens GN=SERPINB6 PE=1 SV=3	0.942	-0.086201	-0.477512	0.992	-0.011588	0.0195301	-0.228991	0.278995
[truncated: 1,530 more rows]

## Sheet: Raw data for replicate 1
Checked	Protein FDR Confidence	Master	Accession	Description	Exp. q-value	Sum PEP Score	Coverage	# Peptides	# PSMs	# Unique Peptides	# Protein Groups	# AAs	MW [kDa]	calc. pI	Found in Sample: [S9] F3: 113, Sample, n/a	Found in Sample: [S10] F3: 114, Sample, n/a	Found in Sample: [S11] F3: 115, Sample, n/a	Found in Sample: [S12] F3: 116, Sample, n/a	Found in Sample: [S13] F3: 117, Sample, n/a	Found in Sample: [S14] F3: 118, Sample, n/a	Found in Sample: [S15] F3: 119, Sample, DMSO	Found in Sample: [S16] F3: 121, Sample, PAB 24h	Abundance Ratio: (PAB 24h) / (DMSO)	Abundances (Grouped): n/a	Abundances (Grouped): DMSO	Abundances (Grouped): PAB 24h	Abundances (Grouped) Standard Error [%]: n/a	Abundances (Grouped) Standard Error [%]: DMSO	Abundances (Grouped) Standard Error [%]: PAB 24h	Abundances (Grouped) Count: n/a	Abundances (Grouped) Count: DMSO	Abundances (Grouped) Count: PAB 24h	Abundances (Scaled): F3: 113, Sample, n/a	Abundances (Scaled): F3: 114, Sample, n/a	Abundances (Scaled): F3: 115, Sample, n/a	Abundances (Scaled): F3: 116, Sample, n/a	Abundances (Scaled): F3: 117, Sample, n/a	Abundances (Scaled): F3: 118, Sample, n/a	Abundances (Scaled): F3: 119, Sample, DMSO	Abundances (Scaled): F3: 121, Sample, PAB 24h	Abundances Count: F3: 113, Sample, n/a	Abundances Count: F3: 114, Sample, n/a	Abundances Count: F3: 115, Sample, n/a	Abundances Count: F3: 116, Sample, n/a	Abundances Count: F3: 117, Sample, n/a	Abundances Count: F3: 118, Sample, n/a	Abundances Count: F3: 119, Sample, DMSO	Abundances Count: F3: 121, Sample, PAB 24h	emPAI
FALSE	High	Master Protein	Q15149	Plectin OS=Homo sapiens GN=PLEC PE=1 SV=3	0	1471.32	45.538	192	502	187	1	4684	531.466	5.96	High	Not Found	High	Not Found	High	High	High	High	0.999	169	62	61.9	77.96			4	1	1	72.1		193.3		345.8	64.9	62	61.9	2		1		1	134	185	185	7.809
FALSE	High	Master Protein	Q09666	Neuroblast differentiation-associated protein AHNAK OS=Homo sapiens GN=AHNAK PE=1 SV=2	0	1188.23	56.4686	163	385	162	1	5890	628.699	6.15	Not Found	Not Found	High	Not Found	Not Found	High	High	High	1.077	280	115.5	124.4	82.4			2	1	1			443.2			116.9	115.5	124.4			1			98	158	158	3.633
FALSE	High	Master Protein	P78527	DNA-dependent protein kinase catalytic subunit OS=Homo sapiens GN=PRKDC PE=1 SV=3	0	697.607	30.0872	105	251	105	1	4128	468.788	7.12	Not Found	Not Found	High	Not Found	Not Found	High	High	High	0.956	321	80.8	77.2	100.83			2	1	1			549.9			92.1	80.8	77.2			1			61	93	93	3.698
FALSE	High	Master Protein	Q14204	Cytoplasmic dynein 1 heavy chain 1 OS=Homo sapiens GN=DYNC1H1 PE=1 SV=5	0	523.352	24.8816	98	171	98	1	4646	532.072	6.4	High	Not Found	Not Found	Not Found	Not Found	High	High	High	1.005	223.1	176.4	177.4	28.99			2	1	1	268.8					177.4	176.4	177.4	1					51	85	85	1.978
FALSE	High	Master Protein	Q13813	Spectrin alpha chain, non-erythrocytic 1 OS=Homo sapiens GN=SPTAN1 PE=1 SV=3	0	751.313	43.6489	94	216	94	1	2472	284.364	5.35	Not Found	Not Found	Not Found	Not Found	Not Found	High	High	High	1.028	263.2	264.6	272.2				1	1	1						263.2	264.6	272.2						53	95	95	5.952
FALSE	High	Master Protein	P35579	Myosin-9 OS=Homo sapiens GN=MYH9 PE=1 SV=4	0	1060.61	50.9694	96	646	87	1	1960	226.392	5.6	High	Not Found	Not Found	Not Found	Not Found	High	High	High	1.219	212.6	168.9	206	39.3			2	1	1	271.6					153.5	168.9	206	2					74	109	109	49.749
FALSE	High	Master Protein	P15924	Desmoplakin OS=Homo sapiens GN=DSP PE=1 SV=3	0	432.54	31.5569	87	187	87	1	2871	331.569	6.81	Not Found	Not Found	Not Found	High	Not Found	High	High	High	0.914	281.9	270.8	247.4				1	1	1						281.9	270.8	247.4						52	84	84	3.017
FALSE	High	Master Protein	Q92616	eIF-2-alpha kinase activator GCN1 OS=Homo sapiens GN=GCN1 PE=1 SV=6	0	385.571	32.8341	74	120	74	1	2671	292.572	7.47	Not Found	Not Found	Not Found	Not Found	Not Found	High	High	High	0.952	268.7	272.2	259.1				1	1	1						268.7	272.2	259.1						33	62	62	2.532
FALSE	High	Master Protein	Q9Y490	Talin-1 OS=Homo sapiens GN=TLN1 PE=1 SV=3	0	556.961	43.0933	82	156	73	1	2541	269.599	6.07	Not Found	Not Found	Not Found	Not Found	Not Found	High	High	High	0.98	274.6	265.4	260				1	1	1						274.6	265.4	260						42	69	69	4.918
FALSE	High	Master Protein	P21333	Filamin-A OS=Homo sapiens GN=FLNA PE=1 SV=4	0	710.428	38.5342	77	269	71	1	2647	280.564	6.06	High	Not Found	Not Found	Not Found	Not Found	High	High	High	1.101	229.8	162	178.4	32.57			2	1	1	282.7					176.8	162	178.4	1					55	76	76	7.994
FALSE	High	Master Protein	Q01082	Spectrin beta chain, non-erythrocytic 1 OS=Homo sapiens GN=SPTBN1 PE=1 SV=2	0	564.479	39.2555	76	167	67	1	2364	274.439	5.57	High	Not Found	Not Found	Not Found	Not Found	High	High	High	1.042	240.7	156	162.6	46.94			2	1	1	320.6					160.8	156	162.6	1					44	75	75	4.664
FALSE	High	Master Protein	Q7Z6Z7	E3 ubiquitin-protein ligase HUWE1 OS=Homo sapiens GN=HUWE1 PE=1 SV=3	0	372.804	21.3535	66	102	66	1	4374	481.589	5.22	Not Found	Not Found	Not Found	Not Found	Not Found	High	High	High	0.941	247.5	284.6	267.9				1	1	1						247.5	284.6	267.9						24	54	54	1.496
FALSE	High	Master Protein	O75369	Filamin-B OS=Homo sapiens GN=FLNB PE=1 SV=2	0	525.697	33.6664	67	177	61	1	2602	277.99	5.73	Not Found	Not Found	Not Found	High	Not Found	High	High	High	1.133	375.3	23.1	26.2	132.09			2	1	1				725.9		24.8	23.1	26.2				2		40	58	58	4.965
FALSE	High	Master Protein	P12270	Nucleoprotein TPR OS=Homo sapiens GN=TPR PE=1 SV=3	0	334.584	29.835	59	97	59	1	2363	267.131	5.02	High	Not Found	Not Found	Not Found	Not Found	High	High	High	1.018	277.7	121.2	123.3	78.97			2	1	1	432.8					122.7	121.2	123.3	1					34	53	53	2.816
FALSE	High	Master Protein	Q9P2E9	Ribosome-binding protein 1 OS=Homo sapiens GN=RRBP1 PE=1 SV=4	0	360.085	56.6667	59	105	58	1	1410	152.381	8.6	Not Found	Not Found	High	Not Found	Not Found	High	High	High	0.969	282.9	262.5	254.5				1	1	1						282.9	262.5	254.5						36	58	58	5.31
FALSE	High	Master Protein	Q9UPN3	Microtubule-actin cross-linking factor 1, isoforms 1/2/3/5 OS=Homo sapiens GN=MACF1 PE=1 SV=4	0	301.329	10.3276	62	79	58	1	7388	837.787	5.39	Not Found	Not Found	Not Found	Not Found	Not Found	High	High	High	1.024	232.1	280.6	287.3				1	1	1						232.1	280.6	287.3						23	53	53	0.424
FALSE	High	Master Protein	P46013	Antigen KI-67 OS=Homo sapiens GN=MKI67 PE=1 SV=2	0	255.193	27.2113	58	75	58	1	3256	358.474	9.45	Not Found	Not Found	Not Found	Not Found	Not Found	High	High	High	0.973	263.7	271.8	264.5				1	1	1						263.7	271.8	264.5						28	51	51	1.154
FALSE	High	Master Protein	Q14980	Nuclear mitotic apparatus protein 1 OS=Homo sapiens GN=NUMA1 PE=1 SV=2	0	389.902	35.5083	58	100	57	1	2115	238.115	5.78	Not Found	Not Found	Not Found	Not Found	Not Found	High	High	High	0.988	262.1	270.6	267.2				1	1	1						262.1	270.6	267.2						29	52	52	2.796
FALSE	High	Master Protein	P58107	Epiplakin OS=Homo sapiens GN=EPPK1 PE=1 SV=2	0	454.07	35.0884	59	126	56	1	5090	555.279	5.6	Not Found	Not Found	Not Found	Not Found	Not Found	High	High	High	1.083	229.7	273.8	296.5				1	1	1						229.7	273.8	296.5						22	44	44	0.89
FALSE	High	Master Protein	P18206	Vinculin OS=Homo sapiens GN=VCL PE=1 SV=4	0	362.66	53.1746	55	137	55	1	1134	123.722	5.66	Not Found	Not Found	High	Not Found	Not Found	High	High	High	1.055	377.1	22.2	23.5	132.65			2	1	1			730.9			23.4	22.2	23.5			3			38	52	52	10.469
FALSE	High	Master Protein	P35580	Myosin-10 OS=Homo sapiens GN=MYH10 PE=1 SV=3	0	488.798	36.8927	64	168	54	1	1976	228.858	5.54	Not Found	Not Found	Not Found	Not Found	Not Found	High	High	High	1.075	226	276.7	297.4				1	1	1						226	276.7	297.4						24	46	46	6.216
FALSE	High	Master Protein	P49327	Fatty acid synthase OS=Homo sapiens GN=FASN PE=1 SV=3	0	384.102	27.8375	55	128	54	1	2511	273.254	6.44	Not Found	Not Found	Not Found	Not Found	Not Found	High	High	High	0.931	267.2	276	256.9				1	1	1						267.2	276	256.9						33	51	51	3.642
FALSE	High	Master Protein	Q86UP2	Kinectin OS=Homo sapiens GN=KTN1 PE=1 SV=1	0	312.851	41.7097	49	88	49	1	1357	156.179	5.64	Not Found	Not Found	Not Found	Not Found	Not Found	High	High	High	0.936	267.9	274.8	257.3				1	1	1						267.9	274.8	257.3						27	49	49	4.867
FALSE	High	Master Protein	Q5T4S7	E3 ubiquitin-protein ligase UBR4 OS=Homo sapiens GN=UBR4 PE=1 SV=1	0	263.402	13.1005	48	68	48	1	5183	573.476	6.04	Not Found	Not Found	Not Found	Not Found	Not Found	High	High	High	0.982	268.6	268.1	263.4				1	1	1						268.6	268.1	263.4						20	37	37	0.682
FALSE	High	Master Protein	P46940	Ras GTPase-activating-like protein IQGAP1 OS=Homo sapiens GN=IQGAP1 PE=1 SV=1	0	404.888	34.6409	48	160	46	1	1657	189.134	6.48	High	Not Found	Not Found	Not Found	Not Found	High	High	High	1	239.3	160.7	160.7	42.84			2	1	1	311.7					166.8	160.7	160.7	1					33	50	50	8.761
FALSE	High	Master Protein	P49792	E3 SUMO-protein ligase RanBP2 OS=Homo sapiens GN=RANBP2 PE=1 SV=2	0	296.819	26.2407	62	96	44	1	3224	357.974	6.2	Not Found	Not Found	Not Found	High	Not Found	High	High	High	1.009	380.7	19.2	19.4	136.03			2	1	1				746.9		14.5	19.2	19.4				1		24	54	54	1.534
FALSE	High	Master Protein	O75643	U5 small nuclear ribonucleoprotein 200 kDa helicase OS=Homo sapiens GN=SNRNP200 PE=1 SV=2	0	299.336	25.1404	44	94	43	1	2136	244.353	6.06	Not Found	Not Found	Not Found	Not Found	Not Found	High	High	High	1.032	222.7	284.1	293.2				1	1	1						222.7	284.1	293.2						18	40	40	2.46
FALSE	High	Master Protein	Q14789	Golgin subfamily B member 1 OS=Homo sapiens GN=GOLGB1 PE=1 SV=2	0	211.932	18.5333	44	52	43	1	3259	375.79	5	Not Found	Not Found	Not Found	Not Found	Not Found	High	High	High	1.025	241.9	275.7	282.4				1	1	1						241.9	275.7	282.4						16	35	35	0.65
FALSE	High	Master Protein	P42704	Leucine-rich PPR motif-containing protein, mitochondrial OS=Homo sapiens GN=LRPPRC PE=1 SV=3	0	235.846	30.3443	42	85	42	1	1394	157.805	6.13	High	Not Found	Not Found	Not Found	Not Found	High	High	High	0.958	351.6	49.5	47.4	119.74			2	1	1	649.2					53.9	49.5	47.4	1					29	42	42	3.437
FALSE	High	Master Protein	P31327	Carbamoyl-phosphate synthase [ammonia], mitochondrial OS=Homo sapiens GN=CPS1 PE=1 SV=2	0	364.717	34.6667	42	118	40	1	1500	164.835	6.74	Not Found	Not Found	Not Found	Not Found	Not Found	High	High	High	1.019	283.3	255.9	260.8				1	1	1						283.3	255.9	260.8						32	48	48	8.507
FALSE	High	Master Protein	Q9NZM1	Myoferlin OS=Homo sapiens GN=MYOF PE=1 SV=1	0	242.14	22.7074	40	77	40	1	2061	234.561	6.18	Not Found	Not Found	Not Found	Not Found	Not Found	High	High	High	1.042	256.2	266.3	277.5				1	1	1						256.2	266.3	277.5						24	40	40	1.689
FALSE	High	Master Protein	Q14152	Eukaryotic translation initiation factor 3 subunit A OS=Homo sapiens GN=EIF3A PE=1 SV=1	0	227.284	28.5094	39	74	39	1	1382	166.468	6.79	Not Found	Not Found	Not Found	Not Found	Not Found	High	High	High	0.92	278.6	271.6	249.8				1	1	1						278.6	271.6	249.8						28	40	40	3.04
FALSE	High	Master Protein	Q9C0C2	182 kDa tankyrase-1-binding protein OS=Homo sapiens GN=TNKS1BP1 PE=1 SV=4	0	291.549	37.1891	39	66	39	1	1729	181.685	4.86	High	Not Found	Not Found	Not Found	Not Found	High	High	High	0.958	295.6	106.6	102.1	108.15			2	1	1	521.7					69.6	106.6	102.1	1					12	34	34	3.417
FALSE	High	Master Protein	Q00610	Clathrin heavy chain 1 OS=Homo sapiens GN=CLTC PE=1 SV=5	0	335.763	28.9552	37	118	37	1	1675	191.493	5.69	Not Found	Not Found	Not Found	Not Found	Not Found	High	High	High	0.994	253.9	273.9	272.3				1	1	1						253.9	273.9	272.3						22	35	35	4.325
FALSE	High	Master Protein	Q92878	DNA repair protein RAD50 OS=Homo sapiens GN=RAD50 PE=1 SV=1	0	147.212	28.2012	37	54	37	1	1312	153.797	6.89	High	Not Found	Not Found	Not Found	Not Found	High	High	High	0.97	299.9	101.6	98.5	99.36			2	1	1	510.6					89.2	101.6	98.5	1					20	36	36	2.125
FALSE	High	Master Protein	P07814	Bifunctional glutamate/proline--tRNA ligase OS=Homo sapiens GN=EPRS PE=1 SV=5	0	252.759	27.0503	36	96	36	1	1512	170.483	7.33	High	Not Found	Not Found	Not Found	Not Found	High	High	High	0.956	249.6	153.8	147.1	40.22			2	1	1	320.6					178.6	153.8	147.1	1					25	35	35	3.309
FALSE	High	Master Protein	Q13428	Treacle protein OS=Homo sapiens GN=TCOF1 PE=1 SV=3	0	185.779	25.672	35	55	35	1	1488	152.015	9.04	Not Found	Not Found	Not Found	Not Found	Not Found	High	High	High	0.967	277	266	257.1				1	1	1						277	266	257.1						22	34	34	2.894
FALSE	High	Master Protein	P52272	Heterogeneous nuclear ribonucleoprotein M OS=Homo sapiens GN=HNRNPM PE=1 SV=3	0	224.12	50.8219	34	85	34	1	730	77.464	8.7	Not Found	Not Found	High	Not Found	Not Found	High	High	High	0.94	347.3	54.3	51.1	115.63			2	1	1			631.3			63.3	54.3	51.1			1			30	39	39	10.823
FALSE	High	Master Protein	Q6P2Q9	Pre-mRNA-processing-splicing factor 8 OS=Homo sapiens GN=PRPF8 PE=1 SV=2	0	178.036	17.4732	34	61	34	1	2335	273.427	8.84	Not Found	Not Found	Not Found	Not Found	Not Found	High	High	High	0.987	267.1	268.2	264.7				1	1	1						267.1	268.2	264.7						16	27	27	1.154
FALSE	High	Master Protein	P30622	CAP-Gly domain-containing linker protein 1 OS=Homo sapiens GN=CLIP1 PE=1 SV=2	0	138.239	27.1905	34	40	34	1	1438	162.147	5.36	Not Found	Not Found	Not Found	Not Found	Not Found	High	High	High	1.106	206.6	281.8	311.6				1	1	1						206.6	281.8	311.6						13	31	31	1.301
FALSE	High	Master Protein	P52789	Hexokinase-2 OS=Homo sapiens GN=HK2 PE=1 SV=2	0	297.444	43.1843	32	113	32	1	917	102.313	6.05	Not Found	Not Found	Not Found	Not Found	Not Found	High	High	High	1.018	234.2	280.3	285.5				1	1	1						234.2	280.3	285.5						23	32	32	13.785
FALSE	High	Master Protein	Q04637	Eukaryotic translation initiation factor 4 gamma 1 OS=Homo sapiens GN=EIF4G1 PE=1 SV=4	0	189.439	27.3296	35	69	32	1	1599	175.382	5.33	Not Found	Not Found	Not Found	Not Found	High	High	High	High	0.992	380	20.1	19.9	133.9			2	1	1					739.8	20.2	20.1	19.9					1	24	34	34	4.337
FALSE	High	Master Protein	P53621	Coatomer subunit alpha OS=Homo sapiens GN=COPA PE=1 SV=2	0	145.427	30.719	32	65	32	1	1224	138.258	7.66	Not Found	Not Found	Not Found	Not Found	Not Found	High	High	High	0.961	285	262.6	252.3				1	1	1						285	262.6	252.3						19	29	29	2.605
FALSE	High	Master Protein	Q8IVF2	Protein AHNAK2 OS=Homo sapiens GN=AHNAK2 PE=1 SV=2	0	135.298	17.2563	33	41	32	1	5795	616.242	5.36	Not Found	Not Found	High	Not Found	Not Found	High	High	High	0.997	388.8	11.2	11.2	139.07			2	1	1			771.2			6.5	11.2	11.2			1			7	23	23	0.275
FALSE	High	Master Protein	P49588	Alanine--tRNA ligase, cytoplasmic OS=Homo sapiens GN=AARS PE=1 SV=2	0	286.675	40.2893	31	105	31	1	968	106.743	5.53	Not Found	Not Found	High	Not Found	Not Found	High	High	High	1.048	355.6	43.3	45.4	125.09			2	1	1			670.2			41.1	43.3	45.4			1			24	33	33	10.721
FALSE	High	Master Protein	Q07065	Cytoskeleton-associated protein 4 OS=Homo sapiens GN=CKAP4 PE=1 SV=2	0	253.481	55.9801	32	88	31	1	602	65.983	5.92	Not Found	Not Found	Not Found	Not Found	Not Found	High	High	High	0.925	289.6	265.1	245.3				1	1	1						289.6	265.1	245.3						26	32	32	13.091
FALSE	High	Master Protein	Q00341	Vigilin OS=Homo sapiens GN=HDLBP PE=1 SV=2	0	182.327	31.3091	31	60	31	1	1268	141.368	6.87	Not Found	Not Found	Not Found	Not Found	Not Found	High	High	High	1.021	301	246.9	252.1				1	1	1						301	246.9	252.1						20	30	30	2.594
FALSE	High	Master Protein	O43707	Alpha-actinin-4 OS=Homo sapiens GN=ACTN4 PE=1 SV=2	0	361.342	49.2865	45	133	30	1	911	104.788	5.44	Not Found	Not Found	Not Found	Not Found	Not Found	High	High	High	1.021	257.7	268.3	273.9				1	1	1						257.7	268.3	273.9						31	44	44	20.544
FALSE	High	Master Protein	P22102	Trifunctional purine biosynthetic protein adenosine-3 OS=Homo sapiens GN=GART PE=1 SV=1	0	204.94	38.4158	30	59	30	1	1010	107.699	6.7	Not Found	Not Found	Not Found	Not Found	Not Found	High	High	High	0.938	259.1	279.2	261.7				1	1	1						259.1	279.2	261.7						16	25	25	4.843
FALSE	High	Master Protein	P02545	Prelamin-A/C OS=Homo sapiens GN=LMNA PE=1 SV=1	0	270.858	47.741	31	132	29	1	664	74.095	7.02	Not Found	Not Found	High	Not Found	Not Found	High	High	High	1.001	322.2	77.8	77.8	105.95			2	1	1			563.6			80.8	77.8	77.8			1			32	33	33	21.675
FALSE	High	Master Protein	P27816	Microtubule-associated protein 4 OS=Homo sapiens GN=MAP4 PE=1 SV=3	0	176.65	31.4236	29	57	29	1	1152	120.93	5.43	High	Not Found	Not Found	Not Found	Not Found	High	High	High	0.933	296.1	107.5	100.3	76.29			2	1	1	455.8					136.4	107.5	100.3	1					20	26	26	3.084
FALSE	High	Master Protein	Q9UQE7	Structural maintenance of chromosomes protein 3 OS=Homo sapiens GN=SMC3 PE=1 SV=2	0	167.571	27.6089	29	48	29	1	1217	141.454	7.18	Not Found	Not Found	Not Found	Not Found	Not Found	High	High	High	1.003	279.3	259.9	260.8				1	1	1						279.3	259.9	260.8						11	25	25	2.075
FALSE	High	Master Protein	Q9NQW6	Actin-binding protein anillin OS=Homo sapiens GN=ANLN PE=1 SV=2	0	143.137	32.2064	29	48	29	1	1124	124.122	8.07	Not Found	Not Found	Not Found	Not Found	Not Found	High	High	High	1.182	241	256.2	302.8				1	1	1						241	256.2	302.8						16	27	27	3.084
FALSE	High	Master Protein	P33176	Kinesin-1 heavy chain OS=Homo sapiens GN=KIF5B PE=1 SV=1	0	150.985	33.2295	29	47	29	1	963	109.617	6.51	Not Found	Not Found	Not Found	Not Found	Not Found	High	High	High	1.079	306.8	237.2	256				1	1	1						306.8	237.2	256						17	28	28	3.217
FALSE	High	Master Protein	Q92621	Nuclear pore complex protein Nup205 OS=Homo sapiens GN=NUP205 PE=1 SV=3	0	167.386	17.5447	29	46	29	1	2012	227.776	6.19	Not Found	Not Found	Not Found	Not Found	Not Found	High	High	High	0.991	285.6	258.3	256				1	1	1						285.6	258.3	256						14	25	25	1.48
FALSE	High	Master Protein	Q9NTJ3	Structural maintenance of chromosomes protein 4 OS=Homo sapiens GN=SMC4 PE=1 SV=2	0	147.164	26.0093	29	45	29	1	1288	147.091	6.79	Not Found	Not Found	Not Found	Not Found	Not Found	High	High	High	0.953	212.8	300.7	286.5				1	1	1						212.8	300.7	286.5						13	26	26	1.703
FALSE	High	Master Protein	P55072	Transitional endoplasmic reticulum ATPase OS=Homo sapiens GN=VCP PE=1 SV=4	0	274.032	44.7891	28	115	28	1	806	89.266	5.26	Not Found	Not Found	Not Found	Not Found	Not Found	High	High	High	1.012	225.1	285.7	289.1				1	1	1						225.1	285.7	289.1						16	28	28	13.678
FALSE	High	Master Protein	P26640	Valine--tRNA ligase OS=Homo sapiens GN=VARS PE=1 SV=4	0	184.105	27.2152	28	62	28	1	1264	140.387	7.59	Not Found	Not Found	Not Found	Not Found	Not Found	High	High	High	0.94	293.9	260.8	245.3				1	1	1						293.9	260.8	245.3						14	26	26	3.252
FALSE	High	Master Protein	Q14203	Dynactin subunit 1 OS=Homo sapiens GN=DCTN1 PE=1 SV=3	0	206.626	28.7167	28	57	28	1	1278	141.607	5.81	High	Not Found	Not Found	Not Found	Not Found	High	High	High	0.997	312.4	87.7	87.5	101.55			2	1	1	536.7					88.1	87.7	87.5	1					12	25	25	2.956
FALSE	High	Master Protein	O95347	Structural maintenance of chromosomes protein 2 OS=Homo sapiens GN=SMC2 PE=1 SV=2	0	137.841	24.6449	28	48	28	1	1197	135.572	8.43	Not Found	Not Found	Not Found	Not Found	Not Found	High	High	High	0.96	246	282.7	271.4				1	1	1						246	282.7	271.4						13	24	24	2.162
FALSE	High	Master Protein	O75534	Cold shock domain-containing protein E1 OS=Homo sapiens GN=CSDE1 PE=1 SV=2	0	113.137	34.8371	28	40	28	1	798	88.829	6.25	Not Found	Not Found	Not Found	Not Found	Not Found	High	High	High	0.925	303.3	258.1	238.6				1	1	1						303.3	258.1	238.6						20	27	27	3.047
FALSE	High	Master Protein	Q63HN8	E3 ubiquitin-protein ligase RNF213 OS=Homo sapiens GN=RNF213 PE=1 SV=3	0	123.555	7.14423	28	35	28	1	5207	591.03	6.48	Not Found	Not Found	Not Found	Not Found	Not Found	High	High	High	0.97	269.6	269.2	261.2				1	1	1						269.6	269.2	261.2						13	24	24	0.265
FALSE	High	Master Protein	P14618	Pyruvate kinase PKM OS=Homo sapiens GN=PKM PE=1 SV=4	0	363.014	53.8606	27	436	27	1	531	57.9	7.84	Not Found	Not Found	High	Not Found	Not Found	High	High	High	1.01	278.1	121.3	122.5	87.48			2	1	1			450.1			106.1	121.3	122.5			1			28	31	31	63.686
FALSE	High	Master Protein	P22314	Ubiquitin-like modifier-activating enzyme 1 OS=Homo sapiens GN=UBA1 PE=1 SV=3	0	221.379	31.0964	27	120	27	1	1058	117.774	5.76	High	Not Found	Not Found	Not Found	Not Found	High	High	High	0.993	235.7	164.9	163.7	35.01			2	1	1	294.1					177.4	164.9	163.7	1					22	27	27	5.072
FALSE	High	Master Protein	P55060	Exportin-2 OS=Homo sapiens GN=CSE1L PE=1 SV=3	0	175.258	26.7765	27	71	27	1	971	110.346	5.77	Not Found	Not Found	Not Found	Not Found	Not Found	High	High	High	0.975	311.7	247.2	241.1				1	1	1						311.7	247.2	241.1						23	26	26	4.968
FALSE	High	Master Protein	Q86VP6	Cullin-associated NEDD8-dissociated protein 1 OS=Homo sapiens GN=CAND1 PE=1 SV=2	0	183.91	24.7154	27	70	27	1	1230	136.289	5.78	Not Found	Not Found	Not Found	Not Found	Not Found	High	High	High	0.968	275.9	266.3	257.8				1	1	1						275.9	266.3	257.8						19	23	23	3.354
FALSE	High	Master Protein	P49748	Very long-chain specific acyl-CoA dehydrogenase, mitochondrial OS=Homo sapiens GN=ACADVL PE=1 SV=1	0	192.793	48.7023	27	68	27	1	655	70.345	8.75	High	Not Found	Not Found	Not Found	Not Found	High	High	High	0.986	276.9	123.9	122.2	89.2			2	1	1	451.6					102.3	123.9	122.2	1					13	27	27	11.328
FALSE	High	Master Protein	Q9UQ35	Serine/arginine repetitive matrix protein 2 OS=Homo sapiens GN=SRRM2 PE=1 SV=2	0	184.473	14.0262	27	50	27	1	2752	299.438	12.06	Not Found	Not Found	Not Found	Not Found	Not Found	High	High	High	0.972	252.6	277.6	269.9				1	1	1						252.6	277.6	269.9						14	27	27	0.902
FALSE	High	Master Protein	P35573	Glycogen debranching enzyme OS=Homo sapiens GN=AGL PE=1 SV=3	0	120.496	18.4726	27	43	27	1	1532	174.652	6.76	Not Found	Not Found	Not Found	Not Found	Not Found	High	High	High	0.906	297.1	263.8	239				1	1	1						297.1	263.8	239						15	23	23	1.325
FALSE	High	Master Protein	P10809	60 kDa heat shock protein, mitochondrial OS=Homo sapiens GN=HSPD1 PE=1 SV=2	0	308.092	64.5724	26	288	26	1	573	61.016	5.87	Not Found	Not Found	Not Found	Not Found	Not Found	High	High	High	1.172	252.6	252	295.4				1	1	1						252.6	252	295.4						17	26	26	32.711
FALSE	High	Master Protein	P49368	T-complex protein 1 subunit gamma OS=Homo sapiens GN=CCT3 PE=1 SV=4	0	219.822	54.3119	26	113	26	1	545	60.495	6.49	Not Found	Not Found	Not Found	Not Found	Not Found	High	High	High	0.937	287.7	264.5	247.8				1	1	1						287.7	264.5	247.8						21	28	28	20.984
FALSE	High	Master Protein	Q9BQG0	Myb-binding protein 1A OS=Homo sapiens GN=MYBBP1A PE=1 SV=2	0	127.51	22.2139	26	42	26	1	1328	148.762	9.28	Not Found	Not Found	Not Found	Not Found	Not Found	High	High	High	0.96	225.5	293.1	281.4				1	1	1						225.5	293.1	281.4						6	22	22	1.694
FALSE	High	Master Protein	P49321	Nuclear autoantigenic sperm protein OS=Homo sapiens GN=NASP PE=1 SV=2	0	201.953	46.1929	25	221	25	1	788	85.186	4.3	Not Found	Not Found	Not Found	Not Found	Not Found	High	High	High	1.02	235.6	279.3	285.1				1	1	1						235.6	279.3	285.1						10	24	24	7.577
FALSE	High	Master Protein	P38646	Stress-70 protein, mitochondrial OS=Homo sapiens GN=HSPA9 PE=1 SV=2	0	245.167	43.0044	26	132	25	1	679	73.635	6.16	Not Found	Not Found	Not Found	Not Found	High	High	High	High	1.11	375.6	23.1	25.6	133.51			2	1	1					730.2	21	23.1	25.6					1	20	29	29	15.876
FALSE	High	Master Protein	P16615	Sarcoplasmic/endoplasmic reticulum calcium ATPase 2 OS=Homo sapiens GN=ATP2A2 PE=1 SV=1	0	205.932	29.6545	25	67	25	1	1042	114.683	5.34	Not Found	Not Found	High	Not Found	Not Found	High	High	High	0.945	372	28.7	27.2	129.31			2	1	1			712.2			31.9	28.7	27.2			1			18	23	23	6.743
FALSE	High	Master Protein	P11586	C-1-tetrahydrofolate synthase, cytoplasmic OS=Homo sapiens GN=MTHFD1 PE=1 SV=3	0	141.868	29.4118	25	48	25	1	935	101.495	7.3	Not Found	Not Found	Not Found	Not Found	Not Found	High	High	High	0.929	256.8	281.6	261.6				1	1	1						256.8	281.6	261.6						19	23	23	2.981
FALSE	High	Master Protein	Q16891	MICOS complex subunit MIC60 OS=Homo sapiens GN=IMMT PE=1 SV=1	0	145.265	36.6755	25	48	25	1	758	83.626	6.48	Not Found	Not Found	Not Found	Not Found	Not Found	High	High	High	1.009	277.3	260.2	262.5				1	1	1						277.3	260.2	262.5						16	24	24	3.778
FALSE	High	Master Protein	P33991	DNA replication licensing factor MCM4 OS=Homo sapiens GN=MCM4 PE=1 SV=5	0	145.676	36.2688	25	47	25	1	863	96.498	6.74	Not Found	Not Found	Not Found	Not Found	Not Found	High	High	High	0.972	313	247	240				1	1	1						313	247	240						14	20	20	3.437
FALSE	High	Master Protein	O60763	General vesicular transport factor p115 OS=Homo sapiens GN=USO1 PE=1 SV=2	0	179.51	31.289	25	47	25	1	962	107.828	4.91	Not Found	Not Found	Not Found	Not Found	Not Found	High	High	High	1.013	226.5	285	288.5				1	1	1						226.5	285	288.5						13	22	22	5.144
FALSE	High	Master Protein	P47897	Glutamine--tRNA ligase OS=Homo sapiens GN=QARS PE=1 SV=1	0	154.318	39.0968	25	46	25	1	775	87.743	7.15	Not Found	Not Found	Not Found	Not Found	Not Found	High	High	High	0.956	284.8	263.4	251.9				1	1	1						284.8	263.4	251.9						11	21	21	4.315
FALSE	High	Master Protein	P11717	Cation-independent mannose-6-phosphate receptor OS=Homo sapiens GN=IGF2R PE=1 SV=3	0	117.413	13.3681	25	32	25	1	2491	274.199	5.94	Not Found	Not Found	Not Found	Not Found	Not Found	High	High	High	0.853	320.4	258.9	220.7				1	1	1						320.4	258.9	220.7						13	20	20	0.61
FALSE	High	Master Protein	O60437	Periplakin OS=Homo sapiens GN=PPL PE=1 SV=4	0	93.98	16.1731	26	31	25	1	1756	204.623	5.6	Not Found	Not Found	Not Found	Not Found	Not Found	High	High	High	0.88	284.4	274.3	241.3				1	1	1						284.4	274.3	241.3						13	22	22	0.612
FALSE	High	Master Protein	P48643	T-complex protein 1 subunit epsilon OS=Homo sapiens GN=CCT5 PE=1 SV=1	0	226.579	60.2588	25	101	24	1	541	59.633	5.66	High	Not Found	Not Found	Not Found	Not Found	High	High	High	0.979	264.1	137.4	134.4	59.81			2	1	1	375.8					152.4	137.4	134.4	1					18	23	23	19.691
FALSE	High	Master Protein	P53396	ATP-citrate synthase OS=Homo sapiens GN=ACLY PE=1 SV=3	0	147.816	23.5241	24	59	24	1	1101	120.762	7.33	Not Found	Not Found	Not Found	Not Found	Not Found	High	High	High	0.932	284.7	266.8	248.5				1	1	1						284.7	266.8	248.5						17	20	20	2.82
FALSE	High	Master Protein	O00410	Importin-5 OS=Homo sapiens GN=IPO5 PE=1 SV=4	0	167.242	29.9909	24	57	24	1	1097	123.55	4.94	Not Found	Not Found	Not Found	Not Found	Not Found	High	High	High	0.959	276.1	267.5	256.4				1	1	1						276.1	267.5	256.4						13	19	19	3.467
FALSE	High	Master Protein	Q9Y678	Coatomer subunit gamma-1 OS=Homo sapiens GN=COPG1 PE=1 SV=1	0	200.771	41.5332	27	52	24	1	874	97.655	5.47	Not Found	Not Found	Not Found	Not Found	Not Found	High	High	High	0.957	237.4	287.5	275.1				1	1	1						237.4	287.5	275.1						9	23	23	5.713
FALSE	High	Master Protein	P35221	Catenin alpha-1 OS=Homo sapiens GN=CTNNA1 PE=1 SV=1	0	177.883	36.6446	24	44	24	1	906	100.009	6.29	Not Found	Not Found	Not Found	Not Found	Not Found	High	High	High	0.868	241.9	298.7	259.3				1	1	1						241.9	298.7	259.3						10	18	18	3.112
FALSE	High	Master Protein	O94979	Protein transport protein Sec31A OS=Homo sapiens GN=SEC31A PE=1 SV=3	0	135.829	24.5082	24	40	24	1	1220	132.931	6.89	High	Not Found	Not Found	Not Found	Not Found	High	High	High	0.929	314.3	88.9	82.6	111.03			2	1	1	561					67.5	88.9	82.6	1					11	20	20	3.38
FALSE	High	Master Protein	Q14683	Structural maintenance of chromosomes protein 1A OS=Homo sapiens GN=SMC1A PE=1 SV=2	0	115.411	19.7891	24	39	24	1	1233	143.144	7.64	Not Found	Not Found	Not Found	Not Found	Not Found	High	High	High	1.017	215.5	289.7	294.7				1	1	1						215.5	289.7	294.7						12	23	23	1.31
FALSE	High	Master Protein	Q14C86	GTPase-activating protein and VPS9 domain-containing protein 1 OS=Homo sapiens GN=GAPVD1 PE=1 SV=2	0	118.169	19.4181	24	30	24	1	1478	164.876	5.22	Not Found	Not Found	Not Found	Not Found	Not Found	High	High	High	0.981	250.5	277.3	272.2				1	1	1						250.5	277.3	272.2						8	20	20	1.239
FALSE	High	Master Protein	P14625	Endoplasmin OS=Homo sapiens GN=HSP90B1 PE=1 SV=1	0	213.339	32.3786	24	256	23	1	803	92.411	4.84	Not Found	Not Found	Not Found	Not Found	Not Found	High	High	High	1.016	248.9	273.3	277.7				1	1	1						248.9	273.3	277.7						21	25	25	7.348
FALSE	High	Master Protein	P08670	Vimentin OS=Homo sapiens GN=VIM PE=1 SV=4	0	238.755	58.3691	26	230	23	1	466	53.619	5.12	Not Found	Not Found	Not Found	Not Found	Not Found	High	High	High	1.095	254.8	260.3	285				1	1	1						254.8	260.3	285						21	29	29	40.462
FALSE	High	Master Protein	P13639	Elongation factor 2 OS=Homo sapiens GN=EEF2 PE=1 SV=4	0	230.659	34.2657	24	149	23	1	858	95.277	6.83	High	Not Found	Not Found	Not Found	Not Found	High	High	High	1.022	380.6	19.2	19.6	133.86			2	1	1	740.8					20.3	19.2	19.6	2					17	25	25	7.432
FALSE	High	Master Protein	P07237	Protein disulfide-isomerase OS=Homo sapiens GN=P4HB PE=1 SV=3	0	199.984	50.7874	23	125	23	1	508	57.081	4.87	Not Found	Not Found	Not Found	Not Found	Not Found	High	High	High	1.004	266.1	266.4	267.5				1	1	1						266.1	266.4	267.5						19	24	24	14.849
FALSE	High	Master Protein	P12814	Alpha-actinin-1 OS=Homo sapiens GN=ACTN1 PE=1 SV=2	0	330.053	45.6278	38	109	23	1	892	102.993	5.41	Not Found	Not Found	Not Found	Not Found	Not Found	High	High	High	1.032	302.5	244.9	252.6				1	1	1						302.5	244.9	252.6						18	26	26	12.525
FALSE	High	Master Protein	P50991	T-complex protein 1 subunit delta OS=Homo sapiens GN=CCT4 PE=1 SV=4	0	242.979	53.6178	24	98	23	1	539	57.888	7.83	Not Found	Not Found	Not Found	Not Found	Not Found	High	High	High	0.961	286.7	261.7	251.5				1	1	1						286.7	261.7	251.5						17	22	22	12.539
FALSE	High	Master Protein	P19338	Nucleolin OS=Homo sapiens GN=NCL PE=1 SV=3	0	125.551	29.0141	23	91	23	1	710	76.568	4.7	Not Found	Not Found	Not Found	Not Found	Not Found	High	High	High	1.02	287.4	253.7	258.9				1	1	1						287.4	253.7	258.9						20	23	23	4.623
FALSE	High	Master Protein	P34932	Heat shock 70 kDa protein 4 OS=Homo sapiens GN=HSPA4 PE=1 SV=4	0	209.671	35.9524	24	80	23	1	840	94.271	5.19	Not Found	Not Found	Not Found	Not Found	Not Found	High	High	High	0.972	271	268.3	260.7				1	1	1						271	268.3	260.7						18	25	25	5.723
FALSE	High	Master Protein	P09874	Poly [ADP-ribose] polymerase 1 OS=Homo sapiens GN=PARP1 PE=1 SV=4	0	156.547	24.5562	23	56	23	1	1014	113.012	8.88	Not Found	Not Found	Not Found	Not Found	Not Found	High	High	High	0.944	282.3	266.2	251.5				1	1	1						282.3	266.2	251.5						16	24	24	3.314
FALSE	High	Master Protein	P33992	DNA replication licensing factor MCM5 OS=Homo sapiens GN=MCM5 PE=1 SV=5	0	132.904	36.1035	23	37	23	1	734	82.233	8.37	Not Found	Not Found	Not Found	Not Found	Not Found	High	High	High	1.006	275.2	261.6	263.3				1	1	1						275.2	261.6	263.3						12	20	20	3.642
FALSE	High	Master Protein	P27708	CAD protein OS=Homo sapiens GN=CAD PE=1 SV=3	0	107.096	14.4719	25	32	23	1	2225	242.829	6.46	Not Found	Not Found	Not Found	Not Found	Not Found	High	High	High	0.964	259	275.4	265.6				1	1	1						259	275.4	265.6						10	20	20	0.796
FALSE	High	Master Protein	Q9UIG0	Tyrosine-protein kinase BAZ1B OS=Homo sapiens GN=BAZ1B PE=1 SV=2	0	108.417	18.1389	23	31	23	1	1483	170.796	8.48	Not Found	Not Found	Not Found	Not Found	Not Found	High	High	High	0.991	283	259.7	257.3				1	1	1						283	259.7	257.3						16	22	22	1.038
FALSE	High	Master Protein	Q15075	Early endosome antigen 1 OS=Homo sapiens GN=EEA1 PE=1 SV=2	0	100.301	19.348	23	27	23	1	1411	162.367	5.68	Not Found	Not Found	Not Found	Not Found	Not Found	High	High	High	1.021	218	288	294				1	1	1						218	288	294						9	23	23	0.76
FALSE	High	Master Protein	P78371	T-complex protein 1 subunit beta OS=Homo sapiens GN=CCT2 PE=1 SV=4	0	251.304	54.5794	22	157	22	1	535	57.452	6.46	Not Found	Not Found	Not Found	Not Found	Not Found	High	High	High	1.033	264.5	263.4	272.1				1	1	1						264.5	263.4	272.1						18	24	24	25.102
FALSE	High	Master Protein	P25705	ATP synthase subunit alpha, mitochondrial OS=Homo sapiens GN=ATP5A1 PE=1 SV=1	0	183.062	43.7613	22	123	22	1	553	59.714	9.13	Not Found	Not Found	Not Found	Not Found	Not Found	High	High	High	1.018	246.3	274.4	279.2				1	1	1						246.3	274.4	279.2						18	22	22	12.65
FALSE	High	Master Protein	P50990	T-complex protein 1 subunit theta OS=Homo sapiens GN=CCT8 PE=1 SV=4	0	205.543	43.2482	22	87	22	1	548	59.583	5.6	Not Found	Not Found	Not Found	Not Found	Not Found	High	High	High	0.952	302.2	255	242.8				1	1	1						302.2	255	242.8						20	23	23	11.519
FALSE	High	Master Protein	P17987	T-complex protein 1 subunit alpha OS=Homo sapiens GN=TCP1 PE=1 SV=1	0	184.347	50.7194	22	86	22	1	556	60.306	6.11	Not Found	Not Found	Not Found	Not Found	Not Found	High	High	High	0.971	300.6	253.3	246				1	1	1						300.6	253.3	246						17	22	22	14.647
FALSE	High	Master Protein	Q9Y4L1	Hypoxia up-regulated protein 1 OS=Homo sapiens GN=HYOU1 PE=1 SV=1	0	177.041	30.2302	22	68	22	1	999	111.266	5.22	Not Found	Not Found	Not Found	Not Found	Not Found	High	High	High	0.992	280.1	261	258.9				1	1	1						280.1	261	258.9						14	21	21	3.642
FALSE	High	Master Protein	Q08J23	tRNA (cytosine(34)-C(5))-methyltransferase OS=Homo sapiens GN=NSUN2 PE=1 SV=2	0	205.444	44.0678	22	62	22	1	767	86.416	6.77	Not Found	Not Found	Not Found	Not Found	Not Found	High	High	High	1.016	174.3	310.3	315.4				1	1	1						174.3	310.3	315.4						9	22	22	5.494
FALSE	High	Master Protein	P41252	Isoleucine--tRNA ligase, cytoplasmic OS=Homo sapiens GN=IARS PE=1 SV=2	0	179.627	21.1569	22	55	22	1	1262	144.406	6.15	Not Found	Not Found	Not Found	Not Found	Not Found	High	High	High	0.949	245.9	284.3	269.7				1	1	1						245.9	284.3	269.7						12	18	18	2.5
FALSE	High	Master Protein	P08133	Annexin A6 OS=Homo sapiens GN=ANXA6 PE=1 SV=3	0	154.062	36.2556	22	50	22	1	673	75.826	5.6	Not Found	Not Found	Not Found	Not Found	Not Found	High	High	High	0.96	229.9	290.9	279.2				1	1	1						229.9	290.9	279.2						11	22	22	4.012
FALSE	High	Master Protein	Q15393	Splicing factor 3B subunit 3 OS=Homo sapiens GN=SF3B3 PE=1 SV=4	0	131.577	21.1997	22	50	22	1	1217	135.492	5.26	Not Found	Not Found	Not Found	Not Found	Not Found	High	High	High	0.995	329.2	235.9	234.8				1	1	1						329.2	235.9	234.8						15	22	22	2.107
FALSE	High	Master Protein	O60841	Eukaryotic translation initiation factor 5B OS=Homo sapiens GN=EIF5B PE=1 SV=4	0	166.635	21.9672	23	46	22	1	1220	138.742	5.49	Not Found	Not Found	Not Found	Not Found	Not Found	High	High	High	1.021	278	258.3	263.7				1	1	1						278	258.3	263.7						15	24	24	3.417
FALSE	High	Master Protein	P55265	Double-stranded RNA-specific adenosine deaminase OS=Homo sapiens GN=ADAR PE=1 SV=4	0	158.131	22.3491	22	39	22	1	1226	135.981	8.65	Not Found	Not Found	Not Found	Not Found	Not Found	High	High	High	0.954	272.3	270.1	257.6				1	1	1						272.3	270.1	257.6						13	20	20	1.81
FALSE	High	Master Protein	O00429	Dynamin-1-like protein OS=Homo sapiens GN=DNM1L PE=1 SV=2	0	130.831	39.8098	22	39	22	1	736	81.826	6.81	Not Found	Not Found	Not Found	Not Found	Not Found	High	High	High	1.006	288.5	254.9	256.6				1	1	1						288.5	254.9	256.6						12	20	20	3.125
FALSE	High	Master Protein	P53618	Coatomer subunit beta OS=Homo sapiens GN=COPB1 PE=1 SV=3	0	143.492	29.6957	22	38	22	1	953	107.074	6.05	High	Not Found	Not Found	Not Found	Not Found	High	High	High	0.97	321	80.2	77.8	92.76			2	1	1	531.6					110.5	80.2	77.8	1					12	20	20	2.643
FALSE	High	Master Protein	Q14643	Inositol 1,4,5-trisphosphate receptor type 1 OS=Homo sapiens GN=ITPR1 PE=1 SV=3	0	102.694	11.3125	29	36	22	1	2758	313.729	6.04	Not Found	Not Found	Not Found	Not Found	Not Found	High	High	High	0.955	262.5	275	262.5				1	1	1						262.5	275	262.5						11	27	27	0.581
FALSE	High	Master Protein	Q8WWI1	LIM domain only protein 7 OS=Homo sapiens GN=LMO7 PE=1 SV=3	0	123.615	18.6572	22	33	22	1	1683	192.576	8.09	High	Not Found	Not Found	Not Found	Not Found	High	High	High	1.137	338.2	57.9	65.8	124.44			2	1	1	635.8					40.6	57.9	65.8	1					8	21	21	0.769
FALSE	High	Master Protein	O15067	Phosphoribosylformylglycinamidine synthase OS=Homo sapiens GN=PFAS PE=1 SV=4	0	121.102	23.3931	22	32	22	1	1338	144.643	5.76	Not Found	Not Found	Not Found	Not Found	Not Found	High	High	High	0.928	308.7	254.8	236.5				1	1	1						308.7	254.8	236.5						9	17	17	1.462
FALSE	High	Master Protein	Q14690	Protein RRP5 homolog OS=Homo sapiens GN=PDCD11 PE=1 SV=3	0	92.6226	14.0032	22	30	22	1	1871	208.57	8.87	Not Found	Not Found	Not Found	Not Found	Not Found	High	High	High	1.045	248.3	269.8	281.9				1	1	1						248.3	269.8	281.9						10	20	20	0.701
FALSE	High	Master Protein	Q14676	Mediator of DNA damage checkpoint protein 1 OS=Homo sapiens GN=MDC1 PE=1 SV=3	0	114.19	17.6161	22	27	22	1	2089	226.529	5.47	Not Found	Not Found	Not Found	Not Found	Not Found	High	High	High	1.011	144.5	326	329.5				1	1	1						144.5	326	329.5						3	13	13	0.799
FALSE	High	Master Protein	Q5VYK3	Proteasome-associated protein ECM29 homolog OS=Homo sapiens GN=ECM29 PE=1 SV=2	0	91.9958	14.7425	22	23	22	1	1845	204.16	7.12	Not Found	Not Found	Not Found	Not Found	Not Found	High	High	High	0.939	230.1	293.9	276				1	1	1						230.1	293.9	276						7	16	16	0.611
FALSE	High	Master Protein	Q99832	T-complex protein 1 subunit eta OS=Homo sapiens GN=CCT7 PE=1 SV=2	0	211.91	52.6703	21	89	21	1	543	59.329	7.65	Not Found	High	High	Not Found	Not Found	High	High	High	0.919	254.7	18.7	17.2	80.2			3	1	1		347.9	395.7			20.4	18.7	17.2		1	1			14	20	20	13.678
FALSE	High	Master Protein	Q7KZF4	Staphylococcal nuclease domain-containing protein 1 OS=Homo sapiens GN=SND1 PE=1 SV=1	0	139.363	26.5934	21	65	21	1	910	101.934	7.17	Not Found	High	Not Found	Not Found	Not Found	High	High	High	0.958	380.1	20.3	19.5	135.73			2	1	1		744.9				15.3	20.3	19.5		1				12	17	17	3.137
FALSE	High	Master Protein	O14980	Exportin-1 OS=Homo sapiens GN=XPO1 PE=1 SV=1	0	132.242	24.5565	21	59	21	1	1071	123.306	6.06	Not Found	Not Found	Not Found	Not Found	Not Found	High	High	High	0.958	246.8	282.6	270.6				1	1	1						246.8	282.6	270.6						11	20	20	2.919
FALSE	High	Master Protein	Q92945	Far upstream element-binding protein 2 OS=Homo sapiens GN=KHSRP PE=1 SV=4	0	172.787	37.4121	23	56	21	1	711	73.07	7.3	High	Not Found	Not Found	High	Not Found	High	High	High	0.939	254.1	19.4	18.3	121.98			3	1	1	134.1			606.1		22.1	19.4	18.3	1			1		17	23	23	7.483
FALSE	High	Master Protein	Q92598	Heat shock protein 105 kDa OS=Homo sapiens GN=HSPH1 PE=1 SV=1	0	173.384	40.2098	24	54	21	1	858	96.804	5.39	Not Found	Not Found	Not Found	Not Found	Not Found	High	High	High	1.05	261.6	262.6	275.8				1	1	1						261.6	262.6	275.8						13	21	21	3.971
FALSE	High	Master Protein	Q32MZ4	Leucine-rich repeat flightless-interacting protein 1 OS=Homo sapiens GN=LRRFIP1 PE=1 SV=2	0	186.293	41.7079	22	50	21	1	808	89.199	4.65	Not Found	Not Found	Not Found	Not Found	Not Found	High	High	High	1.015	271.3	262.4	266.4				1	1	1						271.3	262.4	266.4						12	20	20	5.127
FALSE	High	Master Protein	Q8WUM4	Programmed cell death 6-interacting protein OS=Homo sapiens GN=PDCD6IP PE=1 SV=1	0	128.161	30.4147	21	45	21	1	868	95.963	6.52	High	Not Found	Not Found	Not Found	Not Found	High	High	High	1.03	327.3	71.6	73.7	107.24			2	1	1	575.6					79.1	71.6	73.7	1					12	19	19	2.818
FALSE	High	Master Protein	O75533	Splicing factor 3B subunit 1 OS=Homo sapiens GN=SF3B1 PE=1 SV=3	0	143.215	20.6288	21	40	21	1	1304	145.738	7.09	Not Found	Not Found	Not Found	Not Found	Not Found	High	High	High	0.99	247.8	277.6	274.7				1	1	1						247.8	277.6	274.7						12	21	21	2.063
FALSE	High	Master Protein	P32004	Neural cell adhesion molecule L1 OS=Homo sapiens GN=L1CAM PE=1 SV=2	0	141.919	21.7979	21	39	21	1	1257	139.915	6.24	Not Found	Not Found	Not Found	Not Found	Not Found	High	High	High	0.967	250.8	279.3	270				1	1	1						250.8	279.3	270						9	19	19	1.59
FALSE	High	Master Protein	B5ME19	Eukaryotic translation initiation factor 3 subunit C-like protein OS=Homo sapiens GN=EIF3CL PE=3 SV=1	0	115.552	23.9606	21	38	21	1	914	105.407	5.64	Not Found	Not Found	Not Found	Not Found	Not Found	High	High	High	0.967	245.8	281.7	272.5				1	1	1						245.8	281.7	272.5						11	21	21	3.217
FALSE	High	Master Protein	Q99460	26S proteasome non-ATPase regulatory subunit 1 OS=Homo sapiens GN=PSMD1 PE=1 SV=2	0	107.214	24.8688	21	36	21	1	953	105.769	5.39	Not Found	Not Found	Not Found	Not Found	Not Found	High	High	High	0.99	294.8	253.8	251.4				1	1	1						294.8	253.8	251.4						12	17	17	2.818
FALSE	High	Master Protein	Q9Y263	Phospholipase A-2-activating protein OS=Homo sapiens GN=PLAA PE=1 SV=2	0	113.372	32.327	21	33	21	1	795	87.101	6.37	Not Found	Not Found	Not Found	Not Found	Not Found	High	High	High	0.959	296.7	256.9	246.4				1	1	1						296.7	256.9	246.4						15	19	19	2.875
FALSE	High	Master Protein	Q9H2G2	STE20-like serine/threonine-protein kinase OS=Homo sapiens GN=SLK PE=1 SV=1	0	123.725	20.8907	21	32	21	1	1235	142.607	5.15	Not Found	Not Found	Not Found	Not Found	Not Found	High	High	High	1.041	228.3	280.1	291.6				1	1	1						228.3	280.1	291.6						11	18	18	1.496
FALSE	High	Master Protein	Q9UPQ0	LIM and calponin homology domains-containing protein 1 OS=Homo sapiens GN=LIMCH1 PE=1 SV=4	0	107.689	23.1764	21	31	21	1	1083	121.792	6.47	Not Found	Not Found	Not Found	Not Found	Not Found	High	High	High	1.081	302.9	238.9	258.3				1	1	1						302.9	238.9	258.3						13	21	21	1.721
FALSE	High	Master Protein	O95163	Elongator complex protein 1 OS=Homo sapiens GN=IKBKAP PE=1 SV=3	0	123.651	21.5465	21	28	21	1	1332	150.159	5.94	Not Found	Not Found	Not Found	Not Found	Not Found	High	High	High	0.946	254.4	280.4	265.2				1	1	1						254.4	280.4	265.2						7	18	18	1.431
FALSE	High	Master Protein	Q9Y520	Protein PRRC2C OS=Homo sapiens GN=PRRC2C PE=1 SV=4	0	90.2288	9.7721	22	27	21	1	2896	316.718	9.13	Not Found	Not Found	Not Found	Not Found	Not Found	High	High	High	0.981	223.3	291.1	285.7				1	1	1						223.3	291.1	285.7						9	20	20	0.602
FALSE	High	Master Protein	P50851	Lipopolysaccharide-responsive and beige-like anchor protein OS=Homo sapiens GN=LRBA PE=1 SV=4	0	99.2416	10.723	21	26	21	1	2863	318.906	5.6	Not Found	Not Found	Not Found	Not Found	Not Found	High	High	High	0.922	261	280.5	258.5				1	1	1						261	280.5	258.5						9	17	17	0.409
FALSE	High	Master Protein	P46939	Utrophin OS=Homo sapiens GN=UTRN PE=1 SV=2	0	85.8915	8.15613	21	26	21	1	3433	394.22	5.33	Not Found	Not Found	Not Found	Not Found	Not Found	High	High	High	0.988	167.7	318	314.3				1	1	1						167.7	318	314.3						4	16	16	0.295
FALSE	High	Master Protein	Q14008	Cytoskeleton-associated protein 5 OS=Homo sapiens GN=CKAP5 PE=1 SV=3	0	87.5107	12.0079	21	26	21	1	2032	225.352	7.8	Not Found	Not Found	Not Found	Not Found	Not Found	High	High	High	0.993	200.8	300.6	298.6				1	1	1						200.8	300.6	298.6						7	18	18	0.573
FALSE	High	Master Protein	P08195	4F2 cell-surface antigen heavy chain OS=Homo sapiens GN=SLC3A2 PE=1 SV=3	0	255.094	40.3175	20	191	20	1	630	67.952	5.01	Not Found	Not Found	Not Found	Not Found	Not Found	High	High	High	1.075	230.3	274.5	295.1				1	1	1						230.3	274.5	295.1						12	21	21	29.539
FALSE	High	Master Protein	O43175	D-3-phosphoglycerate dehydrogenase OS=Homo sapiens GN=PHGDH PE=1 SV=4	0	243.739	46.5291	20	170	20	1	533	56.614	6.71	High	Not Found	Not Found	Not Found	Not Found	High	High	High	0.989	269.6	131.1	129.7	79.08			2	1	1	420.3					118.9	131.1	129.7	1					17	20	20	48.239
FALSE	High	Master Protein	P26038	Moesin OS=Homo sapiens GN=MSN PE=1 SV=3	0	181.555	42.2877	27	118	20	1	577	67.778	6.4	Not Found	Not Found	Not Found	High	Not Found	High	High	High	0.996	367.3	32.8	32.7	126.92			2	1	1				696.9		37.7	32.8	32.7				1		23	31	31	14.672
FALSE	High	Master Protein	P13667	Protein disulfide-isomerase A4 OS=Homo sapiens GN=PDIA4 PE=1 SV=2	0	199.285	33.9535	20	88	20	1	645	72.887	5.07	Not Found	Not Found	Not Found	Not Found	High	High	High	High	0.978	380.5	19.7	19.3	133.04			2	1	1					738.5	22.5	19.7	19.3					1	18	24	24	8.047
FALSE	High	Master Protein	Q08211	ATP-dependent RNA helicase A OS=Homo sapiens GN=DHX9 PE=1 SV=4	0	190.966	19.685	20	81	20	1	1270	140.869	6.84	Not Found	Not Found	High	Not Found	Not Found	High	High	High	0.989	368.9	31.2	30.9	131.23			2	1	1			711.3			26.6	31.2	30.9			1			14	20	20	2.07
FALSE	High	Master Protein	P49915	GMP synthase [glutamine-hydrolyzing] OS=Homo sapiens GN=GMPS PE=1 SV=1	0	135.102	39.3939	20	53	20	1	693	76.667	6.87	Not Found	Not Found	Not Found	Not Found	Not Found	High	High	High	1.016	261.3	267.2	271.5				1	1	1						261.3	267.2	271.5						10	16	16	4.142
FALSE	High	Master Protein	P56192	Methionine--tRNA ligase, cytoplasmic OS=Homo sapiens GN=MARS PE=1 SV=2	0	170.222	29.2222	20	52	20	1	900	101.052	6.16	Not Found	Not Found	Not Found	Not Found	Not Found	High	High	High	0.982	256.4	274.3	269.3				1	1	1						256.4	274.3	269.3						12	18	18	7.185
FALSE	High	Master Protein	P55786	Puromycin-sensitive aminopeptidase OS=Homo sapiens GN=NPEPPS PE=1 SV=2	0	115.907	25.0272	20	47	20	1	919	103.211	5.72	Not Found	Not Found	Not Found	Not Found	Not Found	High	High	High	0.968	281.8	263.3	254.9				1	1	1						281.8	263.3	254.9						12	18	18	2.643
FALSE	High	Master Protein	Q92499	ATP-dependent RNA helicase DDX1 OS=Homo sapiens GN=DDX1 PE=1 SV=2	0	127.835	31.4865	20	46	20	1	740	82.38	7.23	Not Found	Not Found	Not Found	Not Found	Not Found	High	High	High	0.928	295.5	261.6	242.9				1	1	1						295.5	261.6	242.9						11	19	19	4.555
FALSE	High	Master Protein	Q96QK1	Vacuolar protein sorting-associated protein 35 OS=Homo sapiens GN=VPS35 PE=1 SV=2	0	123.372	31.7839	20	45	20	1	796	91.649	5.49	Not Found	Not Found	Not Found	Not Found	Not Found	High	High	High	1.057	206.1	288.7	305.2				1	1	1						206.1	288.7	305.2						7	15	15	2.981
FALSE	High	Master Protein	Q13263	Transcription intermediary factor 1-beta OS=Homo sapiens GN=TRIM28 PE=1 SV=5	0	177.129	39.521	20	43	20	1	835	88.493	5.77	Not Found	Not Found	Not Found	Not Found	Not Found	High	High	High	0.957	284.6	263.4	252				1	1	1						284.6	263.4	252						10	16	16	5.749
FALSE	High	Master Protein	Q9NR30	Nucleolar RNA helicase 2 OS=Homo sapiens GN=DDX21 PE=1 SV=5	0	135.977	33.461	22	42	20	1	783	87.29	9.28	Not Found	Not Found	Not Found	Not Found	Not Found	High	High	High	0.951	248.2	282.9	269				1	1	1						248.2	282.9	269						9	22	22	4.926
FALSE	High	Master Protein	P25205	DNA replication licensing factor MCM3 OS=Homo sapiens GN=MCM3 PE=1 SV=3	0	147.182	28.0941	20	41	20	1	808	90.924	5.77	Not Found	Not Found	Not Found	Not Found	Not Found	High	High	High	0.934	299.9	258.6	241.6				1	1	1						299.9	258.6	241.6						15	19	19	2.498
FALSE	High	Master Protein	P46060	Ran GTPase-activating protein 1 OS=Homo sapiens GN=RANGAP1 PE=1 SV=1	0	136.097	41.2266	20	41	20	1	587	63.502	4.68	Not Found	Not Found	Not Found	Not Found	Not Found	High	High	High	0.999	250.2	275	274.8				1	1	1						250.2	275	274.8						10	18	18	7.733
FALSE	High	Master Protein	P49736	DNA replication licensing factor MCM2 OS=Homo sapiens GN=MCM2 PE=1 SV=4	0	127.385	27.9867	20	39	20	1	904	101.832	5.52	High	Not Found	Not Found	Not Found	Not Found	High	High	High	0.972	252.8	277.5	269.6				1	1	1						252.8	277.5	269.6						11	20	20	2.946
FALSE	High	Master Protein	Q9BXP5	Serrate RNA effector molecule homolog OS=Homo sapiens GN=SRRT PE=1 SV=1	0	111.245	25.9132	20	37	20	1	876	100.604	5.96	Not Found	Not Found	Not Found	Not Found	Not Found	High	High	High	0.96	265.9	272.5	261.7				1	1	1						265.9	272.5	261.7						11	17	17	2.981
FALSE	High	Master Protein	Q16513	Serine/threonine-protein kinase N2 OS=Homo sapiens GN=PKN2 PE=1 SV=1	0	128.76	26.9309	20	36	20	1	984	111.964	6.3	Not Found	Not Found	Not Found	Not Found	Not Found	High	High	High	0.914	238.9	293.1	268				1	1	1						238.9	293.1	268						10	19	19	2.105
FALSE	High	Master Protein	P06737	Glycogen phosphorylase, liver form OS=Homo sapiens GN=PYGL PE=1 SV=4	0	89.261	29.634	21	36	20	1	847	97.087	7.17	Not Found	Not Found	Not Found	Not Found	Not Found	High	High	High	0.955	278.5	266.7	254.8				1	1	1						278.5	266.7	254.8						9	18	18	2.039
FALSE	High	Master Protein	Q9P2J5	Leucine--tRNA ligase, cytoplasmic OS=Homo sapiens GN=LARS PE=1 SV=2	0	116.191	20.5782	20	34	20	1	1176	134.379	7.3	High	Not Found	Not Found	Not Found	Not Found	High	High	High	0.978	321.2	79.7	78	106.98			2	1	1	564.1					78.2	79.7	78	1					11	18	18	1.642
FALSE	High	Master Protein	O94906	Pre-mRNA-processing factor 6 OS=Homo sapiens GN=PRPF6 PE=1 SV=1	0	101.29	24.3358	20	33	20	1	941	106.858	8.25	Not Found	Not Found	Not Found	Not Found	Not Found	High	High	High	1.007	233.4	282.3	284.4				1	1	1						233.4	282.3	284.4						9	20	20	1.512
FALSE	High	Master Protein	P54886	Delta-1-pyrroline-5-carboxylate synthase OS=Homo sapiens GN=ALDH18A1 PE=1 SV=2	0	117.762	28.3019	20	32	20	1	795	87.248	7.12	Not Found	Not Found	Not Found	Not Found	Not Found	High	High	High	0.974	254.8	276.2	269				1	1	1						254.8	276.2	269						9	19	19	2.802
FALSE	High	Master Protein	Q9NYU2	UDP-glucose:glycoprotein glucosyltransferase 1 OS=Homo sapiens GN=UGGT1 PE=1 SV=3	0	98.5755	16.2701	20	31	20	1	1555	177.078	5.63	Not Found	Not Found	Not Found	Not Found	Not Found	High	High	High	0.912	241.2	292.3	266.5				1	1	1						241.2	292.3	266.5						8	16	16	1.174
FALSE	High	Master Protein	P78347	General transcription factor II-I OS=Homo sapiens GN=GTF2I PE=1 SV=2	0	111.958	26.0521	20	31	20	1	998	112.346	6.39	Not Found	Not Found	Not Found	Not Found	Not Found	High	High	High	0.931	241.2	289.3	269.5				1	1	1						241.2	289.3	269.5						7	16	16	1.936
FALSE	High	Master Protein	P28340	DNA polymerase delta catalytic subunit OS=Homo sapiens GN=POLD1 PE=1 SV=2	0	87.4103	24.8419	21	30	20	1	1107	123.553	7.03	High	Not Found	Not Found	Not Found	Not Found	High	High	High	0.979	342.6	58	56.7	109.82			2	1	1	608.7					76.6	58	56.7	1					9	15	15	1.154
FALSE	High	Master Protein	O75116	Rho-associated protein kinase 2 OS=Homo sapiens GN=ROCK2 PE=1 SV=4	0	88.9302	17.4352	23	28	20	1	1388	160.799	6.02	Not Found	Not Found	Not Found	Not Found	Not Found	High	High	High	1.007	248.7	274.7	276.6				1	1	1						248.7	274.7	276.6						10	22	22	0.944
FALSE	High	Master Protein	Q9H583	HEAT repeat-containing protein 1 OS=Homo sapiens GN=HEATR1 PE=1 SV=3	0	77.1875	11.5672	20	26	20	1	2144	242.215	6.54	Not Found	Not Found	Not Found	Not Found	Not Found	High	High	High	1.033	211.1	289.6	299.3				1	1	1						211.1	289.6	299.3						6	13	13	0.494
FALSE	High	Master Protein	Q12888	Tumor suppressor p53-binding protein 1 OS=Homo sapiens GN=TP53BP1 PE=1 SV=2	0	104.766	16.8357	20	24	20	1	1972	213.443	4.7	Not Found	Not Found	Not Found	Not Found	Not Found	High	High	High	1.004	144.1	327.3	328.6				1	1	1						144.1	327.3	328.6						3	16	16	0.648
FALSE	High	Master Protein	Q92538	Golgi-specific brefeldin A-resistance guanine nucleotide exchange factor 1 OS=Homo sapiens GN=GBF1 PE=1 SV=2	0	94.4734	13.986	20	23	20	1	1859	206.315	5.73	Not Found	Not Found	Not Found	Not Found	Not Found	High	High	High	1	252.5	273.7	273.8				1	1	1						252.5	273.7	273.8						6	16	16	0.618
FALSE	High	Master Protein	P00558	Phosphoglycerate kinase 1 OS=Homo sapiens GN=PGK1 PE=1 SV=3	0	329.838	70.9832	23	284	19	1	417	44.586	8.1	Not Found	Not Found	High	Not Found	Not Found	High	High	High	1.144	301.8	91.6	104.8	104.27			2	1	1			524.4			79.3	91.6	104.8			1			24	26	26	106.978
FALSE	High	Master Protein	P11021	78 kDa glucose-regulated protein OS=Homo sapiens GN=HSPA5 PE=1 SV=2	0	232.917	34.4037	21	202	19	1	654	72.288	5.16	Not Found	High	Not Found	Not Found	Not Found	High	High	High	1.005	324.6	75.3	75.6	109.56			2	1	1		576				73.1	75.3	75.6		1				23	23	23	17.548
FALSE	High	Master Protein	Q16658	Fascin OS=Homo sapiens GN=FSCN1 PE=1 SV=3	0	182.577	45.2333	19	142	19	1	493	54.496	7.24	High	Not Found	Not Found	Not Found	Not Found	High	High	High	0.92	284.1	120.7	111.1	84.26			2	1	1	453.3					114.8	120.7	111.1	1					10	17	17	15.103
FALSE	High	Master Protein	P13797	Plastin-3 OS=Homo sapiens GN=PLS3 PE=1 SV=4	0	177.359	33.9683	21	85	19	1	630	70.766	5.6	Not Found	Not Found	Not Found	Not Found	Not Found	High	High	High	1.054	258.1	263.8	278.1				1	1	1						258.1	263.8	278.1						20	24	24	12.154
FALSE	High	Master Protein	O00571	ATP-dependent RNA helicase DDX3X OS=Homo sapiens GN=DDX3X PE=1 SV=3	0	140.977	32.9305	20	61	19	1	662	73.198	7.18	Not Found	High	Not Found	Not Found	Not Found	High	High	High	0.962	310.3	249.5	240.2				1	1	1						310.3	249.5	240.2						16	18	18	6.197
FALSE	High	Master Protein	Q14974	Importin subunit beta-1 OS=Homo sapiens GN=KPNB1 PE=1 SV=2	0	161.641	28.8813	19	54	19	1	876	97.108	4.78	Not Found	Not Found	Not Found	Not Found	Not Found	High	High	High	0.888	319.2	254.7	226.1				1	1	1						319.2	254.7	226.1						13	15	15	5.579
FALSE	High	Master Protein	P20810	Calpastatin OS=Homo sapiens GN=CAST PE=1 SV=4	0	122.575	36.0169	19	50	19	1	708	76.526	5.07	Not Found	Not Found	Not Found	Not Found	Not Found	High	High	High	1.074	229.2	275.2	295.6				1	1	1						229.2	275.2	295.6						9	16	16	4.309
FALSE	High	Master Protein	P43243	Matrin-3 OS=Homo sapiens GN=MATR3 PE=1 SV=2	0	138.447	24.6753	19	44	19	1	847	94.565	6.25	Not Found	Not Found	Not Found	Not Found	Not Found	High	High	High	0.965	291.2	259	249.8				1	1	1						291.2	259	249.8						13	19	19	3.498
FALSE	High	Master Protein	O60610	Protein diaphanous homolog 1 OS=Homo sapiens GN=DIAPH1 PE=1 SV=2	0	138.153	19.9686	19	41	19	1	1272	141.258	5.41	Not Found	Not Found	Not Found	Not Found	Not Found	High	High	High	0.964	192.3	309.5	298.2				1	1	1						192.3	309.5	298.2						5	16	16	1.823
FALSE	High	Master Protein	O95782	AP-2 complex subunit alpha-1 OS=Homo sapiens GN=AP2A1 PE=1 SV=3	0	127.008	27.5333	24	35	19	1	977	107.478	7.03	Not Found	Not Found	Not Found	Not Found	Not Found	High	High	High	0.969	238.9	284.9	276.2				1	1	1						238.9	284.9	276.2						10	23	23	2.346
FALSE	High	Master Protein	P78344	Eukaryotic translation initiation factor 4 gamma 2 OS=Homo sapiens GN=EIF4G2 PE=1 SV=1	0	112.931	26.1301	19	34	19	1	907	102.297	7.14	Not Found	Not Found	Not Found	Not Found	Not Found	High	High	High	0.984	167.5	318.7	313.7				1	1	1						167.5	318.7	313.7						5	13	13	2.039
FALSE	High	Master Protein	O43592	Exportin-T OS=Homo sapiens GN=XPOT PE=1 SV=2	0	118.42	25.5717	19	33	19	1	962	109.893	5.39	Not Found	Not Found	Not Found	Not Found	Not Found	High	High	High	0.943	245.2	285.5	269.2				1	1	1						245.2	285.5	269.2						7	14	14	2.574
FALSE	High	Master Protein	Q9UHD8	Septin-9 OS=Homo sapiens GN=SEPT9 PE=1 SV=2	0	100.07	32.2526	19	33	19	1	586	65.361	8.97	Not Found	Not Found	Not Found	Not Found	Not Found	High	High	High	0.985	222.2	291.1	286.7				1	1	1						222.2	291.1	286.7						10	18	18	3.467
FALSE	High	Master Protein	Q7L014	Probable ATP-dependent RNA helicase DDX46 OS=Homo sapiens GN=DDX46 PE=1 SV=2	0	100.129	19.9806	19	32	19	1	1031	117.29	9.29	High	Not Found	Not Found	Not Found	Not Found	High	High	High	1.009	337.9	61.8	62.4	115.33			2	1	1	613.4					62.3	61.8	62.4	1					10	17	17	1.771
FALSE	High	Master Protein	P00533	Epidermal growth factor receptor OS=Homo sapiens GN=EGFR PE=1 SV=2	0	126.194	18.595	19	32	19	1	1210	134.19	6.68	Not Found	Not Found	Not Found	Not Found	Not Found	High	High	High	1.076	267.4	256.6	276				1	1	1						267.4	256.6	276						14	18	18	1.561
FALSE	High	Master Protein	P52948	Nuclear pore complex protein Nup98-Nup96 OS=Homo sapiens GN=NUP98 PE=1 SV=4	0	107.232	13.7589	19	31	19	1	1817	197.457	6.4	Not Found	Not Found	Not Found	Not Found	Not Found	High	High	High	0.982	201.5	301.9	296.6				1	1	1						201.5	301.9	296.6						6	17	17	1.035
FALSE	High	Master Protein	O60264	SWI/SNF-related matrix-associated actin-dependent regulator of chromatin subfamily A member 5 OS=Homo sapiens GN=SMARCA5 PE=1 SV=1	0	75.3719	20.5323	19	28	19	1	1052	121.828	8.09	Not Found	Not Found	Not Found	Not Found	Not Found	High	High	High	0.957	247.2	282.5	270.3				1	1	1						247.2	282.5	270.3						9	15	15	1.179
FALSE	High	Master Protein	Q7Z2W4	Zinc finger CCCH-type antiviral protein 1 OS=Homo sapiens GN=ZC3HAV1 PE=1 SV=3	0	114.443	28.2705	19	26	19	1	902	101.367	8.4	Not Found	Not Found	Not Found	Not Found	Not Found	High	High	High	0.949	268	272.9	259				1	1	1						268	272.9	259						8	18	18	1.259
FALSE	High	Master Protein	Q8WYP5	Protein ELYS OS=Homo sapiens GN=AHCTF1 PE=1 SV=3	0	92.7726	11.0768	19	25	19	1	2266	252.342	6.6	Not Found	Not Found	Not Found	Not Found	Not Found	High	High	High	1.068	189.7	295	315.2				1	1	1						189.7	295	315.2						5	17	17	0.531
FALSE	High	Master Protein	P06744	Glucose-6-phosphate isomerase OS=Homo sapiens GN=GPI PE=1 SV=4	0	132.677	36.0215	18	71	18	1	558	63.107	8.32	Not Found	Not Found	Not Found	Not Found	Not Found	High	High	High	0.883	296	267.7	236.3				1	1	1						296	267.7	236.3						12	16	16	9.661
FALSE	High	Master Protein	P40227	T-complex protein 1 subunit zeta OS=Homo sapiens GN=CCT6A PE=1 SV=3	0	132.059	40.8663	18	63	18	1	531	57.988	6.68	Not Found	Not Found	Not Found	Not Found	Not Found	High	High	High	1.004	234.3	282.3	283.4				1	1	1						234.3	282.3	283.4						10	18	18	8.284
FALSE	High	Master Protein	Q14697	Neutral alpha-glucosidase AB OS=Homo sapiens GN=GANAB PE=1 SV=3	0	130.246	25.4237	18	61	18	1	944	106.807	6.14	Not Found	Not Found	Not Found	Not Found	Not Found	High	High	High	0.958	244	284	272.1				1	1	1						244	284	272.1						11	16	16	2.818
FALSE	High	Master Protein	P20700	Lamin-B1 OS=Homo sapiens GN=LMNB1 PE=1 SV=2	0	153.481	43.5154	21	58	18	1	586	66.368	5.16	Not Found	Not Found	Not Found	Not Found	Not Found	High	High	High	0.964	298.1	255.6	246.4				1	1	1						298.1	255.6	246.4						14	19	19	6.897
FALSE	High	Master Protein	P13010	X-ray repair cross-complementing protein 5 OS=Homo sapiens GN=XRCC5 PE=1 SV=3	0	112.194	33.4699	18	56	18	1	732	82.652	5.81	Not Found	Not Found	Not Found	Not Found	Not Found	High	High	High	0.972	181.4	313.8	304.8				1	1	1						181.4	313.8	304.8						9	14	14	3.19
FALSE	High	Master Protein	P13489	Ribonuclease inhibitor OS=Homo sapiens GN=RNH1 PE=1 SV=2	0	156.448	53.7961	18	52	18	1	461	49.941	4.82	Not Found	Not Found	Not Found	Not Found	Not Found	High	High	High	0.919	268.4	277	254.6				1	1	1						268.4	277	254.6						10	16	16	9.798
FALSE	High	Master Protein	P36776	Lon protease homolog, mitochondrial OS=Homo sapiens GN=LONP1 PE=1 SV=2	0	154	25.2346	18	44	18	1	959	106.422	6.39	Not Found	Not Found	Not Found	Not Found	Not Found	High	High	High	1.032	238.7	276.2	285.1				1	1	1						238.7	276.2	285.1						9	16	16	2.981
FALSE	High	Master Protein	Q03252	Lamin-B2 OS=Homo sapiens GN=LMNB2 PE=1 SV=4	0	110.065	32.2581	21	42	18	1	620	69.906	5.59	Not Found	Not Found	Not Found	Not Found	Not Found	High	High	High	0.965	286.1	261.6	252.3				1	1	1						286.1	261.6	252.3						15	19	19	3.903
FALSE	High	Master Protein	Q15029	116 kDa U5 small nuclear ribonucleoprotein component OS=Homo sapiens GN=EFTUD2 PE=1 SV=1	0	125.103	26.2346	19	42	18	1	972	109.366	5	Not Found	Not Found	Not Found	Not Found	Not Found	High	High	High	0.977	271.3	267.4	261.3				1	1	1						271.3	267.4	261.3						8	16	16	2.101
FALSE	High	Master Protein	Q16531	DNA damage-binding protein 1 OS=Homo sapiens GN=DDB1 PE=1 SV=1	0	109.647	18.1579	18	39	18	1	1140	126.887	5.26	Not Found	Not Found	Not Found	Not Found	Not Found	High	High	High	0.945	298.7	257.8	243.5				1	1	1						298.7	257.8	243.5						13	18	18	2.223
FALSE	High	Master Protein	P54577	Tyrosine--tRNA ligase, cytoplasmic OS=Homo sapiens GN=YARS PE=1 SV=4	0	97.5375	36.3636	18	39	18	1	528	59.106	7.05	Not Found	Not Found	Not Found	Not Found	Not Found	High	High	High	0.955	248.9	282	269.2				1	1	1						248.9	282	269.2						13	17	17	3.108
FALSE	High	Master Protein	P05455	Lupus La protein OS=Homo sapiens GN=SSB PE=1 SV=2	0	92.6718	45.8333	18	39	18	1	408	46.808	7.12	Not Found	Not Found	Not Found	High	Not Found	High	High	High	1.02	384.3	15.5	15.9	136.47			2	1	1				755.2		13.4	15.5	15.9				1		10	18	18	6.279
FALSE	High	Master Protein	Q12965	Unconventional myosin-Ie OS=Homo sapiens GN=MYO1E PE=1 SV=2	0	104.86	19.4043	19	38	18	1	1108	126.982	8.92	Not Found	Not Found	Not Found	Not Found	Not Found	High	High	High	0.981	266	269.5	264.5				1	1	1						266	269.5	264.5						10	16	16	1.804
FALSE	High	Master Protein	Q9BSJ8	Extended synaptotagmin-1 OS=Homo sapiens GN=ESYT1 PE=1 SV=1	0	127.376	22.5543	18	36	18	1	1104	122.78	5.83	Not Found	Not Found	Not Found	Not Found	Not Found	High	High	High	0.889	289.4	270.3	240.3				1	1	1						289.4	270.3	240.3						9	13	13	1.807
FALSE	High	Master Protein	Q86UE4	Protein LYRIC OS=Homo sapiens GN=MTDH PE=1 SV=2	0	105.175	40.0344	18	36	18	1	582	63.799	9.32	Not Found	Not Found	Not Found	Not Found	Not Found	High	High	High	0.954	286.3	262.8	250.9				1	1	1						286.3	262.8	250.9						10	16	16	7.577
FALSE	High	Master Protein	P46459	Vesicle-fusing ATPase OS=Homo sapiens GN=NSF PE=1 SV=3	0	105.599	28.3602	19	35	18	1	744	82.542	6.95	Not Found	Not Found	High	Not Found	Not Found	High	High	High	0.956	380.9	19.6	18.7	136.01			2	1	1			747.1			14.6	19.6	18.7			1			9	20	20	2.594
FALSE	High	Master Protein	Q9UHB6	LIM domain and actin-binding protein 1 OS=Homo sapiens GN=LIMA1 PE=1 SV=1	0	116.731	30.6983	18	35	18	1	759	85.173	6.84	Not Found	Not Found	Not Found	Not Found	Not Found	High	High	High	1.129	247.7	259.4	292.9				1	1	1						247.7	259.4	292.9						12	18	18	1.859
FALSE	High	Master Protein	Q9UHB9	Signal recognition particle subunit SRP68 OS=Homo sapiens GN=SRP68 PE=1 SV=2	0	115.783	33.8118	18	33	18	1	627	70.686	8.56	Not Found	Not Found	Not Found	Not Found	Not Found	High	High	High	0.971	360.2	223.2	216.6				1	1	1						360.2	223.2	216.6						11	17	17	3.479
FALSE	High	Master Protein	O75694	Nuclear pore complex protein Nup155 OS=Homo sapiens GN=NUP155 PE=1 SV=1	0	114.343	15.816	18	30	18	1	1391	155.1	6.16	Not Found	Not Found	Not Found	Not Found	Not Found	High	High	High	0.915	335.6	242.6	221.8				1	1	1						335.6	242.6	221.8						10	17	17	1.392
FALSE	High	Master Protein	P46087	Probable 28S rRNA (cytosine(4447)-C(5))-methyltransferase OS=Homo sapiens GN=NOP2 PE=1 SV=2	0	97.9488	30.2956	18	30	18	1	812	89.247	9.23	Not Found	Not Found	Not Found	Not Found	Not Found	High	High	High	0.938	206.4	306.4	287.2				1	1	1						206.4	306.4	287.2						6	17	17	3.108
FALSE	High	Master Protein	Q6P2E9	Enhancer of mRNA-decapping protein 4 OS=Homo sapiens GN=EDC4 PE=1 SV=1	0	115.747	22.7695	18	29	18	1	1401	151.567	5.86	Not Found	Not Found	Not Found	Not Found	Not Found	High	High	High	0.952	244.2	284.8	271				1	1	1						244.2	284.8	271						6	12	12	1.231
FALSE	High	Master Protein	P33993	DNA replication licensing factor MCM7 OS=Homo sapiens GN=MCM7 PE=1 SV=4	0	92.0676	28.2337	18	29	18	1	719	81.257	6.46	Not Found	Not Found	Not Found	Not Found	Not Found	High	High	High	0.952	285.6	263.5	250.9				1	1	1						285.6	263.5	250.9						12	15	15	1.812
FALSE	High	Master Protein	Q9UKV3	Apoptotic chromatin condensation inducer in the nucleus OS=Homo sapiens GN=ACIN1 PE=1 SV=2	0	83.8281	17.1514	18	29	18	1	1341	151.771	6.43	Not Found	Not Found	Not Found	Not Found	Not Found	High	High	High	1.018	311.3	242.2	246.5				1	1	1						311.3	242.2	246.5						9	15	15	0.955
FALSE	High	Master Protein	P52732	Kinesin-like protein KIF11 OS=Homo sapiens GN=KIF11 PE=1 SV=2	0	95.1197	17.8977	18	29	18	1	1056	119.085	5.64	Not Found	Not Found	Not Found	Not Found	Not Found	High	High	High	1.085	283.5	247.7	268.8				1	1	1						283.5	247.7	268.8						10	17	17	1.222
FALSE	High	Master Protein	O60271	C-Jun-amino-terminal kinase-interacting protein 4 OS=Homo sapiens GN=SPAG9 PE=1 SV=4	0	105.624	18.8494	18	29	18	1	1321	146.115	5.15	Not Found	Not Found	Not Found	Not Found	Not Found	High	High	High	1.197	129	305.5	365.5				1	1	1						129	305.5	365.5						5	18	18	1.134
FALSE	High	Master Protein	P52701	DNA mismatch repair protein Msh6 OS=Homo sapiens GN=MSH6 PE=1 SV=2	0	83.7451	16.8382	18	27	18	1	1360	152.689	6.9	Not Found	Not Found	Not Found	Not Found	Not Found	High	High	High	0.963	188.7	311.4	299.9				1	1	1						188.7	311.4	299.9						5	15	15	0.939
FALSE	High	Master Protein	P35606	Coatomer subunit beta' OS=Homo sapiens GN=COPB2 PE=1 SV=2	0	103.976	27.9249	18	27	18	1	906	102.422	5.27	Not Found	Not Found	Not Found	Not Found	Not Found	High	High	High	0.975	258.1	274.3	267.6				1	1	1						258.1	274.3	267.6						8	16	16	1.683
FALSE	High	Master Protein	O75153	Clustered mitochondria protein homolog OS=Homo sapiens GN=CLUH PE=1 SV=2	0	84.4668	17.1123	18	25	18	1	1309	146.577	6.13	Not Found	Not Found	Not Found	Not Found	Not Found	High	High	High	0.93	268.5	275.3	256.2				1	1	1						268.5	275.3	256.2						8	14	14	0.972
FALSE	High	Master Protein	Q93009	Ubiquitin carboxyl-terminal hydrolase 7 OS=Homo sapiens GN=USP7 PE=1 SV=2	0	78.4049	19.3285	18	24	18	1	1102	128.22	5.55	Not Found	Not Found	High	Not Found	Not Found	High	High	High	1.006	385.9	14	14.1	135.06			2	1	1			754.5			17.4	14	14.1			1			6	17	17	1.036
FALSE	High	Master Protein	P35658	Nuclear pore complex protein Nup214 OS=Homo sapiens GN=NUP214 PE=1 SV=2	0	76.3081	10.1914	18	23	18	1	2090	213.488	7.47	Not Found	Not Found	Not Found	Not Found	Not Found	High	High	High	1.026	254.6	269.2	276.2				1	1	1						254.6	269.2	276.2						9	17	17	0.989
FALSE	High	Master Protein	Q5UIP0	Telomere-associated protein RIF1 OS=Homo sapiens GN=RIF1 PE=1 SV=2	0	102.166	12.055	18	22	18	1	2472	274.294	5.52	Not Found	Not Found	Not Found	Not Found	Not Found	High	High	High	0.996	225	288.1	286.9				1	1	1						225	288.1	286.9						6	15	15	0.429
FALSE	High	Master Protein	A5YKK6	CCR4-NOT transcription complex subunit 1 OS=Homo sapiens GN=CNOT1 PE=1 SV=2	0	73.1266	9.21717	18	21	18	1	2376	266.768	7.11	Not Found	Not Found	Not Found	Not Found	Not Found	High	High	High	0.955	265.8	273.3	261				1	1	1						265.8	273.3	261						6	14	14	0.406
FALSE	High	Master Protein	Q8IUD2	ELKS/Rab6-interacting/CAST family member 1 OS=Homo sapiens GN=ERC1 PE=1 SV=1	0	80.2921	18.7276	18	21	18	1	1116	128.008	5.97	Not Found	Not Found	Not Found	Not Found	Not Found	High	High	High	1.041	256.9	266	277.1				1	1	1						256.9	266	277.1						8	15	15	0.844
FALSE	High	Master Protein	P04406	Glyceraldehyde-3-phosphate dehydrogenase OS=Homo sapiens GN=GAPDH PE=1 SV=3	0	149.569	64.7761	17	176	17	1	335	36.03	8.46	Not Found	High	Not Found	Not Found	High	High	High	High	1.061	246.6	29.3	31	81.13			3	1	1		272.3			432.5	34.9	29.3	31		1			1	15	18	18	45.416
FALSE	High	Master Protein	P11142	Heat shock cognate 71 kDa protein OS=Homo sapiens GN=HSPA8 PE=1 SV=1	0	200.793	32.3529	22	133	17	1	646	70.854	5.52	Not Found	Not Found	Not Found	Not Found	Not Found	High	High	High	1.138	245.3	259.5	295.3				1	1	1						245.3	259.5	295.3						22	25	25	19.309
FALSE	High	Master Protein	Q8NC51	Plasminogen activator inhibitor 1 RNA-binding protein OS=Homo sapiens GN=SERBP1 PE=1 SV=2	0	161.292	44.3627	17	89	17	1	408	44.938	8.65	Not Found	Not Found	Not Found	Not Found	Not Found	High	High	High	1.029	276.1	258.2	265.7				1	1	1						276.1	258.2	265.7						13	19	19	33.807
FALSE	High	Master Protein	Q00839	Heterogeneous nuclear ribonucleoprotein U OS=Homo sapiens GN=HNRNPU PE=1 SV=6	0	128.385	23.7576	17	73	17	1	825	90.528	6	Not Found	Not Found	Not Found	Not Found	Not Found	High	High	High	0.978	259.9	273.1	267				1	1	1						259.9	273.1	267						16	19	19	3.885
FALSE	High	Master Protein	P36871	Phosphoglucomutase-1 OS=Homo sapiens GN=PGM1 PE=1 SV=3	0	125.093	34.3416	17	66	17	1	562	61.411	6.76	Not Found	High	Not Found	Not Found	Not Found	High	High	High	0.938	365.3	35.8	33.6	126.44			2	1	1		691.9				38.7	35.8	33.6		1				14	16	16	5.158
FALSE	High	Master Protein	P26639	Threonine--tRNA ligase, cytoplasmic OS=Homo sapiens GN=TARS PE=1 SV=3	0	133.499	26.6943	17	66	17	1	723	83.382	6.67	Not Found	Not Found	Not Found	Not Found	Not Found	High	High	High	1.064	272.9	255.4	271.6				1	1	1						272.9	255.4	271.6						11	18	18	3.642
FALSE	High	Master Protein	Q16851	UTP--glucose-1-phosphate uridylyltransferase OS=Homo sapiens GN=UGP2 PE=1 SV=5	0	108.571	40.3543	17	49	17	1	508	56.905	8.15	Not Found	Not Found	Not Found	Not Found	Not Found	High	High	High	0.915	293.1	264.7	242.2				1	1	1						293.1	264.7	242.2						13	15	15	5.494
FALSE	High	Master Protein	P35998	26S protease regulatory subunit 7 OS=Homo sapiens GN=PSMC2 PE=1 SV=3	0	126.526	45.4965	17	45	17	1	433	48.603	5.95	Not Found	Not Found	Not Found	Not Found	Not Found	High	High	High	1.023	264.2	264.8	271				1	1	1						264.2	264.8	271						10	16	16	7.62
FALSE	High	Master Protein	P31948	Stress-induced-phosphoprotein 1 OS=Homo sapiens GN=STIP1 PE=1 SV=1	0	98.5311	30.9392	17	44	17	1	543	62.599	6.8	High	Not Found	Not Found	Not Found	Not Found	High	High	High	0.971	311.1	90.3	87.6	98.22			2	1	1	527.1					95	90.3	87.6	1					13	18	18	3.806
FALSE	High	Master Protein	P39023	60S ribosomal protein L3 OS=Homo sapiens GN=RPL3 PE=1 SV=2	0	113.624	36.7246	17	43	17	1	403	46.08	10.18	High	Not Found	Not Found	Not Found	Not Found	High	High	High	0.927	286.7	117.6	109.1	79.25			2	1	1	447.3					126	117.6	109.1	1					15	18	18	27.48
FALSE	High	Master Protein	Q14566	DNA replication licensing factor MCM6 OS=Homo sapiens GN=MCM6 PE=1 SV=1	0	111.435	23.2643	17	38	17	1	821	92.831	5.41	Not Found	Not Found	Not Found	Not Found	Not Found	High	High	High	0.974	295.2	255.7	249.1				1	1	1						295.2	255.7	249.1						14	17	17	1.637
FALSE	High	Master Protein	Q13200	26S proteasome non-ATPase regulatory subunit 2 OS=Homo sapiens GN=PSMD2 PE=1 SV=3	0	113.997	23.6784	17	37	17	1	908	100.136	5.2	Not Found	Not Found	Not Found	Not Found	Not Found	High	High	High	1.013	300.7	248.1	251.3				1	1	1						300.7	248.1	251.3						10	13	13	1.868
FALSE	High	Master Protein	Q13435	Splicing factor 3B subunit 2 OS=Homo sapiens GN=SF3B2 PE=1 SV=2	0	110.629	20.8939	17	36	17	1	895	100.165	5.67	Not Found	Not Found	Not Found	Not Found	Not Found	High	High	High	0.936	400.7	206.2	193.1				1	1	1						400.7	206.2	193.1						11	17	17	2.775
FALSE	High	Master Protein	P14868	Aspartate--tRNA ligase, cytoplasmic OS=Homo sapiens GN=DARS PE=1 SV=2	0	102.676	37.3253	17	34	17	1	501	57.1	6.55	Not Found	Not Found	Not Found	Not Found	Not Found	High	High	High	0.938	328	243.6	228.5				1	1	1						328	243.6	228.5						10	17	17	4.012
FALSE	High	Master Protein	Q9H0A0	RNA cytidine acetyltransferase OS=Homo sapiens GN=NAT10 PE=1 SV=2	0	109.171	21.4634	17	34	17	1	1025	115.657	8.27	Not Found	High	Not Found	Not Found	Not Found	High	High	High	0.956	265	273.5	261.4				1	1	1						265	273.5	261.4						9	14	14	1.668
FALSE	High	Master Protein	P49589	Cysteine--tRNA ligase, cytoplasmic OS=Homo sapiens GN=CARS PE=1 SV=3	0	114.258	27.8075	17	34	17	1	748	85.419	6.76	Not Found	Not Found	Not Found	Not Found	Not Found	High	High	High	1.04	179.6	304.1	316.3				1	1	1						179.6	304.1	316.3						7	16	16	3.329
FALSE	High	Master Protein	P54136	Arginine--tRNA ligase, cytoplasmic OS=Homo sapiens GN=RARS PE=1 SV=2	0	92.8367	26.3636	17	33	17	1	660	75.331	6.68	Not Found	Not Found	Not Found	Not Found	Not Found	High	High	High	0.996	316	242.4	241.6				1	1	1						316	242.4	241.6						11	16	16	3.245
FALSE	High	Master Protein	Q8N1F7	Nuclear pore complex protein Nup93 OS=Homo sapiens GN=NUP93 PE=1 SV=2	0	109.546	22.8327	17	32	17	1	819	93.43	5.72	Not Found	Not Found	Not Found	Not Found	Not Found	High	High	High	0.986	252.5	275.6	271.8				1	1	1						252.5	275.6	271.8						7	17	17	1.868
FALSE	High	Master Protein	P51659	Peroxisomal multifunctional enzyme type 2 OS=Homo sapiens GN=HSD17B4 PE=1 SV=3	0	95.6264	28.8043	17	29	17	1	736	79.636	8.84	Not Found	Not Found	Not Found	Not Found	Not Found	High	High	High	0.921	214.5	304.8	280.7				1	1	1						214.5	304.8	280.7						8	14	14	2.7
FALSE	High	Master Protein	P50570	Dynamin-2 OS=Homo sapiens GN=DNM2 PE=1 SV=2	0	107.587	25.0575	17	28	17	1	870	98.003	7.44	Not Found	Not Found	Not Found	Not Found	Not Found	High	High	High	0.91	314.9	253.9	231.2				1	1	1						314.9	253.9	231.2						7	13	13	1.976
FALSE	High	Master Protein	P12081	Histidine--tRNA ligase, cytoplasmic OS=Homo sapiens GN=HARS PE=1 SV=2	0	74.9308	31.6306	17	28	17	1	509	57.374	5.88	Not Found	Not Found	Not Found	Not Found	Not Found	High	High	High	0.97	285.6	261.1	253.3				1	1	1						285.6	261.1	253.3						10	17	17	3.252
FALSE	High	Master Protein	Q92900	Regulator of nonsense transcripts 1 OS=Homo sapiens GN=UPF1 PE=1 SV=2	0	82.6497	19.3977	17	25	17	1	1129	124.267	6.61	Not Found	Not Found	Not Found	Not Found	Not Found	High	High	High	1.021	214.1	290	295.9				1	1	1						214.1	290	295.9						5	16	16	1.102
FALSE	High	Master Protein	P11387	DNA topoisomerase 1 OS=Homo sapiens GN=TOP1 PE=1 SV=2	0	61.5741	20	17	23	17	1	765	90.669	9.31	Not Found	Not Found	Not Found	Not Found	Not Found	High	High	High	0.928	314.5	251.9	233.6				1	1	1						314.5	251.9	233.6						12	17	17	1.938
FALSE	High	Master Protein	P28838	Cytosol aminopeptidase OS=Homo sapiens GN=LAP3 PE=1 SV=3	0	83.0545	41.4258	17	22	17	1	519	56.131	7.93	Not Found	Not Found	Not Found	Not Found	Not Found	High	High	High	0.974	218.4	294.6	287				1	1	1						218.4	294.6	287						7	15	15	2.594
FALSE	High	Master Protein	Q5JTH9	RRP12-like protein OS=Homo sapiens GN=RRP12 PE=1 SV=2	0	73.6299	15.4973	18	21	17	1	1297	143.611	8.75	Not Found	Not Found	Not Found	Not Found	Not Found	High	High	High	0.942	303	255.9	241.1				1	1	1						303	255.9	241.1						8	15	15	0.889
FALSE	High	Master Protein	Q9BTC0	Death-inducer obliterator 1 OS=Homo sapiens GN=DIDO1 PE=1 SV=5	0	75.0722	13.5268	18	20	17	1	2240	243.723	7.88	Not Found	Not Found	Not Found	Not Found	Not Found	High	High	High	1.069	280.2	251.3	268.5				1	1	1						280.2	251.3	268.5						7	14	14	0.359
FALSE	High	Master Protein	P05023	Sodium/potassium-transporting ATPase subunit alpha-1 OS=Homo sapiens GN=ATP1A1 PE=1 SV=1	0	268.149	34.5064	29	105	16	1	1023	112.824	5.49	Not Found	Not Found	Not Found	Not Found	Not Found	High	High	High	0.994	259.2	271.2	269.7				1	1	1						259.2	271.2	269.7						23	30	30	12.043
FALSE	High	Master Protein	P12956	X-ray repair cross-complementing protein 6 OS=Homo sapiens GN=XRCC6 PE=1 SV=2	0	129.838	31.0345	16	68	16	1	609	69.799	6.64	Not Found	Not Found	Not Found	Not Found	Not Found	High	High	High	0.985	244.2	280.1	275.8				1	1	1						244.2	280.1	275.8						12	15	15	4.623
FALSE	High	Master Protein	Q9UQ80	Proliferation-associated protein 2G4 OS=Homo sapiens GN=PA2G4 PE=1 SV=3	0	124.535	47.2081	16	61	16	1	394	43.759	6.55	High	Not Found	Not Found	Not Found	Not Found	High	High	High	1.077	325.4	71.9	77.4	107.14			2	1	1	571.9					78.9	71.9	77.4	1					11	17	17	19.893
FALSE	High	Master Protein	Q06210	Glutamine--fructose-6-phosphate aminotransferase [isomerizing] 1 OS=Homo sapiens GN=GFPT1 PE=1 SV=3	0	166.555	34.907	19	59	16	1	699	78.756	7.11	Not Found	Not Found	Not Found	Not Found	Not Found	High	High	High	1.036	192.5	298.4	309.1				1	1	1						192.5	298.4	309.1						9	19	19	4.69
FALSE	High	Master Protein	Q01813	ATP-dependent 6-phosphofructokinase, platelet type OS=Homo sapiens GN=PFKP PE=1 SV=2	0	177.657	32.5255	20	56	16	1	784	85.542	7.55	High	High	Not Found	Not Found	Not Found	High	High	High	0.919	263	5.8	5.3	88.49			3	1	1	325.4	458.1				5.4	5.8	5.3	1	1				8	17	17	6.197
FALSE	High	Master Protein	P31939	Bifunctional purine biosynthesis protein PURH OS=Homo sapiens GN=ATIC PE=1 SV=3	0	152.594	35.8108	16	49	16	1	592	64.575	6.71	Not Found	Not Found	Not Found	Not Found	Not Found	High	High	High	0.96	261.5	274.8	263.7				1	1	1						261.5	274.8	263.7						11	16	16	5.078
FALSE	High	Master Protein	P02786	Transferrin receptor protein 1 OS=Homo sapiens GN=TFRC PE=1 SV=2	0	99.343	23.5526	16	41	16	1	760	84.818	6.61	Not Found	Not Found	Not Found	Not Found	Not Found	High	High	High	1.031	286.2	252.9	260.8				1	1	1						286.2	252.9	260.8						12	18	18	2.384
FALSE	High	Master Protein	Q01518	Adenylyl cyclase-associated protein 1 OS=Homo sapiens GN=CAP1 PE=1 SV=5	0	116.422	39.1579	16	38	16	1	475	51.869	8.06	Not Found	Not Found	High	Not Found	Not Found	High	High	High	0.892	380.7	20.4	18.2	133			2	1	1			738.8			22.7	20.4	18.2			1			8	16	16	6.565
FALSE	High	Master Protein	P04843	Dolichyl-diphosphooligosaccharide--protein glycosyltransferase subunit 1 OS=Homo sapiens GN=RPN1 PE=1 SV=1	0	92.6484	27.8418	16	37	16	1	607	68.527	6.38	Not Found	Not Found	Not Found	Not Found	Not Found	High	High	High	0.854	283.8	278.4	237.8				1	1	1						283.8	278.4	237.8						9	15	15	2.252
FALSE	High	Master Protein	P55884	Eukaryotic translation initiation factor 3 subunit B OS=Homo sapiens GN=EIF3B PE=1 SV=3	0	125.899	28.9926	16	35	16	1	814	92.424	5	Not Found	Not Found	Not Found	Not Found	Not Found	High	High	High	0.917	249.1	287.4	263.5				1	1	1						249.1	287.4	263.5						9	14	14	3.16
FALSE	High	Master Protein	P17655	Calpain-2 catalytic subunit OS=Homo sapiens GN=CAPN2 PE=1 SV=6	0	120.286	32.8571	16	35	16	1	700	79.945	4.98	Not Found	Not Found	Not Found	Not Found	Not Found	High	High	High	1.011	281.5	257.8	260.8				1	1	1						281.5	257.8	260.8						9	14	14	4.135
FALSE	High	Master Protein	Q14157	Ubiquitin-associated protein 2-like OS=Homo sapiens GN=UBAP2L PE=1 SV=2	0	111.479	25.207	16	34	16	1	1087	114.465	7.11	Not Found	Not Found	Not Found	Not Found	Not Found	High	High	High	1.015	279.7	258.2	262.1				1	1	1						279.7	258.2	262.1						8	14	14	3.85
FALSE	High	Master Protein	P40939	Trifunctional enzyme subunit alpha, mitochondrial OS=Homo sapiens GN=HADHA PE=1 SV=2	0	97.7023	26.9987	16	34	16	1	763	82.947	9.04	Not Found	Not Found	Not Found	Not Found	Not Found	High	High	High	1.024	265.4	264.2	270.4				1	1	1						265.4	264.2	270.4						9	14	14	1.929
FALSE	High	Master Protein	Q9Y5B9	FACT complex subunit SPT16 OS=Homo sapiens GN=SUPT16H PE=1 SV=1	0	91.0346	15.6638	16	33	16	1	1047	119.838	5.66	Not Found	Not Found	Not Found	Not Found	Not Found	High	High	High	0.933	253.9	282.5	263.6				1	1	1						253.9	282.5	263.6						12	17	17	1.548
FALSE	High	Master Protein	Q15021	Condensin complex subunit 1 OS=Homo sapiens GN=NCAPD2 PE=1 SV=3	0	105.462	17.202	16	28	16	1	1401	157.082	6.61	Not Found	Not Found	Not Found	Not Found	Not Found	High	High	High	0.931	307.2	255.2	237.6				1	1	1						307.2	255.2	237.6						7	11	11	0.801
FALSE	High	Master Protein	P43246	DNA mismatch repair protein Msh2 OS=Homo sapiens GN=MSH2 PE=1 SV=1	0	81.9352	18.0942	16	28	16	1	934	104.677	5.77	High	Not Found	Not Found	Not Found	Not Found	High	High	High	1.018	325.4	73.9	75.2	107.14			2	1	1	571.9					78.9	73.9	75.2	1					10	13	13	1.716
FALSE	High	Master Protein	Q9UNM6	26S proteasome non-ATPase regulatory subunit 13 OS=Homo sapiens GN=PSMD13 PE=1 SV=2	0	91.0116	44.9468	16	26	16	1	376	42.918	5.81	High	Not Found	Not Found	Not Found	Not Found	High	High	High	0.985	345.7	54.7	53.8	120.41			2	1	1	640.1					51.4	54.7	53.8	1					9	17	17	7.377
FALSE	High	Master Protein	Q92896	Golgi apparatus protein 1 OS=Homo sapiens GN=GLG1 PE=1 SV=2	0	97.5313	18.2358	16	24	16	1	1179	134.464	6.9	Not Found	Not Found	Not Found	Not Found	Not Found	High	High	High	0.887	317.1	255.9	227				1	1	1						317.1	255.9	227						9	14	14	0.852
FALSE	High	Master Protein	O00159	Unconventional myosin-Ic OS=Homo sapiens GN=MYO1C PE=1 SV=4	0	68.7798	17.1214	17	24	16	1	1063	121.606	9.41	Not Found	Not Found	Not Found	Not Found	Not Found	High	High	High	0.994	236.3	282.6	281				1	1	1						236.3	282.6	281						6	15	15	1.036
FALSE	High	Master Protein	Q14573	Inositol 1,4,5-trisphosphate receptor type 3 OS=Homo sapiens GN=ITPR3 PE=1 SV=2	0	77.8375	9.95882	21	23	16	1	2671	303.912	6.48	Not Found	Not Found	Not Found	Not Found	Not Found	High	High	High	0.926	125.7	350.1	324.2				1	1	1						125.7	350.1	324.2						2	12	12	0.369
FALSE	High	Master Protein	Q08378	Golgin subfamily A member 3 OS=Homo sapiens GN=GOLGA3 PE=1 SV=2	0	87.3267	15.1535	16	23	16	1	1498	167.252	5.44	Not Found	Not Found	Not Found	Not Found	Not Found	High	High	High	1.023	208	292.7	299.3				1	1	1						208	292.7	299.3						4	9	9	0.616
FALSE	High	Master Protein	Q9H3U1	Protein unc-45 homolog A OS=Homo sapiens GN=UNC45A PE=1 SV=1	0	65.8139	20.0212	16	22	16	1	944	103.011	6.07	Not Found	Not Found	Not Found	Not Found	Not Found	High	High	High	0.944	342.1	235.6	222.3				1	1	1						342.1	235.6	222.3						5	13	13	1.003
FALSE	High	Master Protein	Q9NZB2	Constitutive coactivator of PPAR-gamma-like protein 1 OS=Homo sapiens GN=FAM120A PE=1 SV=2	0	88.3793	18.6047	16	22	16	1	1118	121.811	8.88	Not Found	Not Found	Not Found	Not Found	Not Found	High	High	High	1.022	256	269	275				1	1	1						256	269	275						8	15	15	1.302
FALSE	High	Master Protein	Q13045	Protein flightless-1 homolog OS=Homo sapiens GN=FLII PE=1 SV=2	0	84.5568	15.7604	16	21	16	1	1269	144.659	6.05	Not Found	Not Found	Not Found	Not Found	Not Found	High	High	High	0.967	313.8	247.2	239				1	1	1						313.8	247.2	239						8	14	14	0.863
FALSE	High	Master Protein	P53814	Smoothelin OS=Homo sapiens GN=SMTN PE=1 SV=7	0	67.4624	21.5921	16	21	16	1	917	98.998	9.07	Not Found	Not Found	Not Found	Not Found	Not Found	High	High	High	1.367	196.4	255	348.6				1	1	1						196.4	255	348.6						6	14	14	1.126
FALSE	High	Master Protein	Q9UPU5	Ubiquitin carboxyl-terminal hydrolase 24 OS=Homo sapiens GN=USP24 PE=1 SV=3	0	67.8571	8.58779	16	20	16	1	2620	294.178	6.14	Not Found	Not Found	Not Found	Not Found	Not Found	High	High	High	0.919	145	341.4	313.6				1	1	1						145	341.4	313.6						3	12	12	0.321
FALSE	High	Master Protein	Q9NVI1	Fanconi anemia group I protein OS=Homo sapiens GN=FANCI PE=1 SV=4	0	86.2324	16.2651	16	20	16	1	1328	149.229	6.74	Not Found	Not Found	Not Found	Not Found	Not Found	High	High	High	1.024	196.4	298.3	305.3				1	1	1						196.4	298.3	305.3						5	14	14	0.61
FALSE	High	Master Protein	Q9NXV6	CDKN2A-interacting protein OS=Homo sapiens GN=CDKN2AIP PE=1 SV=3	0	77.8955	41.2069	16	18	16	1	580	61.088	9.01	Not Found	Not Found	Not Found	Not Found	Not Found	High	High	High	0.993	184.4	308.9	306.7				1	1	1						184.4	308.9	306.7						3	13	13	1.966
FALSE	High	Master Protein	P06733	Alpha-enolase OS=Homo sapiens GN=ENO1 PE=1 SV=2	0	254.733	58.9862	19	588	15	1	434	47.139	7.39	High	Not Found	Not Found	Not Found	High	High	High	High	1.123	335	61.3	68.8	113.72			2	1	1					604.3	65.6	61.3	68.8					1	17	20	20	44.204
FALSE	High	Master Protein	Q15233	Non-POU domain-containing octamer-binding protein OS=Homo sapiens GN=NONO PE=1 SV=4	0	148.421	34.1826	17	86	15	1	471	54.197	8.95	Not Found	Not Found	Not Found	Not Found	Not Found	High	High	High	1.024	273.9	259.9	266.2				1	1	1						273.9	259.9	266.2						17	23	23	18.307
FALSE	High	Master Protein	P61978	Heterogeneous nuclear ribonucleoprotein K OS=Homo sapiens GN=HNRNPK PE=1 SV=1	0	140.796	36.2851	15	85	15	1	463	50.944	5.54	Not Found	Not Found	Not Found	Not Found	Not Found	High	High	High	1.015	274.7	260.6	264.6				1	1	1						274.7	260.6	264.6						14	17	17	12.738
FALSE	High	Master Protein	P80723	Brain acid soluble protein 1 OS=Homo sapiens GN=BASP1 PE=1 SV=2	0	166.213	77.533	15	81	15	1	227	22.68	4.63	Not Found	Not Found	High	Not Found	Not Found	High	High	High	1.168	362.1	35	40.9	130.93			2	1	1			697.3			26.9	35	40.9			1			8	15	15	344.511
FALSE	High	Master Protein	P30153	Serine/threonine-protein phosphatase 2A 65 kDa regulatory subunit A alpha isoform OS=Homo sapiens GN=PPP2R1A PE=1 SV=4	0	141.793	37.0119	19	62	15	1	589	65.267	5.11	Not Found	Not Found	Not Found	Not Found	Not Found	High	High	High	0.968	246	281.4	272.5				1	1	1						246	281.4	272.5						12	19	19	6.444
FALSE	High	Master Protein	P23396	40S ribosomal protein S3 OS=Homo sapiens GN=RPS3 PE=1 SV=2	0	88.9513	62.1399	15	50	15	1	243	26.671	9.66	Not Found	High	Not Found	Not Found	Not Found	High	High	High	0.974	366.3	34.1	33.2	126.64			2	1	1		694.3				38.3	34.1	33.2		1				13	15	15	22.357
FALSE	High	Master Protein	Q02790	Peptidyl-prolyl cis-trans isomerase FKBP4 OS=Homo sapiens GN=FKBP4 PE=1 SV=3	0	127.224	35.2941	15	47	15	1	459	51.772	5.43	Not Found	Not Found	Not Found	Not Found	Not Found	High	High	High	1.064	236.5	273	290.5				1	1	1						236.5	273	290.5						14	17	17	7.62
FALSE	High	Master Protein	Q96AE4	Far upstream element-binding protein 1 OS=Homo sapiens GN=FUBP1 PE=1 SV=3	0	112.409	34.472	20	46	15	1	644	67.518	7.61	Not Found	Not Found	Not Found	Not Found	Not Found	High	High	High	0.995	297.8	251.8	250.4				1	1	1						297.8	251.8	250.4						13	19	19	6.326
FALSE	High	Master Protein	O95373	Importin-7 OS=Homo sapiens GN=IPO7 PE=1 SV=1	0	118.97	19.4605	15	40	15	1	1038	119.44	4.82	Not Found	Not Found	Not Found	Not Found	Not Found	High	High	High	0.964	190.8	310.2	299				1	1	1						190.8	310.2	299						5	12	12	2.237
FALSE	High	Master Protein	P11388	DNA topoisomerase 2-alpha OS=Homo sapiens GN=TOP2A PE=1 SV=3	0	110.089	16.0026	23	36	15	1	1531	174.276	8.72	Not Found	Not Found	Not Found	Not Found	Not Found	High	High	High	1.067	247.8	267.1	285.1				1	1	1						247.8	267.1	285.1						14	22	22	1
FALSE	High	Master Protein	Q8NE71	ATP-binding cassette sub-family F member 1 OS=Homo sapiens GN=ABCF1 PE=1 SV=2	0	126.807	26.6272	15	35	15	1	845	95.866	6.8	Not Found	Not Found	Not Found	Not Found	Not Found	High	High	High	0.992	263.6	269.2	267.2				1	1	1						263.6	269.2	267.2						7	13	13	2.241
FALSE	High	Master Protein	Q9UNF1	Melanoma-associated antigen D2 OS=Homo sapiens GN=MAGED2 PE=1 SV=2	0	102.059	32.0132	15	34	15	1	606	64.914	9.32	Not Found	Not Found	High	Not Found	Not Found	High	High	High	1.028	384.4	15.3	15.8	134.84			2	1	1			751			17.9	15.3	15.8			1			11	12	12	4.179
FALSE	High	Master Protein	P17858	ATP-dependent 6-phosphofructokinase, liver type OS=Homo sapiens GN=PFKL PE=1 SV=6	0	112.125	29.4872	20	32	15	1	780	84.964	7.5	Not Found	Not Found	Not Found	Not Found	Not Found	High	High	High	0.874	315.5	258.5	225.9				1	1	1						315.5	258.5	225.9						10	18	18	2.782
FALSE	High	Master Protein	Q9P258	Protein RCC2 OS=Homo sapiens GN=RCC2 PE=1 SV=2	0	125.172	35.6322	15	32	15	1	522	56.049	8.78	Not Found	Not Found	Not Found	Not Found	Not Found	High	High	High	0.944	271.9	271.6	256.4				1	1	1						271.9	271.6	256.4						10	14	14	4.08
FALSE	High	Master Protein	Q9BPX3	Condensin complex subunit 3 OS=Homo sapiens GN=NCAPG PE=1 SV=1	0	100.841	19.7044	15	32	15	1	1015	114.262	5.59	Not Found	Not Found	Not Found	Not Found	Not Found	High	High	High	0.984	269.6	267.4	263				1	1	1						269.6	267.4	263						5	12	12	1.683
FALSE	High	Master Protein	Q13561	Dynactin subunit 2 OS=Homo sapiens GN=DCTN2 PE=1 SV=4	0	121.911	46.8828	15	32	15	1	401	44.204	5.21	Not Found	Not Found	Not Found	Not Found	Not Found	High	High	High	1.013	217.4	289.4	293.1				1	1	1						217.4	289.4	293.1						9	14	14	7.432
FALSE	High	Master Protein	P45974	Ubiquitin carboxyl-terminal hydrolase 5 OS=Homo sapiens GN=USP5 PE=1 SV=2	0	121.638	22.6107	15	31	15	1	858	95.725	5.03	Not Found	Not Found	Not Found	Not Found	Not Found	High	High	High	0.979	265	270.3	264.7				1	1	1						265	270.3	264.7						9	15	15	2.7
FALSE	High	Master Protein	P48444	Coatomer subunit delta OS=Homo sapiens GN=ARCN1 PE=1 SV=1	0	103.515	31.1155	15	31	15	1	511	57.174	6.21	Not Found	Not Found	Not Found	Not Found	Not Found	High	High	High	1.003	247.8	275.7	276.5				1	1	1						247.8	275.7	276.5						11	15	15	5.813
FALSE	High	Master Protein	Q9H4A4	Aminopeptidase B OS=Homo sapiens GN=RNPEP PE=1 SV=2	0	104.241	26.3077	15	29	15	1	650	72.549	5.74	Not Found	Not Found	Not Found	Not Found	Not Found	High	High	High	0.919	214.7	304.9	280.4				1	1	1						214.7	304.9	280.4						8	15	15	4.275
FALSE	High	Master Protein	P31350	Ribonucleoside-diphosphate reductase subunit M2 OS=Homo sapiens GN=RRM2 PE=1 SV=1	0	79.5767	49.3573	16	26	15	1	389	44.849	5.38	Not Found	Not Found	Not Found	Not Found	Not Found	High	High	High	1.005	233.7	282.5	283.9				1	1	1						233.7	282.5	283.9						8	14	14	4.995
FALSE	High	Master Protein	P46063	ATP-dependent DNA helicase Q1 OS=Homo sapiens GN=RECQL PE=1 SV=3	0	55.4075	23.8829	15	25	15	1	649	73.41	7.88	High	Not Found	Not Found	Not Found	Not Found	High	High	High	0.942	318.8	83.6	78.7	107.6			2	1	1	561.4					76.3	83.6	78.7	1					11	15	15	2.665
FALSE	High	Master Protein	P49189	4-trimethylaminobutyraldehyde dehydrogenase OS=Homo sapiens GN=ALDH9A1 PE=1 SV=3	0	78.5665	33.1984	15	25	15	1	494	53.767	5.87	Not Found	Not Found	Not Found	Not Found	Not Found	High	High	High	0.977	257.4	274.4	268.2				1	1	1						257.4	274.4	268.2						9	14	14	4.505
FALSE	High	Master Protein	Q9UBT2	SUMO-activating enzyme subunit 2 OS=Homo sapiens GN=UBA2 PE=1 SV=2	0	73.702	30.9375	15	24	15	1	640	71.179	5.29	Not Found	Not Found	Not Found	Not Found	Not Found	High	High	High	1.043	171.3	307.7	321				1	1	1						171.3	307.7	321						4	13	13	2.371
FALSE	High	Master Protein	P24928	DNA-directed RNA polymerase II subunit RPB1 OS=Homo sapiens GN=POLR2A PE=1 SV=2	0	82.2787	9.54315	15	23	15	1	1970	217.039	7.37	High	Not Found	Not Found	Not Found	Not Found	High	High	High	1.033	349.3	49.9	51.5	120.32			2	1	1	646.5					52.1	49.9	51.5	1					7	13	13	0.528
FALSE	High	Master Protein	Q8IVT2	Mitotic interactor and substrate of PLK1 OS=Homo sapiens GN=MISP PE=1 SV=1	0	75.0451	32.6951	15	23	15	1	679	75.311	6.83	Not Found	Not Found	Not Found	Not Found	Not Found	High	High	High	1.128	167.5	297.2	335.3				1	1	1						167.5	297.2	335.3						4	14	14	1.994
FALSE	High	Master Protein	Q29RF7	Sister chromatid cohesion protein PDS5 homolog A OS=Homo sapiens GN=PDS5A PE=1 SV=1	0	82.1792	14.3605	17	22	15	1	1337	150.734	7.91	Not Found	Not Found	Not Found	Not Found	Not Found	High	High	High	0.967	253.6	277.7	268.6				1	1	1						253.6	277.7	268.6						7	17	17	0.722
FALSE	High	Master Protein	Q5JSH3	WD repeat-containing protein 44 OS=Homo sapiens GN=WDR44 PE=1 SV=1	0	96.7286	25.3012	15	22	15	1	913	101.304	5.45	Not Found	Not Found	Not Found	Not Found	Not Found	High	High	High	0.999	234.8	282.8	282.4				1	1	1						234.8	282.8	282.4						6	12	12	1.209
FALSE	High	Master Protein	Q08379	Golgin subfamily A member 2 OS=Homo sapiens GN=GOLGA2 PE=1 SV=3	0	89.73	22.1557	15	22	15	1	1002	113.017	5.02	Not Found	Not Found	Not Found	Not Found	Not Found	High	High	High	1.028	159.7	315.7	324.6				1	1	1						159.7	315.7	324.6						4	12	12	1.127
FALSE	High	Master Protein	P11498	Pyruvate carboxylase, mitochondrial OS=Homo sapiens GN=PC PE=1 SV=2	0	73.0443	16.5535	15	22	15	1	1178	129.551	6.84	Not Found	Not Found	Not Found	Not Found	Not Found	High	High	High	1.069	210.9	284.7	304.3				1	1	1						210.9	284.7	304.3						5	12	12	0.821
FALSE	High	Master Protein	P21399	Cytoplasmic aconitate hydratase OS=Homo sapiens GN=ACO1 PE=1 SV=3	0	61.3712	19.7975	15	21	15	1	889	98.337	6.68	Not Found	Not Found	Not Found	Not Found	Not Found	High	High	High	0.967	294.6	257	248.4				1	1	1						294.6	257	248.4						7	12	12	1.512
FALSE	High	Master Protein	O95071	E3 ubiquitin-protein ligase UBR5 OS=Homo sapiens GN=UBR5 PE=1 SV=2	0	66.5796	7.71704	15	19	15	1	2799	309.158	5.85	Not Found	Not Found	Not Found	Not Found	Not Found	High	High	High	1.035	331.2	230.4	238.4				1	1	1						331.2	230.4	238.4						6	11	11	0.303
FALSE	High	Master Protein	Q03001	Dystonin OS=Homo sapiens GN=DST PE=1 SV=4	0	53.3167	2.87979	18	19	15	1	7570	860.127	5.25	High	Not Found	Not Found	Not Found	Not Found	High	High	High	1.135	392	7.5	8.5	140.22			2	1	1	780.7					3.3	7.5	8.5	1					2	10	10	0.094
FALSE	High	Master Protein	Q9UH65	Switch-associated protein 70 OS=Homo sapiens GN=SWAP70 PE=1 SV=1	0	61.4017	28.2051	15	18	15	1	585	68.954	5.87	Not Found	Not Found	Not Found	Not Found	Not Found	High	High	High	1.126	236.5	265.1	298.4				1	1	1						236.5	265.1	298.4						7	12	12	1.456
FALSE	High	Master Protein	Q14966	Zinc finger protein 638 OS=Homo sapiens GN=ZNF638 PE=1 SV=2	0	71.6357	12.0829	15	17	15	1	1978	220.488	6.38	Not Found	Not Found	Not Found	Not Found	Not Found	High	High	High	1.001	222.7	288.5	288.8				1	1	1						222.7	288.5	288.8						1	11	11	0.427
FALSE	High	Master Protein	O15027	Protein transport protein Sec16A OS=Homo sapiens GN=SEC16A PE=1 SV=3	0	51.7378	9.77513	15	17	15	1	2179	233.373	5.63	Not Found	Not Found	Not Found	Not Found	Not Found	High	High	High	1.028	314.7	239.2	246.1				1	1	1						314.7	239.2	246.1						8	12	12	0.487
FALSE	High	Master Protein	Q7L2E3	Putative ATP-dependent RNA helicase DHX30 OS=Homo sapiens GN=DHX30 PE=1 SV=1	0	50.952	16.2479	15	16	15	1	1194	133.855	8.78	Not Found	Not Found	Not Found	Not Found	Not Found	High	High	High	1.005	300.3	249.3	250.4				1	1	1						300.3	249.3	250.4						6	13	13	0.524
FALSE	High	Master Protein	P04075	Fructose-bisphosphate aldolase A OS=Homo sapiens GN=ALDOA PE=1 SV=2	0	242.343	47.8022	16	290	14	1	364	39.395	8.09	Not Found	Not Found	Not Found	Not Found	Not Found	High	High	High	0.989	280.7	261	258.3				1	1	1						280.7	261	258.3						17	18	18	66.002
FALSE	High	Master Protein	P0DMV9	Heat shock 70 kDa protein 1B OS=Homo sapiens GN=HSPA1B PE=1 SV=1	0	205.435	37.9095	22	140	14	1	641	70.009	5.66	Not Found	Not Found	Not Found	Not Found	Not Found	High	High	High	1.256	337.2	55.7	70	123.59			2	1	1		631.8				42.5	55.7	70		1				15	18	18	17.33
FALSE	High	Master Protein	P07355	Annexin A2 OS=Homo sapiens GN=ANXA2 PE=1 SV=2	0	103.25	43.0678	14	95	14	1	339	38.58	7.75	High	Not Found	Not Found	Not Found	Not Found	High	High	High	1.192	238.1	147.7	176.1	71.35			2	1	1	358.3					118	147.7	176.1	1					10	14	14	7.254
FALSE	High	Master Protein	P15311	Ezrin OS=Homo sapiens GN=EZR PE=1 SV=4	0	111.883	30.8874	22	74	14	1	586	69.37	6.27	High	Not Found	Not Found	Not Found	Not Found	High	High	High	1.081	302.8	93.4	101	89.95			2	1	1	495.4					110.2	93.4	101	1					11	16	16	6.897
FALSE	High	Master Protein	Q12931	Heat shock protein 75 kDa, mitochondrial OS=Homo sapiens GN=TRAP1 PE=1 SV=3	0	115.471	26.8466	15	54	14	1	704	80.06	8.21	Not Found	Not Found	Not Found	Not Found	Not Found	High	High	High	0.982	185.7	310	304.3				1	1	1						185.7	310	304.3						4	14	14	2.162
FALSE	High	Master Protein	O60664	Perilipin-3 OS=Homo sapiens GN=PLIN3 PE=1 SV=3	0	115.674	43.318	14	43	14	1	434	47.046	5.44	Not Found	Not Found	Not Found	Not Found	Not Found	High	High	High	0.975	313.9	246.2	239.9				1	1	1						313.9	246.2	239.9						11	12	12	5.31
FALSE	High	Master Protein	P27824	Calnexin OS=Homo sapiens GN=CANX PE=1 SV=2	0	75.3541	21.7905	14	38	14	1	592	67.526	4.6	Not Found	Not Found	Not Found	Not Found	Not Found	High	High	High	0.982	298.8	252.9	248.3				1	1	1						298.8	252.9	248.3						13	13	13	5.723
FALSE	High	Master Protein	Q15046	Lysine--tRNA ligase OS=Homo sapiens GN=KARS PE=1 SV=3	0	88.437	21.1055	14	36	14	1	597	68.005	6.35	Not Found	Not Found	Not Found	Not Found	Not Found	High	High	High	0.979	195.1	305.7	299.2				1	1	1						195.1	305.7	299.2						8	15	15	4.532
FALSE	High	Master Protein	O76021	Ribosomal L1 domain-containing protein 1 OS=Homo sapiens GN=RSL1D1 PE=1 SV=3	0	83.3229	30.6122	14	31	14	1	490	54.939	10.13	Not Found	Not Found	Not Found	Not Found	Not Found	High	High	High	0.902	303.4	261	235.5				1	1	1						303.4	261	235.5						10	14	14	8.152
FALSE	High	Master Protein	P05556	Integrin beta-1 OS=Homo sapiens GN=ITGB1 PE=1 SV=2	0	86.2896	19.5489	14	30	14	1	798	88.357	5.39	Not Found	Not Found	Not Found	Not Found	Not Found	High	High	High	0.975	260.2	273.3	266.5				1	1	1						260.2	273.3	266.5						11	13	13	2.35
FALSE	High	Master Protein	O43242	26S proteasome non-ATPase regulatory subunit 3 OS=Homo sapiens GN=PSMD3 PE=1 SV=2	0	92.635	29.4007	14	29	14	1	534	60.939	8.44	Not Found	Not Found	Not Found	Not Found	Not Found	High	High	High	1.019	325.1	235.2	239.7				1	1	1						325.1	235.2	239.7						9	13	13	3.125
FALSE	High	Master Protein	Q96AY3	Peptidyl-prolyl cis-trans isomerase FKBP10 OS=Homo sapiens GN=FKBP10 PE=1 SV=1	0	102.474	29.7251	14	28	14	1	582	64.204	5.62	Not Found	Not Found	Not Found	Not Found	Not Found	High	High	High	0.951	221.5	296.5	282				1	1	1						221.5	296.5	282						7	14	14	2.932
FALSE	High	Master Protein	O95757	Heat shock 70 kDa protein 4L OS=Homo sapiens GN=HSPA4L PE=1 SV=3	0	107.605	25.8641	16	27	14	1	839	94.453	5.88	Not Found	Not Found	Not Found	Not Found	Not Found	High	High	High	0.943	245.9	285.1	269				1	1	1						245.9	285.1	269						6	11	11	1.294
FALSE	High	Master Protein	P09960	Leukotriene A-4 hydrolase OS=Homo sapiens GN=LTA4H PE=1 SV=2	0	84.2571	26.1866	14	27	14	1	611	69.241	6.18	Not Found	Not Found	Not Found	Not Found	Not Found	High	High	High	0.953	307.2	252.3	240.5				1	1	1						307.2	252.3	240.5						8	13	13	1.985
FALSE	High	Master Protein	P52209	6-phosphogluconate dehydrogenase, decarboxylating OS=Homo sapiens GN=PGD PE=1 SV=3	0	92.1848	33.3333	14	27	14	1	483	53.106	7.23	Not Found	Not Found	Not Found	Not Found	Not Found	High	High	High	0.973	234.4	286.7	278.9				1	1	1						234.4	286.7	278.9						8	13	13	4.012
FALSE	High	Master Protein	O95831	Apoptosis-inducing factor 1, mitochondrial OS=Homo sapiens GN=AIFM1 PE=1 SV=1	0	91.6861	27.5693	14	27	14	1	613	66.859	8.95	Not Found	Not Found	Not Found	Not Found	Not Found	High	High	High	1.022	172.4	310.5	317.2				1	1	1						172.4	310.5	317.2						6	12	12	3.642
FALSE	High	Master Protein	Q9Y230	RuvB-like 2 OS=Homo sapiens GN=RUVBL2 PE=1 SV=3	0	83.9273	32.8294	14	25	14	1	463	51.125	5.64	Not Found	Not Found	Not Found	Not Found	Not Found	High	High	High	0.953	235.8	288.9	275.3				1	1	1						235.8	288.9	275.3						9	15	15	4.298
FALSE	High	Master Protein	Q14684	Ribosomal RNA processing protein 1 homolog B OS=Homo sapiens GN=RRP1B PE=1 SV=3	0	95.421	29.8153	14	25	14	1	758	84.375	9.76	Not Found	Not Found	Not Found	Not Found	Not Found	High	High	High	1.002	260.8	269.4	269.8				1	1	1						260.8	269.4	269.8						7	13	13	2.665
FALSE	High	Master Protein	Q9H9A6	Leucine-rich repeat-containing protein 40 OS=Homo sapiens GN=LRRC40 PE=1 SV=1	0	77.2389	30.897	14	24	14	1	602	68.207	6.43	Not Found	Not Found	Not Found	Not Found	Not Found	High	High	High	0.959	240.3	285.6	274				1	1	1						240.3	285.6	274						6	11	11	2.455
FALSE	High	Master Protein	Q9H8Y5	Ankyrin repeat and zinc finger domain-containing protein 1 OS=Homo sapiens GN=ANKZF1 PE=1 SV=1	0	80.0215	28.2369	14	24	14	1	726	80.877	8.41	Not Found	Not Found	Not Found	Not Found	Not Found	High	High	High	0.996	277.4	261.9	260.7				1	1	1						277.4	261.9	260.7						7	12	12	1.918
FALSE	High	Master Protein	Q02218	2-oxoglutarate dehydrogenase, mitochondrial OS=Homo sapiens GN=OGDH PE=1 SV=3	0	58.0568	15.9335	14	23	14	1	1023	115.861	6.86	Not Found	Not Found	Not Found	Not Found	Not Found	High	High	High	1.02	196.7	298.7	304.6				1	1	1						196.7	298.7	304.6						6	13	13	1.154
FALSE	High	Master Protein	Q9NSE4	Isoleucine--tRNA ligase, mitochondrial OS=Homo sapiens GN=IARS2 PE=1 SV=2	0	73.7159	16.6996	14	22	14	1	1012	113.719	7.2	Not Found	Not Found	Not Found	Not Found	Not Found	High	High	High	0.946	251.7	281.8	266.5				1	1	1						251.7	281.8	266.5						7	11	11	1.096
FALSE	High	Master Protein	Q3LXA3	Triokinase/FMN cyclase OS=Homo sapiens GN=TKFC PE=1 SV=2	0	89.1834	32.6957	14	22	14	1	575	58.91	7.49	Not Found	Not Found	Not Found	Not Found	Not Found	High	High	High	0.958	246.8	282.6	270.6				1	1	1						246.8	282.6	270.6						4	12	12	3.037
FALSE	High	Master Protein	P22059	Oxysterol-binding protein 1 OS=Homo sapiens GN=OSBP PE=1 SV=1	0	52.0563	19.5787	14	22	14	1	807	89.365	7.3	Not Found	Not Found	Not Found	Not Found	Not Found	High	High	High	0.971	190.8	309.2	300.1				1	1	1						190.8	309.2	300.1						6	12	12	1.358
FALSE	High	Master Protein	Q9HAV4	Exportin-5 OS=Homo sapiens GN=XPO5 PE=1 SV=1	0	84.5575	14.7841	14	22	14	1	1204	136.222	5.8	Not Found	Not Found	Not Found	Not Found	Not Found	High	High	High	1.006	339	229.8	231.2				1	1	1						339	229.8	231.2						7	12	12	1.015
FALSE	High	Master Protein	P43304	Glycerol-3-phosphate dehydrogenase, mitochondrial OS=Homo sapiens GN=GPD2 PE=1 SV=3	0	73.2552	19.6699	14	21	14	1	727	80.802	7.69	Not Found	Not Found	Not Found	Not Found	Not Found	High	High	High	0.922	291.5	264.6	244				1	1	1						291.5	264.6	244						7	13	13	1.291
FALSE	High	Master Protein	P18583	Protein SON OS=Homo sapiens GN=SON PE=1 SV=4	0	84.6924	8.4089	14	21	14	1	2426	263.664	5.64	Not Found	Not Found	Not Found	Not Found	Not Found	High	High	High	0.965	227.7	291.3	281				1	1	1						227.7	291.3	281						7	13	13	0.698
FALSE	High	Master Protein	Q15020	Squamous cell carcinoma antigen recognized by T-cells 3 OS=Homo sapiens GN=SART3 PE=1 SV=1	0	86.0666	16.1994	15	21	14	1	963	109.865	5.57	Not Found	Not Found	Not Found	Not Found	Not Found	High	High	High	1.002	173.9	312.7	313.3				1	1	1						173.9	312.7	313.3						4	13	13	1.154
FALSE	High	Master Protein	P10515	Dihydrolipoyllysine-residue acetyltransferase component of pyruvate dehydrogenase complex, mitochondrial OS=Homo sapiens GN=DLAT PE=1 SV=3	0	53.0256	26.2751	14	20	14	1	647	68.953	7.84	Not Found	Not Found	Not Found	Not Found	Not Found	High	High	High	0.986	215.6	294.2	290.2				1	1	1						215.6	294.2	290.2						5	11	11	2.275
FALSE	High	Master Protein	O00267	Transcription elongation factor SPT5 OS=Homo sapiens GN=SUPT5H PE=1 SV=1	0	77.4293	18.1233	14	20	14	1	1087	120.925	5.06	Not Found	Not Found	Not Found	Not Found	Not Found	High	High	High	1.014	219	288.5	292.4				1	1	1						219	288.5	292.4						3	14	14	1.043
FALSE	High	Master Protein	Q86XL3	Ankyrin repeat and LEM domain-containing protein 2 OS=Homo sapiens GN=ANKLE2 PE=1 SV=4	0	77.0795	21.7484	14	18	14	1	938	104.05	7.09	Not Found	Not Found	Not Found	Not Found	Not Found	High	High	High	0.998	228.6	286	285.4				1	1	1						228.6	286	285.4						4	12	12	0.867
FALSE	High	Master Protein	Q86TC9	Myopalladin OS=Homo sapiens GN=MYPN PE=1 SV=2	0	71.8284	14.6212	15	17	14	1	1320	145.167	6.77	Not Found	High	Not Found	Not Found	Not Found	High	High	High	0.987	389	11.1	10.9	137.53			2	1	1		767.3				10.7	11.1	10.9		1				10	14	14	0.697
FALSE	High	Master Protein	Q92614	Unconventional myosin-XVIIIa OS=Homo sapiens GN=MYO18A PE=1 SV=3	0	91.105	9.93184	14	17	14	1	2054	232.971	6.3	Not Found	Not Found	Not Found	Not Found	Not Found	High	High	High	0.99	153.1	325	321.9				1	1	1						153.1	325	321.9						3	12	12	0.331
FALSE	High	Master Protein	P49790	Nuclear pore complex protein Nup153 OS=Homo sapiens GN=NUP153 PE=1 SV=2	0	63.1609	12.8136	14	17	14	1	1475	153.843	8.73	Not Found	Not Found	Not Found	Not Found	Not Found	High	High	High	1.079	275.2	252.4	272.4				1	1	1						275.2	252.4	272.4						7	14	14	0.778
FALSE	High	Master Protein	P08758	Annexin A5 OS=Homo sapiens GN=ANXA5 PE=1 SV=2	0	127.325	48.125	14	100	13	1	320	35.914	5.05	Not Found	Not Found	Not Found	Not Found	Not Found	High	High	High	1.187	192.9	277.6	329.4				1	1	1						192.9	277.6	329.4						10	15	15	10.938
FALSE	High	Master Protein	P04083	Annexin A1 OS=Homo sapiens GN=ANXA1 PE=1 SV=2	0	146.436	39.5954	13	85	13	1	346	38.69	7.02	Not Found	Not Found	Not Found	Not Found	Not Found	High	High	High	1.088	244.7	266	289.3				1	1	1						244.7	266	289.3						13	14	14	18.307
FALSE	High	Master Protein	P61247	40S ribosomal protein S3a OS=Homo sapiens GN=RPS3A PE=1 SV=2	0	94.4391	47.7273	13	82	13	1	264	29.926	9.73	Not Found	Not Found	Not Found	Not Found	Not Found	High	High	High	0.966	270.4	269.5	260.2				1	1	1						270.4	269.5	260.2						12	14	14	22.357
FALSE	High	Master Protein	P35237	Serpin B6 OS=Homo sapiens GN=SERPINB6 PE=1 SV=3	0	151.682	42.8191	13	80	13	1	376	42.594	5.27	Not Found	Not Found	Not Found	Not Found	Not Found	High	High	High	0.992	234	284.1	281.9				1	1	1						234	284.1	281.9						12	18	18	18.573
FALSE	High	Master Protein	P07910	Heterogeneous nuclear ribonucleoproteins C1/C2 OS=Homo sapiens GN=HNRNPC PE=1 SV=4	0	99.3137	36.2745	13	65	13	1	306	33.65	5.08	Not Found	Not Found	Not Found	Not Found	Not Found	High	High	High	0.969	269.5	269.4	261.1				1	1	1						269.5	269.4	261.1						9	13	13	10.053
FALSE	High	Master Protein	Q12906	Interleukin enhancer-binding factor 3 OS=Homo sapiens GN=ILF3 PE=1 SV=3	0	125.479	22.1477	18	63	13	1	894	95.279	8.76	Not Found	Not Found	Not Found	Not Found	Not Found	High	High	High	0.972	227	290.5	282.5				1	1	1						227	290.5	282.5						12	20	20	3.885
FALSE	High	Master Protein	P29401	Transketolase OS=Homo sapiens GN=TKT PE=1 SV=3	0	96.3307	25.3612	13	62	13	1	623	67.835	7.66	Not Found	Not Found	Not Found	Not Found	Not Found	High	High	High	0.986	278.2	262.7	259.1				1	1	1						278.2	262.7	259.1						10	12	12	3.354
FALSE	High	Master Protein	P22234	Multifunctional protein ADE2 OS=Homo sapiens GN=PAICS PE=1 SV=3	0	104.614	36.9412	13	58	13	1	425	47.049	7.23	Not Found	Not Found	Not Found	Not Found	Not Found	High	High	High	0.931	292.3	262.9	244.8				1	1	1						292.3	262.9	244.8						11	13	13	6.197
FALSE	High	Master Protein	P34897	Serine hydroxymethyltransferase, mitochondrial OS=Homo sapiens GN=SHMT2 PE=1 SV=3	0	93.3696	28.5714	13	47	13	1	504	55.958	8.53	Not Found	Not Found	Not Found	Not Found	Not Found	High	High	High	1.005	258.6	270	271.4				1	1	1						258.6	270	271.4						8	13	13	4.08
FALSE	High	Master Protein	P23246	Splicing factor, proline- and glutamine-rich OS=Homo sapiens GN=SFPQ PE=1 SV=2	0	92.8843	18.1047	14	44	13	1	707	76.102	9.44	Not Found	Not Found	Not Found	Not Found	Not Found	High	High	High	1.05	264.6	261.2	274.2				1	1	1						264.6	261.2	274.2						13	14	14	4.436
FALSE	High	Master Protein	P36952	Serpin B5 OS=Homo sapiens GN=SERPINB5 PE=1 SV=2	0	112.218	47.4667	13	41	13	1	375	42.073	6.05	Not Found	Not Found	Not Found	Not Found	Not Found	High	High	High	0.913	249	288	263				1	1	1						249	288	263						8	13	13	10.103
FALSE	High	Master Protein	P05187	Alkaline phosphatase, placental type OS=Homo sapiens GN=ALPP PE=1 SV=2	0	109.712	33.4579	13	38	13	1	535	57.917	6.29	Not Found	High	Not Found	Not Found	Not Found	High	High	High	0.982	256.6	274.2	269.2				1	1	1						256.6	274.2	269.2						9	11	11	4.012
FALSE	High	Master Protein	Q9BZZ5	Apoptosis inhibitor 5 OS=Homo sapiens GN=API5 PE=1 SV=3	0	79.9964	33.9695	13	36	13	1	524	58.968	7.34	Not Found	Not Found	Not Found	Not Found	Not Found	High	High	High	0.916	281	270.9	248.1				1	1	1						281	270.9	248.1						7	12	12	2.06
FALSE	High	Master Protein	P14923	Junction plakoglobin OS=Homo sapiens GN=JUP PE=1 SV=3	0	119.274	28.1879	16	35	13	1	745	81.693	6.14	Not Found	Not Found	Not Found	Not Found	Not Found	High	High	High	0.894	259.4	285.4	255.1				1	1	1						259.4	285.4	255.1						7	16	16	2.899
FALSE	High	Master Protein	O00469	Procollagen-lysine,2-oxoglutarate 5-dioxygenase 2 OS=Homo sapiens GN=PLOD2 PE=1 SV=2	0	73.3892	16.5536	13	33	13	1	737	84.632	6.71	Not Found	Not Found	Not Found	Not Found	Not Found	High	High	High	0.944	288.4	263.2	248.4				1	1	1						288.4	263.2	248.4						10	12	12	2.248
FALSE	High	Master Protein	Q99623	Prohibitin-2 OS=Homo sapiens GN=PHB2 PE=1 SV=2	0	71.8511	45.4849	13	32	13	1	299	33.276	9.83	High	Not Found	Not Found	Not Found	Not Found	High	High	High	0.985	339.1	61.3	60.4	118.62			2	1	1	623.6					54.7	61.3	60.4	1					7	12	12	4.38
FALSE	High	Master Protein	P23588	Eukaryotic translation initiation factor 4B OS=Homo sapiens GN=EIF4B PE=1 SV=2	0	74.2838	17.1849	13	32	13	1	611	69.11	5.73	Not Found	Not Found	Not Found	Not Found	High	High	High	High	1.022	387.2	12.6	12.9	135.36			2	1	1					757.8	16.6	12.6	12.9					1	11	13	13	4.08
FALSE	High	Master Protein	Q13620	Cullin-4B OS=Homo sapiens GN=CUL4B PE=1 SV=4	0	96.0395	23.3297	19	30	13	1	913	103.916	7.37	Not Found	Not Found	Not Found	Not Found	Not Found	High	High	High	0.916	321.9	249.5	228.6				1	1	1						321.9	249.5	228.6						11	18	18	1.512
FALSE	High	Master Protein	P13674	Prolyl 4-hydroxylase subunit alpha-1 OS=Homo sapiens GN=P4HA1 PE=1 SV=2	0	76.4532	25.6554	13	30	13	1	534	61.011	6.01	Not Found	Not Found	Not Found	Not Found	Not Found	High	High	High	0.96	260.4	275.3	264.4				1	1	1						260.4	275.3	264.4						9	13	13	3.437
FALSE	High	Master Protein	P62195	26S protease regulatory subunit 8 OS=Homo sapiens GN=PSMC5 PE=1 SV=1	0	79.9309	38.9163	14	29	13	1	406	45.597	7.55	Not Found	Not Found	Not Found	Not Found	Not Found	High	High	High	0.934	212.1	304	283.9				1	1	1						212.1	304	283.9						7	14	14	3.771
FALSE	High	Master Protein	Q2NL82	Pre-rRNA-processing protein TSR1 homolog OS=Homo sapiens GN=TSR1 PE=1 SV=1	0	93.6699	23.01	13	29	13	1	804	91.752	7.42	Not Found	Not Found	Not Found	Not Found	Not Found	High	High	High	0.944	184.2	316.8	299				1	1	1						184.2	316.8	299						4	14	14	3.281
FALSE	High	Master Protein	Q08945	FACT complex subunit SSRP1 OS=Homo sapiens GN=SSRP1 PE=1 SV=1	0	74.0377	23.8364	13	28	13	1	709	81.024	6.87	Not Found	Not Found	Not Found	Not Found	Not Found	High	High	High	0.943	215.7	300.6	283.6				1	1	1						215.7	300.6	283.6						6	10	10	1.985
FALSE	High	Master Protein	Q8TAQ2	SWI/SNF complex subunit SMARCC2 OS=Homo sapiens GN=SMARCC2 PE=1 SV=1	0	96.6045	15.0741	17	28	13	1	1214	132.797	5.69	Not Found	Not Found	Not Found	Not Found	Not Found	High	High	High	0.958	268.4	271.5	260.1				1	1	1						268.4	271.5	260.1						7	15	15	1.637
FALSE	High	Master Protein	O00231	26S proteasome non-ATPase regulatory subunit 11 OS=Homo sapiens GN=PSMD11 PE=1 SV=3	0	85.8246	38.6256	13	27	13	1	422	47.434	6.48	Not Found	Not Found	Not Found	Not Found	Not Found	High	High	High	0.944	194.1	311.7	294.2				1	1	1						194.1	311.7	294.2						6	12	12	3.217
FALSE	High	Master Protein	Q02880	DNA topoisomerase 2-beta OS=Homo sapiens GN=TOP2B PE=1 SV=3	0	79.9953	14.8831	20	27	13	1	1626	183.152	8	Not Found	Not Found	Not Found	Not Found	Not Found	High	High	High	0.994	118	342	340				1	1	1						118	342	340						1	11	11	0.681
[truncated: 4,272 more rows]
[truncated: 3 more columns]

[truncated: 1 more sheets: Raw data for replicate 2]
